# Supplementary material for: Development of a prognostic scoring model for predicting the survival of elderly patients with hepatocellular carcinoma
Source: PeerJ. 2020 Feb 4;8:e8497. doi: 10.7717/peerj.8497 (PMC7006515; doi:10.7717/peerj.8497)
Supplement: Supplemental Information 1 [file peerj-08-8497-s001.xlsx]

## Sheet: Sheet1
Age recode with <1 year olds	Race recode (White, Black, Other)	Sex	Diagnostic Confirmation	Grade	TNM 7/CS v0204+ Schema	Histologic Type ICD-O-3	Derived AJCC Stage Group, 7th ed (2010-2015)	Derived AJCC Stage Group, 6th ed (2004-2015)	AJCC stage 3rd edition (1988-2003)	RX Summ--Surg Prim Site (1998+)	RX Summ--Scope Reg LN Sur (2003+)	RX Summ--Surg Oth Reg/Dis (2003+)	Reason no cancer-directed surgery	Scope of reg lymph nd surg (1998-2002)	RX Summ--Reg LN Examined (1998-2002)	Surgery of oth reg/dis sites (1998-2002)	Site specific surgery (1973-1997 varying detail by year and site)	Tumor Size Summary (2016+)	Regional nodes examined (1988+)	CS tumor size (2004-2015)	CS extension (2004-2015)	CS lymph nodes (2004-2015)	CS mets at dx (2004-2015)	CS Mets Eval (2004-2015)	CS site-specific factor 1 (2004+ varying by schema)	CS site-specific factor 2 (2004+ varying by schema)	Survival months flag	COD to site recode	% Persons below poverty ACS 2011-15	% Families below poverty ACS 2011-15	% Families below poverty ACS 2010-14	% Persons below poverty ACS 2010-14	% Families below poverty ACS 2009-13	% Persons below poverty ACS 2009-13	% Persons below poverty ACS 2007-11	% Families below poverty ACS 2007-11	Survival months	Year of diagnosis	Derived AJCC T, 7th ed (2010-2015)	Derived AJCC N, 7th ed (2010-2015)	Derived AJCC M, 7th ed (2010-2015)	Vital status recode (study cutoff used)
75-79 years	White	Female	Positive histology	Unknown	Liver	8170	Blank(s)	UNK Stage	Blank(s)	0	None	None; diagnosed at autopsy	Not recommended	Blank(s)	Blank(s)	Blank(s)	Blank(s)	Blank(s)	0	999	999	999	99	9	999	999	Incomplete dates are available and there cannot be zero days of follow-up	Liver	1085	781	766	1065	760	1053	988	715	24	2007	Blank(s)	Blank(s)	Blank(s)	Dead
45-49 years	Other (American Indian/AK Native, Asian/Pacific Islander)	Male	Positive histology	Unknown	Liver	8170	Blank(s)	Blank(s)	88	Blank(s)	Blank(s)	Blank(s)	Not recommended	Blank(s)	Blank(s)	Blank(s)	1	Blank(s)	0	Blank(s)	Blank(s)	Blank(s)	Blank(s)	Blank(s)	Blank(s)	Blank(s)	Complete dates are available and there are more than 0 days of survival	Liver	1085	781	766	1065	760	1053	988	715	1	1991	Blank(s)	Blank(s)	Blank(s)	Dead
80-84 years	White	Male	Positive histology	Unknown	Liver	8170	Blank(s)	Blank(s)	88	0	Blank(s)	Blank(s)	Not recommended	0	0	0	Blank(s)	Blank(s)	0	Blank(s)	Blank(s)	Blank(s)	Blank(s)	Blank(s)	Blank(s)	Blank(s)	Complete dates are available and there are more than 0 days of survival	Pancreas	1250	851	883	1288	861	1250	1179	819	1	1999	Blank(s)	Blank(s)	Blank(s)	Dead
80-84 years	White	Male	Radiography without microscopic confirm	Unknown	Liver	8170	Blank(s)	Blank(s)	88	0	Blank(s)	Blank(s)	Recommended but not performed, patient refused	0	0	0	Blank(s)	Blank(s)	0	Blank(s)	Blank(s)	Blank(s)	Blank(s)	Blank(s)	Blank(s)	Blank(s)	Complete dates are available and there are more than 0 days of survival	Other Digestive Organs	1085	781	766	1065	760	1053	988	715	4	2000	Blank(s)	Blank(s)	Blank(s)	Dead
55-59 years	White	Male	Positive histology	Unknown	Liver	8170	Blank(s)	Blank(s)	88	Blank(s)	Blank(s)	Blank(s)	Not recommended	Blank(s)	Blank(s)	Blank(s)	0	Blank(s)	0	Blank(s)	Blank(s)	Blank(s)	Blank(s)	Blank(s)	Blank(s)	Blank(s)	Complete dates are available and there are more than 0 days of survival	Liver	797	484	467	759	477	760	695	453	44	1996	Blank(s)	Blank(s)	Blank(s)	Dead
65-69 years	White	Male	Radiography without microscopic confirm	Unknown	Liver	8170	Blank(s)	Blank(s)	88	Blank(s)	Blank(s)	Blank(s)	Not recommended, contraindicated due to other cond; autopsy only (1973-2002)	Blank(s)	Blank(s)	Blank(s)	0	Blank(s)	0	Blank(s)	Blank(s)	Blank(s)	Blank(s)	Blank(s)	Blank(s)	Blank(s)	Incomplete dates are available and there cannot be zero days of follow-up	Liver	1324	776	784	1328	817	1346	1230	761	15	1997	Blank(s)	Blank(s)	Blank(s)	Dead
75-79 years	White	Male	Positive histology	Well differentiated; Grade I	Liver	8170	Blank(s)	Blank(s)	88	0	Blank(s)	Blank(s)	Not recommended	0	0	0	Blank(s)	Blank(s)	0	Blank(s)	Blank(s)	Blank(s)	Blank(s)	Blank(s)	Blank(s)	Blank(s)	Complete dates are available and there are more than 0 days of survival	Liver	1085	781	766	1065	760	1053	988	715	3	1999	Blank(s)	Blank(s)	Blank(s)	Dead
65-69 years	Other (American Indian/AK Native, Asian/Pacific Islander)	Female	Positive histology	Moderately differentiated; Grade II	Liver	8171	Blank(s)	Blank(s)	88	61	Blank(s)	Blank(s)	Surgery performed	0	0	0	Blank(s)	Blank(s)	0	Blank(s)	Blank(s)	Blank(s)	Blank(s)	Blank(s)	Blank(s)	Blank(s)	Complete dates are available and there are more than 0 days of survival	Alive	1085	781	766	1065	760	1053	988	715	218	1998	Blank(s)	Blank(s)	Blank(s)	Alive
55-59 years	White	Male	Positive histology	Well differentiated; Grade I	Liver	8170	Blank(s)	Blank(s)	88	0	Blank(s)	Blank(s)	Recommended but not performed, unknown reason	0	0	0	Blank(s)	Blank(s)	0	Blank(s)	Blank(s)	Blank(s)	Blank(s)	Blank(s)	Blank(s)	Blank(s)	Complete dates are available and there are more than 0 days of survival	Liver	1085	781	766	1065	760	1053	988	715	2	1998	Blank(s)	Blank(s)	Blank(s)	Dead
85+ years	Other (American Indian/AK Native, Asian/Pacific Islander)	Male	Positive histology	Unknown	Liver	8170	Blank(s)	Blank(s)	Blank(s)	0	None	None; diagnosed at autopsy	Not recommended	Blank(s)	Blank(s)	Blank(s)	Blank(s)	72	0	Blank(s)	Blank(s)	Blank(s)	Blank(s)	Blank(s)	20	999	Complete dates are available and there are more than 0 days of survival	Alive	1250	851	883	1288	861	1250	1179	819	2	2016	Blank(s)	Blank(s)	Blank(s)	Alive
80-84 years	White	Female	Positive histology	Unknown	Liver	8010	Blank(s)	Blank(s)	88	Blank(s)	Blank(s)	Blank(s)	Recommended but not performed, unknown reason	Blank(s)	Blank(s)	Blank(s)	2	Blank(s)	0	Blank(s)	Blank(s)	Blank(s)	Blank(s)	Blank(s)	Blank(s)	Blank(s)	Incomplete dates are available and there cannot be zero days of follow-up	Liver	1085	781	766	1065	760	1053	988	715	6	1989	Blank(s)	Blank(s)	Blank(s)	Dead
01-04 years	Black	Male	Positive histology	Well differentiated; Grade I	Liver	8970	Blank(s)	Blank(s)	88	Blank(s)	Blank(s)	Blank(s)	Unknown; death certificate; or autopsy only (2003+)	Blank(s)	Blank(s)	Blank(s)	9	Blank(s)	0	Blank(s)	Blank(s)	Blank(s)	Blank(s)	Blank(s)	Blank(s)	Blank(s)	Complete dates are available and there are more than 0 days of survival	Certain Conditions Originating in Perinatal Period	1085	781	766	1065	760	1053	988	715	18	1989	Blank(s)	Blank(s)	Blank(s)	Dead
75-79 years	White	Male	Positive histology	Well differentiated; Grade I	Liver	8170	Blank(s)	UNK Stage	Blank(s)	0	Unknown or not applicable	None; diagnosed at autopsy	Not recommended	Blank(s)	Blank(s)	Blank(s)	Blank(s)	Blank(s)	99	146	100	999	99	9	999	999	Complete dates are available and there are more than 0 days of survival	Aortic Aneurysm and Dissection	1085	781	766	1065	760	1053	988	715	1	2006	Blank(s)	Blank(s)	Blank(s)	Dead
60-64 years	White	Male	Positive exfoliative cytology, no positive histology	Unknown	Liver	8170	Blank(s)	Blank(s)	88	Blank(s)	Blank(s)	Blank(s)	Not recommended	Blank(s)	Blank(s)	Blank(s)	0	Blank(s)	0	Blank(s)	Blank(s)	Blank(s)	Blank(s)	Blank(s)	Blank(s)	Blank(s)	Complete dates are available and there are more than 0 days of survival	Liver	833	495	534	878	444	774	723	419	1	1993	Blank(s)	Blank(s)	Blank(s)	Dead
55-59 years	Black	Male	Positive histology	Unknown	Liver	8170	Blank(s)	Blank(s)	88	0	Blank(s)	Blank(s)	Not recommended	0	0	0	Blank(s)	Blank(s)	0	Blank(s)	Blank(s)	Blank(s)	Blank(s)	Blank(s)	Blank(s)	Blank(s)	Complete dates are available and there are more than 0 days of survival	Liver	1085	781	766	1065	760	1053	988	715	2	2000	Blank(s)	Blank(s)	Blank(s)	Dead
70-74 years	White	Male	Positive histology	Moderately differentiated; Grade II	Liver	8170	Blank(s)	IV	Blank(s)	21	None	None; diagnosed at autopsy	Surgery performed	Blank(s)	Blank(s)	Blank(s)	Blank(s)	Blank(s)	0	65	100	0	40	6	10	0	Complete dates are available and there are more than 0 days of survival	Liver	833	495	534	878	444	774	723	419	14	2005	Blank(s)	Blank(s)	Blank(s)	Dead
50-54 years	Other (American Indian/AK Native, Asian/Pacific Islander)	Female	Radiography without microscopic confirm	Unknown	Liver	8170	Blank(s)	Blank(s)	88	0	Blank(s)	Blank(s)	Not recommended	0	0	0	Blank(s)	Blank(s)	0	Blank(s)	Blank(s)	Blank(s)	Blank(s)	Blank(s)	Blank(s)	Blank(s)	Complete dates are available and there are more than 0 days of survival	State DC not available or state DC available but no COD	1085	781	766	1065	760	1053	988	715	7	2001	Blank(s)	Blank(s)	Blank(s)	Dead
50-54 years	White	Male	Positive histology	Well differentiated; Grade I	Liver	8170	Blank(s)	Blank(s)	88	10	Blank(s)	Blank(s)	Surgery performed	0	0	0	Blank(s)	Blank(s)	0	Blank(s)	Blank(s)	Blank(s)	Blank(s)	Blank(s)	Blank(s)	Blank(s)	Complete dates are available and there are more than 0 days of survival	Liver	797	484	467	759	477	760	695	453	20	2001	Blank(s)	Blank(s)	Blank(s)	Dead
60-64 years	White	Male	Radiography without microscopic confirm	Moderately differentiated; Grade II	Liver	8170	Blank(s)	Blank(s)	88	61	Blank(s)	Blank(s)	Surgery performed	0	0	0	Blank(s)	Blank(s)	0	Blank(s)	Blank(s)	Blank(s)	Blank(s)	Blank(s)	Blank(s)	Blank(s)	Complete dates are available and there are more than 0 days of survival	Other Cause of Death	1324	776	784	1328	817	1346	1230	761	89	2001	Blank(s)	Blank(s)	Blank(s)	Dead
65-69 years	White	Male	Positive histology	Well differentiated; Grade I	Liver	8170	Blank(s)	Blank(s)	88	16	Blank(s)	Blank(s)	Surgery performed	0	0	0	Blank(s)	Blank(s)	0	Blank(s)	Blank(s)	Blank(s)	Blank(s)	Blank(s)	Blank(s)	Blank(s)	Complete dates are available and there are more than 0 days of survival	Liver	1250	851	883	1288	861	1250	1179	819	28	2001	Blank(s)	Blank(s)	Blank(s)	Dead
65-69 years	White	Male	Positive histology	Unknown	Liver	8170	Blank(s)	Blank(s)	88	16	Blank(s)	Blank(s)	Surgery performed	0	0	0	Blank(s)	Blank(s)	0	Blank(s)	Blank(s)	Blank(s)	Blank(s)	Blank(s)	Blank(s)	Blank(s)	Complete dates are available and there are more than 0 days of survival	Liver	1085	781	766	1065	760	1053	988	715	31	1999	Blank(s)	Blank(s)	Blank(s)	Dead
55-59 years	White	Male	Positive histology	Unknown	Liver	8170	Blank(s)	Blank(s)	88	0	Blank(s)	Blank(s)	Not recommended	0	0	0	Blank(s)	Blank(s)	0	Blank(s)	Blank(s)	Blank(s)	Blank(s)	Blank(s)	Blank(s)	Blank(s)	Complete dates are available and there are more than 0 days of survival	Lung and Bronchus	1250	851	883	1288	861	1250	1179	819	38	2000	Blank(s)	Blank(s)	Blank(s)	Dead
80-84 years	Other (American Indian/AK Native, Asian/Pacific Islander)	Female	Positive histology	Unknown	Liver	8170	Blank(s)	Blank(s)	88	Blank(s)	Blank(s)	Blank(s)	Not recommended	Blank(s)	Blank(s)	Blank(s)	0	Blank(s)	0	Blank(s)	Blank(s)	Blank(s)	Blank(s)	Blank(s)	Blank(s)	Blank(s)	Complete dates are available and there are more than 0 days of survival	State DC not available or state DC available but no COD	833	495	534	878	444	774	723	419	74	1995	Blank(s)	Blank(s)	Blank(s)	Dead
80-84 years	White	Female	Radiography without microscopic confirm	Unknown	Liver	8170	II	II	Blank(s)	0	None	None; diagnosed at autopsy	Not recommended	Blank(s)	Blank(s)	Blank(s)	Blank(s)	Blank(s)	0	104	350	0	0	0	10	999	Complete dates are available and there are more than 0 days of survival	Other Biliary	1250	851	883	1288	861	1250	1179	819	9	2013	T2	N0	M0	Dead
65-69 years	White	Male	Radiography without microscopic confirm	Unknown	Liver	8170	I	I	Blank(s)	16	None	None; diagnosed at autopsy	Surgery performed	Blank(s)	Blank(s)	Blank(s)	Blank(s)	Blank(s)	0	14	170	0	0	0	999	1	Incomplete dates are available and there cannot be zero days of follow-up	Alive	1250	851	883	1288	861	1250	1179	819	38	2013	T1	N0	M0	Alive
60-64 years	White	Male	Positive histology	Moderately differentiated; Grade II	Liver	8170	Blank(s)	II	Blank(s)	60	None	None; diagnosed at autopsy	Surgery performed	Blank(s)	Blank(s)	Blank(s)	Blank(s)	Blank(s)	0	35	350	0	0	1	10	0	Complete dates are available and there are more than 0 days of survival	Miscellaneous Malignant Cancer	833	495	534	878	444	774	723	419	48	2008	Blank(s)	Blank(s)	Blank(s)	Dead
80-84 years	Other (American Indian/AK Native, Asian/Pacific Islander)	Female	Positive histology	Unknown	Liver	8174	Blank(s)	Blank(s)	88	0	None	None; diagnosed at autopsy	Not recommended	Blank(s)	Blank(s)	Blank(s)	Blank(s)	Blank(s)	0	Blank(s)	Blank(s)	Blank(s)	Blank(s)	Blank(s)	Blank(s)	Blank(s)	Complete dates are available and there are more than 0 days of survival	Liver	797	484	467	759	477	760	695	453	10	2003	Blank(s)	Blank(s)	Blank(s)	Dead
60-64 years	Other (American Indian/AK Native, Asian/Pacific Islander)	Male	Positive histology	Unknown	Liver	8170	Blank(s)	Blank(s)	88	Blank(s)	Blank(s)	Blank(s)	Not recommended	Blank(s)	Blank(s)	Blank(s)	1	Blank(s)	0	Blank(s)	Blank(s)	Blank(s)	Blank(s)	Blank(s)	Blank(s)	Blank(s)	Complete dates are available and there are more than 0 days of survival	Liver	1250	851	883	1288	861	1250	1179	819	28	1995	Blank(s)	Blank(s)	Blank(s)	Dead
70-74 years	White	Male	Positive histology	Unknown	Liver	8170	Blank(s)	Blank(s)	88	Blank(s)	Blank(s)	Blank(s)	Not recommended	Blank(s)	Blank(s)	Blank(s)	2	Blank(s)	0	Blank(s)	Blank(s)	Blank(s)	Blank(s)	Blank(s)	Blank(s)	Blank(s)	Complete dates are available and there are more than 0 days of survival	State DC not available or state DC available but no COD	797	484	467	759	477	760	695	453	67	1995	Blank(s)	Blank(s)	Blank(s)	Dead
40-44 years	White	Male	Unknown	Unknown	Liver	8170	Blank(s)	UNK Stage	Blank(s)	0	None	None; diagnosed at autopsy	Not recommended	Blank(s)	Blank(s)	Blank(s)	Blank(s)	Blank(s)	0	999	999	999	0	0	999	999	Incomplete dates are available and there cannot be zero days of follow-up	Liver	1324	776	784	1328	817	1346	1230	761	11	2004	Blank(s)	Blank(s)	Blank(s)	Dead
70-74 years	Black	Male	Positive exfoliative cytology, no positive histology	Unknown	Liver	8170	Blank(s)	Blank(s)	88	Blank(s)	Blank(s)	Blank(s)	Not recommended	Blank(s)	Blank(s)	Blank(s)	0	Blank(s)	0	Blank(s)	Blank(s)	Blank(s)	Blank(s)	Blank(s)	Blank(s)	Blank(s)	Complete dates are available and there are more than 0 days of survival	Chronic Obstructive Pulmonary Disease and Allied Cond	1324	776	784	1328	817	1346	1230	761	16	1992	Blank(s)	Blank(s)	Blank(s)	Dead
80-84 years	White	Female	Clinical diagnosis only	Unknown	Liver	8170	Blank(s)	UNK Stage	Blank(s)	0	None	None; diagnosed at autopsy	Not recommended	Blank(s)	Blank(s)	Blank(s)	Blank(s)	Blank(s)	0	40	999	999	99	9	10	999	Incomplete dates are available and there cannot be zero days of follow-up	Other Infectious and Parasitic Diseases including HIV	1324	776	784	1328	817	1346	1230	761	1	2008	Blank(s)	Blank(s)	Blank(s)	Dead
65-69 years	White	Female	Positive histology	Unknown	Liver	8170	Blank(s)	IIIA	Blank(s)	0	None	None; diagnosed at autopsy	Not recommended	Blank(s)	Blank(s)	Blank(s)	Blank(s)	Blank(s)	0	70	630	0	0	0	10	999	Complete dates are available and there are more than 0 days of survival	Liver	833	495	534	878	444	774	723	419	0	2009	Blank(s)	Blank(s)	Blank(s)	Dead
65-69 years	Black	Female	Positive histology	Unknown	Liver	8170	Blank(s)	Blank(s)	88	0	Blank(s)	Blank(s)	Not recommended	0	0	0	Blank(s)	Blank(s)	0	Blank(s)	Blank(s)	Blank(s)	Blank(s)	Blank(s)	Blank(s)	Blank(s)	Complete dates are available and there are more than 0 days of survival	Liver	1324	776	784	1328	817	1346	1230	761	21	2001	Blank(s)	Blank(s)	Blank(s)	Dead
70-74 years	White	Male	Positive histology	Unknown	Liver	8170	Blank(s)	Blank(s)	Blank(s)	Blank(s)	Blank(s)	Blank(s)	Recommended but not performed, unknown reason	Blank(s)	Blank(s)	Blank(s)	9	Blank(s)	Blank(s)	Blank(s)	Blank(s)	Blank(s)	Blank(s)	Blank(s)	Blank(s)	Blank(s)	Complete dates are available and there are more than 0 days of survival	Liver	1085	781	766	1065	760	1053	988	715	3	1984	Blank(s)	Blank(s)	Blank(s)	Dead
70-74 years	White	Male	Positive exfoliative cytology, no positive histology	Moderately differentiated; Grade II	Liver	8170	Blank(s)	Blank(s)	88	0	None	None; diagnosed at autopsy	Not recommended	Blank(s)	Blank(s)	Blank(s)	Blank(s)	Blank(s)	0	Blank(s)	Blank(s)	Blank(s)	Blank(s)	Blank(s)	Blank(s)	Blank(s)	Complete dates are available and there are more than 0 days of survival	Colon excluding Rectum	1324	776	784	1328	817	1346	1230	761	0	2003	Blank(s)	Blank(s)	Blank(s)	Dead
65-69 years	Other (American Indian/AK Native, Asian/Pacific Islander)	Female	Positive histology	Moderately differentiated; Grade II	Liver	8170	Blank(s)	Blank(s)	Blank(s)	Blank(s)	Blank(s)	Blank(s)	Surgery performed	Blank(s)	Blank(s)	Blank(s)	90	Blank(s)	Blank(s)	Blank(s)	Blank(s)	Blank(s)	Blank(s)	Blank(s)	Blank(s)	Blank(s)	Complete dates are available and there are more than 0 days of survival	Other Infectious and Parasitic Diseases including HIV	1324	776	784	1328	817	1346	1230	761	169	1980	Blank(s)	Blank(s)	Blank(s)	Dead
55-59 years	White	Male	Positive histology	Unknown	Liver	8170	Blank(s)	Blank(s)	Blank(s)	Blank(s)	Blank(s)	Blank(s)	Recommended but not performed, unknown reason	Blank(s)	Blank(s)	Blank(s)	9	Blank(s)	Blank(s)	Blank(s)	Blank(s)	Blank(s)	Blank(s)	Blank(s)	Blank(s)	Blank(s)	Complete dates are available and there are more than 0 days of survival	Liver	1250	851	883	1288	861	1250	1179	819	4	1976	Blank(s)	Blank(s)	Blank(s)	Dead
60-64 years	White	Male	Positive histology	Unknown	Liver	8170	Blank(s)	Blank(s)	Blank(s)	Blank(s)	Blank(s)	Blank(s)	Recommended but not performed, unknown reason	Blank(s)	Blank(s)	Blank(s)	9	Blank(s)	Blank(s)	Blank(s)	Blank(s)	Blank(s)	Blank(s)	Blank(s)	Blank(s)	Blank(s)	Complete dates are available and there are more than 0 days of survival	Liver	1250	851	883	1288	861	1250	1179	819	0	1976	Blank(s)	Blank(s)	Blank(s)	Dead
50-54 years	White	Female	Positive histology	Unknown	BileDuctsIntraHepat	8180	Blank(s)	Blank(s)	Blank(s)	Blank(s)	Blank(s)	Blank(s)	Surgery performed	Blank(s)	Blank(s)	Blank(s)	90	Blank(s)	Blank(s)	Blank(s)	Blank(s)	Blank(s)	Blank(s)	Blank(s)	Blank(s)	Blank(s)	Complete dates are available and there are more than 0 days of survival	Liver	1085	781	766	1065	760	1053	988	715	13	1979	Blank(s)	Blank(s)	Blank(s)	Dead
60-64 years	White	Female	Unknown	Unknown	Liver	8010	Blank(s)	Blank(s)	Blank(s)	Blank(s)	Blank(s)	Blank(s)	Unknown; death certificate; or autopsy only (2003+)	Blank(s)	Blank(s)	Blank(s)	9	Blank(s)	Blank(s)	Blank(s)	Blank(s)	Blank(s)	Blank(s)	Blank(s)	Blank(s)	Blank(s)	Not calculated because a Death Certificate Only or Autopsy Only case	Cerebrovascular Diseases	1085	781	766	1065	760	1053	988	715	Unknown	1975	Blank(s)	Blank(s)	Blank(s)	Dead
65-69 years	White	Male	Positive histology	Unknown	Liver	8010	Blank(s)	Blank(s)	Blank(s)	Blank(s)	Blank(s)	Blank(s)	Recommended but not performed, unknown reason	Blank(s)	Blank(s)	Blank(s)	9	Blank(s)	Blank(s)	Blank(s)	Blank(s)	Blank(s)	Blank(s)	Blank(s)	Blank(s)	Blank(s)	Complete dates are available and there are more than 0 days of survival	Liver	1324	776	784	1328	817	1346	1230	761	0	1979	Blank(s)	Blank(s)	Blank(s)	Dead
55-59 years	White	Female	Positive histology	Unknown	Liver	8170	Blank(s)	Blank(s)	Blank(s)	Blank(s)	Blank(s)	Blank(s)	Recommended but not performed, unknown reason	Blank(s)	Blank(s)	Blank(s)	9	Blank(s)	Blank(s)	Blank(s)	Blank(s)	Blank(s)	Blank(s)	Blank(s)	Blank(s)	Blank(s)	Complete dates are available and there are more than 0 days of survival	Miscellaneous Malignant Cancer	1250	851	883	1288	861	1250	1179	819	0	1977	Blank(s)	Blank(s)	Blank(s)	Dead
50-54 years	White	Female	Unknown	Unknown	Liver	8010	Blank(s)	Blank(s)	Blank(s)	Blank(s)	Blank(s)	Blank(s)	Unknown; death certificate; or autopsy only (2003+)	Blank(s)	Blank(s)	Blank(s)	9	Blank(s)	Blank(s)	Blank(s)	Blank(s)	Blank(s)	Blank(s)	Blank(s)	Blank(s)	Blank(s)	Not calculated because a Death Certificate Only or Autopsy Only case	Liver	1324	776	784	1328	817	1346	1230	761	Unknown	1979	Blank(s)	Blank(s)	Blank(s)	Dead
70-74 years	Other (American Indian/AK Native, Asian/Pacific Islander)	Male	Positive histology	Moderately differentiated; Grade II	Liver	8170	Blank(s)	Blank(s)	Blank(s)	Blank(s)	Blank(s)	Blank(s)	Surgery performed	Blank(s)	Blank(s)	Blank(s)	90	Blank(s)	Blank(s)	Blank(s)	Blank(s)	Blank(s)	Blank(s)	Blank(s)	Blank(s)	Blank(s)	Complete dates are available and there are more than 0 days of survival	Cerebrovascular Diseases	1250	851	883	1288	861	1250	1179	819	54	1980	Blank(s)	Blank(s)	Blank(s)	Dead
80-84 years	Other (American Indian/AK Native, Asian/Pacific Islander)	Male	Positive histology	Poorly differentiated; Grade III	Liver	8170	Blank(s)	Blank(s)	Blank(s)	Blank(s)	Blank(s)	Blank(s)	Recommended but not performed, unknown reason	Blank(s)	Blank(s)	Blank(s)	9	Blank(s)	Blank(s)	Blank(s)	Blank(s)	Blank(s)	Blank(s)	Blank(s)	Blank(s)	Blank(s)	Complete dates are available and there are more than 0 days of survival	Liver	1324	776	784	1328	817	1346	1230	761	1	1979	Blank(s)	Blank(s)	Blank(s)	Dead
80-84 years	White	Male	Positive exfoliative cytology, no positive histology	Poorly differentiated; Grade III	Liver	8170	Blank(s)	Blank(s)	88	Blank(s)	Blank(s)	Blank(s)	Not recommended	Blank(s)	Blank(s)	Blank(s)	0	Blank(s)	0	Blank(s)	Blank(s)	Blank(s)	Blank(s)	Blank(s)	Blank(s)	Blank(s)	Complete dates are available and there are more than 0 days of survival	Liver	1324	776	784	1328	817	1346	1230	761	3	1996	Blank(s)	Blank(s)	Blank(s)	Dead
80-84 years	White	Female	Positive histology	Unknown	BileDuctsIntraHepat	8180	Blank(s)	Blank(s)	Blank(s)	Blank(s)	Blank(s)	Blank(s)	Recommended but not performed, unknown reason	Blank(s)	Blank(s)	Blank(s)	9	Blank(s)	Blank(s)	Blank(s)	Blank(s)	Blank(s)	Blank(s)	Blank(s)	Blank(s)	Blank(s)	Complete dates are available and there are more than 0 days of survival	Intrahepatic Bile Duct	1324	776	784	1328	817	1346	1230	761	2	1976	Blank(s)	Blank(s)	Blank(s)	Dead
55-59 years	White	Male	Positive histology	Unknown	Liver	8170	Blank(s)	Blank(s)	Blank(s)	Blank(s)	Blank(s)	Blank(s)	Recommended but not performed, unknown reason	Blank(s)	Blank(s)	Blank(s)	9	Blank(s)	Blank(s)	Blank(s)	Blank(s)	Blank(s)	Blank(s)	Blank(s)	Blank(s)	Blank(s)	Complete dates are available and there are more than 0 days of survival	Chronic Liver Disease and Cirrhosis	797	484	467	759	477	760	695	453	0	1976	Blank(s)	Blank(s)	Blank(s)	Dead
85+ years	White	Male	Radiography without microscopic confirm	Unknown	Liver	8170	Blank(s)	Blank(s)	Blank(s)	Blank(s)	Blank(s)	Blank(s)	Recommended but not performed, unknown reason	Blank(s)	Blank(s)	Blank(s)	9	Blank(s)	Blank(s)	Blank(s)	Blank(s)	Blank(s)	Blank(s)	Blank(s)	Blank(s)	Blank(s)	Complete dates are available and there are more than 0 days of survival	Liver	797	484	467	759	477	760	695	453	1	1976	Blank(s)	Blank(s)	Blank(s)	Dead
80-84 years	Other (American Indian/AK Native, Asian/Pacific Islander)	Male	Positive histology	Unknown	Liver	8170	Blank(s)	Blank(s)	Blank(s)	Blank(s)	Blank(s)	Blank(s)	Recommended but not performed, unknown reason	Blank(s)	Blank(s)	Blank(s)	9	Blank(s)	Blank(s)	Blank(s)	Blank(s)	Blank(s)	Blank(s)	Blank(s)	Blank(s)	Blank(s)	Complete dates are available and there are more than 0 days of survival	Liver	1324	776	784	1328	817	1346	1230	761	21	1978	Blank(s)	Blank(s)	Blank(s)	Dead
60-64 years	Other (American Indian/AK Native, Asian/Pacific Islander)	Male	Radiography without microscopic confirm	Unknown	Liver	8170	Blank(s)	Blank(s)	Blank(s)	Blank(s)	Blank(s)	Blank(s)	Recommended but not performed, unknown reason	Blank(s)	Blank(s)	Blank(s)	9	Blank(s)	Blank(s)	Blank(s)	Blank(s)	Blank(s)	Blank(s)	Blank(s)	Blank(s)	Blank(s)	Complete dates are available and there are more than 0 days of survival	Liver	1324	776	784	1328	817	1346	1230	761	1	1978	Blank(s)	Blank(s)	Blank(s)	Dead
65-69 years	Other (American Indian/AK Native, Asian/Pacific Islander)	Female	Positive histology	Unknown	Liver	8170	Blank(s)	Blank(s)	Blank(s)	Blank(s)	Blank(s)	Blank(s)	Recommended but not performed, unknown reason	Blank(s)	Blank(s)	Blank(s)	9	Blank(s)	Blank(s)	Blank(s)	Blank(s)	Blank(s)	Blank(s)	Blank(s)	Blank(s)	Blank(s)	Complete dates are available and there are more than 0 days of survival	Liver	1324	776	784	1328	817	1346	1230	761	1	1982	Blank(s)	Blank(s)	Blank(s)	Dead
65-69 years	Black	Female	Positive histology	Unknown	Liver	8170	Blank(s)	Blank(s)	Blank(s)	Blank(s)	Blank(s)	Blank(s)	Recommended but not performed, unknown reason	Blank(s)	Blank(s)	Blank(s)	9	Blank(s)	Blank(s)	Blank(s)	Blank(s)	Blank(s)	Blank(s)	Blank(s)	Blank(s)	Blank(s)	Complete dates are available and there are more than 0 days of survival	Liver	1324	776	784	1328	817	1346	1230	761	0	1975	Blank(s)	Blank(s)	Blank(s)	Dead
80-84 years	White	Female	Radiography without microscopic confirm	Unknown	Liver	8170	Blank(s)	Blank(s)	88	Blank(s)	Blank(s)	Blank(s)	Not recommended	Blank(s)	Blank(s)	Blank(s)	0	Blank(s)	0	Blank(s)	Blank(s)	Blank(s)	Blank(s)	Blank(s)	Blank(s)	Blank(s)	Complete dates are available and there are more than 0 days of survival	Liver	797	484	467	759	477	760	695	453	0	1996	Blank(s)	Blank(s)	Blank(s)	Dead
75-79 years	White	Male	Positive histology	Unknown	Liver	8170	Blank(s)	Blank(s)	Blank(s)	Blank(s)	Blank(s)	Blank(s)	Recommended but not performed, unknown reason	Blank(s)	Blank(s)	Blank(s)	9	Blank(s)	Blank(s)	Blank(s)	Blank(s)	Blank(s)	Blank(s)	Blank(s)	Blank(s)	Blank(s)	Complete dates are available and there are 0 days of survival	Prostate	1250	851	883	1288	861	1250	1179	819	0	1976	Blank(s)	Blank(s)	Blank(s)	Dead
65-69 years	White	Female	Positive histology	Undifferentiated; anaplastic; Grade IV	Liver	8021	Blank(s)	Blank(s)	Blank(s)	Blank(s)	Blank(s)	Blank(s)	Recommended but not performed, unknown reason	Blank(s)	Blank(s)	Blank(s)	9	Blank(s)	Blank(s)	Blank(s)	Blank(s)	Blank(s)	Blank(s)	Blank(s)	Blank(s)	Blank(s)	Complete dates are available and there are more than 0 days of survival	Liver	1250	851	883	1288	861	1250	1179	819	15	1976	Blank(s)	Blank(s)	Blank(s)	Dead
75-79 years	White	Male	Positive histology	Unknown	BileDuctsIntraHepat	8180	Blank(s)	Blank(s)	Blank(s)	Blank(s)	Blank(s)	Blank(s)	Recommended but not performed, unknown reason	Blank(s)	Blank(s)	Blank(s)	9	Blank(s)	Blank(s)	Blank(s)	Blank(s)	Blank(s)	Blank(s)	Blank(s)	Blank(s)	Blank(s)	Complete dates are available and there are more than 0 days of survival	Miscellaneous Malignant Cancer	1324	776	784	1328	817	1346	1230	761	1	1976	Blank(s)	Blank(s)	Blank(s)	Dead
75-79 years	White	Male	Positive histology	Unknown	Liver	8170	Blank(s)	Blank(s)	Blank(s)	Blank(s)	Blank(s)	Blank(s)	Recommended but not performed, unknown reason	Blank(s)	Blank(s)	Blank(s)	9	Blank(s)	Blank(s)	Blank(s)	Blank(s)	Blank(s)	Blank(s)	Blank(s)	Blank(s)	Blank(s)	Complete dates are available and there are more than 0 days of survival	Colon excluding Rectum	833	495	534	878	444	774	723	419	0	1979	Blank(s)	Blank(s)	Blank(s)	Dead
65-69 years	Black	Female	Positive histology	Moderately differentiated; Grade II	Liver	8170	I	I	Blank(s)	23	None	None; diagnosed at autopsy	Surgery performed	Blank(s)	Blank(s)	Blank(s)	Blank(s)	Blank(s)	0	35	170	0	0	0	10	999	Complete dates are available and there are more than 0 days of survival	Alive	1324	776	784	1328	817	1346	1230	761	38	2013	T1	N0	M0	Alive
50-54 years	Black	Female	Positive histology	Unknown	Liver	8140	Blank(s)	Blank(s)	Blank(s)	Blank(s)	Blank(s)	Blank(s)	Recommended but not performed, unknown reason	Blank(s)	Blank(s)	Blank(s)	9	Blank(s)	Blank(s)	Blank(s)	Blank(s)	Blank(s)	Blank(s)	Blank(s)	Blank(s)	Blank(s)	Complete dates are available and there are more than 0 days of survival	Liver	1250	851	883	1288	861	1250	1179	819	29	1987	Blank(s)	Blank(s)	Blank(s)	Dead
60-64 years	Other (American Indian/AK Native, Asian/Pacific Islander)	Male	Radiography without microscopic confirm	Unknown	Liver	8170	Blank(s)	Blank(s)	Blank(s)	Blank(s)	Blank(s)	Blank(s)	Recommended but not performed, unknown reason	Blank(s)	Blank(s)	Blank(s)	9	Blank(s)	Blank(s)	Blank(s)	Blank(s)	Blank(s)	Blank(s)	Blank(s)	Blank(s)	Blank(s)	Complete dates are available and there are more than 0 days of survival	Alive	1324	776	784	1328	817	1346	1230	761	142	1979	Blank(s)	Blank(s)	Blank(s)	Alive
50-54 years	White	Male	Positive histology	Unknown	Liver	8170	Blank(s)	Blank(s)	Blank(s)	Blank(s)	Blank(s)	Blank(s)	Recommended but not performed, unknown reason	Blank(s)	Blank(s)	Blank(s)	9	Blank(s)	Blank(s)	Blank(s)	Blank(s)	Blank(s)	Blank(s)	Blank(s)	Blank(s)	Blank(s)	Incomplete dates are available and there cannot be zero days of follow-up	State DC not available or state DC available but no COD	1250	851	883	1288	861	1250	1179	819	2	1975	Blank(s)	Blank(s)	Blank(s)	Dead
50-54 years	Black	Female	Positive histology	Unknown	Liver	8170	Blank(s)	Blank(s)	Blank(s)	Blank(s)	Blank(s)	Blank(s)	Recommended but not performed, unknown reason	Blank(s)	Blank(s)	Blank(s)	9	Blank(s)	Blank(s)	Blank(s)	Blank(s)	Blank(s)	Blank(s)	Blank(s)	Blank(s)	Blank(s)	Complete dates are available and there are more than 0 days of survival	Liver	1324	776	784	1328	817	1346	1230	761	1	1979	Blank(s)	Blank(s)	Blank(s)	Dead
85+ years	White	Male	Positive exfoliative cytology, no positive histology	Unknown	Liver	8170	Blank(s)	Blank(s)	88	Blank(s)	Blank(s)	Blank(s)	Not recommended	Blank(s)	Blank(s)	Blank(s)	1	Blank(s)	99	Blank(s)	Blank(s)	Blank(s)	Blank(s)	Blank(s)	Blank(s)	Blank(s)	Complete dates are available and there are more than 0 days of survival	Liver	1324	776	784	1328	817	1346	1230	761	2	1988	Blank(s)	Blank(s)	Blank(s)	Dead
80-84 years	White	Female	Radiography without microscopic confirm	Unknown	Liver	8170	Blank(s)	Blank(s)	88	Blank(s)	Blank(s)	Blank(s)	Not recommended	Blank(s)	Blank(s)	Blank(s)	0	Blank(s)	0	Blank(s)	Blank(s)	Blank(s)	Blank(s)	Blank(s)	Blank(s)	Blank(s)	Complete dates are available and there are more than 0 days of survival	Liver	1250	851	883	1288	861	1250	1179	819	4	1995	Blank(s)	Blank(s)	Blank(s)	Dead
70-74 years	Other (American Indian/AK Native, Asian/Pacific Islander)	Male	Clinical diagnosis only	Unknown	Liver	8170	Blank(s)	Blank(s)	Blank(s)	Blank(s)	Blank(s)	Blank(s)	Recommended but not performed, unknown reason	Blank(s)	Blank(s)	Blank(s)	9	Blank(s)	Blank(s)	Blank(s)	Blank(s)	Blank(s)	Blank(s)	Blank(s)	Blank(s)	Blank(s)	Incomplete dates are available and there cannot be zero days of follow-up	State DC not available or state DC available but no COD	1324	776	784	1328	817	1346	1230	761	0	1976	Blank(s)	Blank(s)	Blank(s)	Dead
75-79 years	White	Male	Positive histology	Unknown	Liver	8170	Blank(s)	Blank(s)	Blank(s)	Blank(s)	Blank(s)	Blank(s)	Recommended but not performed, unknown reason	Blank(s)	Blank(s)	Blank(s)	9	Blank(s)	Blank(s)	Blank(s)	Blank(s)	Blank(s)	Blank(s)	Blank(s)	Blank(s)	Blank(s)	Complete dates are available and there are more than 0 days of survival	Liver	1324	776	784	1328	817	1346	1230	761	0	1975	Blank(s)	Blank(s)	Blank(s)	Dead
60-64 years	Black	Male	Positive histology	Unknown	Liver	8170	Blank(s)	Blank(s)	Blank(s)	Blank(s)	Blank(s)	Blank(s)	Recommended but not performed, unknown reason	Blank(s)	Blank(s)	Blank(s)	9	Blank(s)	Blank(s)	Blank(s)	Blank(s)	Blank(s)	Blank(s)	Blank(s)	Blank(s)	Blank(s)	Complete dates are available and there are more than 0 days of survival	Pneumonia and Influenza	1324	776	784	1328	817	1346	1230	761	8	1980	Blank(s)	Blank(s)	Blank(s)	Dead
60-64 years	White	Female	Positive histology	Poorly differentiated; Grade III	Liver	8170	Blank(s)	Blank(s)	Blank(s)	Blank(s)	Blank(s)	Blank(s)	Recommended but not performed, unknown reason	Blank(s)	Blank(s)	Blank(s)	9	Blank(s)	Blank(s)	Blank(s)	Blank(s)	Blank(s)	Blank(s)	Blank(s)	Blank(s)	Blank(s)	Complete dates are available and there are more than 0 days of survival	Liver	1085	781	766	1065	760	1053	988	715	2	1980	Blank(s)	Blank(s)	Blank(s)	Dead
60-64 years	White	Male	Positive histology	Unknown	Liver	8170	Blank(s)	Blank(s)	Blank(s)	Blank(s)	Blank(s)	Blank(s)	Recommended but not performed, unknown reason	Blank(s)	Blank(s)	Blank(s)	9	Blank(s)	Blank(s)	Blank(s)	Blank(s)	Blank(s)	Blank(s)	Blank(s)	Blank(s)	Blank(s)	Incomplete dates are available and there cannot be zero days of follow-up	Liver	1324	776	784	1328	817	1346	1230	761	3	1980	Blank(s)	Blank(s)	Blank(s)	Dead
45-49 years	White	Male	Positive histology	Undifferentiated; anaplastic; Grade IV	Liver	8170	Blank(s)	Blank(s)	Blank(s)	Blank(s)	Blank(s)	Blank(s)	Recommended but not performed, unknown reason	Blank(s)	Blank(s)	Blank(s)	9	Blank(s)	Blank(s)	Blank(s)	Blank(s)	Blank(s)	Blank(s)	Blank(s)	Blank(s)	Blank(s)	Complete dates are available and there are more than 0 days of survival	Chronic Liver Disease and Cirrhosis	1250	851	883	1288	861	1250	1179	819	0	1976	Blank(s)	Blank(s)	Blank(s)	Dead
70-74 years	White	Male	Positive histology	Unknown	Liver	8170	Blank(s)	Blank(s)	Blank(s)	Blank(s)	Blank(s)	Blank(s)	Recommended but not performed, unknown reason	Blank(s)	Blank(s)	Blank(s)	9	Blank(s)	Blank(s)	Blank(s)	Blank(s)	Blank(s)	Blank(s)	Blank(s)	Blank(s)	Blank(s)	Complete dates are available and there are more than 0 days of survival	Liver	1250	851	883	1288	861	1250	1179	819	1	1975	Blank(s)	Blank(s)	Blank(s)	Dead
70-74 years	White	Female	Positive histology	Unknown	Liver	8170	Blank(s)	Blank(s)	Blank(s)	Blank(s)	Blank(s)	Blank(s)	Recommended but not performed, unknown reason	Blank(s)	Blank(s)	Blank(s)	9	Blank(s)	Blank(s)	Blank(s)	Blank(s)	Blank(s)	Blank(s)	Blank(s)	Blank(s)	Blank(s)	Complete dates are available and there are more than 0 days of survival	Liver	1324	776	784	1328	817	1346	1230	761	0	1976	Blank(s)	Blank(s)	Blank(s)	Dead
80-84 years	White	Female	Positive histology	Unknown	Liver	8480	Blank(s)	Blank(s)	Blank(s)	Blank(s)	Blank(s)	Blank(s)	Recommended but not performed, unknown reason	Blank(s)	Blank(s)	Blank(s)	9	Blank(s)	Blank(s)	Blank(s)	Blank(s)	Blank(s)	Blank(s)	Blank(s)	Blank(s)	Blank(s)	Complete dates are available and there are more than 0 days of survival	Liver	1250	851	883	1288	861	1250	1179	819	2	1975	Blank(s)	Blank(s)	Blank(s)	Dead
65-69 years	White	Male	Radiography without microscopic confirm	Unknown	Liver	8170	Blank(s)	Blank(s)	Blank(s)	Blank(s)	Blank(s)	Blank(s)	Recommended but not performed, unknown reason	Blank(s)	Blank(s)	Blank(s)	9	Blank(s)	Blank(s)	Blank(s)	Blank(s)	Blank(s)	Blank(s)	Blank(s)	Blank(s)	Blank(s)	Complete dates are available and there are more than 0 days of survival	Miscellaneous Malignant Cancer	1085	781	766	1065	760	1053	988	715	0	1976	Blank(s)	Blank(s)	Blank(s)	Dead
70-74 years	White	Female	Positive histology	Unknown	Liver	8170	Blank(s)	Blank(s)	Blank(s)	Blank(s)	Blank(s)	Blank(s)	Surgery performed	Blank(s)	Blank(s)	Blank(s)	90	Blank(s)	Blank(s)	Blank(s)	Blank(s)	Blank(s)	Blank(s)	Blank(s)	Blank(s)	Blank(s)	Complete dates are available and there are more than 0 days of survival	Liver	1085	781	766	1065	760	1053	988	715	5	1976	Blank(s)	Blank(s)	Blank(s)	Dead
75-79 years	White	Male	Positive histology	Unknown	Liver	8170	Blank(s)	Blank(s)	Blank(s)	Blank(s)	Blank(s)	Blank(s)	Recommended but not performed, unknown reason	Blank(s)	Blank(s)	Blank(s)	9	Blank(s)	Blank(s)	Blank(s)	Blank(s)	Blank(s)	Blank(s)	Blank(s)	Blank(s)	Blank(s)	Complete dates are available and there are more than 0 days of survival	Chronic Liver Disease and Cirrhosis	1324	776	784	1328	817	1346	1230	761	0	1975	Blank(s)	Blank(s)	Blank(s)	Dead
65-69 years	White	Male	Positive histology	Unknown	Liver	8170	Blank(s)	Blank(s)	Blank(s)	Blank(s)	Blank(s)	Blank(s)	Recommended but not performed, unknown reason	Blank(s)	Blank(s)	Blank(s)	9	Blank(s)	Blank(s)	Blank(s)	Blank(s)	Blank(s)	Blank(s)	Blank(s)	Blank(s)	Blank(s)	Complete dates are available and there are more than 0 days of survival	Liver	1324	776	784	1328	817	1346	1230	761	2	1980	Blank(s)	Blank(s)	Blank(s)	Dead
75-79 years	White	Male	Positive histology	Unknown	Liver	8170	Blank(s)	Blank(s)	88	0	Blank(s)	Blank(s)	Not recommended	0	0	0	Blank(s)	Blank(s)	0	Blank(s)	Blank(s)	Blank(s)	Blank(s)	Blank(s)	Blank(s)	Blank(s)	Complete dates are available and there are more than 0 days of survival	Liver	1250	851	883	1288	861	1250	1179	819	1	1998	Blank(s)	Blank(s)	Blank(s)	Dead
65-69 years	Other (American Indian/AK Native, Asian/Pacific Islander)	Male	Positive histology	Unknown	Liver	8170	Blank(s)	Blank(s)	Blank(s)	Blank(s)	Blank(s)	Blank(s)	Recommended but not performed, unknown reason	Blank(s)	Blank(s)	Blank(s)	9	Blank(s)	Blank(s)	Blank(s)	Blank(s)	Blank(s)	Blank(s)	Blank(s)	Blank(s)	Blank(s)	Complete dates are available and there are more than 0 days of survival	Liver	1324	776	784	1328	817	1346	1230	761	5	1978	Blank(s)	Blank(s)	Blank(s)	Dead
85+ years	Other (American Indian/AK Native, Asian/Pacific Islander)	Male	Radiography without microscopic confirm	Unknown	Liver	8170	Blank(s)	Blank(s)	Blank(s)	Blank(s)	Blank(s)	Blank(s)	Recommended but not performed, unknown reason	Blank(s)	Blank(s)	Blank(s)	9	Blank(s)	Blank(s)	Blank(s)	Blank(s)	Blank(s)	Blank(s)	Blank(s)	Blank(s)	Blank(s)	Complete dates are available and there are more than 0 days of survival	Liver	1324	776	784	1328	817	1346	1230	761	20	1978	Blank(s)	Blank(s)	Blank(s)	Dead
70-74 years	White	Male	Positive histology	Undifferentiated; anaplastic; Grade IV	Liver	8170	Blank(s)	Blank(s)	Blank(s)	Blank(s)	Blank(s)	Blank(s)	Recommended but not performed, unknown reason	Blank(s)	Blank(s)	Blank(s)	9	Blank(s)	Blank(s)	Blank(s)	Blank(s)	Blank(s)	Blank(s)	Blank(s)	Blank(s)	Blank(s)	Complete dates are available and there are more than 0 days of survival	Liver	1085	781	766	1065	760	1053	988	715	0	1976	Blank(s)	Blank(s)	Blank(s)	Dead
85+ years	White	Female	Unknown	Unknown	Liver	8000	NA	UNK Stage	Blank(s)	99	Unknown or not applicable	Unknown; death certificate only	Unknown; death certificate; or autopsy only (2003+)	Blank(s)	Blank(s)	Blank(s)	Blank(s)	Blank(s)	99	999	999	999	99	9	999	999	Not calculated because a Death Certificate Only or Autopsy Only case	Liver	1085	781	766	1065	760	1053	988	715	Unknown	2012	NA	NA	NA	Dead
75-79 years	Other (American Indian/AK Native, Asian/Pacific Islander)	Female	Radiography without microscopic confirm	Unknown	Liver	8170	Blank(s)	Blank(s)	88	Blank(s)	Blank(s)	Blank(s)	Not recommended	Blank(s)	Blank(s)	Blank(s)	0	Blank(s)	0	Blank(s)	Blank(s)	Blank(s)	Blank(s)	Blank(s)	Blank(s)	Blank(s)	Complete dates are available and there are more than 0 days of survival	Liver	1085	781	766	1065	760	1053	988	715	0	1990	Blank(s)	Blank(s)	Blank(s)	Dead
85+ years	White	Female	Unknown	Unknown	Liver	8010	Blank(s)	Blank(s)	Blank(s)	Blank(s)	Blank(s)	Blank(s)	Unknown; death certificate; or autopsy only (2003+)	Blank(s)	Blank(s)	Blank(s)	9	Blank(s)	Blank(s)	Blank(s)	Blank(s)	Blank(s)	Blank(s)	Blank(s)	Blank(s)	Blank(s)	Not calculated because a Death Certificate Only or Autopsy Only case	Liver	1324	776	784	1328	817	1346	1230	761	Unknown	1976	Blank(s)	Blank(s)	Blank(s)	Dead
50-54 years	Black	Male	Positive histology	Unknown	Liver	8170	Blank(s)	Blank(s)	Blank(s)	Blank(s)	Blank(s)	Blank(s)	Recommended but not performed, unknown reason	Blank(s)	Blank(s)	Blank(s)	9	Blank(s)	Blank(s)	Blank(s)	Blank(s)	Blank(s)	Blank(s)	Blank(s)	Blank(s)	Blank(s)	Complete dates are available and there are more than 0 days of survival	Liver	1250	851	883	1288	861	1250	1179	819	29	1980	Blank(s)	Blank(s)	Blank(s)	Dead
70-74 years	Black	Female	Positive histology	Well differentiated; Grade I	Liver	8170	Blank(s)	I	Blank(s)	36	1 to 3 regional lymph nodes removed	None; diagnosed at autopsy	Surgery performed	Blank(s)	Blank(s)	Blank(s)	Blank(s)	Blank(s)	2	24	100	0	0	0	999	999	Complete dates are available and there are more than 0 days of survival	Diseases of Heart	1085	781	766	1065	760	1053	988	715	50	2004	Blank(s)	Blank(s)	Blank(s)	Dead
70-74 years	White	Male	Positive histology	Unknown	Liver	8170	IVB	IV	Blank(s)	0	None	None; diagnosed at autopsy	Not recommended	Blank(s)	Blank(s)	Blank(s)	Blank(s)	Blank(s)	0	82	440	0	40	0	10	999	Complete dates are available and there are more than 0 days of survival	Liver	1250	851	883	1288	861	1250	1179	819	5	2011	T3a	N0	M1	Dead
85+ years	White	Female	Radiography without microscopic confirm	Unknown	Liver	8010	Blank(s)	Blank(s)	Blank(s)	Blank(s)	Blank(s)	Blank(s)	Recommended but not performed, unknown reason	Blank(s)	Blank(s)	Blank(s)	9	Blank(s)	Blank(s)	Blank(s)	Blank(s)	Blank(s)	Blank(s)	Blank(s)	Blank(s)	Blank(s)	Complete dates are available and there are more than 0 days of survival	Miscellaneous Malignant Cancer	1324	776	784	1328	817	1346	1230	761	2	1982	Blank(s)	Blank(s)	Blank(s)	Dead
65-69 years	White	Male	Positive histology	Unknown	Liver	8170	Blank(s)	Blank(s)	Blank(s)	Blank(s)	Blank(s)	Blank(s)	Recommended but not performed, unknown reason	Blank(s)	Blank(s)	Blank(s)	9	Blank(s)	Blank(s)	Blank(s)	Blank(s)	Blank(s)	Blank(s)	Blank(s)	Blank(s)	Blank(s)	Complete dates are available and there are more than 0 days of survival	Liver	1250	851	883	1288	861	1250	1179	819	3	1979	Blank(s)	Blank(s)	Blank(s)	Dead
65-69 years	White	Female	Radiography without microscopic confirm	Unknown	Liver	8170	Blank(s)	IV	Blank(s)	0	None	None; diagnosed at autopsy	Not recommended	Blank(s)	Blank(s)	Blank(s)	Blank(s)	Blank(s)	0	20	100	999	40	0	20	999	Complete dates are available and there are more than 0 days of survival	Other Infectious and Parasitic Diseases including HIV	1324	776	784	1328	817	1346	1230	761	5	2005	Blank(s)	Blank(s)	Blank(s)	Dead
70-74 years	White	Male	Positive histology	Unknown	Liver	8170	Blank(s)	Blank(s)	Blank(s)	Blank(s)	Blank(s)	Blank(s)	Recommended but not performed, unknown reason	Blank(s)	Blank(s)	Blank(s)	9	Blank(s)	Blank(s)	Blank(s)	Blank(s)	Blank(s)	Blank(s)	Blank(s)	Blank(s)	Blank(s)	Complete dates are available and there are more than 0 days of survival	Liver	797	484	467	759	477	760	695	453	2	1980	Blank(s)	Blank(s)	Blank(s)	Dead
70-74 years	White	Male	Positive histology	Unknown	Liver	8170	Blank(s)	Blank(s)	Blank(s)	Blank(s)	Blank(s)	Blank(s)	Recommended but not performed, unknown reason	Blank(s)	Blank(s)	Blank(s)	9	Blank(s)	Blank(s)	Blank(s)	Blank(s)	Blank(s)	Blank(s)	Blank(s)	Blank(s)	Blank(s)	Complete dates are available and there are more than 0 days of survival	Chronic Liver Disease and Cirrhosis	1324	776	784	1328	817	1346	1230	761	0	1975	Blank(s)	Blank(s)	Blank(s)	Dead
50-54 years	White	Male	Positive histology	Poorly differentiated; Grade III	Liver	8010	Blank(s)	Blank(s)	Blank(s)	Blank(s)	Blank(s)	Blank(s)	Recommended but not performed, unknown reason	Blank(s)	Blank(s)	Blank(s)	9	Blank(s)	Blank(s)	Blank(s)	Blank(s)	Blank(s)	Blank(s)	Blank(s)	Blank(s)	Blank(s)	Complete dates are available and there are more than 0 days of survival	Miscellaneous Malignant Cancer	1324	776	784	1328	817	1346	1230	761	1	1975	Blank(s)	Blank(s)	Blank(s)	Dead
55-59 years	Other (American Indian/AK Native, Asian/Pacific Islander)	Male	Positive histology	Well differentiated; Grade I	Liver	8170	Blank(s)	Blank(s)	Blank(s)	Blank(s)	Blank(s)	Blank(s)	Recommended but not performed, unknown reason	Blank(s)	Blank(s)	Blank(s)	9	Blank(s)	Blank(s)	Blank(s)	Blank(s)	Blank(s)	Blank(s)	Blank(s)	Blank(s)	Blank(s)	Complete dates are available and there are more than 0 days of survival	Liver	1324	776	784	1328	817	1346	1230	761	10	1980	Blank(s)	Blank(s)	Blank(s)	Dead
70-74 years	Other (American Indian/AK Native, Asian/Pacific Islander)	Male	Positive histology	Unknown	Liver	8170	Blank(s)	Blank(s)	Blank(s)	Blank(s)	Blank(s)	Blank(s)	Recommended but not performed, unknown reason	Blank(s)	Blank(s)	Blank(s)	9	Blank(s)	Blank(s)	Blank(s)	Blank(s)	Blank(s)	Blank(s)	Blank(s)	Blank(s)	Blank(s)	Complete dates are available and there are more than 0 days of survival	Liver	1324	776	784	1328	817	1346	1230	761	0	1976	Blank(s)	Blank(s)	Blank(s)	Dead
65-69 years	Black	Female	Radiography without microscopic confirm	Unknown	Liver	8170	Blank(s)	Blank(s)	Blank(s)	Blank(s)	Blank(s)	Blank(s)	Recommended but not performed, unknown reason	Blank(s)	Blank(s)	Blank(s)	9	Blank(s)	Blank(s)	Blank(s)	Blank(s)	Blank(s)	Blank(s)	Blank(s)	Blank(s)	Blank(s)	Complete dates are available and there are more than 0 days of survival	Chronic Liver Disease and Cirrhosis	797	484	467	759	477	760	695	453	1	1979	Blank(s)	Blank(s)	Blank(s)	Dead
35-39 years	Black	Female	Positive histology	Poorly differentiated; Grade III	Liver	8170	Blank(s)	Blank(s)	Blank(s)	Blank(s)	Blank(s)	Blank(s)	Recommended but not performed, unknown reason	Blank(s)	Blank(s)	Blank(s)	9	Blank(s)	Blank(s)	Blank(s)	Blank(s)	Blank(s)	Blank(s)	Blank(s)	Blank(s)	Blank(s)	Complete dates are available and there are more than 0 days of survival	Liver	1324	776	784	1328	817	1346	1230	761	4	1979	Blank(s)	Blank(s)	Blank(s)	Dead
55-59 years	White	Male	Positive histology	Unknown	Liver	8010	Blank(s)	Blank(s)	Blank(s)	Blank(s)	Blank(s)	Blank(s)	Recommended but not performed, unknown reason	Blank(s)	Blank(s)	Blank(s)	9	Blank(s)	Blank(s)	Blank(s)	Blank(s)	Blank(s)	Blank(s)	Blank(s)	Blank(s)	Blank(s)	Complete dates are available and there are more than 0 days of survival	Liver	1250	851	883	1288	861	1250	1179	819	1	1978	Blank(s)	Blank(s)	Blank(s)	Dead
55-59 years	Black	Male	Positive histology	Unknown	Liver	8170	Blank(s)	Blank(s)	Blank(s)	Blank(s)	Blank(s)	Blank(s)	Recommended but not performed, unknown reason	Blank(s)	Blank(s)	Blank(s)	9	Blank(s)	Blank(s)	Blank(s)	Blank(s)	Blank(s)	Blank(s)	Blank(s)	Blank(s)	Blank(s)	Complete dates are available and there are more than 0 days of survival	Liver	1250	851	883	1288	861	1250	1179	819	9	1976	Blank(s)	Blank(s)	Blank(s)	Dead
80-84 years	White	Female	Positive histology	Unknown	Liver	8170	Blank(s)	Blank(s)	88	Blank(s)	Blank(s)	Blank(s)	Recommended but not performed, unknown reason	Blank(s)	Blank(s)	Blank(s)	2	Blank(s)	99	Blank(s)	Blank(s)	Blank(s)	Blank(s)	Blank(s)	Blank(s)	Blank(s)	Complete dates are available and there are more than 0 days of survival	Liver	1324	776	784	1328	817	1346	1230	761	13	1993	Blank(s)	Blank(s)	Blank(s)	Dead
70-74 years	White	Female	Positive histology	Unknown	BileDuctsIntraHepat	8180	Blank(s)	Blank(s)	Blank(s)	Blank(s)	Blank(s)	Blank(s)	Recommended but not performed, unknown reason	Blank(s)	Blank(s)	Blank(s)	9	Blank(s)	Blank(s)	Blank(s)	Blank(s)	Blank(s)	Blank(s)	Blank(s)	Blank(s)	Blank(s)	Complete dates are available and there are more than 0 days of survival	Liver	833	495	534	878	444	774	723	419	0	1979	Blank(s)	Blank(s)	Blank(s)	Dead
70-74 years	White	Female	Positive histology	Unknown	Liver	8170	Blank(s)	Blank(s)	Blank(s)	Blank(s)	Blank(s)	Blank(s)	Recommended but not performed, unknown reason	Blank(s)	Blank(s)	Blank(s)	9	Blank(s)	Blank(s)	Blank(s)	Blank(s)	Blank(s)	Blank(s)	Blank(s)	Blank(s)	Blank(s)	Complete dates are available and there are more than 0 days of survival	Liver	1085	781	766	1065	760	1053	988	715	10	1979	Blank(s)	Blank(s)	Blank(s)	Dead
70-74 years	White	Male	Positive histology	Unknown	Liver	8170	Blank(s)	Blank(s)	Blank(s)	Blank(s)	Blank(s)	Blank(s)	Surgery performed	Blank(s)	Blank(s)	Blank(s)	90	Blank(s)	Blank(s)	Blank(s)	Blank(s)	Blank(s)	Blank(s)	Blank(s)	Blank(s)	Blank(s)	Complete dates are available and there are more than 0 days of survival	Liver	1250	851	883	1288	861	1250	1179	819	0	1979	Blank(s)	Blank(s)	Blank(s)	Dead
75-79 years	Other (American Indian/AK Native, Asian/Pacific Islander)	Male	Positive histology	Unknown	Liver	8170	Blank(s)	Blank(s)	Blank(s)	Blank(s)	Blank(s)	Blank(s)	Recommended but not performed, unknown reason	Blank(s)	Blank(s)	Blank(s)	9	Blank(s)	Blank(s)	Blank(s)	Blank(s)	Blank(s)	Blank(s)	Blank(s)	Blank(s)	Blank(s)	Complete dates are available and there are more than 0 days of survival	In situ, benign or unknown behavior neoplasm	1324	776	784	1328	817	1346	1230	761	0	1979	Blank(s)	Blank(s)	Blank(s)	Dead
85+ years	White	Female	Unknown	Unknown	Liver	8010	Blank(s)	Blank(s)	Blank(s)	Blank(s)	Blank(s)	Blank(s)	Unknown; death certificate; or autopsy only (2003+)	Blank(s)	Blank(s)	Blank(s)	9	Blank(s)	Blank(s)	Blank(s)	Blank(s)	Blank(s)	Blank(s)	Blank(s)	Blank(s)	Blank(s)	Not calculated because a Death Certificate Only or Autopsy Only case	Liver	1250	851	883	1288	861	1250	1179	819	Unknown	1975	Blank(s)	Blank(s)	Blank(s)	Dead
60-64 years	Other (American Indian/AK Native, Asian/Pacific Islander)	Male	Positive histology	Undifferentiated; anaplastic; Grade IV	Liver	8170	Blank(s)	Blank(s)	Blank(s)	Blank(s)	Blank(s)	Blank(s)	Recommended but not performed, unknown reason	Blank(s)	Blank(s)	Blank(s)	9	Blank(s)	Blank(s)	Blank(s)	Blank(s)	Blank(s)	Blank(s)	Blank(s)	Blank(s)	Blank(s)	Complete dates are available and there are more than 0 days of survival	Liver	1324	776	784	1328	817	1346	1230	761	3	1980	Blank(s)	Blank(s)	Blank(s)	Dead
70-74 years	White	Male	Positive histology	Unknown	Liver	8170	Blank(s)	Blank(s)	Blank(s)	Blank(s)	Blank(s)	Blank(s)	Recommended but not performed, unknown reason	Blank(s)	Blank(s)	Blank(s)	9	Blank(s)	Blank(s)	Blank(s)	Blank(s)	Blank(s)	Blank(s)	Blank(s)	Blank(s)	Blank(s)	Complete dates are available and there are more than 0 days of survival	Liver	797	484	467	759	477	760	695	453	0	1976	Blank(s)	Blank(s)	Blank(s)	Dead
55-59 years	White	Male	Positive histology	Well differentiated; Grade I	Liver	8170	Blank(s)	Blank(s)	Blank(s)	Blank(s)	Blank(s)	Blank(s)	Not recommended, contraindicated due to other cond; autopsy only (1973-2002)	Blank(s)	Blank(s)	Blank(s)	0	Blank(s)	Blank(s)	Blank(s)	Blank(s)	Blank(s)	Blank(s)	Blank(s)	Blank(s)	Blank(s)	Not calculated because a Death Certificate Only or Autopsy Only case	Myeloma	1324	776	784	1328	817	1346	1230	761	Unknown	1977	Blank(s)	Blank(s)	Blank(s)	Dead
80-84 years	Other (American Indian/AK Native, Asian/Pacific Islander)	Male	Radiography without microscopic confirm	Unknown	Liver	8170	Blank(s)	Blank(s)	88	Blank(s)	Blank(s)	Blank(s)	Not recommended, contraindicated due to other cond; autopsy only (1973-2002)	Blank(s)	Blank(s)	Blank(s)	0	Blank(s)	0	Blank(s)	Blank(s)	Blank(s)	Blank(s)	Blank(s)	Blank(s)	Blank(s)	Complete dates are available and there are more than 0 days of survival	Liver	1324	776	784	1328	817	1346	1230	761	12	1994	Blank(s)	Blank(s)	Blank(s)	Dead
70-74 years	White	Male	Positive histology	Unknown	Liver	8170	Blank(s)	Blank(s)	Blank(s)	Blank(s)	Blank(s)	Blank(s)	Recommended but not performed, unknown reason	Blank(s)	Blank(s)	Blank(s)	9	Blank(s)	Blank(s)	Blank(s)	Blank(s)	Blank(s)	Blank(s)	Blank(s)	Blank(s)	Blank(s)	Complete dates are available and there are more than 0 days of survival	Liver	1324	776	784	1328	817	1346	1230	761	1	1976	Blank(s)	Blank(s)	Blank(s)	Dead
70-74 years	White	Female	Positive histology	Poorly differentiated; Grade III	Liver	8170	Blank(s)	Blank(s)	Blank(s)	Blank(s)	Blank(s)	Blank(s)	Recommended but not performed, unknown reason	Blank(s)	Blank(s)	Blank(s)	9	Blank(s)	Blank(s)	Blank(s)	Blank(s)	Blank(s)	Blank(s)	Blank(s)	Blank(s)	Blank(s)	Complete dates are available and there are more than 0 days of survival	Other Biliary	1324	776	784	1328	817	1346	1230	761	1	1977	Blank(s)	Blank(s)	Blank(s)	Dead
85+ years	White	Female	Positive histology	Unknown	Liver	8170	Blank(s)	Blank(s)	Blank(s)	Blank(s)	Blank(s)	Blank(s)	Recommended but not performed, unknown reason	Blank(s)	Blank(s)	Blank(s)	9	Blank(s)	Blank(s)	Blank(s)	Blank(s)	Blank(s)	Blank(s)	Blank(s)	Blank(s)	Blank(s)	Complete dates are available and there are more than 0 days of survival	Diseases of Heart	1085	781	766	1065	760	1053	988	715	0	1980	Blank(s)	Blank(s)	Blank(s)	Dead
80-84 years	White	Male	Unknown	Unknown	Liver	8170	Blank(s)	Blank(s)	Blank(s)	Blank(s)	Blank(s)	Blank(s)	Unknown; death certificate; or autopsy only (2003+)	Blank(s)	Blank(s)	Blank(s)	9	Blank(s)	Blank(s)	Blank(s)	Blank(s)	Blank(s)	Blank(s)	Blank(s)	Blank(s)	Blank(s)	Not calculated because a Death Certificate Only or Autopsy Only case	Diseases of Heart	833	495	534	878	444	774	723	419	Unknown	1976	Blank(s)	Blank(s)	Blank(s)	Dead
35-39 years	White	Female	Positive histology	Poorly differentiated; Grade III	Liver	8170	Blank(s)	Blank(s)	Blank(s)	Blank(s)	Blank(s)	Blank(s)	Recommended but not performed, unknown reason	Blank(s)	Blank(s)	Blank(s)	9	Blank(s)	Blank(s)	Blank(s)	Blank(s)	Blank(s)	Blank(s)	Blank(s)	Blank(s)	Blank(s)	Complete dates are available and there are more than 0 days of survival	Liver	1085	781	766	1065	760	1053	988	715	7	1978	Blank(s)	Blank(s)	Blank(s)	Dead
55-59 years	Other (American Indian/AK Native, Asian/Pacific Islander)	Male	Positive histology	Unknown	Liver	8170	Blank(s)	Blank(s)	Blank(s)	Blank(s)	Blank(s)	Blank(s)	Recommended but not performed, unknown reason	Blank(s)	Blank(s)	Blank(s)	9	Blank(s)	Blank(s)	Blank(s)	Blank(s)	Blank(s)	Blank(s)	Blank(s)	Blank(s)	Blank(s)	Complete dates are available and there are more than 0 days of survival	Liver	1324	776	784	1328	817	1346	1230	761	0	1980	Blank(s)	Blank(s)	Blank(s)	Dead
55-59 years	Other (American Indian/AK Native, Asian/Pacific Islander)	Male	Positive histology	Well differentiated; Grade I	Liver	8170	Blank(s)	Blank(s)	Blank(s)	Blank(s)	Blank(s)	Blank(s)	Recommended but not performed, unknown reason	Blank(s)	Blank(s)	Blank(s)	9	Blank(s)	Blank(s)	Blank(s)	Blank(s)	Blank(s)	Blank(s)	Blank(s)	Blank(s)	Blank(s)	Complete dates are available and there are more than 0 days of survival	Liver	1250	851	883	1288	861	1250	1179	819	2	1975	Blank(s)	Blank(s)	Blank(s)	Dead
60-64 years	Black	Male	Radiography without microscopic confirm	Unknown	Liver	8170	Blank(s)	Blank(s)	Blank(s)	Blank(s)	Blank(s)	Blank(s)	Recommended but not performed, unknown reason	Blank(s)	Blank(s)	Blank(s)	9	Blank(s)	Blank(s)	Blank(s)	Blank(s)	Blank(s)	Blank(s)	Blank(s)	Blank(s)	Blank(s)	Complete dates are available and there are more than 0 days of survival	Other Cause of Death	1250	851	883	1288	861	1250	1179	819	4	1980	Blank(s)	Blank(s)	Blank(s)	Dead
20-24 years	Black	Female	Positive histology	Unknown	Liver	8170	Blank(s)	Blank(s)	Blank(s)	Blank(s)	Blank(s)	Blank(s)	Surgery performed	Blank(s)	Blank(s)	Blank(s)	90	Blank(s)	Blank(s)	Blank(s)	Blank(s)	Blank(s)	Blank(s)	Blank(s)	Blank(s)	Blank(s)	Complete dates are available and there are more than 0 days of survival	Liver	1250	851	883	1288	861	1250	1179	819	22	1980	Blank(s)	Blank(s)	Blank(s)	Dead
75-79 years	Other (American Indian/AK Native, Asian/Pacific Islander)	Male	Positive histology	Undifferentiated; anaplastic; Grade IV	Liver	8170	Blank(s)	Blank(s)	Blank(s)	Blank(s)	Blank(s)	Blank(s)	Recommended but not performed, unknown reason	Blank(s)	Blank(s)	Blank(s)	9	Blank(s)	Blank(s)	Blank(s)	Blank(s)	Blank(s)	Blank(s)	Blank(s)	Blank(s)	Blank(s)	Complete dates are available and there are more than 0 days of survival	Liver	1250	851	883	1288	861	1250	1179	819	1	1975	Blank(s)	Blank(s)	Blank(s)	Dead
70-74 years	Unknown	Female	Positive histology	Unknown	Liver	8170	Blank(s)	Blank(s)	Blank(s)	Blank(s)	Blank(s)	Blank(s)	Recommended but not performed, unknown reason	Blank(s)	Blank(s)	Blank(s)	9	Blank(s)	Blank(s)	Blank(s)	Blank(s)	Blank(s)	Blank(s)	Blank(s)	Blank(s)	Blank(s)	Complete dates are available and there are more than 0 days of survival	Liver	1250	851	883	1288	861	1250	1179	819	0	1979	Blank(s)	Blank(s)	Blank(s)	Dead
85+ years	Other (American Indian/AK Native, Asian/Pacific Islander)	Female	Positive histology	Moderately differentiated; Grade II	Liver	8500	Blank(s)	Blank(s)	Blank(s)	Blank(s)	Blank(s)	Blank(s)	Recommended but not performed, unknown reason	Blank(s)	Blank(s)	Blank(s)	9	Blank(s)	Blank(s)	Blank(s)	Blank(s)	Blank(s)	Blank(s)	Blank(s)	Blank(s)	Blank(s)	Complete dates are available and there are more than 0 days of survival	Intrahepatic Bile Duct	1250	851	883	1288	861	1250	1179	819	1	1983	Blank(s)	Blank(s)	Blank(s)	Dead
75-79 years	White	Female	Positive histology	Unknown	Liver	8170	Blank(s)	Blank(s)	Blank(s)	Blank(s)	Blank(s)	Blank(s)	Recommended but not performed, unknown reason	Blank(s)	Blank(s)	Blank(s)	9	Blank(s)	Blank(s)	Blank(s)	Blank(s)	Blank(s)	Blank(s)	Blank(s)	Blank(s)	Blank(s)	Complete dates are available and there are more than 0 days of survival	Miscellaneous Malignant Cancer	1324	776	784	1328	817	1346	1230	761	0	1979	Blank(s)	Blank(s)	Blank(s)	Dead
80-84 years	White	Female	Radiography without microscopic confirm	Unknown	Liver	8010	Blank(s)	Blank(s)	88	Blank(s)	Blank(s)	Blank(s)	Not recommended	Blank(s)	Blank(s)	Blank(s)	0	Blank(s)	0	Blank(s)	Blank(s)	Blank(s)	Blank(s)	Blank(s)	Blank(s)	Blank(s)	Complete dates are available and there are more than 0 days of survival	Liver	1250	851	883	1288	861	1250	1179	819	19	1996	Blank(s)	Blank(s)	Blank(s)	Dead
80-84 years	White	Female	Positive histology	Poorly differentiated; Grade III	Liver	8170	Blank(s)	Blank(s)	Blank(s)	Blank(s)	Blank(s)	Blank(s)	Surgery performed	Blank(s)	Blank(s)	Blank(s)	90	Blank(s)	Blank(s)	Blank(s)	Blank(s)	Blank(s)	Blank(s)	Blank(s)	Blank(s)	Blank(s)	Complete dates are available and there are more than 0 days of survival	Liver	1324	776	784	1328	817	1346	1230	761	2	1978	Blank(s)	Blank(s)	Blank(s)	Dead
80-84 years	White	Male	Positive histology	Poorly differentiated; Grade III	Liver	8010	Blank(s)	Blank(s)	Blank(s)	Blank(s)	Blank(s)	Blank(s)	Recommended but not performed, unknown reason	Blank(s)	Blank(s)	Blank(s)	9	Blank(s)	Blank(s)	Blank(s)	Blank(s)	Blank(s)	Blank(s)	Blank(s)	Blank(s)	Blank(s)	Complete dates are available and there are more than 0 days of survival	Miscellaneous Malignant Cancer	1085	781	766	1065	760	1053	988	715	0	1986	Blank(s)	Blank(s)	Blank(s)	Dead
75-79 years	White	Female	Positive histology	Unknown	Liver	8890	Blank(s)	Blank(s)	Blank(s)	Blank(s)	Blank(s)	Blank(s)	Recommended but not performed, unknown reason	Blank(s)	Blank(s)	Blank(s)	9	Blank(s)	Blank(s)	Blank(s)	Blank(s)	Blank(s)	Blank(s)	Blank(s)	Blank(s)	Blank(s)	Complete dates are available and there are more than 0 days of survival	Soft Tissue including Heart	797	484	467	759	477	760	695	453	55	1978	Blank(s)	Blank(s)	Blank(s)	Dead
65-69 years	White	Male	Positive histology	Unknown	Liver	8170	Blank(s)	Blank(s)	Blank(s)	Blank(s)	Blank(s)	Blank(s)	Recommended but not performed, unknown reason	Blank(s)	Blank(s)	Blank(s)	9	Blank(s)	Blank(s)	Blank(s)	Blank(s)	Blank(s)	Blank(s)	Blank(s)	Blank(s)	Blank(s)	Complete dates are available and there are more than 0 days of survival	Liver	1085	781	766	1065	760	1053	988	715	0	1977	Blank(s)	Blank(s)	Blank(s)	Dead
50-54 years	Black	Female	Clinical diagnosis only	Unknown	Liver	8170	Blank(s)	I	Blank(s)	0	None	None; diagnosed at autopsy	Not recommended	Blank(s)	Blank(s)	Blank(s)	Blank(s)	Blank(s)	0	85	170	0	0	0	999	999	Complete dates are available and there are more than 0 days of survival	Liver	1250	851	883	1288	861	1250	1179	819	0	2005	Blank(s)	Blank(s)	Blank(s)	Dead
80-84 years	Black	Male	Positive histology	Unknown	Liver	8170	Blank(s)	Blank(s)	Blank(s)	Blank(s)	Blank(s)	Blank(s)	Recommended but not performed, unknown reason	Blank(s)	Blank(s)	Blank(s)	9	Blank(s)	Blank(s)	Blank(s)	Blank(s)	Blank(s)	Blank(s)	Blank(s)	Blank(s)	Blank(s)	Complete dates are available and there are more than 0 days of survival	Liver	1324	776	784	1328	817	1346	1230	761	0	1976	Blank(s)	Blank(s)	Blank(s)	Dead
60-64 years	White	Male	Positive histology	Unknown	Liver	8170	Blank(s)	Blank(s)	Blank(s)	Blank(s)	Blank(s)	Blank(s)	Recommended but not performed, unknown reason	Blank(s)	Blank(s)	Blank(s)	9	Blank(s)	Blank(s)	Blank(s)	Blank(s)	Blank(s)	Blank(s)	Blank(s)	Blank(s)	Blank(s)	Complete dates are available and there are more than 0 days of survival	Liver	1324	776	784	1328	817	1346	1230	761	1	1976	Blank(s)	Blank(s)	Blank(s)	Dead
75-79 years	Other (American Indian/AK Native, Asian/Pacific Islander)	Male	Positive histology	Unknown	Liver	8170	Blank(s)	Blank(s)	Blank(s)	Blank(s)	Blank(s)	Blank(s)	Recommended but not performed, unknown reason	Blank(s)	Blank(s)	Blank(s)	9	Blank(s)	Blank(s)	Blank(s)	Blank(s)	Blank(s)	Blank(s)	Blank(s)	Blank(s)	Blank(s)	Complete dates are available and there are more than 0 days of survival	Liver	1324	776	784	1328	817	1346	1230	761	3	1978	Blank(s)	Blank(s)	Blank(s)	Dead
65-69 years	White	Male	Positive histology	Unknown	Liver	8170	Blank(s)	Blank(s)	Blank(s)	Blank(s)	Blank(s)	Blank(s)	Recommended but not performed, unknown reason	Blank(s)	Blank(s)	Blank(s)	9	Blank(s)	Blank(s)	Blank(s)	Blank(s)	Blank(s)	Blank(s)	Blank(s)	Blank(s)	Blank(s)	Incomplete dates are available and there cannot be zero days of follow-up	Liver	797	484	467	759	477	760	695	453	27	1976	Blank(s)	Blank(s)	Blank(s)	Dead
50-54 years	Other (American Indian/AK Native, Asian/Pacific Islander)	Male	Positive histology	Unknown	Liver	8170	Blank(s)	Blank(s)	Blank(s)	Blank(s)	Blank(s)	Blank(s)	Recommended but not performed, unknown reason	Blank(s)	Blank(s)	Blank(s)	9	Blank(s)	Blank(s)	Blank(s)	Blank(s)	Blank(s)	Blank(s)	Blank(s)	Blank(s)	Blank(s)	Complete dates are available and there are more than 0 days of survival	Liver	1324	776	784	1328	817	1346	1230	761	2	1977	Blank(s)	Blank(s)	Blank(s)	Dead
50-54 years	Black	Male	Positive histology	Unknown	Liver	8170	Blank(s)	Blank(s)	Blank(s)	Blank(s)	Blank(s)	Blank(s)	Recommended but not performed, unknown reason	Blank(s)	Blank(s)	Blank(s)	9	Blank(s)	Blank(s)	Blank(s)	Blank(s)	Blank(s)	Blank(s)	Blank(s)	Blank(s)	Blank(s)	Complete dates are available and there are more than 0 days of survival	Miscellaneous Malignant Cancer	1250	851	883	1288	861	1250	1179	819	1	1975	Blank(s)	Blank(s)	Blank(s)	Dead
85+ years	White	Male	Positive histology	Undifferentiated; anaplastic; Grade IV	Liver	8170	Blank(s)	Blank(s)	Blank(s)	Blank(s)	Blank(s)	Blank(s)	Not recommended, contraindicated due to other cond; autopsy only (1973-2002)	Blank(s)	Blank(s)	Blank(s)	0	Blank(s)	Blank(s)	Blank(s)	Blank(s)	Blank(s)	Blank(s)	Blank(s)	Blank(s)	Blank(s)	Not calculated because a Death Certificate Only or Autopsy Only case	Diseases of Heart	1324	776	784	1328	817	1346	1230	761	Unknown	1978	Blank(s)	Blank(s)	Blank(s)	Dead
50-54 years	White	Male	Positive histology	Unknown	Liver	8170	Blank(s)	Blank(s)	Blank(s)	Blank(s)	Blank(s)	Blank(s)	Recommended but not performed, unknown reason	Blank(s)	Blank(s)	Blank(s)	9	Blank(s)	Blank(s)	Blank(s)	Blank(s)	Blank(s)	Blank(s)	Blank(s)	Blank(s)	Blank(s)	Complete dates are available and there are more than 0 days of survival	Liver	1250	851	883	1288	861	1250	1179	819	0	1976	Blank(s)	Blank(s)	Blank(s)	Dead
55-59 years	Other (American Indian/AK Native, Asian/Pacific Islander)	Male	Positive histology	Unknown	Liver	8170	Blank(s)	Blank(s)	Blank(s)	Blank(s)	Blank(s)	Blank(s)	Surgery performed	Blank(s)	Blank(s)	Blank(s)	90	Blank(s)	Blank(s)	Blank(s)	Blank(s)	Blank(s)	Blank(s)	Blank(s)	Blank(s)	Blank(s)	Complete dates are available and there are more than 0 days of survival	Liver	1324	776	784	1328	817	1346	1230	761	0	1977	Blank(s)	Blank(s)	Blank(s)	Dead
65-69 years	Black	Male	Positive histology	Unknown	Liver	8170	Blank(s)	Blank(s)	Blank(s)	Blank(s)	Blank(s)	Blank(s)	Recommended but not performed, unknown reason	Blank(s)	Blank(s)	Blank(s)	9	Blank(s)	Blank(s)	Blank(s)	Blank(s)	Blank(s)	Blank(s)	Blank(s)	Blank(s)	Blank(s)	Complete dates are available and there are more than 0 days of survival	Miscellaneous Malignant Cancer	1324	776	784	1328	817	1346	1230	761	2	1982	Blank(s)	Blank(s)	Blank(s)	Dead
80-84 years	Black	Male	Positive histology	Unknown	Liver	8170	Blank(s)	Blank(s)	Blank(s)	Blank(s)	Blank(s)	Blank(s)	Recommended but not performed, unknown reason	Blank(s)	Blank(s)	Blank(s)	9	Blank(s)	Blank(s)	Blank(s)	Blank(s)	Blank(s)	Blank(s)	Blank(s)	Blank(s)	Blank(s)	Complete dates are available and there are more than 0 days of survival	Septicemia	1250	851	883	1288	861	1250	1179	819	31	1982	Blank(s)	Blank(s)	Blank(s)	Dead
55-59 years	Black	Male	Positive histology	Poorly differentiated; Grade III	Liver	8140	Blank(s)	Blank(s)	Blank(s)	Blank(s)	Blank(s)	Blank(s)	Recommended but not performed, unknown reason	Blank(s)	Blank(s)	Blank(s)	9	Blank(s)	Blank(s)	Blank(s)	Blank(s)	Blank(s)	Blank(s)	Blank(s)	Blank(s)	Blank(s)	Complete dates are available and there are more than 0 days of survival	Pancreas	1250	851	883	1288	861	1250	1179	819	5	1975	Blank(s)	Blank(s)	Blank(s)	Dead
45-49 years	White	Male	Positive histology	Unknown	BileDuctsIntraHepat	8180	Blank(s)	Blank(s)	Blank(s)	Blank(s)	Blank(s)	Blank(s)	Recommended but not performed, unknown reason	Blank(s)	Blank(s)	Blank(s)	9	Blank(s)	Blank(s)	Blank(s)	Blank(s)	Blank(s)	Blank(s)	Blank(s)	Blank(s)	Blank(s)	Complete dates are available and there are more than 0 days of survival	State DC not available or state DC available but no COD	797	484	467	759	477	760	695	453	1	1977	Blank(s)	Blank(s)	Blank(s)	Dead
85+ years	Other (American Indian/AK Native, Asian/Pacific Islander)	Male	Clinical diagnosis only	Unknown	Liver	8170	Blank(s)	Blank(s)	Blank(s)	Blank(s)	Blank(s)	Blank(s)	Recommended but not performed, unknown reason	Blank(s)	Blank(s)	Blank(s)	9	Blank(s)	Blank(s)	Blank(s)	Blank(s)	Blank(s)	Blank(s)	Blank(s)	Blank(s)	Blank(s)	Incomplete dates are available and there could be zero days of follow-up	State DC not available or state DC available but no COD	1324	776	784	1328	817	1346	1230	761	0	1977	Blank(s)	Blank(s)	Blank(s)	Dead
70-74 years	White	Female	Positive histology	Unknown	BileDuctsIntraHepat	8180	Blank(s)	Blank(s)	88	Blank(s)	Blank(s)	Blank(s)	Not recommended	Blank(s)	Blank(s)	Blank(s)	2	Blank(s)	0	Blank(s)	Blank(s)	Blank(s)	Blank(s)	Blank(s)	Blank(s)	Blank(s)	Complete dates are available and there are more than 0 days of survival	Liver	1250	851	883	1288	861	1250	1179	819	2	1991	Blank(s)	Blank(s)	Blank(s)	Dead
80-84 years	White	Male	Positive histology	Undifferentiated; anaplastic; Grade IV	Liver	8020	Blank(s)	Blank(s)	Blank(s)	Blank(s)	Blank(s)	Blank(s)	Recommended but not performed, unknown reason	Blank(s)	Blank(s)	Blank(s)	9	Blank(s)	Blank(s)	Blank(s)	Blank(s)	Blank(s)	Blank(s)	Blank(s)	Blank(s)	Blank(s)	Complete dates are available and there are more than 0 days of survival	Liver	1250	851	883	1288	861	1250	1179	819	0	1978	Blank(s)	Blank(s)	Blank(s)	Dead
75-79 years	White	Female	Positive histology	Unknown	Liver	8170	Blank(s)	Blank(s)	Blank(s)	Blank(s)	Blank(s)	Blank(s)	Recommended but not performed, unknown reason	Blank(s)	Blank(s)	Blank(s)	9	Blank(s)	Blank(s)	Blank(s)	Blank(s)	Blank(s)	Blank(s)	Blank(s)	Blank(s)	Blank(s)	Complete dates are available and there are more than 0 days of survival	Liver	1324	776	784	1328	817	1346	1230	761	15	1978	Blank(s)	Blank(s)	Blank(s)	Dead
65-69 years	White	Male	Positive histology	Poorly differentiated; Grade III	Liver	8170	Blank(s)	Blank(s)	Blank(s)	Blank(s)	Blank(s)	Blank(s)	Recommended but not performed, unknown reason	Blank(s)	Blank(s)	Blank(s)	9	Blank(s)	Blank(s)	Blank(s)	Blank(s)	Blank(s)	Blank(s)	Blank(s)	Blank(s)	Blank(s)	Complete dates are available and there are more than 0 days of survival	Liver	1324	776	784	1328	817	1346	1230	761	0	1975	Blank(s)	Blank(s)	Blank(s)	Dead
35-39 years	Other (American Indian/AK Native, Asian/Pacific Islander)	Male	Positive histology	Unknown	Liver	8170	Blank(s)	Blank(s)	Blank(s)	Blank(s)	Blank(s)	Blank(s)	Surgery performed	Blank(s)	Blank(s)	Blank(s)	90	Blank(s)	Blank(s)	Blank(s)	Blank(s)	Blank(s)	Blank(s)	Blank(s)	Blank(s)	Blank(s)	Complete dates are available and there are more than 0 days of survival	Liver	1324	776	784	1328	817	1346	1230	761	1	1979	Blank(s)	Blank(s)	Blank(s)	Dead
70-74 years	Other (American Indian/AK Native, Asian/Pacific Islander)	Male	Positive histology	Unknown	Liver	8170	Blank(s)	Blank(s)	Blank(s)	Blank(s)	Blank(s)	Blank(s)	Recommended but not performed, unknown reason	Blank(s)	Blank(s)	Blank(s)	9	Blank(s)	Blank(s)	Blank(s)	Blank(s)	Blank(s)	Blank(s)	Blank(s)	Blank(s)	Blank(s)	Complete dates are available and there are more than 0 days of survival	Liver	1324	776	784	1328	817	1346	1230	761	7	1978	Blank(s)	Blank(s)	Blank(s)	Dead
55-59 years	Other (American Indian/AK Native, Asian/Pacific Islander)	Male	Positive histology	Unknown	Liver	8170	Blank(s)	Blank(s)	Blank(s)	Blank(s)	Blank(s)	Blank(s)	Recommended but not performed, unknown reason	Blank(s)	Blank(s)	Blank(s)	9	Blank(s)	Blank(s)	Blank(s)	Blank(s)	Blank(s)	Blank(s)	Blank(s)	Blank(s)	Blank(s)	Complete dates are available and there are more than 0 days of survival	Chronic Liver Disease and Cirrhosis	1324	776	784	1328	817	1346	1230	761	0	1976	Blank(s)	Blank(s)	Blank(s)	Dead
55-59 years	White	Male	Positive histology	Unknown	Liver	8170	Blank(s)	Blank(s)	Blank(s)	Blank(s)	Blank(s)	Blank(s)	Not recommended, contraindicated due to other cond; autopsy only (1973-2002)	Blank(s)	Blank(s)	Blank(s)	0	Blank(s)	Blank(s)	Blank(s)	Blank(s)	Blank(s)	Blank(s)	Blank(s)	Blank(s)	Blank(s)	Not calculated because a Death Certificate Only or Autopsy Only case	Chronic Liver Disease and Cirrhosis	833	495	534	878	444	774	723	419	Unknown	1975	Blank(s)	Blank(s)	Blank(s)	Dead
80-84 years	White	Female	Radiography without microscopic confirm	Unknown	Liver	8010	Blank(s)	Blank(s)	Blank(s)	Blank(s)	Blank(s)	Blank(s)	Recommended but not performed, unknown reason	Blank(s)	Blank(s)	Blank(s)	9	Blank(s)	Blank(s)	Blank(s)	Blank(s)	Blank(s)	Blank(s)	Blank(s)	Blank(s)	Blank(s)	Complete dates are available and there are more than 0 days of survival	Cerebrovascular Diseases	1324	776	784	1328	817	1346	1230	761	15	1976	Blank(s)	Blank(s)	Blank(s)	Dead
75-79 years	White	Male	Positive histology	Unknown	Liver	8170	Blank(s)	Blank(s)	Blank(s)	Blank(s)	Blank(s)	Blank(s)	Not recommended, contraindicated due to other cond; autopsy only (1973-2002)	Blank(s)	Blank(s)	Blank(s)	0	Blank(s)	Blank(s)	Blank(s)	Blank(s)	Blank(s)	Blank(s)	Blank(s)	Blank(s)	Blank(s)	Not calculated because a Death Certificate Only or Autopsy Only case	Chronic Obstructive Pulmonary Disease and Allied Cond	1250	851	883	1288	861	1250	1179	819	Unknown	1975	Blank(s)	Blank(s)	Blank(s)	Dead
65-69 years	Other (American Indian/AK Native, Asian/Pacific Islander)	Female	Positive histology	Unknown	Liver	8170	Blank(s)	Blank(s)	Blank(s)	Blank(s)	Blank(s)	Blank(s)	Recommended but not performed, unknown reason	Blank(s)	Blank(s)	Blank(s)	9	Blank(s)	Blank(s)	Blank(s)	Blank(s)	Blank(s)	Blank(s)	Blank(s)	Blank(s)	Blank(s)	Complete dates are available and there are more than 0 days of survival	Liver	1324	776	784	1328	817	1346	1230	761	1	1978	Blank(s)	Blank(s)	Blank(s)	Dead
65-69 years	Black	Female	Radiography without microscopic confirm	Unknown	Liver	8010	Blank(s)	Blank(s)	Blank(s)	Blank(s)	Blank(s)	Blank(s)	Recommended but not performed, unknown reason	Blank(s)	Blank(s)	Blank(s)	9	Blank(s)	Blank(s)	Blank(s)	Blank(s)	Blank(s)	Blank(s)	Blank(s)	Blank(s)	Blank(s)	Complete dates are available and there are more than 0 days of survival	Miscellaneous Malignant Cancer	1250	851	883	1288	861	1250	1179	819	0	1975	Blank(s)	Blank(s)	Blank(s)	Dead
70-74 years	Other (American Indian/AK Native, Asian/Pacific Islander)	Male	Positive histology	Unknown	Liver	8170	Blank(s)	Blank(s)	Blank(s)	Blank(s)	Blank(s)	Blank(s)	Recommended but not performed, unknown reason	Blank(s)	Blank(s)	Blank(s)	9	Blank(s)	Blank(s)	Blank(s)	Blank(s)	Blank(s)	Blank(s)	Blank(s)	Blank(s)	Blank(s)	Complete dates are available and there are more than 0 days of survival	Liver	1324	776	784	1328	817	1346	1230	761	3	1978	Blank(s)	Blank(s)	Blank(s)	Dead
70-74 years	White	Female	Positive histology	Well differentiated; Grade I	Liver	8170	Blank(s)	Blank(s)	Blank(s)	Blank(s)	Blank(s)	Blank(s)	Recommended but not performed, unknown reason	Blank(s)	Blank(s)	Blank(s)	9	Blank(s)	Blank(s)	Blank(s)	Blank(s)	Blank(s)	Blank(s)	Blank(s)	Blank(s)	Blank(s)	Complete dates are available and there are more than 0 days of survival	Liver	1250	851	883	1288	861	1250	1179	819	13	1976	Blank(s)	Blank(s)	Blank(s)	Dead
70-74 years	White	Male	Positive histology	Unknown	Liver	8170	Blank(s)	Blank(s)	Blank(s)	Blank(s)	Blank(s)	Blank(s)	Recommended but not performed, unknown reason	Blank(s)	Blank(s)	Blank(s)	9	Blank(s)	Blank(s)	Blank(s)	Blank(s)	Blank(s)	Blank(s)	Blank(s)	Blank(s)	Blank(s)	Complete dates are available and there are more than 0 days of survival	Chronic Liver Disease and Cirrhosis	1324	776	784	1328	817	1346	1230	761	0	1975	Blank(s)	Blank(s)	Blank(s)	Dead
50-54 years	Other (American Indian/AK Native, Asian/Pacific Islander)	Male	Positive histology	Unknown	Liver	8170	Blank(s)	Blank(s)	Blank(s)	Blank(s)	Blank(s)	Blank(s)	Surgery performed	Blank(s)	Blank(s)	Blank(s)	90	Blank(s)	Blank(s)	Blank(s)	Blank(s)	Blank(s)	Blank(s)	Blank(s)	Blank(s)	Blank(s)	Complete dates are available and there are more than 0 days of survival	Liver	1324	776	784	1328	817	1346	1230	761	4	1980	Blank(s)	Blank(s)	Blank(s)	Dead
65-69 years	White	Male	Positive histology	Unknown	Liver	8170	Blank(s)	Blank(s)	Blank(s)	Blank(s)	Blank(s)	Blank(s)	Recommended but not performed, unknown reason	Blank(s)	Blank(s)	Blank(s)	9	Blank(s)	Blank(s)	Blank(s)	Blank(s)	Blank(s)	Blank(s)	Blank(s)	Blank(s)	Blank(s)	Complete dates are available and there are more than 0 days of survival	Liver	1250	851	883	1288	861	1250	1179	819	2	1980	Blank(s)	Blank(s)	Blank(s)	Dead
45-49 years	White	Male	Positive histology	Unknown	Liver	8170	Blank(s)	Blank(s)	Blank(s)	Blank(s)	Blank(s)	Blank(s)	Recommended but not performed, unknown reason	Blank(s)	Blank(s)	Blank(s)	9	Blank(s)	Blank(s)	Blank(s)	Blank(s)	Blank(s)	Blank(s)	Blank(s)	Blank(s)	Blank(s)	Complete dates are available and there are more than 0 days of survival	Liver	1324	776	784	1328	817	1346	1230	761	1	1975	Blank(s)	Blank(s)	Blank(s)	Dead
65-69 years	White	Male	Radiography without microscopic confirm	Unknown	Liver	8170	Blank(s)	Blank(s)	Blank(s)	Blank(s)	Blank(s)	Blank(s)	Recommended but not performed, unknown reason	Blank(s)	Blank(s)	Blank(s)	9	Blank(s)	Blank(s)	Blank(s)	Blank(s)	Blank(s)	Blank(s)	Blank(s)	Blank(s)	Blank(s)	Complete dates are available and there are more than 0 days of survival	Liver	1250	851	883	1288	861	1250	1179	819	3	1979	Blank(s)	Blank(s)	Blank(s)	Dead
80-84 years	White	Female	Positive exfoliative cytology, no positive histology	Unknown	Liver	8170	Blank(s)	Blank(s)	Blank(s)	Blank(s)	Blank(s)	Blank(s)	Recommended but not performed, unknown reason	Blank(s)	Blank(s)	Blank(s)	9	Blank(s)	Blank(s)	Blank(s)	Blank(s)	Blank(s)	Blank(s)	Blank(s)	Blank(s)	Blank(s)	Complete dates are available and there are more than 0 days of survival	Liver	833	495	534	878	444	774	723	419	1	1980	Blank(s)	Blank(s)	Blank(s)	Dead
40-44 years	White	Male	Positive histology	Unknown	Liver	8170	Blank(s)	Blank(s)	Blank(s)	Blank(s)	Blank(s)	Blank(s)	Recommended but not performed, unknown reason	Blank(s)	Blank(s)	Blank(s)	9	Blank(s)	Blank(s)	Blank(s)	Blank(s)	Blank(s)	Blank(s)	Blank(s)	Blank(s)	Blank(s)	Complete dates are available and there are more than 0 days of survival	Liver	1324	776	784	1328	817	1346	1230	761	3	1978	Blank(s)	Blank(s)	Blank(s)	Dead
60-64 years	White	Female	Positive exfoliative cytology, no positive histology	Unknown	Liver	8170	Blank(s)	Blank(s)	88	Blank(s)	Blank(s)	Blank(s)	Not recommended	Blank(s)	Blank(s)	Blank(s)	0	Blank(s)	0	Blank(s)	Blank(s)	Blank(s)	Blank(s)	Blank(s)	Blank(s)	Blank(s)	Complete dates are available and there are more than 0 days of survival	Stomach and Duodenal Ulcers	1250	851	883	1288	861	1250	1179	819	4	1993	Blank(s)	Blank(s)	Blank(s)	Dead
75-79 years	Black	Male	Radiography without microscopic confirm	Unknown	Liver	8170	Blank(s)	Blank(s)	Blank(s)	Blank(s)	Blank(s)	Blank(s)	Recommended but not performed, unknown reason	Blank(s)	Blank(s)	Blank(s)	9	Blank(s)	Blank(s)	Blank(s)	Blank(s)	Blank(s)	Blank(s)	Blank(s)	Blank(s)	Blank(s)	Complete dates are available and there are more than 0 days of survival	Liver	1250	851	883	1288	861	1250	1179	819	1	1978	Blank(s)	Blank(s)	Blank(s)	Dead
75-79 years	White	Male	Positive histology	Unknown	Liver	8170	Blank(s)	Blank(s)	Blank(s)	Blank(s)	Blank(s)	Blank(s)	Recommended but not performed, unknown reason	Blank(s)	Blank(s)	Blank(s)	9	Blank(s)	Blank(s)	Blank(s)	Blank(s)	Blank(s)	Blank(s)	Blank(s)	Blank(s)	Blank(s)	Complete dates are available and there are more than 0 days of survival	Liver	797	484	467	759	477	760	695	453	1	1977	Blank(s)	Blank(s)	Blank(s)	Dead
65-69 years	Other (American Indian/AK Native, Asian/Pacific Islander)	Male	Positive histology	Undifferentiated; anaplastic; Grade IV	Liver	8170	Blank(s)	Blank(s)	Blank(s)	Blank(s)	Blank(s)	Blank(s)	Recommended but not performed, unknown reason	Blank(s)	Blank(s)	Blank(s)	9	Blank(s)	Blank(s)	Blank(s)	Blank(s)	Blank(s)	Blank(s)	Blank(s)	Blank(s)	Blank(s)	Complete dates are available and there are more than 0 days of survival	Liver	797	484	467	759	477	760	695	453	4	1978	Blank(s)	Blank(s)	Blank(s)	Dead
65-69 years	White	Male	Positive histology	Poorly differentiated; Grade III	Liver	8010	Blank(s)	Blank(s)	Blank(s)	Blank(s)	Blank(s)	Blank(s)	Recommended but not performed, unknown reason	Blank(s)	Blank(s)	Blank(s)	9	Blank(s)	Blank(s)	Blank(s)	Blank(s)	Blank(s)	Blank(s)	Blank(s)	Blank(s)	Blank(s)	Complete dates are available and there are more than 0 days of survival	Liver	1324	776	784	1328	817	1346	1230	761	5	1977	Blank(s)	Blank(s)	Blank(s)	Dead
60-64 years	White	Male	Positive histology	Poorly differentiated; Grade III	Liver	8140	Blank(s)	Blank(s)	Blank(s)	Blank(s)	Blank(s)	Blank(s)	Recommended but not performed, unknown reason	Blank(s)	Blank(s)	Blank(s)	9	Blank(s)	Blank(s)	Blank(s)	Blank(s)	Blank(s)	Blank(s)	Blank(s)	Blank(s)	Blank(s)	Complete dates are available and there are more than 0 days of survival	Liver	1250	851	883	1288	861	1250	1179	819	72	1975	Blank(s)	Blank(s)	Blank(s)	Dead
45-49 years	Other (American Indian/AK Native, Asian/Pacific Islander)	Male	Positive histology	Well differentiated; Grade I	Liver	8170	Blank(s)	Blank(s)	Blank(s)	Blank(s)	Blank(s)	Blank(s)	Surgery performed	Blank(s)	Blank(s)	Blank(s)	90	Blank(s)	Blank(s)	Blank(s)	Blank(s)	Blank(s)	Blank(s)	Blank(s)	Blank(s)	Blank(s)	Complete dates are available and there are more than 0 days of survival	Liver	1324	776	784	1328	817	1346	1230	761	9	1978	Blank(s)	Blank(s)	Blank(s)	Dead
65-69 years	Other (American Indian/AK Native, Asian/Pacific Islander)	Male	Radiography without microscopic confirm	Unknown	Liver	8170	Blank(s)	Blank(s)	Blank(s)	Blank(s)	Blank(s)	Blank(s)	Recommended but not performed, unknown reason	Blank(s)	Blank(s)	Blank(s)	9	Blank(s)	Blank(s)	Blank(s)	Blank(s)	Blank(s)	Blank(s)	Blank(s)	Blank(s)	Blank(s)	Complete dates are available and there are more than 0 days of survival	Diabetes Mellitus	1324	776	784	1328	817	1346	1230	761	133	1980	Blank(s)	Blank(s)	Blank(s)	Dead
75-79 years	White	Male	Positive histology	Moderately differentiated; Grade II	Liver	8481	Blank(s)	Blank(s)	Blank(s)	Blank(s)	Blank(s)	Blank(s)	Recommended but not performed, unknown reason	Blank(s)	Blank(s)	Blank(s)	9	Blank(s)	Blank(s)	Blank(s)	Blank(s)	Blank(s)	Blank(s)	Blank(s)	Blank(s)	Blank(s)	Complete dates are available and there are more than 0 days of survival	Liver	1324	776	784	1328	817	1346	1230	761	7	1978	Blank(s)	Blank(s)	Blank(s)	Dead
70-74 years	White	Female	Positive histology	Moderately differentiated; Grade II	Liver	8170	Blank(s)	Blank(s)	Blank(s)	Blank(s)	Blank(s)	Blank(s)	Recommended but not performed, unknown reason	Blank(s)	Blank(s)	Blank(s)	9	Blank(s)	Blank(s)	Blank(s)	Blank(s)	Blank(s)	Blank(s)	Blank(s)	Blank(s)	Blank(s)	Complete dates are available and there are more than 0 days of survival	Liver	833	495	534	878	444	774	723	419	5	1979	Blank(s)	Blank(s)	Blank(s)	Dead
75-79 years	Other (American Indian/AK Native, Asian/Pacific Islander)	Male	Positive histology	Unknown	Liver	8170	Blank(s)	Blank(s)	Blank(s)	Blank(s)	Blank(s)	Blank(s)	Recommended but not performed, unknown reason	Blank(s)	Blank(s)	Blank(s)	9	Blank(s)	Blank(s)	Blank(s)	Blank(s)	Blank(s)	Blank(s)	Blank(s)	Blank(s)	Blank(s)	Complete dates are available and there are more than 0 days of survival	Liver	1324	776	784	1328	817	1346	1230	761	1	1978	Blank(s)	Blank(s)	Blank(s)	Dead
55-59 years	Other (American Indian/AK Native, Asian/Pacific Islander)	Male	Positive histology	Unknown	Liver	8170	Blank(s)	Blank(s)	Blank(s)	Blank(s)	Blank(s)	Blank(s)	Surgery performed	Blank(s)	Blank(s)	Blank(s)	90	Blank(s)	Blank(s)	Blank(s)	Blank(s)	Blank(s)	Blank(s)	Blank(s)	Blank(s)	Blank(s)	Complete dates are available and there are more than 0 days of survival	Liver	1324	776	784	1328	817	1346	1230	761	12	1978	Blank(s)	Blank(s)	Blank(s)	Dead
85+ years	White	Male	Positive histology	Unknown	Liver	8170	Blank(s)	Blank(s)	Blank(s)	Blank(s)	Blank(s)	Blank(s)	Recommended but not performed, unknown reason	Blank(s)	Blank(s)	Blank(s)	9	Blank(s)	Blank(s)	Blank(s)	Blank(s)	Blank(s)	Blank(s)	Blank(s)	Blank(s)	Blank(s)	Complete dates are available and there are more than 0 days of survival	Liver	797	484	467	759	477	760	695	453	12	1978	Blank(s)	Blank(s)	Blank(s)	Dead
80-84 years	White	Female	Positive histology	Unknown	Liver	8170	Blank(s)	Blank(s)	Blank(s)	Blank(s)	Blank(s)	Blank(s)	Recommended but not performed, unknown reason	Blank(s)	Blank(s)	Blank(s)	9	Blank(s)	Blank(s)	Blank(s)	Blank(s)	Blank(s)	Blank(s)	Blank(s)	Blank(s)	Blank(s)	Complete dates are available and there are more than 0 days of survival	Liver	1250	851	883	1288	861	1250	1179	819	2	1975	Blank(s)	Blank(s)	Blank(s)	Dead
75-79 years	White	Male	Positive histology	Unknown	Liver	8190	Blank(s)	Blank(s)	Blank(s)	Blank(s)	Blank(s)	Blank(s)	Recommended but not performed, unknown reason	Blank(s)	Blank(s)	Blank(s)	9	Blank(s)	Blank(s)	Blank(s)	Blank(s)	Blank(s)	Blank(s)	Blank(s)	Blank(s)	Blank(s)	Complete dates are available and there are more than 0 days of survival	Liver	1250	851	883	1288	861	1250	1179	819	25	1984	Blank(s)	Blank(s)	Blank(s)	Dead
65-69 years	White	Female	Positive histology	Unknown	BileDuctsIntraHepat	8180	Blank(s)	Blank(s)	Blank(s)	Blank(s)	Blank(s)	Blank(s)	Recommended but not performed, unknown reason	Blank(s)	Blank(s)	Blank(s)	9	Blank(s)	Blank(s)	Blank(s)	Blank(s)	Blank(s)	Blank(s)	Blank(s)	Blank(s)	Blank(s)	Complete dates are available and there are more than 0 days of survival	Liver	797	484	467	759	477	760	695	453	1	1978	Blank(s)	Blank(s)	Blank(s)	Dead
75-79 years	Other (American Indian/AK Native, Asian/Pacific Islander)	Female	Unknown	Unknown	Liver	8010	Blank(s)	Blank(s)	Blank(s)	Blank(s)	Blank(s)	Blank(s)	Unknown; death certificate; or autopsy only (2003+)	Blank(s)	Blank(s)	Blank(s)	9	Blank(s)	Blank(s)	Blank(s)	Blank(s)	Blank(s)	Blank(s)	Blank(s)	Blank(s)	Blank(s)	Not calculated because a Death Certificate Only or Autopsy Only case	Liver	1250	851	883	1288	861	1250	1179	819	Unknown	1976	Blank(s)	Blank(s)	Blank(s)	Dead
65-69 years	White	Male	Positive histology	Unknown	Liver	8170	Blank(s)	Blank(s)	Blank(s)	Blank(s)	Blank(s)	Blank(s)	Recommended but not performed, unknown reason	Blank(s)	Blank(s)	Blank(s)	9	Blank(s)	Blank(s)	Blank(s)	Blank(s)	Blank(s)	Blank(s)	Blank(s)	Blank(s)	Blank(s)	Complete dates are available and there are more than 0 days of survival	Liver	1324	776	784	1328	817	1346	1230	761	1	1977	Blank(s)	Blank(s)	Blank(s)	Dead
50-54 years	Black	Male	Positive histology	Unknown	Liver	8170	Blank(s)	Blank(s)	Blank(s)	Blank(s)	Blank(s)	Blank(s)	Recommended but not performed, unknown reason	Blank(s)	Blank(s)	Blank(s)	9	Blank(s)	Blank(s)	Blank(s)	Blank(s)	Blank(s)	Blank(s)	Blank(s)	Blank(s)	Blank(s)	Complete dates are available and there are more than 0 days of survival	Liver	1324	776	784	1328	817	1346	1230	761	0	1977	Blank(s)	Blank(s)	Blank(s)	Dead
45-49 years	White	Male	Positive histology	Unknown	BileDuctsIntraHepat	8180	Blank(s)	Blank(s)	Blank(s)	Blank(s)	Blank(s)	Blank(s)	Recommended but not performed, unknown reason	Blank(s)	Blank(s)	Blank(s)	9	Blank(s)	Blank(s)	Blank(s)	Blank(s)	Blank(s)	Blank(s)	Blank(s)	Blank(s)	Blank(s)	Complete dates are available and there are more than 0 days of survival	Liver	833	495	534	878	444	774	723	419	2	1978	Blank(s)	Blank(s)	Blank(s)	Dead
80-84 years	White	Female	Positive histology	Unknown	Liver	8170	Blank(s)	Blank(s)	88	0	Blank(s)	Blank(s)	Not recommended	0	0	0	Blank(s)	Blank(s)	0	Blank(s)	Blank(s)	Blank(s)	Blank(s)	Blank(s)	Blank(s)	Blank(s)	Complete dates are available and there are more than 0 days of survival	Liver	1085	781	766	1065	760	1053	988	715	2	2001	Blank(s)	Blank(s)	Blank(s)	Dead
85+ years	White	Female	Radiography without microscopic confirm	Unknown	Liver	8010	Blank(s)	Blank(s)	Blank(s)	Blank(s)	Blank(s)	Blank(s)	Recommended but not performed, unknown reason	Blank(s)	Blank(s)	Blank(s)	9	Blank(s)	Blank(s)	Blank(s)	Blank(s)	Blank(s)	Blank(s)	Blank(s)	Blank(s)	Blank(s)	Complete dates are available and there are more than 0 days of survival	Liver	1250	851	883	1288	861	1250	1179	819	7	1979	Blank(s)	Blank(s)	Blank(s)	Dead
45-49 years	Other (American Indian/AK Native, Asian/Pacific Islander)	Male	Positive histology	Unknown	Liver	8170	Blank(s)	Blank(s)	Blank(s)	Blank(s)	Blank(s)	Blank(s)	Surgery performed	Blank(s)	Blank(s)	Blank(s)	90	Blank(s)	Blank(s)	Blank(s)	Blank(s)	Blank(s)	Blank(s)	Blank(s)	Blank(s)	Blank(s)	Complete dates are available and there are more than 0 days of survival	Miscellaneous Malignant Cancer	1324	776	784	1328	817	1346	1230	761	48	1979	Blank(s)	Blank(s)	Blank(s)	Dead
65-69 years	Black	Male	Positive histology	Unknown	Liver	8170	Blank(s)	Blank(s)	Blank(s)	Blank(s)	Blank(s)	Blank(s)	Recommended but not performed, unknown reason	Blank(s)	Blank(s)	Blank(s)	9	Blank(s)	Blank(s)	Blank(s)	Blank(s)	Blank(s)	Blank(s)	Blank(s)	Blank(s)	Blank(s)	Complete dates are available and there are more than 0 days of survival	Diseases of Heart	1250	851	883	1288	861	1250	1179	819	15	1979	Blank(s)	Blank(s)	Blank(s)	Dead
55-59 years	White	Male	Positive histology	Unknown	Liver	8170	Blank(s)	Blank(s)	Blank(s)	Blank(s)	Blank(s)	Blank(s)	Recommended but not performed, unknown reason	Blank(s)	Blank(s)	Blank(s)	9	Blank(s)	Blank(s)	Blank(s)	Blank(s)	Blank(s)	Blank(s)	Blank(s)	Blank(s)	Blank(s)	Incomplete dates are available and there could be zero days of follow-up	Liver	1085	781	766	1065	760	1053	988	715	0	1975	Blank(s)	Blank(s)	Blank(s)	Dead
70-74 years	White	Female	Positive histology	Well differentiated; Grade I	Liver	8170	Blank(s)	Blank(s)	Blank(s)	Blank(s)	Blank(s)	Blank(s)	Recommended but not performed, unknown reason	Blank(s)	Blank(s)	Blank(s)	9	Blank(s)	Blank(s)	Blank(s)	Blank(s)	Blank(s)	Blank(s)	Blank(s)	Blank(s)	Blank(s)	Complete dates are available and there are more than 0 days of survival	Liver	1085	781	766	1065	760	1053	988	715	4	1981	Blank(s)	Blank(s)	Blank(s)	Dead
75-79 years	Black	Female	Positive exfoliative cytology, no positive histology	Unknown	Liver	8170	Blank(s)	Blank(s)	Blank(s)	Blank(s)	Blank(s)	Blank(s)	Recommended but not performed, unknown reason	Blank(s)	Blank(s)	Blank(s)	9	Blank(s)	Blank(s)	Blank(s)	Blank(s)	Blank(s)	Blank(s)	Blank(s)	Blank(s)	Blank(s)	Complete dates are available and there are more than 0 days of survival	Liver	1250	851	883	1288	861	1250	1179	819	2	1979	Blank(s)	Blank(s)	Blank(s)	Dead
60-64 years	White	Male	Positive histology	Unknown	Liver	8170	Blank(s)	Blank(s)	Blank(s)	Blank(s)	Blank(s)	Blank(s)	Recommended but not performed, unknown reason	Blank(s)	Blank(s)	Blank(s)	9	Blank(s)	Blank(s)	Blank(s)	Blank(s)	Blank(s)	Blank(s)	Blank(s)	Blank(s)	Blank(s)	Complete dates are available and there are more than 0 days of survival	Liver	797	484	467	759	477	760	695	453	2	1980	Blank(s)	Blank(s)	Blank(s)	Dead
50-54 years	Black	Female	Positive histology	Unknown	Liver	8170	Blank(s)	Blank(s)	Blank(s)	Blank(s)	Blank(s)	Blank(s)	Recommended but not performed, unknown reason	Blank(s)	Blank(s)	Blank(s)	9	Blank(s)	Blank(s)	Blank(s)	Blank(s)	Blank(s)	Blank(s)	Blank(s)	Blank(s)	Blank(s)	Complete dates are available and there are more than 0 days of survival	Liver	1250	851	883	1288	861	1250	1179	819	0	1980	Blank(s)	Blank(s)	Blank(s)	Dead
70-74 years	White	Female	Positive histology	Unknown	Liver	8170	Blank(s)	Blank(s)	Blank(s)	Blank(s)	Blank(s)	Blank(s)	Surgery performed	Blank(s)	Blank(s)	Blank(s)	90	Blank(s)	Blank(s)	Blank(s)	Blank(s)	Blank(s)	Blank(s)	Blank(s)	Blank(s)	Blank(s)	Complete dates are available and there are more than 0 days of survival	Liver	1250	851	883	1288	861	1250	1179	819	1	1980	Blank(s)	Blank(s)	Blank(s)	Dead
85+ years	White	Female	Unknown	Unknown	Liver	8010	Blank(s)	Blank(s)	Blank(s)	Blank(s)	Blank(s)	Blank(s)	Unknown; death certificate; or autopsy only (2003+)	Blank(s)	Blank(s)	Blank(s)	9	Blank(s)	Blank(s)	Blank(s)	Blank(s)	Blank(s)	Blank(s)	Blank(s)	Blank(s)	Blank(s)	Not calculated because a Death Certificate Only or Autopsy Only case	Miscellaneous Malignant Cancer	1324	776	784	1328	817	1346	1230	761	Unknown	1975	Blank(s)	Blank(s)	Blank(s)	Dead
65-69 years	White	Male	Positive histology	Unknown	Liver	8170	Blank(s)	Blank(s)	Blank(s)	Blank(s)	Blank(s)	Blank(s)	Recommended but not performed, unknown reason	Blank(s)	Blank(s)	Blank(s)	9	Blank(s)	Blank(s)	Blank(s)	Blank(s)	Blank(s)	Blank(s)	Blank(s)	Blank(s)	Blank(s)	Complete dates are available and there are more than 0 days of survival	Liver	1324	776	784	1328	817	1346	1230	761	22	1983	Blank(s)	Blank(s)	Blank(s)	Dead
45-49 years	White	Male	Positive histology	Unknown	Liver	8170	Blank(s)	Blank(s)	Blank(s)	Blank(s)	Blank(s)	Blank(s)	Recommended but not performed, unknown reason	Blank(s)	Blank(s)	Blank(s)	9	Blank(s)	Blank(s)	Blank(s)	Blank(s)	Blank(s)	Blank(s)	Blank(s)	Blank(s)	Blank(s)	Complete dates are available and there are more than 0 days of survival	Liver	1250	851	883	1288	861	1250	1179	819	0	1980	Blank(s)	Blank(s)	Blank(s)	Dead
65-69 years	Black	Male	Positive histology	Unknown	Liver	9120	Blank(s)	Blank(s)	Blank(s)	Blank(s)	Blank(s)	Blank(s)	Not recommended, contraindicated due to other cond; autopsy only (1973-2002)	Blank(s)	Blank(s)	Blank(s)	0	Blank(s)	Blank(s)	Blank(s)	Blank(s)	Blank(s)	Blank(s)	Blank(s)	Blank(s)	Blank(s)	Not calculated because a Death Certificate Only or Autopsy Only case	Cerebrovascular Diseases	1250	851	883	1288	861	1250	1179	819	Unknown	1976	Blank(s)	Blank(s)	Blank(s)	Dead
70-74 years	White	Female	Clinical diagnosis only	Unknown	Liver	8170	IVA	IIIC	Blank(s)	0	None	None; diagnosed at autopsy	Not recommended	Blank(s)	Blank(s)	Blank(s)	Blank(s)	Blank(s)	0	43	630	100	0	0	10	1	Complete dates are available and there are more than 0 days of survival	Liver	1085	781	766	1065	760	1053	988	715	1	2012	T3b	N1	M0	Dead
75-79 years	White	Female	Positive histology	Unknown	Liver	8140	Blank(s)	Blank(s)	Blank(s)	Blank(s)	Blank(s)	Blank(s)	Recommended but not performed, unknown reason	Blank(s)	Blank(s)	Blank(s)	9	Blank(s)	Blank(s)	Blank(s)	Blank(s)	Blank(s)	Blank(s)	Blank(s)	Blank(s)	Blank(s)	Complete dates are available and there are more than 0 days of survival	Liver	1250	851	883	1288	861	1250	1179	819	3	1975	Blank(s)	Blank(s)	Blank(s)	Dead
60-64 years	White	Male	Positive histology	Well differentiated; Grade I	Liver	8170	Blank(s)	Blank(s)	Blank(s)	Blank(s)	Blank(s)	Blank(s)	Recommended but not performed, unknown reason	Blank(s)	Blank(s)	Blank(s)	9	Blank(s)	Blank(s)	Blank(s)	Blank(s)	Blank(s)	Blank(s)	Blank(s)	Blank(s)	Blank(s)	Complete dates are available and there are more than 0 days of survival	Liver	1324	776	784	1328	817	1346	1230	761	1	1978	Blank(s)	Blank(s)	Blank(s)	Dead
60-64 years	Black	Male	Positive histology	Unknown	Liver	8170	Blank(s)	Blank(s)	Blank(s)	Blank(s)	Blank(s)	Blank(s)	Surgery performed	Blank(s)	Blank(s)	Blank(s)	90	Blank(s)	Blank(s)	Blank(s)	Blank(s)	Blank(s)	Blank(s)	Blank(s)	Blank(s)	Blank(s)	Complete dates are available and there are more than 0 days of survival	Chronic Liver Disease and Cirrhosis	1250	851	883	1288	861	1250	1179	819	78	1979	Blank(s)	Blank(s)	Blank(s)	Dead
75-79 years	White	Female	Positive histology	Poorly differentiated; Grade III	Liver	8170	Blank(s)	Blank(s)	Blank(s)	Blank(s)	Blank(s)	Blank(s)	Recommended but not performed, unknown reason	Blank(s)	Blank(s)	Blank(s)	9	Blank(s)	Blank(s)	Blank(s)	Blank(s)	Blank(s)	Blank(s)	Blank(s)	Blank(s)	Blank(s)	Complete dates are available and there are more than 0 days of survival	Liver	1250	851	883	1288	861	1250	1179	819	0	1977	Blank(s)	Blank(s)	Blank(s)	Dead
65-69 years	White	Male	Positive histology	Well differentiated; Grade I	Liver	8170	Blank(s)	Blank(s)	Blank(s)	Blank(s)	Blank(s)	Blank(s)	Recommended but not performed, unknown reason	Blank(s)	Blank(s)	Blank(s)	9	Blank(s)	Blank(s)	Blank(s)	Blank(s)	Blank(s)	Blank(s)	Blank(s)	Blank(s)	Blank(s)	Complete dates are available and there are more than 0 days of survival	Liver	1324	776	784	1328	817	1346	1230	761	0	1977	Blank(s)	Blank(s)	Blank(s)	Dead
60-64 years	Black	Female	Positive exfoliative cytology, no positive histology	Unknown	Liver	8170	Blank(s)	Blank(s)	88	Blank(s)	Blank(s)	Blank(s)	Not recommended	Blank(s)	Blank(s)	Blank(s)	3	Blank(s)	0	Blank(s)	Blank(s)	Blank(s)	Blank(s)	Blank(s)	Blank(s)	Blank(s)	Complete dates are available and there are more than 0 days of survival	Liver	1250	851	883	1288	861	1250	1179	819	0	1990	Blank(s)	Blank(s)	Blank(s)	Dead
75-79 years	Other (American Indian/AK Native, Asian/Pacific Islander)	Male	Positive histology	Unknown	Liver	8170	Blank(s)	Blank(s)	Blank(s)	Blank(s)	Blank(s)	Blank(s)	Recommended but not performed, unknown reason	Blank(s)	Blank(s)	Blank(s)	9	Blank(s)	Blank(s)	Blank(s)	Blank(s)	Blank(s)	Blank(s)	Blank(s)	Blank(s)	Blank(s)	Complete dates are available and there are more than 0 days of survival	Liver	1324	776	784	1328	817	1346	1230	761	0	1976	Blank(s)	Blank(s)	Blank(s)	Dead
65-69 years	White	Male	Positive histology	Poorly differentiated; Grade III	Liver	8140	Blank(s)	Blank(s)	Blank(s)	Blank(s)	Blank(s)	Blank(s)	Recommended but not performed, unknown reason	Blank(s)	Blank(s)	Blank(s)	9	Blank(s)	Blank(s)	Blank(s)	Blank(s)	Blank(s)	Blank(s)	Blank(s)	Blank(s)	Blank(s)	Complete dates are available and there are more than 0 days of survival	Diseases of Heart	1250	851	883	1288	861	1250	1179	819	2	1980	Blank(s)	Blank(s)	Blank(s)	Dead
60-64 years	White	Male	Positive histology	Unknown	Liver	8140	Blank(s)	Blank(s)	Blank(s)	Blank(s)	Blank(s)	Blank(s)	Recommended but not performed, unknown reason	Blank(s)	Blank(s)	Blank(s)	9	Blank(s)	Blank(s)	Blank(s)	Blank(s)	Blank(s)	Blank(s)	Blank(s)	Blank(s)	Blank(s)	Complete dates are available and there are more than 0 days of survival	Intrahepatic Bile Duct	1085	781	766	1065	760	1053	988	715	32	1975	Blank(s)	Blank(s)	Blank(s)	Dead
55-59 years	White	Male	Positive histology	Unknown	Liver	8170	Blank(s)	Blank(s)	Blank(s)	Blank(s)	Blank(s)	Blank(s)	Not recommended, contraindicated due to other cond; autopsy only (1973-2002)	Blank(s)	Blank(s)	Blank(s)	0	Blank(s)	Blank(s)	Blank(s)	Blank(s)	Blank(s)	Blank(s)	Blank(s)	Blank(s)	Blank(s)	Not calculated because a Death Certificate Only or Autopsy Only case	Chronic Liver Disease and Cirrhosis	1324	776	784	1328	817	1346	1230	761	Unknown	1978	Blank(s)	Blank(s)	Blank(s)	Dead
75-79 years	White	Male	Positive histology	Unknown	Liver	8170	Blank(s)	Blank(s)	Blank(s)	Blank(s)	Blank(s)	Blank(s)	Not recommended, contraindicated due to other cond; autopsy only (1973-2002)	Blank(s)	Blank(s)	Blank(s)	0	Blank(s)	Blank(s)	Blank(s)	Blank(s)	Blank(s)	Blank(s)	Blank(s)	Blank(s)	Blank(s)	Not calculated because a Death Certificate Only or Autopsy Only case	Prostate	1324	776	784	1328	817	1346	1230	761	Unknown	1981	Blank(s)	Blank(s)	Blank(s)	Dead
80-84 years	Black	Male	Positive histology	Unknown	Liver	8170	Blank(s)	I	Blank(s)	0	None	None; diagnosed at autopsy	Not recommended	Blank(s)	Blank(s)	Blank(s)	Blank(s)	Blank(s)	0	70	170	0	0	0	10	999	Complete dates are available and there are more than 0 days of survival	Diseases of Heart	1250	851	883	1288	861	1250	1179	819	3	2007	Blank(s)	Blank(s)	Blank(s)	Dead
65-69 years	White	Male	Positive histology	Unknown	Liver	8010	Blank(s)	Blank(s)	Blank(s)	Blank(s)	Blank(s)	Blank(s)	Recommended but not performed, unknown reason	Blank(s)	Blank(s)	Blank(s)	9	Blank(s)	Blank(s)	Blank(s)	Blank(s)	Blank(s)	Blank(s)	Blank(s)	Blank(s)	Blank(s)	Complete dates are available and there are more than 0 days of survival	Liver	1085	781	766	1065	760	1053	988	715	0	1979	Blank(s)	Blank(s)	Blank(s)	Dead
35-39 years	Black	Male	Positive histology	Unknown	Liver	8170	Blank(s)	Blank(s)	Blank(s)	Blank(s)	Blank(s)	Blank(s)	Recommended but not performed, unknown reason	Blank(s)	Blank(s)	Blank(s)	9	Blank(s)	Blank(s)	Blank(s)	Blank(s)	Blank(s)	Blank(s)	Blank(s)	Blank(s)	Blank(s)	Complete dates are available and there are more than 0 days of survival	Chronic Liver Disease and Cirrhosis	1324	776	784	1328	817	1346	1230	761	3	1978	Blank(s)	Blank(s)	Blank(s)	Dead
55-59 years	Other (American Indian/AK Native, Asian/Pacific Islander)	Female	Positive histology	Poorly differentiated; Grade III	Liver	8170	Blank(s)	Blank(s)	Blank(s)	Blank(s)	Blank(s)	Blank(s)	Recommended but not performed, unknown reason	Blank(s)	Blank(s)	Blank(s)	9	Blank(s)	Blank(s)	Blank(s)	Blank(s)	Blank(s)	Blank(s)	Blank(s)	Blank(s)	Blank(s)	Complete dates are available and there are more than 0 days of survival	Liver	1324	776	784	1328	817	1346	1230	761	1	1979	Blank(s)	Blank(s)	Blank(s)	Dead
65-69 years	Other (American Indian/AK Native, Asian/Pacific Islander)	Male	Clinical diagnosis only	Unknown	Liver	8170	Blank(s)	Blank(s)	Blank(s)	Blank(s)	Blank(s)	Blank(s)	Recommended but not performed, unknown reason	Blank(s)	Blank(s)	Blank(s)	9	Blank(s)	Blank(s)	Blank(s)	Blank(s)	Blank(s)	Blank(s)	Blank(s)	Blank(s)	Blank(s)	Complete dates are available and there are more than 0 days of survival	Liver	1250	851	883	1288	861	1250	1179	819	0	1977	Blank(s)	Blank(s)	Blank(s)	Dead
80-84 years	Other (American Indian/AK Native, Asian/Pacific Islander)	Male	Positive histology	Unknown	Liver	8170	Blank(s)	Blank(s)	Blank(s)	Blank(s)	Blank(s)	Blank(s)	Recommended but not performed, unknown reason	Blank(s)	Blank(s)	Blank(s)	9	Blank(s)	Blank(s)	Blank(s)	Blank(s)	Blank(s)	Blank(s)	Blank(s)	Blank(s)	Blank(s)	Complete dates are available and there are more than 0 days of survival	Liver	1324	776	784	1328	817	1346	1230	761	0	1976	Blank(s)	Blank(s)	Blank(s)	Dead
60-64 years	White	Male	Positive histology	Unknown	Liver	8170	Blank(s)	Blank(s)	Blank(s)	Blank(s)	Blank(s)	Blank(s)	Recommended but not performed, unknown reason	Blank(s)	Blank(s)	Blank(s)	9	Blank(s)	Blank(s)	Blank(s)	Blank(s)	Blank(s)	Blank(s)	Blank(s)	Blank(s)	Blank(s)	Complete dates are available and there are more than 0 days of survival	Liver	1250	851	883	1288	861	1250	1179	819	1	1976	Blank(s)	Blank(s)	Blank(s)	Dead
80-84 years	Other (American Indian/AK Native, Asian/Pacific Islander)	Male	Radiography without microscopic confirm	Unknown	Liver	8170	Blank(s)	Blank(s)	Blank(s)	Blank(s)	Blank(s)	Blank(s)	Recommended but not performed, unknown reason	Blank(s)	Blank(s)	Blank(s)	9	Blank(s)	Blank(s)	Blank(s)	Blank(s)	Blank(s)	Blank(s)	Blank(s)	Blank(s)	Blank(s)	Complete dates are available and there are more than 0 days of survival	Liver	1324	776	784	1328	817	1346	1230	761	1	1981	Blank(s)	Blank(s)	Blank(s)	Dead
55-59 years	Other (American Indian/AK Native, Asian/Pacific Islander)	Male	Positive histology	Poorly differentiated; Grade III	Liver	8170	Blank(s)	Blank(s)	Blank(s)	Blank(s)	Blank(s)	Blank(s)	Recommended but not performed, unknown reason	Blank(s)	Blank(s)	Blank(s)	9	Blank(s)	Blank(s)	Blank(s)	Blank(s)	Blank(s)	Blank(s)	Blank(s)	Blank(s)	Blank(s)	Complete dates are available and there are more than 0 days of survival	Liver	1085	781	766	1065	760	1053	988	715	3	1980	Blank(s)	Blank(s)	Blank(s)	Dead
65-69 years	White	Male	Positive histology	Unknown	Liver	8010	Blank(s)	Blank(s)	Blank(s)	Blank(s)	Blank(s)	Blank(s)	Recommended but not performed, unknown reason	Blank(s)	Blank(s)	Blank(s)	9	Blank(s)	Blank(s)	Blank(s)	Blank(s)	Blank(s)	Blank(s)	Blank(s)	Blank(s)	Blank(s)	Complete dates are available and there are more than 0 days of survival	Liver	1085	781	766	1065	760	1053	988	715	1	1978	Blank(s)	Blank(s)	Blank(s)	Dead
75-79 years	White	Female	Positive histology	Moderately differentiated; Grade II	Liver	8170	Blank(s)	Blank(s)	Blank(s)	Blank(s)	Blank(s)	Blank(s)	Recommended but not performed, unknown reason	Blank(s)	Blank(s)	Blank(s)	9	Blank(s)	Blank(s)	Blank(s)	Blank(s)	Blank(s)	Blank(s)	Blank(s)	Blank(s)	Blank(s)	Complete dates are available and there are more than 0 days of survival	Other Urinary Organs	1085	781	766	1065	760	1053	988	715	2	1977	Blank(s)	Blank(s)	Blank(s)	Dead
55-59 years	Other (American Indian/AK Native, Asian/Pacific Islander)	Female	Positive histology	Unknown	Liver	8170	Blank(s)	Blank(s)	Blank(s)	Blank(s)	Blank(s)	Blank(s)	Recommended but not performed, unknown reason	Blank(s)	Blank(s)	Blank(s)	9	Blank(s)	Blank(s)	Blank(s)	Blank(s)	Blank(s)	Blank(s)	Blank(s)	Blank(s)	Blank(s)	Complete dates are available and there are more than 0 days of survival	Liver	1324	776	784	1328	817	1346	1230	761	2	1977	Blank(s)	Blank(s)	Blank(s)	Dead
65-69 years	White	Male	Positive histology	Unknown	Liver	8170	Blank(s)	Blank(s)	Blank(s)	Blank(s)	Blank(s)	Blank(s)	Not recommended, contraindicated due to other cond; autopsy only (1973-2002)	Blank(s)	Blank(s)	Blank(s)	0	Blank(s)	Blank(s)	Blank(s)	Blank(s)	Blank(s)	Blank(s)	Blank(s)	Blank(s)	Blank(s)	Not calculated because a Death Certificate Only or Autopsy Only case	Chronic Liver Disease and Cirrhosis	797	484	467	759	477	760	695	453	Unknown	1987	Blank(s)	Blank(s)	Blank(s)	Dead
80-84 years	White	Female	Radiography without microscopic confirm	Unknown	Liver	8170	Blank(s)	II	Blank(s)	0	None	None; diagnosed at autopsy	Not recommended	Blank(s)	Blank(s)	Blank(s)	Blank(s)	Blank(s)	0	30	390	0	0	0	999	1	Complete dates are available and there are more than 0 days of survival	Chronic Liver Disease and Cirrhosis	1250	851	883	1288	861	1250	1179	819	41	2005	Blank(s)	Blank(s)	Blank(s)	Dead
85+ years	White	Male	Radiography without microscopic confirm	Unknown	Liver	8010	Blank(s)	Blank(s)	Blank(s)	Blank(s)	Blank(s)	Blank(s)	Recommended but not performed, unknown reason	Blank(s)	Blank(s)	Blank(s)	9	Blank(s)	Blank(s)	Blank(s)	Blank(s)	Blank(s)	Blank(s)	Blank(s)	Blank(s)	Blank(s)	Complete dates are available and there are more than 0 days of survival	Liver	1324	776	784	1328	817	1346	1230	761	1	1979	Blank(s)	Blank(s)	Blank(s)	Dead
70-74 years	White	Male	Positive histology	Well differentiated; Grade I	Liver	8140	Blank(s)	Blank(s)	Blank(s)	Blank(s)	Blank(s)	Blank(s)	Recommended but not performed, unknown reason	Blank(s)	Blank(s)	Blank(s)	9	Blank(s)	Blank(s)	Blank(s)	Blank(s)	Blank(s)	Blank(s)	Blank(s)	Blank(s)	Blank(s)	Complete dates are available and there are more than 0 days of survival	Liver	1250	851	883	1288	861	1250	1179	819	0	1977	Blank(s)	Blank(s)	Blank(s)	Dead
60-64 years	Other (American Indian/AK Native, Asian/Pacific Islander)	Male	Positive histology	Unknown	Liver	8170	Blank(s)	Blank(s)	Blank(s)	Blank(s)	Blank(s)	Blank(s)	Recommended but not performed, unknown reason	Blank(s)	Blank(s)	Blank(s)	9	Blank(s)	Blank(s)	Blank(s)	Blank(s)	Blank(s)	Blank(s)	Blank(s)	Blank(s)	Blank(s)	Complete dates are available and there are more than 0 days of survival	Liver	797	484	467	759	477	760	695	453	0	1977	Blank(s)	Blank(s)	Blank(s)	Dead
60-64 years	White	Female	Positive histology	Unknown	Liver	8170	Blank(s)	Blank(s)	Blank(s)	Blank(s)	Blank(s)	Blank(s)	Surgery performed	Blank(s)	Blank(s)	Blank(s)	90	Blank(s)	Blank(s)	Blank(s)	Blank(s)	Blank(s)	Blank(s)	Blank(s)	Blank(s)	Blank(s)	Complete dates are available and there are more than 0 days of survival	Liver	1324	776	784	1328	817	1346	1230	761	10	1980	Blank(s)	Blank(s)	Blank(s)	Dead
40-44 years	White	Female	Positive histology	Unknown	Liver	8170	Blank(s)	Blank(s)	Blank(s)	Blank(s)	Blank(s)	Blank(s)	Recommended but not performed, unknown reason	Blank(s)	Blank(s)	Blank(s)	9	Blank(s)	Blank(s)	Blank(s)	Blank(s)	Blank(s)	Blank(s)	Blank(s)	Blank(s)	Blank(s)	Complete dates are available and there are more than 0 days of survival	Liver	1250	851	883	1288	861	1250	1179	819	4	1978	Blank(s)	Blank(s)	Blank(s)	Dead
65-69 years	White	Female	Radiography without microscopic confirm	Unknown	Liver	8970	Blank(s)	Blank(s)	88	Blank(s)	Blank(s)	Blank(s)	Not recommended	Blank(s)	Blank(s)	Blank(s)	0	Blank(s)	0	Blank(s)	Blank(s)	Blank(s)	Blank(s)	Blank(s)	Blank(s)	Blank(s)	Complete dates are available and there are more than 0 days of survival	Liver	1085	781	766	1065	760	1053	988	715	0	1997	Blank(s)	Blank(s)	Blank(s)	Dead
70-74 years	White	Female	Radiography without microscopic confirm	Unknown	Liver	8010	Blank(s)	Blank(s)	Blank(s)	Blank(s)	Blank(s)	Blank(s)	Recommended but not performed, unknown reason	Blank(s)	Blank(s)	Blank(s)	9	Blank(s)	Blank(s)	Blank(s)	Blank(s)	Blank(s)	Blank(s)	Blank(s)	Blank(s)	Blank(s)	Incomplete dates are available and there cannot be zero days of follow-up	Liver	1250	851	883	1288	861	1250	1179	819	8	1975	Blank(s)	Blank(s)	Blank(s)	Dead
45-49 years	Other (American Indian/AK Native, Asian/Pacific Islander)	Male	Positive histology	Unknown	Liver	8170	Blank(s)	Blank(s)	Blank(s)	Blank(s)	Blank(s)	Blank(s)	Recommended but not performed, unknown reason	Blank(s)	Blank(s)	Blank(s)	9	Blank(s)	Blank(s)	Blank(s)	Blank(s)	Blank(s)	Blank(s)	Blank(s)	Blank(s)	Blank(s)	Complete dates are available and there are more than 0 days of survival	Miscellaneous Malignant Cancer	1324	776	784	1328	817	1346	1230	761	5	1977	Blank(s)	Blank(s)	Blank(s)	Dead
55-59 years	Black	Male	Positive histology	Unknown	Liver	8170	Blank(s)	Blank(s)	Blank(s)	Blank(s)	Blank(s)	Blank(s)	Recommended but not performed, unknown reason	Blank(s)	Blank(s)	Blank(s)	9	Blank(s)	Blank(s)	Blank(s)	Blank(s)	Blank(s)	Blank(s)	Blank(s)	Blank(s)	Blank(s)	Complete dates are available and there are more than 0 days of survival	Liver	1250	851	883	1288	861	1250	1179	819	0	1978	Blank(s)	Blank(s)	Blank(s)	Dead
55-59 years	White	Male	Positive histology	Unknown	Liver	8170	Blank(s)	Blank(s)	Blank(s)	Blank(s)	Blank(s)	Blank(s)	Recommended but not performed, unknown reason	Blank(s)	Blank(s)	Blank(s)	9	Blank(s)	Blank(s)	Blank(s)	Blank(s)	Blank(s)	Blank(s)	Blank(s)	Blank(s)	Blank(s)	Complete dates are available and there are more than 0 days of survival	Liver	833	495	534	878	444	774	723	419	3	1979	Blank(s)	Blank(s)	Blank(s)	Dead
70-74 years	White	Male	Positive histology	Unknown	Liver	8170	Blank(s)	Blank(s)	Blank(s)	Blank(s)	Blank(s)	Blank(s)	Not recommended, contraindicated due to other cond; autopsy only (1973-2002)	Blank(s)	Blank(s)	Blank(s)	0	Blank(s)	Blank(s)	Blank(s)	Blank(s)	Blank(s)	Blank(s)	Blank(s)	Blank(s)	Blank(s)	Not calculated because a Death Certificate Only or Autopsy Only case	Liver	1324	776	784	1328	817	1346	1230	761	Unknown	1975	Blank(s)	Blank(s)	Blank(s)	Dead
80-84 years	Black	Female	Radiography without microscopic confirm	Unknown	Liver	8170	Blank(s)	Blank(s)	Blank(s)	Blank(s)	Blank(s)	Blank(s)	Recommended but not performed, unknown reason	Blank(s)	Blank(s)	Blank(s)	9	Blank(s)	Blank(s)	Blank(s)	Blank(s)	Blank(s)	Blank(s)	Blank(s)	Blank(s)	Blank(s)	Complete dates are available and there are more than 0 days of survival	Liver	1085	781	766	1065	760	1053	988	715	4	1978	Blank(s)	Blank(s)	Blank(s)	Dead
70-74 years	White	Male	Positive histology	Unknown	Liver	8170	Blank(s)	Blank(s)	Blank(s)	Blank(s)	Blank(s)	Blank(s)	Recommended but not performed, unknown reason	Blank(s)	Blank(s)	Blank(s)	9	Blank(s)	Blank(s)	Blank(s)	Blank(s)	Blank(s)	Blank(s)	Blank(s)	Blank(s)	Blank(s)	Complete dates are available and there are more than 0 days of survival	Chronic Obstructive Pulmonary Disease and Allied Cond	1324	776	784	1328	817	1346	1230	761	0	1977	Blank(s)	Blank(s)	Blank(s)	Dead
75-79 years	White	Female	Positive exfoliative cytology, no positive histology	Unknown	Liver	8170	Blank(s)	Blank(s)	Blank(s)	Blank(s)	Blank(s)	Blank(s)	Recommended but not performed, unknown reason	Blank(s)	Blank(s)	Blank(s)	9	Blank(s)	Blank(s)	Blank(s)	Blank(s)	Blank(s)	Blank(s)	Blank(s)	Blank(s)	Blank(s)	Complete dates are available and there are more than 0 days of survival	Liver	1324	776	784	1328	817	1346	1230	761	15	1977	Blank(s)	Blank(s)	Blank(s)	Dead
55-59 years	White	Female	Positive histology	Well differentiated; Grade I	Liver	8170	Blank(s)	Blank(s)	88	30	Blank(s)	Blank(s)	Surgery performed	0	0	0	Blank(s)	Blank(s)	0	Blank(s)	Blank(s)	Blank(s)	Blank(s)	Blank(s)	Blank(s)	Blank(s)	Complete dates are available and there are more than 0 days of survival	Alive	1250	851	883	1288	861	1250	1179	819	175	2002	Blank(s)	Blank(s)	Blank(s)	Alive
65-69 years	White	Male	Positive histology	Unknown	Liver	8170	Blank(s)	Blank(s)	Blank(s)	Blank(s)	Blank(s)	Blank(s)	Recommended but not performed, unknown reason	Blank(s)	Blank(s)	Blank(s)	9	Blank(s)	Blank(s)	Blank(s)	Blank(s)	Blank(s)	Blank(s)	Blank(s)	Blank(s)	Blank(s)	Complete dates are available and there are more than 0 days of survival	Liver	833	495	534	878	444	774	723	419	0	1975	Blank(s)	Blank(s)	Blank(s)	Dead
65-69 years	White	Male	Positive histology	Unknown	Liver	8170	Blank(s)	Blank(s)	Blank(s)	Blank(s)	Blank(s)	Blank(s)	Recommended but not performed, unknown reason	Blank(s)	Blank(s)	Blank(s)	9	Blank(s)	Blank(s)	Blank(s)	Blank(s)	Blank(s)	Blank(s)	Blank(s)	Blank(s)	Blank(s)	Complete dates are available and there are more than 0 days of survival	Liver	1324	776	784	1328	817	1346	1230	761	6	1977	Blank(s)	Blank(s)	Blank(s)	Dead
60-64 years	Black	Male	Positive histology	Unknown	Liver	8170	Blank(s)	Blank(s)	Blank(s)	Blank(s)	Blank(s)	Blank(s)	Recommended but not performed, unknown reason	Blank(s)	Blank(s)	Blank(s)	9	Blank(s)	Blank(s)	Blank(s)	Blank(s)	Blank(s)	Blank(s)	Blank(s)	Blank(s)	Blank(s)	Complete dates are available and there are more than 0 days of survival	Liver	1250	851	883	1288	861	1250	1179	819	0	1975	Blank(s)	Blank(s)	Blank(s)	Dead
50-54 years	White	Male	Positive histology	Unknown	Liver	8170	Blank(s)	Blank(s)	Blank(s)	Blank(s)	Blank(s)	Blank(s)	Recommended but not performed, unknown reason	Blank(s)	Blank(s)	Blank(s)	9	Blank(s)	Blank(s)	Blank(s)	Blank(s)	Blank(s)	Blank(s)	Blank(s)	Blank(s)	Blank(s)	Complete dates are available and there are more than 0 days of survival	Liver	1324	776	784	1328	817	1346	1230	761	6	1979	Blank(s)	Blank(s)	Blank(s)	Dead
70-74 years	White	Male	Positive histology	Unknown	Liver	8170	Blank(s)	Blank(s)	Blank(s)	Blank(s)	Blank(s)	Blank(s)	Recommended but not performed, unknown reason	Blank(s)	Blank(s)	Blank(s)	9	Blank(s)	Blank(s)	Blank(s)	Blank(s)	Blank(s)	Blank(s)	Blank(s)	Blank(s)	Blank(s)	Complete dates are available and there are more than 0 days of survival	Liver	797	484	467	759	477	760	695	453	0	1978	Blank(s)	Blank(s)	Blank(s)	Dead
75-79 years	White	Male	Positive histology	Unknown	Liver	8170	Blank(s)	Blank(s)	Blank(s)	Blank(s)	Blank(s)	Blank(s)	Recommended but not performed, unknown reason	Blank(s)	Blank(s)	Blank(s)	9	Blank(s)	Blank(s)	Blank(s)	Blank(s)	Blank(s)	Blank(s)	Blank(s)	Blank(s)	Blank(s)	Complete dates are available and there are more than 0 days of survival	Diseases of Heart	1324	776	784	1328	817	1346	1230	761	78	1980	Blank(s)	Blank(s)	Blank(s)	Dead
80-84 years	White	Female	Positive histology	Unknown	Liver	8170	Blank(s)	Blank(s)	88	0	Blank(s)	Blank(s)	Not recommended	0	0	0	Blank(s)	Blank(s)	0	Blank(s)	Blank(s)	Blank(s)	Blank(s)	Blank(s)	Blank(s)	Blank(s)	Complete dates are available and there are more than 0 days of survival	Diseases of Heart	797	484	467	759	477	760	695	453	0	2000	Blank(s)	Blank(s)	Blank(s)	Dead
55-59 years	White	Female	Positive histology	Unknown	Liver	8170	Blank(s)	Blank(s)	Blank(s)	Blank(s)	Blank(s)	Blank(s)	Recommended but not performed, unknown reason	Blank(s)	Blank(s)	Blank(s)	9	Blank(s)	Blank(s)	Blank(s)	Blank(s)	Blank(s)	Blank(s)	Blank(s)	Blank(s)	Blank(s)	Complete dates are available and there are more than 0 days of survival	Liver	1324	776	784	1328	817	1346	1230	761	5	1976	Blank(s)	Blank(s)	Blank(s)	Dead
75-79 years	White	Female	Positive histology	Unknown	Liver	8170	Blank(s)	Blank(s)	Blank(s)	Blank(s)	Blank(s)	Blank(s)	Recommended but not performed, unknown reason	Blank(s)	Blank(s)	Blank(s)	9	Blank(s)	Blank(s)	Blank(s)	Blank(s)	Blank(s)	Blank(s)	Blank(s)	Blank(s)	Blank(s)	Complete dates are available and there are more than 0 days of survival	Liver	797	484	467	759	477	760	695	453	3	1981	Blank(s)	Blank(s)	Blank(s)	Dead
50-54 years	Other (American Indian/AK Native, Asian/Pacific Islander)	Female	Positive histology	Unknown	Liver	8170	Blank(s)	Blank(s)	Blank(s)	Blank(s)	Blank(s)	Blank(s)	Recommended but not performed, unknown reason	Blank(s)	Blank(s)	Blank(s)	9	Blank(s)	Blank(s)	Blank(s)	Blank(s)	Blank(s)	Blank(s)	Blank(s)	Blank(s)	Blank(s)	Complete dates are available and there are more than 0 days of survival	Liver	1324	776	784	1328	817	1346	1230	761	4	1976	Blank(s)	Blank(s)	Blank(s)	Dead
80-84 years	White	Female	Positive laboratory test/marker study	Unknown	Liver	8170	Blank(s)	Blank(s)	88	Blank(s)	Blank(s)	Blank(s)	Not recommended	Blank(s)	Blank(s)	Blank(s)	2	Blank(s)	0	Blank(s)	Blank(s)	Blank(s)	Blank(s)	Blank(s)	Blank(s)	Blank(s)	Complete dates are available and there are more than 0 days of survival	Liver	833	495	534	878	444	774	723	419	6	1989	Blank(s)	Blank(s)	Blank(s)	Dead
75-79 years	White	Female	Positive histology	Unknown	Liver	8170	Blank(s)	Blank(s)	88	Blank(s)	Blank(s)	Blank(s)	Not recommended	Blank(s)	Blank(s)	Blank(s)	0	Blank(s)	0	Blank(s)	Blank(s)	Blank(s)	Blank(s)	Blank(s)	Blank(s)	Blank(s)	Complete dates are available and there are more than 0 days of survival	Liver	1324	776	784	1328	817	1346	1230	761	1	1992	Blank(s)	Blank(s)	Blank(s)	Dead
85+ years	Other (American Indian/AK Native, Asian/Pacific Islander)	Female	Positive histology	Well differentiated; Grade I	Liver	8170	IIIA	IIIA	Blank(s)	0	None	None; diagnosed at autopsy	Not recommended	Blank(s)	Blank(s)	Blank(s)	Blank(s)	Blank(s)	0	82	390	0	0	0	10	0	Complete dates are available and there are more than 0 days of survival	Liver	1324	776	784	1328	817	1346	1230	761	2	2011	T3a	N0	M0	Dead
70-74 years	White	Male	Positive histology	Moderately differentiated; Grade II	Liver	8140	Blank(s)	Blank(s)	Blank(s)	Blank(s)	Blank(s)	Blank(s)	Recommended but not performed, unknown reason	Blank(s)	Blank(s)	Blank(s)	9	Blank(s)	Blank(s)	Blank(s)	Blank(s)	Blank(s)	Blank(s)	Blank(s)	Blank(s)	Blank(s)	Complete dates are available and there are more than 0 days of survival	Liver	1250	851	883	1288	861	1250	1179	819	2	1983	Blank(s)	Blank(s)	Blank(s)	Dead
60-64 years	White	Female	Positive histology	Unknown	Liver	8170	Blank(s)	Blank(s)	Blank(s)	Blank(s)	Blank(s)	Blank(s)	Recommended but not performed, unknown reason	Blank(s)	Blank(s)	Blank(s)	9	Blank(s)	Blank(s)	Blank(s)	Blank(s)	Blank(s)	Blank(s)	Blank(s)	Blank(s)	Blank(s)	Complete dates are available and there are more than 0 days of survival	Miscellaneous Malignant Cancer	1085	781	766	1065	760	1053	988	715	0	1980	Blank(s)	Blank(s)	Blank(s)	Dead
65-69 years	White	Female	Positive histology	Unknown	Liver	8140	Blank(s)	Blank(s)	Blank(s)	Blank(s)	Blank(s)	Blank(s)	Recommended but not performed, unknown reason	Blank(s)	Blank(s)	Blank(s)	9	Blank(s)	Blank(s)	Blank(s)	Blank(s)	Blank(s)	Blank(s)	Blank(s)	Blank(s)	Blank(s)	Complete dates are available and there are more than 0 days of survival	Other Biliary	1250	851	883	1288	861	1250	1179	819	1	1978	Blank(s)	Blank(s)	Blank(s)	Dead
55-59 years	White	Male	Positive histology	Unknown	Liver	8170	Blank(s)	Blank(s)	Blank(s)	Blank(s)	Blank(s)	Blank(s)	Recommended but not performed, unknown reason	Blank(s)	Blank(s)	Blank(s)	9	Blank(s)	Blank(s)	Blank(s)	Blank(s)	Blank(s)	Blank(s)	Blank(s)	Blank(s)	Blank(s)	Complete dates are available and there are more than 0 days of survival	Chronic Liver Disease and Cirrhosis	1085	781	766	1065	760	1053	988	715	0	1977	Blank(s)	Blank(s)	Blank(s)	Dead
75-79 years	White	Male	Unknown	Unknown	Liver	8010	Blank(s)	Blank(s)	Blank(s)	Blank(s)	Blank(s)	Blank(s)	Unknown; death certificate; or autopsy only (2003+)	Blank(s)	Blank(s)	Blank(s)	9	Blank(s)	Blank(s)	Blank(s)	Blank(s)	Blank(s)	Blank(s)	Blank(s)	Blank(s)	Blank(s)	Not calculated because a Death Certificate Only or Autopsy Only case	Liver	1324	776	784	1328	817	1346	1230	761	Unknown	1977	Blank(s)	Blank(s)	Blank(s)	Dead
75-79 years	White	Female	Positive histology	Unknown	Liver	8170	Blank(s)	Blank(s)	Blank(s)	Blank(s)	Blank(s)	Blank(s)	Recommended but not performed, unknown reason	Blank(s)	Blank(s)	Blank(s)	9	Blank(s)	Blank(s)	Blank(s)	Blank(s)	Blank(s)	Blank(s)	Blank(s)	Blank(s)	Blank(s)	Complete dates are available and there are more than 0 days of survival	Liver	1250	851	883	1288	861	1250	1179	819	1	1978	Blank(s)	Blank(s)	Blank(s)	Dead
65-69 years	Black	Male	Positive exfoliative cytology, no positive histology	Poorly differentiated; Grade III	Liver	8170	Blank(s)	Blank(s)	88	Blank(s)	Blank(s)	Blank(s)	Not recommended	Blank(s)	Blank(s)	Blank(s)	0	Blank(s)	0	Blank(s)	Blank(s)	Blank(s)	Blank(s)	Blank(s)	Blank(s)	Blank(s)	Complete dates are available and there are more than 0 days of survival	Liver	1250	851	883	1288	861	1250	1179	819	35	1989	Blank(s)	Blank(s)	Blank(s)	Dead
60-64 years	White	Male	Positive histology	Unknown	Liver	8170	Blank(s)	Blank(s)	Blank(s)	Blank(s)	Blank(s)	Blank(s)	Recommended but not performed, unknown reason	Blank(s)	Blank(s)	Blank(s)	9	Blank(s)	Blank(s)	Blank(s)	Blank(s)	Blank(s)	Blank(s)	Blank(s)	Blank(s)	Blank(s)	Complete dates are available and there are more than 0 days of survival	Lung and Bronchus	1324	776	784	1328	817	1346	1230	761	0	1977	Blank(s)	Blank(s)	Blank(s)	Dead
60-64 years	White	Male	Positive histology	Unknown	Liver	8170	Blank(s)	Blank(s)	Blank(s)	Blank(s)	Blank(s)	Blank(s)	Recommended but not performed, unknown reason	Blank(s)	Blank(s)	Blank(s)	9	Blank(s)	Blank(s)	Blank(s)	Blank(s)	Blank(s)	Blank(s)	Blank(s)	Blank(s)	Blank(s)	Complete dates are available and there are more than 0 days of survival	Liver	1324	776	784	1328	817	1346	1230	761	27	1976	Blank(s)	Blank(s)	Blank(s)	Dead
65-69 years	White	Male	Positive histology	Unknown	Liver	8170	Blank(s)	Blank(s)	Blank(s)	Blank(s)	Blank(s)	Blank(s)	Not recommended, contraindicated due to other cond; autopsy only (1973-2002)	Blank(s)	Blank(s)	Blank(s)	0	Blank(s)	Blank(s)	Blank(s)	Blank(s)	Blank(s)	Blank(s)	Blank(s)	Blank(s)	Blank(s)	Not calculated because a Death Certificate Only or Autopsy Only case	Chronic Liver Disease and Cirrhosis	1250	851	883	1288	861	1250	1179	819	Unknown	1979	Blank(s)	Blank(s)	Blank(s)	Dead
80-84 years	White	Female	Positive histology	Unknown	Liver	8481	Blank(s)	Blank(s)	Blank(s)	Blank(s)	Blank(s)	Blank(s)	Recommended but not performed, unknown reason	Blank(s)	Blank(s)	Blank(s)	9	Blank(s)	Blank(s)	Blank(s)	Blank(s)	Blank(s)	Blank(s)	Blank(s)	Blank(s)	Blank(s)	Complete dates are available and there are more than 0 days of survival	Pancreas	797	484	467	759	477	760	695	453	0	1980	Blank(s)	Blank(s)	Blank(s)	Dead
75-79 years	White	Female	Positive histology	Unknown	Liver	8170	Blank(s)	Blank(s)	Blank(s)	Blank(s)	Blank(s)	Blank(s)	Recommended but not performed, unknown reason	Blank(s)	Blank(s)	Blank(s)	9	Blank(s)	Blank(s)	Blank(s)	Blank(s)	Blank(s)	Blank(s)	Blank(s)	Blank(s)	Blank(s)	Complete dates are available and there are more than 0 days of survival	State DC not available or state DC available but no COD	1324	776	784	1328	817	1346	1230	761	0	1980	Blank(s)	Blank(s)	Blank(s)	Dead
80-84 years	White	Female	Positive histology	Poorly differentiated; Grade III	Liver	8170	UNK Stage	UNK Stage	Blank(s)	0	None	None; diagnosed at autopsy	Not recommended	Blank(s)	Blank(s)	Blank(s)	Blank(s)	Blank(s)	0	79	999	0	99	9	20	999	Complete dates are available and there are more than 0 days of survival	Liver	1250	851	883	1288	861	1250	1179	819	0	2012	TX	N0	M0	Dead
70-74 years	White	Male	Positive histology	Well differentiated; Grade I	Liver	8170	Blank(s)	Blank(s)	Blank(s)	Blank(s)	Blank(s)	Blank(s)	Recommended but not performed, unknown reason	Blank(s)	Blank(s)	Blank(s)	9	Blank(s)	Blank(s)	Blank(s)	Blank(s)	Blank(s)	Blank(s)	Blank(s)	Blank(s)	Blank(s)	Complete dates are available and there are more than 0 days of survival	Liver	1250	851	883	1288	861	1250	1179	819	39	1979	Blank(s)	Blank(s)	Blank(s)	Dead
70-74 years	Other (American Indian/AK Native, Asian/Pacific Islander)	Male	Positive histology	Undifferentiated; anaplastic; Grade IV	Liver	8170	Blank(s)	Blank(s)	Blank(s)	Blank(s)	Blank(s)	Blank(s)	Recommended but not performed, unknown reason	Blank(s)	Blank(s)	Blank(s)	9	Blank(s)	Blank(s)	Blank(s)	Blank(s)	Blank(s)	Blank(s)	Blank(s)	Blank(s)	Blank(s)	Complete dates are available and there are more than 0 days of survival	Liver	1324	776	784	1328	817	1346	1230	761	0	1977	Blank(s)	Blank(s)	Blank(s)	Dead
70-74 years	Other (American Indian/AK Native, Asian/Pacific Islander)	Male	Positive histology	Unknown	Liver	8170	Blank(s)	Blank(s)	Blank(s)	Blank(s)	Blank(s)	Blank(s)	Recommended but not performed, unknown reason	Blank(s)	Blank(s)	Blank(s)	9	Blank(s)	Blank(s)	Blank(s)	Blank(s)	Blank(s)	Blank(s)	Blank(s)	Blank(s)	Blank(s)	Complete dates are available and there are more than 0 days of survival	Liver	797	484	467	759	477	760	695	453	11	1977	Blank(s)	Blank(s)	Blank(s)	Dead
35-39 years	Other (American Indian/AK Native, Asian/Pacific Islander)	Male	Positive histology	Moderately differentiated; Grade II	Liver	8170	Blank(s)	Blank(s)	Blank(s)	Blank(s)	Blank(s)	Blank(s)	Surgery performed	Blank(s)	Blank(s)	Blank(s)	90	Blank(s)	Blank(s)	Blank(s)	Blank(s)	Blank(s)	Blank(s)	Blank(s)	Blank(s)	Blank(s)	Complete dates are available and there are more than 0 days of survival	Liver	1324	776	784	1328	817	1346	1230	761	14	1979	Blank(s)	Blank(s)	Blank(s)	Dead
60-64 years	Black	Male	Positive histology	Unknown	Liver	8170	Blank(s)	Blank(s)	Blank(s)	Blank(s)	Blank(s)	Blank(s)	Recommended but not performed, unknown reason	Blank(s)	Blank(s)	Blank(s)	9	Blank(s)	Blank(s)	Blank(s)	Blank(s)	Blank(s)	Blank(s)	Blank(s)	Blank(s)	Blank(s)	Complete dates are available and there are more than 0 days of survival	Liver	1250	851	883	1288	861	1250	1179	819	1	1978	Blank(s)	Blank(s)	Blank(s)	Dead
60-64 years	White	Male	Positive histology	Unknown	Liver	8170	Blank(s)	Blank(s)	Blank(s)	Blank(s)	Blank(s)	Blank(s)	Recommended but not performed, unknown reason	Blank(s)	Blank(s)	Blank(s)	9	Blank(s)	Blank(s)	Blank(s)	Blank(s)	Blank(s)	Blank(s)	Blank(s)	Blank(s)	Blank(s)	Complete dates are available and there are 0 days of survival	Other Cause of Death	1250	851	883	1288	861	1250	1179	819	0	1979	Blank(s)	Blank(s)	Blank(s)	Dead
75-79 years	White	Female	Positive histology	Unknown	Liver	8170	Blank(s)	Blank(s)	Blank(s)	Blank(s)	Blank(s)	Blank(s)	Recommended but not performed, unknown reason	Blank(s)	Blank(s)	Blank(s)	9	Blank(s)	Blank(s)	Blank(s)	Blank(s)	Blank(s)	Blank(s)	Blank(s)	Blank(s)	Blank(s)	Complete dates are available and there are more than 0 days of survival	Liver	1324	776	784	1328	817	1346	1230	761	1	1980	Blank(s)	Blank(s)	Blank(s)	Dead
65-69 years	Black	Male	Positive histology	Well differentiated; Grade I	Liver	8170	Blank(s)	Blank(s)	Blank(s)	Blank(s)	Blank(s)	Blank(s)	Recommended but not performed, unknown reason	Blank(s)	Blank(s)	Blank(s)	9	Blank(s)	Blank(s)	Blank(s)	Blank(s)	Blank(s)	Blank(s)	Blank(s)	Blank(s)	Blank(s)	Complete dates are available and there are more than 0 days of survival	Liver	1250	851	883	1288	861	1250	1179	819	1	1979	Blank(s)	Blank(s)	Blank(s)	Dead
65-69 years	Black	Male	Positive histology	Poorly differentiated; Grade III	Liver	8170	Blank(s)	Blank(s)	Blank(s)	Blank(s)	Blank(s)	Blank(s)	Recommended but not performed, unknown reason	Blank(s)	Blank(s)	Blank(s)	9	Blank(s)	Blank(s)	Blank(s)	Blank(s)	Blank(s)	Blank(s)	Blank(s)	Blank(s)	Blank(s)	Complete dates are available and there are more than 0 days of survival	Liver	1324	776	784	1328	817	1346	1230	761	0	1977	Blank(s)	Blank(s)	Blank(s)	Dead
65-69 years	White	Male	Positive histology	Unknown	Liver	8170	Blank(s)	Blank(s)	Blank(s)	Blank(s)	Blank(s)	Blank(s)	Recommended but not performed, unknown reason	Blank(s)	Blank(s)	Blank(s)	9	Blank(s)	Blank(s)	Blank(s)	Blank(s)	Blank(s)	Blank(s)	Blank(s)	Blank(s)	Blank(s)	Complete dates are available and there are more than 0 days of survival	Liver	1324	776	784	1328	817	1346	1230	761	5	1977	Blank(s)	Blank(s)	Blank(s)	Dead
55-59 years	White	Male	Positive histology	Unknown	Liver	8170	Blank(s)	Blank(s)	Blank(s)	Blank(s)	Blank(s)	Blank(s)	Recommended but not performed, unknown reason	Blank(s)	Blank(s)	Blank(s)	9	Blank(s)	Blank(s)	Blank(s)	Blank(s)	Blank(s)	Blank(s)	Blank(s)	Blank(s)	Blank(s)	Complete dates are available and there are more than 0 days of survival	Liver	1085	781	766	1065	760	1053	988	715	5	1979	Blank(s)	Blank(s)	Blank(s)	Dead
70-74 years	White	Male	Positive histology	Moderately differentiated; Grade II	Liver	8170	Blank(s)	Blank(s)	88	Blank(s)	Blank(s)	Blank(s)	Surgery performed	Blank(s)	Blank(s)	Blank(s)	40	Blank(s)	0	Blank(s)	Blank(s)	Blank(s)	Blank(s)	Blank(s)	Blank(s)	Blank(s)	Complete dates are available and there are more than 0 days of survival	Liver	1250	851	883	1288	861	1250	1179	819	12	1996	Blank(s)	Blank(s)	Blank(s)	Dead
85+ years	White	Male	Positive exfoliative cytology, no positive histology	Well differentiated; Grade I	Liver	8170	Blank(s)	Blank(s)	Blank(s)	Blank(s)	Blank(s)	Blank(s)	Recommended but not performed, unknown reason	Blank(s)	Blank(s)	Blank(s)	9	Blank(s)	Blank(s)	Blank(s)	Blank(s)	Blank(s)	Blank(s)	Blank(s)	Blank(s)	Blank(s)	Complete dates are available and there are more than 0 days of survival	Liver	1324	776	784	1328	817	1346	1230	761	8	1982	Blank(s)	Blank(s)	Blank(s)	Dead
80-84 years	White	Male	Positive histology	Unknown	Liver	8970	Blank(s)	Blank(s)	Blank(s)	Blank(s)	Blank(s)	Blank(s)	Not recommended, contraindicated due to other cond; autopsy only (1973-2002)	Blank(s)	Blank(s)	Blank(s)	0	Blank(s)	Blank(s)	Blank(s)	Blank(s)	Blank(s)	Blank(s)	Blank(s)	Blank(s)	Blank(s)	Not calculated because a Death Certificate Only or Autopsy Only case	State DC not available or state DC available but no COD	1250	851	883	1288	861	1250	1179	819	Unknown	1979	Blank(s)	Blank(s)	Blank(s)	Dead
60-64 years	Black	Male	Positive histology	Unknown	Liver	8170	Blank(s)	Blank(s)	Blank(s)	Blank(s)	Blank(s)	Blank(s)	Recommended but not performed, unknown reason	Blank(s)	Blank(s)	Blank(s)	9	Blank(s)	Blank(s)	Blank(s)	Blank(s)	Blank(s)	Blank(s)	Blank(s)	Blank(s)	Blank(s)	Complete dates are available and there are more than 0 days of survival	Liver	1324	776	784	1328	817	1346	1230	761	0	1979	Blank(s)	Blank(s)	Blank(s)	Dead
50-54 years	White	Male	Positive histology	Unknown	Liver	8170	Blank(s)	Blank(s)	Blank(s)	Blank(s)	Blank(s)	Blank(s)	Recommended but not performed, unknown reason	Blank(s)	Blank(s)	Blank(s)	9	Blank(s)	Blank(s)	Blank(s)	Blank(s)	Blank(s)	Blank(s)	Blank(s)	Blank(s)	Blank(s)	Complete dates are available and there are more than 0 days of survival	Liver	1324	776	784	1328	817	1346	1230	761	0	1978	Blank(s)	Blank(s)	Blank(s)	Dead
75-79 years	White	Male	Clinical diagnosis only	Unknown	Liver	8170	Blank(s)	Blank(s)	Blank(s)	Blank(s)	Blank(s)	Blank(s)	Recommended but not performed, unknown reason	Blank(s)	Blank(s)	Blank(s)	9	Blank(s)	Blank(s)	Blank(s)	Blank(s)	Blank(s)	Blank(s)	Blank(s)	Blank(s)	Blank(s)	Complete dates are available and there are more than 0 days of survival	Liver	1085	781	766	1065	760	1053	988	715	1	1976	Blank(s)	Blank(s)	Blank(s)	Dead
60-64 years	White	Male	Positive histology	Unknown	Liver	8170	Blank(s)	Blank(s)	Blank(s)	Blank(s)	Blank(s)	Blank(s)	Recommended but not performed, unknown reason	Blank(s)	Blank(s)	Blank(s)	9	Blank(s)	Blank(s)	Blank(s)	Blank(s)	Blank(s)	Blank(s)	Blank(s)	Blank(s)	Blank(s)	Complete dates are available and there are 0 days of survival	Liver	797	484	467	759	477	760	695	453	0	1976	Blank(s)	Blank(s)	Blank(s)	Dead
30-34 years	Other (American Indian/AK Native, Asian/Pacific Islander)	Female	Positive histology	Unknown	Liver	8170	Blank(s)	Blank(s)	Blank(s)	Blank(s)	Blank(s)	Blank(s)	Surgery performed	Blank(s)	Blank(s)	Blank(s)	90	Blank(s)	Blank(s)	Blank(s)	Blank(s)	Blank(s)	Blank(s)	Blank(s)	Blank(s)	Blank(s)	Complete dates are available and there are more than 0 days of survival	Liver	797	484	467	759	477	760	695	453	4	1976	Blank(s)	Blank(s)	Blank(s)	Dead
65-69 years	Black	Male	Positive histology	Unknown	Liver	8170	Blank(s)	Blank(s)	Blank(s)	Blank(s)	Blank(s)	Blank(s)	Recommended but not performed, unknown reason	Blank(s)	Blank(s)	Blank(s)	9	Blank(s)	Blank(s)	Blank(s)	Blank(s)	Blank(s)	Blank(s)	Blank(s)	Blank(s)	Blank(s)	Complete dates are available and there are more than 0 days of survival	Liver	1324	776	784	1328	817	1346	1230	761	0	1979	Blank(s)	Blank(s)	Blank(s)	Dead
75-79 years	White	Male	Positive histology	Well differentiated; Grade I	Liver	8170	Blank(s)	Blank(s)	88	0	Blank(s)	Blank(s)	Not recommended	0	0	0	Blank(s)	Blank(s)	0	Blank(s)	Blank(s)	Blank(s)	Blank(s)	Blank(s)	Blank(s)	Blank(s)	Complete dates are available and there are more than 0 days of survival	Liver	1085	781	766	1065	760	1053	988	715	12	2002	Blank(s)	Blank(s)	Blank(s)	Dead
75-79 years	Other (American Indian/AK Native, Asian/Pacific Islander)	Female	Positive histology	Unknown	Liver	8170	Blank(s)	Blank(s)	Blank(s)	Blank(s)	Blank(s)	Blank(s)	Recommended but not performed, unknown reason	Blank(s)	Blank(s)	Blank(s)	9	Blank(s)	Blank(s)	Blank(s)	Blank(s)	Blank(s)	Blank(s)	Blank(s)	Blank(s)	Blank(s)	Complete dates are available and there are more than 0 days of survival	Nephritis, Nephrotic Syndrome and Nephrosis	1324	776	784	1328	817	1346	1230	761	0	1976	Blank(s)	Blank(s)	Blank(s)	Dead
45-49 years	White	Male	Positive histology	Unknown	Liver	8170	Blank(s)	Blank(s)	Blank(s)	Blank(s)	Blank(s)	Blank(s)	Recommended but not performed, unknown reason	Blank(s)	Blank(s)	Blank(s)	9	Blank(s)	Blank(s)	Blank(s)	Blank(s)	Blank(s)	Blank(s)	Blank(s)	Blank(s)	Blank(s)	Complete dates are available and there are more than 0 days of survival	Liver	1324	776	784	1328	817	1346	1230	761	2	1976	Blank(s)	Blank(s)	Blank(s)	Dead
75-79 years	White	Male	Positive histology	Moderately differentiated; Grade II	Liver	8170	Blank(s)	Blank(s)	Blank(s)	Blank(s)	Blank(s)	Blank(s)	Surgery performed	Blank(s)	Blank(s)	Blank(s)	90	Blank(s)	Blank(s)	Blank(s)	Blank(s)	Blank(s)	Blank(s)	Blank(s)	Blank(s)	Blank(s)	Complete dates are available and there are more than 0 days of survival	Liver	1250	851	883	1288	861	1250	1179	819	0	1978	Blank(s)	Blank(s)	Blank(s)	Dead
75-79 years	Other (American Indian/AK Native, Asian/Pacific Islander)	Male	Positive histology	Unknown	Liver	8170	Blank(s)	Blank(s)	Blank(s)	Blank(s)	Blank(s)	Blank(s)	Not recommended, contraindicated due to other cond; autopsy only (1973-2002)	Blank(s)	Blank(s)	Blank(s)	0	Blank(s)	Blank(s)	Blank(s)	Blank(s)	Blank(s)	Blank(s)	Blank(s)	Blank(s)	Blank(s)	Not calculated because a Death Certificate Only or Autopsy Only case	Other Cause of Death	1324	776	784	1328	817	1346	1230	761	Unknown	1976	Blank(s)	Blank(s)	Blank(s)	Dead
55-59 years	White	Male	Positive histology	Unknown	Liver	8170	Blank(s)	Blank(s)	Blank(s)	Blank(s)	Blank(s)	Blank(s)	Not recommended, contraindicated due to other cond; autopsy only (1973-2002)	Blank(s)	Blank(s)	Blank(s)	0	Blank(s)	Blank(s)	Blank(s)	Blank(s)	Blank(s)	Blank(s)	Blank(s)	Blank(s)	Blank(s)	Not calculated because a Death Certificate Only or Autopsy Only case	Liver	833	495	534	878	444	774	723	419	Unknown	1979	Blank(s)	Blank(s)	Blank(s)	Dead
85+ years	White	Female	Direct visualization without microscopic confirmation	Unknown	Liver	8170	Blank(s)	Blank(s)	Blank(s)	Blank(s)	Blank(s)	Blank(s)	Recommended but not performed, unknown reason	Blank(s)	Blank(s)	Blank(s)	9	Blank(s)	Blank(s)	Blank(s)	Blank(s)	Blank(s)	Blank(s)	Blank(s)	Blank(s)	Blank(s)	Complete dates are available and there are more than 0 days of survival	Diseases of Heart	797	484	467	759	477	760	695	453	1	1976	Blank(s)	Blank(s)	Blank(s)	Dead
60-64 years	White	Female	Positive histology	Moderately differentiated; Grade II	Liver	8170	Blank(s)	Blank(s)	Blank(s)	Blank(s)	Blank(s)	Blank(s)	Surgery performed	Blank(s)	Blank(s)	Blank(s)	90	Blank(s)	Blank(s)	Blank(s)	Blank(s)	Blank(s)	Blank(s)	Blank(s)	Blank(s)	Blank(s)	Complete dates are available and there are more than 0 days of survival	Lung and Bronchus	833	495	534	878	444	774	723	419	137	1975	Blank(s)	Blank(s)	Blank(s)	Dead
65-69 years	White	Male	Positive histology	Unknown	Liver	8170	Blank(s)	Blank(s)	Blank(s)	Blank(s)	Blank(s)	Blank(s)	Recommended but not performed, unknown reason	Blank(s)	Blank(s)	Blank(s)	9	Blank(s)	Blank(s)	Blank(s)	Blank(s)	Blank(s)	Blank(s)	Blank(s)	Blank(s)	Blank(s)	Complete dates are available and there are more than 0 days of survival	Liver	1085	781	766	1065	760	1053	988	715	0	1979	Blank(s)	Blank(s)	Blank(s)	Dead
45-49 years	Black	Female	Positive histology	Unknown	Liver	8170	Blank(s)	Blank(s)	Blank(s)	Blank(s)	Blank(s)	Blank(s)	Surgery performed	Blank(s)	Blank(s)	Blank(s)	90	Blank(s)	Blank(s)	Blank(s)	Blank(s)	Blank(s)	Blank(s)	Blank(s)	Blank(s)	Blank(s)	Complete dates are available and there are more than 0 days of survival	Liver	1250	851	883	1288	861	1250	1179	819	32	1977	Blank(s)	Blank(s)	Blank(s)	Dead
85+ years	White	Female	Positive histology	Unknown	BileDuctsIntraHepat	8180	Blank(s)	Blank(s)	Blank(s)	Blank(s)	Blank(s)	Blank(s)	Recommended but not performed, unknown reason	Blank(s)	Blank(s)	Blank(s)	9	Blank(s)	Blank(s)	Blank(s)	Blank(s)	Blank(s)	Blank(s)	Blank(s)	Blank(s)	Blank(s)	Complete dates are available and there are more than 0 days of survival	Liver	1324	776	784	1328	817	1346	1230	761	0	1977	Blank(s)	Blank(s)	Blank(s)	Dead
70-74 years	Other (American Indian/AK Native, Asian/Pacific Islander)	Male	Positive histology	Unknown	Liver	8170	Blank(s)	Blank(s)	Blank(s)	Blank(s)	Blank(s)	Blank(s)	Recommended but not performed, unknown reason	Blank(s)	Blank(s)	Blank(s)	9	Blank(s)	Blank(s)	Blank(s)	Blank(s)	Blank(s)	Blank(s)	Blank(s)	Blank(s)	Blank(s)	Complete dates are available and there are more than 0 days of survival	Liver	1324	776	784	1328	817	1346	1230	761	0	1978	Blank(s)	Blank(s)	Blank(s)	Dead
55-59 years	Other (American Indian/AK Native, Asian/Pacific Islander)	Male	Positive histology	Unknown	Liver	8170	Blank(s)	Blank(s)	Blank(s)	Blank(s)	Blank(s)	Blank(s)	Recommended but not performed, unknown reason	Blank(s)	Blank(s)	Blank(s)	9	Blank(s)	Blank(s)	Blank(s)	Blank(s)	Blank(s)	Blank(s)	Blank(s)	Blank(s)	Blank(s)	Incomplete dates are available and there cannot be zero days of follow-up	Liver	1250	851	883	1288	861	1250	1179	819	8	1975	Blank(s)	Blank(s)	Blank(s)	Dead
45-49 years	Other (American Indian/AK Native, Asian/Pacific Islander)	Male	Positive histology	Unknown	Liver	8170	Blank(s)	Blank(s)	Blank(s)	Blank(s)	Blank(s)	Blank(s)	Surgery performed	Blank(s)	Blank(s)	Blank(s)	90	Blank(s)	Blank(s)	Blank(s)	Blank(s)	Blank(s)	Blank(s)	Blank(s)	Blank(s)	Blank(s)	Complete dates are available and there are more than 0 days of survival	Miscellaneous Malignant Cancer	1324	776	784	1328	817	1346	1230	761	13	1977	Blank(s)	Blank(s)	Blank(s)	Dead
75-79 years	Other (American Indian/AK Native, Asian/Pacific Islander)	Male	Positive histology	Well differentiated; Grade I	Liver	8170	Blank(s)	Blank(s)	Blank(s)	Blank(s)	Blank(s)	Blank(s)	Recommended but not performed, unknown reason	Blank(s)	Blank(s)	Blank(s)	9	Blank(s)	Blank(s)	Blank(s)	Blank(s)	Blank(s)	Blank(s)	Blank(s)	Blank(s)	Blank(s)	Incomplete dates are available and there cannot be zero days of follow-up	Liver	1085	781	766	1065	760	1053	988	715	12	1976	Blank(s)	Blank(s)	Blank(s)	Dead
65-69 years	Other (American Indian/AK Native, Asian/Pacific Islander)	Male	Positive exfoliative cytology, no positive histology	Unknown	Liver	8170	Blank(s)	Blank(s)	88	Blank(s)	Blank(s)	Blank(s)	Not recommended	Blank(s)	Blank(s)	Blank(s)	1	Blank(s)	0	Blank(s)	Blank(s)	Blank(s)	Blank(s)	Blank(s)	Blank(s)	Blank(s)	Complete dates are available and there are more than 0 days of survival	Liver	1324	776	784	1328	817	1346	1230	761	4	1991	Blank(s)	Blank(s)	Blank(s)	Dead
70-74 years	White	Male	Positive histology	Unknown	Liver	8170	Blank(s)	Blank(s)	Blank(s)	Blank(s)	Blank(s)	Blank(s)	Recommended but not performed, unknown reason	Blank(s)	Blank(s)	Blank(s)	9	Blank(s)	Blank(s)	Blank(s)	Blank(s)	Blank(s)	Blank(s)	Blank(s)	Blank(s)	Blank(s)	Complete dates are available and there are more than 0 days of survival	Liver	1324	776	784	1328	817	1346	1230	761	0	1979	Blank(s)	Blank(s)	Blank(s)	Dead
65-69 years	Black	Male	Positive histology	Unknown	Liver	8170	Blank(s)	Blank(s)	Blank(s)	Blank(s)	Blank(s)	Blank(s)	Recommended but not performed, unknown reason	Blank(s)	Blank(s)	Blank(s)	9	Blank(s)	Blank(s)	Blank(s)	Blank(s)	Blank(s)	Blank(s)	Blank(s)	Blank(s)	Blank(s)	Complete dates are available and there are more than 0 days of survival	Miscellaneous Malignant Cancer	1250	851	883	1288	861	1250	1179	819	4	1979	Blank(s)	Blank(s)	Blank(s)	Dead
65-69 years	White	Male	Positive histology	Unknown	Liver	8170	Blank(s)	Blank(s)	Blank(s)	Blank(s)	Blank(s)	Blank(s)	Recommended but not performed, unknown reason	Blank(s)	Blank(s)	Blank(s)	9	Blank(s)	Blank(s)	Blank(s)	Blank(s)	Blank(s)	Blank(s)	Blank(s)	Blank(s)	Blank(s)	Complete dates are available and there are more than 0 days of survival	Diseases of Heart	1324	776	784	1328	817	1346	1230	761	0	1977	Blank(s)	Blank(s)	Blank(s)	Dead
60-64 years	White	Male	Positive histology	Unknown	Liver	8170	Blank(s)	Blank(s)	Blank(s)	Blank(s)	Blank(s)	Blank(s)	Recommended but not performed, unknown reason	Blank(s)	Blank(s)	Blank(s)	9	Blank(s)	Blank(s)	Blank(s)	Blank(s)	Blank(s)	Blank(s)	Blank(s)	Blank(s)	Blank(s)	Complete dates are available and there are more than 0 days of survival	Liver	1085	781	766	1065	760	1053	988	715	25	1975	Blank(s)	Blank(s)	Blank(s)	Dead
40-44 years	White	Male	Positive histology	Moderately differentiated; Grade II	Liver	8140	Blank(s)	Blank(s)	Blank(s)	Blank(s)	Blank(s)	Blank(s)	Recommended but not performed, unknown reason	Blank(s)	Blank(s)	Blank(s)	9	Blank(s)	Blank(s)	Blank(s)	Blank(s)	Blank(s)	Blank(s)	Blank(s)	Blank(s)	Blank(s)	Complete dates are available and there are more than 0 days of survival	Liver	1085	781	766	1065	760	1053	988	715	7	1976	Blank(s)	Blank(s)	Blank(s)	Dead
75-79 years	White	Female	Radiography without microscopic confirm	Unknown	Liver	8170	Blank(s)	Blank(s)	88	Blank(s)	Blank(s)	Blank(s)	Not recommended	Blank(s)	Blank(s)	Blank(s)	0	Blank(s)	0	Blank(s)	Blank(s)	Blank(s)	Blank(s)	Blank(s)	Blank(s)	Blank(s)	Complete dates are available and there are more than 0 days of survival	Colon excluding Rectum	1250	851	883	1288	861	1250	1179	819	2	1993	Blank(s)	Blank(s)	Blank(s)	Dead
85+ years	White	Male	Positive histology	Well differentiated; Grade I	Liver	8170	Blank(s)	Blank(s)	Blank(s)	Blank(s)	Blank(s)	Blank(s)	Recommended but not performed, unknown reason	Blank(s)	Blank(s)	Blank(s)	9	Blank(s)	Blank(s)	Blank(s)	Blank(s)	Blank(s)	Blank(s)	Blank(s)	Blank(s)	Blank(s)	Complete dates are available and there are more than 0 days of survival	Liver	1085	781	766	1065	760	1053	988	715	19	1979	Blank(s)	Blank(s)	Blank(s)	Dead
65-69 years	White	Male	Radiography without microscopic confirm	Unknown	Liver	8170	Blank(s)	Blank(s)	Blank(s)	Blank(s)	Blank(s)	Blank(s)	Recommended but not performed, unknown reason	Blank(s)	Blank(s)	Blank(s)	9	Blank(s)	Blank(s)	Blank(s)	Blank(s)	Blank(s)	Blank(s)	Blank(s)	Blank(s)	Blank(s)	Complete dates are available and there are more than 0 days of survival	Diseases of Heart	1085	781	766	1065	760	1053	988	715	1	1979	Blank(s)	Blank(s)	Blank(s)	Dead
65-69 years	Black	Male	Positive histology	Poorly differentiated; Grade III	Liver	8170	Blank(s)	Blank(s)	Blank(s)	Blank(s)	Blank(s)	Blank(s)	Recommended but not performed, unknown reason	Blank(s)	Blank(s)	Blank(s)	9	Blank(s)	Blank(s)	Blank(s)	Blank(s)	Blank(s)	Blank(s)	Blank(s)	Blank(s)	Blank(s)	Complete dates are available and there are more than 0 days of survival	Miscellaneous Malignant Cancer	1324	776	784	1328	817	1346	1230	761	1	1979	Blank(s)	Blank(s)	Blank(s)	Dead
01-04 years	Other (American Indian/AK Native, Asian/Pacific Islander)	Female	Positive histology	Unknown	Liver	8970	Blank(s)	Blank(s)	Blank(s)	Blank(s)	Blank(s)	Blank(s)	Surgery performed	Blank(s)	Blank(s)	Blank(s)	90	Blank(s)	Blank(s)	Blank(s)	Blank(s)	Blank(s)	Blank(s)	Blank(s)	Blank(s)	Blank(s)	Complete dates are available and there are more than 0 days of survival	Liver	797	484	467	759	477	760	695	453	21	1978	Blank(s)	Blank(s)	Blank(s)	Dead
65-69 years	White	Female	Positive histology	Unknown	Liver	8170	Blank(s)	Blank(s)	Blank(s)	Blank(s)	Blank(s)	Blank(s)	Recommended but not performed, unknown reason	Blank(s)	Blank(s)	Blank(s)	9	Blank(s)	Blank(s)	Blank(s)	Blank(s)	Blank(s)	Blank(s)	Blank(s)	Blank(s)	Blank(s)	Complete dates are available and there are more than 0 days of survival	Liver	797	484	467	759	477	760	695	453	1	1980	Blank(s)	Blank(s)	Blank(s)	Dead
75-79 years	White	Female	Positive histology	Unknown	Liver	8170	Blank(s)	Blank(s)	Blank(s)	Blank(s)	Blank(s)	Blank(s)	Recommended but not performed, unknown reason	Blank(s)	Blank(s)	Blank(s)	9	Blank(s)	Blank(s)	Blank(s)	Blank(s)	Blank(s)	Blank(s)	Blank(s)	Blank(s)	Blank(s)	Complete dates are available and there are more than 0 days of survival	Liver	1085	781	766	1065	760	1053	988	715	1	1979	Blank(s)	Blank(s)	Blank(s)	Dead
40-44 years	Other (American Indian/AK Native, Asian/Pacific Islander)	Male	Positive histology	Unknown	Liver	8170	Blank(s)	Blank(s)	Blank(s)	Blank(s)	Blank(s)	Blank(s)	Recommended but not performed, unknown reason	Blank(s)	Blank(s)	Blank(s)	9	Blank(s)	Blank(s)	Blank(s)	Blank(s)	Blank(s)	Blank(s)	Blank(s)	Blank(s)	Blank(s)	Complete dates are available and there are more than 0 days of survival	Liver	833	495	534	878	444	774	723	419	56	1977	Blank(s)	Blank(s)	Blank(s)	Dead
45-49 years	Black	Male	Positive histology	Poorly differentiated; Grade III	Liver	8170	Blank(s)	Blank(s)	Blank(s)	Blank(s)	Blank(s)	Blank(s)	Recommended but not performed, unknown reason	Blank(s)	Blank(s)	Blank(s)	9	Blank(s)	Blank(s)	Blank(s)	Blank(s)	Blank(s)	Blank(s)	Blank(s)	Blank(s)	Blank(s)	Complete dates are available and there are more than 0 days of survival	Miscellaneous Malignant Cancer	1324	776	784	1328	817	1346	1230	761	1	1979	Blank(s)	Blank(s)	Blank(s)	Dead
50-54 years	White	Male	Positive histology	Unknown	Liver	8170	Blank(s)	Blank(s)	Blank(s)	Blank(s)	Blank(s)	Blank(s)	Recommended but not performed, unknown reason	Blank(s)	Blank(s)	Blank(s)	9	Blank(s)	Blank(s)	Blank(s)	Blank(s)	Blank(s)	Blank(s)	Blank(s)	Blank(s)	Blank(s)	Incomplete dates are available and there cannot be zero days of follow-up	State DC not available or state DC available but no COD	797	484	467	759	477	760	695	453	17	1979	Blank(s)	Blank(s)	Blank(s)	Dead
60-64 years	White	Female	Positive histology	Unknown	Liver	8140	Blank(s)	Blank(s)	Blank(s)	Blank(s)	Blank(s)	Blank(s)	Recommended but not performed, unknown reason	Blank(s)	Blank(s)	Blank(s)	9	Blank(s)	Blank(s)	Blank(s)	Blank(s)	Blank(s)	Blank(s)	Blank(s)	Blank(s)	Blank(s)	Complete dates are available and there are more than 0 days of survival	Liver	797	484	467	759	477	760	695	453	3	1979	Blank(s)	Blank(s)	Blank(s)	Dead
70-74 years	White	Male	Positive histology	Poorly differentiated; Grade III	Liver	8170	Blank(s)	Blank(s)	Blank(s)	Blank(s)	Blank(s)	Blank(s)	Recommended but not performed, unknown reason	Blank(s)	Blank(s)	Blank(s)	9	Blank(s)	Blank(s)	Blank(s)	Blank(s)	Blank(s)	Blank(s)	Blank(s)	Blank(s)	Blank(s)	Complete dates are available and there are more than 0 days of survival	Liver	1250	851	883	1288	861	1250	1179	819	2	1980	Blank(s)	Blank(s)	Blank(s)	Dead
70-74 years	White	Male	Positive histology	Unknown	Liver	8170	Blank(s)	Blank(s)	Blank(s)	Blank(s)	Blank(s)	Blank(s)	Recommended but not performed, unknown reason	Blank(s)	Blank(s)	Blank(s)	9	Blank(s)	Blank(s)	Blank(s)	Blank(s)	Blank(s)	Blank(s)	Blank(s)	Blank(s)	Blank(s)	Complete dates are available and there are more than 0 days of survival	Liver	1324	776	784	1328	817	1346	1230	761	0	1976	Blank(s)	Blank(s)	Blank(s)	Dead
70-74 years	White	Male	Positive exfoliative cytology, no positive histology	Unknown	Liver	8170	Blank(s)	Blank(s)	88	Blank(s)	Blank(s)	Blank(s)	Not recommended	Blank(s)	Blank(s)	Blank(s)	0	Blank(s)	0	Blank(s)	Blank(s)	Blank(s)	Blank(s)	Blank(s)	Blank(s)	Blank(s)	Complete dates are available and there are more than 0 days of survival	Liver	1324	776	784	1328	817	1346	1230	761	3	1997	Blank(s)	Blank(s)	Blank(s)	Dead
65-69 years	White	Male	Positive histology	Undifferentiated; anaplastic; Grade IV	Liver	8170	Blank(s)	Blank(s)	Blank(s)	Blank(s)	Blank(s)	Blank(s)	Recommended but not performed, unknown reason	Blank(s)	Blank(s)	Blank(s)	9	Blank(s)	Blank(s)	Blank(s)	Blank(s)	Blank(s)	Blank(s)	Blank(s)	Blank(s)	Blank(s)	Complete dates are available and there are more than 0 days of survival	Liver	1324	776	784	1328	817	1346	1230	761	1	1975	Blank(s)	Blank(s)	Blank(s)	Dead
75-79 years	White	Male	Positive histology	Unknown	Liver	8170	Blank(s)	Blank(s)	Blank(s)	Blank(s)	Blank(s)	Blank(s)	Recommended but not performed, unknown reason	Blank(s)	Blank(s)	Blank(s)	9	Blank(s)	Blank(s)	Blank(s)	Blank(s)	Blank(s)	Blank(s)	Blank(s)	Blank(s)	Blank(s)	Complete dates are available and there are more than 0 days of survival	Liver	1250	851	883	1288	861	1250	1179	819	3	1979	Blank(s)	Blank(s)	Blank(s)	Dead
75-79 years	White	Male	Radiography without microscopic confirm	Unknown	Liver	8170	Blank(s)	Blank(s)	88	Blank(s)	Blank(s)	Blank(s)	Not recommended	Blank(s)	Blank(s)	Blank(s)	0	Blank(s)	0	Blank(s)	Blank(s)	Blank(s)	Blank(s)	Blank(s)	Blank(s)	Blank(s)	Complete dates are available and there are more than 0 days of survival	Liver	1324	776	784	1328	817	1346	1230	761	0	1990	Blank(s)	Blank(s)	Blank(s)	Dead
35-39 years	Other (American Indian/AK Native, Asian/Pacific Islander)	Male	Positive histology	Unknown	Liver	8170	Blank(s)	Blank(s)	Blank(s)	Blank(s)	Blank(s)	Blank(s)	Recommended but not performed, unknown reason	Blank(s)	Blank(s)	Blank(s)	9	Blank(s)	Blank(s)	Blank(s)	Blank(s)	Blank(s)	Blank(s)	Blank(s)	Blank(s)	Blank(s)	Incomplete dates are available and there cannot be zero days of follow-up	Liver	1324	776	784	1328	817	1346	1230	761	1	1976	Blank(s)	Blank(s)	Blank(s)	Dead
40-44 years	Other (American Indian/AK Native, Asian/Pacific Islander)	Male	Positive histology	Unknown	Liver	8170	Blank(s)	Blank(s)	Blank(s)	Blank(s)	Blank(s)	Blank(s)	Recommended but not performed, unknown reason	Blank(s)	Blank(s)	Blank(s)	9	Blank(s)	Blank(s)	Blank(s)	Blank(s)	Blank(s)	Blank(s)	Blank(s)	Blank(s)	Blank(s)	Complete dates are available and there are more than 0 days of survival	Liver	1324	776	784	1328	817	1346	1230	761	5	1975	Blank(s)	Blank(s)	Blank(s)	Dead
50-54 years	Black	Male	Positive histology	Unknown	Liver	8170	Blank(s)	Blank(s)	Blank(s)	Blank(s)	Blank(s)	Blank(s)	Surgery performed	Blank(s)	Blank(s)	Blank(s)	90	Blank(s)	Blank(s)	Blank(s)	Blank(s)	Blank(s)	Blank(s)	Blank(s)	Blank(s)	Blank(s)	Complete dates are available and there are more than 0 days of survival	Liver	1250	851	883	1288	861	1250	1179	819	9	1977	Blank(s)	Blank(s)	Blank(s)	Dead
55-59 years	Other (American Indian/AK Native, Asian/Pacific Islander)	Female	Positive histology	Unknown	Liver	8170	Blank(s)	Blank(s)	Blank(s)	Blank(s)	Blank(s)	Blank(s)	Recommended but not performed, unknown reason	Blank(s)	Blank(s)	Blank(s)	9	Blank(s)	Blank(s)	Blank(s)	Blank(s)	Blank(s)	Blank(s)	Blank(s)	Blank(s)	Blank(s)	Complete dates are available and there are more than 0 days of survival	Liver	1324	776	784	1328	817	1346	1230	761	0	1975	Blank(s)	Blank(s)	Blank(s)	Dead
35-39 years	Other (American Indian/AK Native, Asian/Pacific Islander)	Male	Positive histology	Unknown	Liver	8170	Blank(s)	Blank(s)	Blank(s)	Blank(s)	Blank(s)	Blank(s)	Recommended but not performed, unknown reason	Blank(s)	Blank(s)	Blank(s)	9	Blank(s)	Blank(s)	Blank(s)	Blank(s)	Blank(s)	Blank(s)	Blank(s)	Blank(s)	Blank(s)	Complete dates are available and there are more than 0 days of survival	Liver	1324	776	784	1328	817	1346	1230	761	0	1978	Blank(s)	Blank(s)	Blank(s)	Dead
60-64 years	Other (American Indian/AK Native, Asian/Pacific Islander)	Male	Positive histology	Unknown	Liver	8170	Blank(s)	Blank(s)	Blank(s)	Blank(s)	Blank(s)	Blank(s)	Recommended but not performed, unknown reason	Blank(s)	Blank(s)	Blank(s)	9	Blank(s)	Blank(s)	Blank(s)	Blank(s)	Blank(s)	Blank(s)	Blank(s)	Blank(s)	Blank(s)	Complete dates are available and there are more than 0 days of survival	Liver	1324	776	784	1328	817	1346	1230	761	0	1979	Blank(s)	Blank(s)	Blank(s)	Dead
70-74 years	White	Male	Positive histology	Unknown	Liver	8170	Blank(s)	Blank(s)	Blank(s)	Blank(s)	Blank(s)	Blank(s)	Recommended but not performed, unknown reason	Blank(s)	Blank(s)	Blank(s)	9	Blank(s)	Blank(s)	Blank(s)	Blank(s)	Blank(s)	Blank(s)	Blank(s)	Blank(s)	Blank(s)	Complete dates are available and there are more than 0 days of survival	Liver	1324	776	784	1328	817	1346	1230	761	0	1976	Blank(s)	Blank(s)	Blank(s)	Dead
60-64 years	White	Male	Positive histology	Unknown	Liver	8170	Blank(s)	Blank(s)	Blank(s)	Blank(s)	Blank(s)	Blank(s)	Recommended but not performed, unknown reason	Blank(s)	Blank(s)	Blank(s)	9	Blank(s)	Blank(s)	Blank(s)	Blank(s)	Blank(s)	Blank(s)	Blank(s)	Blank(s)	Blank(s)	Complete dates are available and there are more than 0 days of survival	Miscellaneous Malignant Cancer	797	484	467	759	477	760	695	453	1	1979	Blank(s)	Blank(s)	Blank(s)	Dead
55-59 years	Other (American Indian/AK Native, Asian/Pacific Islander)	Male	Positive histology	Unknown	Liver	8170	Blank(s)	Blank(s)	Blank(s)	Blank(s)	Blank(s)	Blank(s)	Surgery performed	Blank(s)	Blank(s)	Blank(s)	90	Blank(s)	Blank(s)	Blank(s)	Blank(s)	Blank(s)	Blank(s)	Blank(s)	Blank(s)	Blank(s)	Complete dates are available and there are more than 0 days of survival	Liver	1324	776	784	1328	817	1346	1230	761	50	1980	Blank(s)	Blank(s)	Blank(s)	Dead
65-69 years	Other (American Indian/AK Native, Asian/Pacific Islander)	Female	Positive histology	Unknown	Liver	8170	Blank(s)	Blank(s)	88	Blank(s)	Blank(s)	Blank(s)	Surgery performed	Blank(s)	Blank(s)	Blank(s)	35	Blank(s)	0	Blank(s)	Blank(s)	Blank(s)	Blank(s)	Blank(s)	Blank(s)	Blank(s)	Complete dates are available and there are more than 0 days of survival	Liver	1324	776	784	1328	817	1346	1230	761	12	1997	Blank(s)	Blank(s)	Blank(s)	Dead
80-84 years	Other (American Indian/AK Native, Asian/Pacific Islander)	Female	Radiography without microscopic confirm	Unknown	Liver	8170	Blank(s)	UNK Stage	Blank(s)	0	None	None; diagnosed at autopsy	Not recommended	Blank(s)	Blank(s)	Blank(s)	Blank(s)	Blank(s)	0	999	440	0	0	0	999	999	Incomplete dates are available and there cannot be zero days of follow-up	Liver	1324	776	784	1328	817	1346	1230	761	15	2007	Blank(s)	Blank(s)	Blank(s)	Dead
75-79 years	Other (American Indian/AK Native, Asian/Pacific Islander)	Female	Positive histology	Well differentiated; Grade I	Liver	8170	Blank(s)	Blank(s)	88	23	1 to 3 regional lymph nodes removed	None; diagnosed at autopsy	Surgery performed	Blank(s)	Blank(s)	Blank(s)	Blank(s)	Blank(s)	1	Blank(s)	Blank(s)	Blank(s)	Blank(s)	Blank(s)	Blank(s)	Blank(s)	Complete dates are available and there are more than 0 days of survival	Alive	1324	776	784	1328	817	1346	1230	761	152	2003	Blank(s)	Blank(s)	Blank(s)	Alive
85+ years	Black	Female	Positive histology	Unknown	Liver	8170	Blank(s)	Blank(s)	Blank(s)	Blank(s)	Blank(s)	Blank(s)	Recommended but not performed, unknown reason	Blank(s)	Blank(s)	Blank(s)	9	Blank(s)	Blank(s)	Blank(s)	Blank(s)	Blank(s)	Blank(s)	Blank(s)	Blank(s)	Blank(s)	Complete dates are available and there are more than 0 days of survival	Liver	1250	851	883	1288	861	1250	1179	819	11	1981	Blank(s)	Blank(s)	Blank(s)	Dead
70-74 years	White	Female	Positive laboratory test/marker study	Unknown	Liver	8170	UNK Stage	UNK Stage	Blank(s)	0	None	None; diagnosed at autopsy	Not recommended	Blank(s)	Blank(s)	Blank(s)	Blank(s)	Blank(s)	0	65	999	0	0	0	10	999	Complete dates are available and there are more than 0 days of survival	Liver	1250	851	883	1288	861	1250	1179	819	0	2012	TX	N0	M0	Dead
80-84 years	Black	Male	Positive histology	Well differentiated; Grade I	Liver	8140	Blank(s)	Blank(s)	Blank(s)	Blank(s)	Blank(s)	Blank(s)	Recommended but not performed, unknown reason	Blank(s)	Blank(s)	Blank(s)	9	Blank(s)	Blank(s)	Blank(s)	Blank(s)	Blank(s)	Blank(s)	Blank(s)	Blank(s)	Blank(s)	Complete dates are available and there are more than 0 days of survival	Kidney and Renal Pelvis	1250	851	883	1288	861	1250	1179	819	1	1977	Blank(s)	Blank(s)	Blank(s)	Dead
75-79 years	White	Female	Positive histology	Unknown	Liver	8170	Blank(s)	Blank(s)	Blank(s)	Blank(s)	Blank(s)	Blank(s)	Recommended but not performed, unknown reason	Blank(s)	Blank(s)	Blank(s)	9	Blank(s)	Blank(s)	Blank(s)	Blank(s)	Blank(s)	Blank(s)	Blank(s)	Blank(s)	Blank(s)	Complete dates are available and there are more than 0 days of survival	Liver	797	484	467	759	477	760	695	453	5	1977	Blank(s)	Blank(s)	Blank(s)	Dead
75-79 years	Other (American Indian/AK Native, Asian/Pacific Islander)	Male	Positive histology	Unknown	Liver	8170	Blank(s)	Blank(s)	Blank(s)	Blank(s)	Blank(s)	Blank(s)	Recommended but not performed, unknown reason	Blank(s)	Blank(s)	Blank(s)	9	Blank(s)	Blank(s)	Blank(s)	Blank(s)	Blank(s)	Blank(s)	Blank(s)	Blank(s)	Blank(s)	Complete dates are available and there are more than 0 days of survival	Liver	797	484	467	759	477	760	695	453	15	1980	Blank(s)	Blank(s)	Blank(s)	Dead
70-74 years	White	Male	Positive histology	Well differentiated; Grade I	Liver	8170	Blank(s)	Blank(s)	Blank(s)	Blank(s)	Blank(s)	Blank(s)	Recommended but not performed, unknown reason	Blank(s)	Blank(s)	Blank(s)	9	Blank(s)	Blank(s)	Blank(s)	Blank(s)	Blank(s)	Blank(s)	Blank(s)	Blank(s)	Blank(s)	Complete dates are available and there are more than 0 days of survival	In situ, benign or unknown behavior neoplasm	1250	851	883	1288	861	1250	1179	819	2	1976	Blank(s)	Blank(s)	Blank(s)	Dead
55-59 years	White	Female	Positive histology	Unknown	Liver	9120	Blank(s)	Blank(s)	Blank(s)	Blank(s)	Blank(s)	Blank(s)	Recommended but not performed, unknown reason	Blank(s)	Blank(s)	Blank(s)	9	Blank(s)	Blank(s)	Blank(s)	Blank(s)	Blank(s)	Blank(s)	Blank(s)	Blank(s)	Blank(s)	Complete dates are available and there are more than 0 days of survival	Liver	1085	781	766	1065	760	1053	988	715	2	1977	Blank(s)	Blank(s)	Blank(s)	Dead
65-69 years	White	Male	Positive histology	Unknown	Liver	8170	Blank(s)	Blank(s)	Blank(s)	Blank(s)	Blank(s)	Blank(s)	Not recommended, contraindicated due to other cond; autopsy only (1973-2002)	Blank(s)	Blank(s)	Blank(s)	0	Blank(s)	Blank(s)	Blank(s)	Blank(s)	Blank(s)	Blank(s)	Blank(s)	Blank(s)	Blank(s)	Not calculated because a Death Certificate Only or Autopsy Only case	Suicide and Self-Inflicted Injury	1324	776	784	1328	817	1346	1230	761	Unknown	1977	Blank(s)	Blank(s)	Blank(s)	Dead
75-79 years	Other (American Indian/AK Native, Asian/Pacific Islander)	Female	Positive histology	Unknown	Liver	8170	Blank(s)	Blank(s)	88	Blank(s)	Blank(s)	Blank(s)	Not recommended, contraindicated due to other cond; autopsy only (1973-2002)	Blank(s)	Blank(s)	Blank(s)	0	Blank(s)	0	Blank(s)	Blank(s)	Blank(s)	Blank(s)	Blank(s)	Blank(s)	Blank(s)	Not calculated because a Death Certificate Only or Autopsy Only case	Septicemia	1250	851	883	1288	861	1250	1179	819	Unknown	1992	Blank(s)	Blank(s)	Blank(s)	Dead
65-69 years	Black	Male	Positive histology	Unknown	Liver	8170	Blank(s)	Blank(s)	Blank(s)	Blank(s)	Blank(s)	Blank(s)	Recommended but not performed, unknown reason	Blank(s)	Blank(s)	Blank(s)	9	Blank(s)	Blank(s)	Blank(s)	Blank(s)	Blank(s)	Blank(s)	Blank(s)	Blank(s)	Blank(s)	Complete dates are available and there are more than 0 days of survival	Liver	1324	776	784	1328	817	1346	1230	761	1	1979	Blank(s)	Blank(s)	Blank(s)	Dead
65-69 years	Black	Female	Positive laboratory test/marker study	Unknown	Liver	8170	IVB	IV	Blank(s)	0	None	None; diagnosed at autopsy	Not recommended	Blank(s)	Blank(s)	Blank(s)	Blank(s)	Blank(s)	0	170	630	100	51	0	10	1	Complete dates are available and there are more than 0 days of survival	Liver	1324	776	784	1328	817	1346	1230	761	1	2013	T3b	N1	M1	Dead
65-69 years	White	Male	Positive histology	Unknown	Liver	8170	Blank(s)	Blank(s)	Blank(s)	Blank(s)	Blank(s)	Blank(s)	Recommended but not performed, unknown reason	Blank(s)	Blank(s)	Blank(s)	9	Blank(s)	Blank(s)	Blank(s)	Blank(s)	Blank(s)	Blank(s)	Blank(s)	Blank(s)	Blank(s)	Complete dates are available and there are more than 0 days of survival	Liver	833	495	534	878	444	774	723	419	1	1977	Blank(s)	Blank(s)	Blank(s)	Dead
35-39 years	White	Male	Positive histology	Unknown	Liver	8170	Blank(s)	Blank(s)	Blank(s)	Blank(s)	Blank(s)	Blank(s)	Recommended but not performed, unknown reason	Blank(s)	Blank(s)	Blank(s)	9	Blank(s)	Blank(s)	Blank(s)	Blank(s)	Blank(s)	Blank(s)	Blank(s)	Blank(s)	Blank(s)	Incomplete dates are available and there cannot be zero days of follow-up	State DC not available or state DC available but no COD	797	484	467	759	477	760	695	453	6	1976	Blank(s)	Blank(s)	Blank(s)	Dead
50-54 years	Black	Male	Positive histology	Unknown	Liver	8170	Blank(s)	Blank(s)	Blank(s)	Blank(s)	Blank(s)	Blank(s)	Recommended but not performed, unknown reason	Blank(s)	Blank(s)	Blank(s)	9	Blank(s)	Blank(s)	Blank(s)	Blank(s)	Blank(s)	Blank(s)	Blank(s)	Blank(s)	Blank(s)	Complete dates are available and there are more than 0 days of survival	Miscellaneous Malignant Cancer	1085	781	766	1065	760	1053	988	715	0	1978	Blank(s)	Blank(s)	Blank(s)	Dead
65-69 years	White	Male	Positive histology	Poorly differentiated; Grade III	Liver	8140	Blank(s)	Blank(s)	Blank(s)	Blank(s)	Blank(s)	Blank(s)	Recommended but not performed, unknown reason	Blank(s)	Blank(s)	Blank(s)	9	Blank(s)	Blank(s)	Blank(s)	Blank(s)	Blank(s)	Blank(s)	Blank(s)	Blank(s)	Blank(s)	Complete dates are available and there are more than 0 days of survival	Chronic Liver Disease and Cirrhosis	833	495	534	878	444	774	723	419	2	1979	Blank(s)	Blank(s)	Blank(s)	Dead
65-69 years	Other (American Indian/AK Native, Asian/Pacific Islander)	Male	Positive exfoliative cytology, no positive histology	Unknown	Liver	8170	Blank(s)	Blank(s)	Blank(s)	Blank(s)	Blank(s)	Blank(s)	Recommended but not performed, unknown reason	Blank(s)	Blank(s)	Blank(s)	9	Blank(s)	Blank(s)	Blank(s)	Blank(s)	Blank(s)	Blank(s)	Blank(s)	Blank(s)	Blank(s)	Complete dates are available and there are more than 0 days of survival	Liver	1324	776	784	1328	817	1346	1230	761	8	1980	Blank(s)	Blank(s)	Blank(s)	Dead
60-64 years	White	Male	Positive histology	Poorly differentiated; Grade III	Liver	8140	Blank(s)	Blank(s)	Blank(s)	Blank(s)	Blank(s)	Blank(s)	Recommended but not performed, unknown reason	Blank(s)	Blank(s)	Blank(s)	9	Blank(s)	Blank(s)	Blank(s)	Blank(s)	Blank(s)	Blank(s)	Blank(s)	Blank(s)	Blank(s)	Complete dates are available and there are more than 0 days of survival	State DC not available or state DC available but no COD	797	484	467	759	477	760	695	453	1	1977	Blank(s)	Blank(s)	Blank(s)	Dead
65-69 years	White	Male	Radiography without microscopic confirm	Unknown	Liver	8170	Blank(s)	Blank(s)	Blank(s)	Blank(s)	Blank(s)	Blank(s)	Recommended but not performed, unknown reason	Blank(s)	Blank(s)	Blank(s)	9	Blank(s)	Blank(s)	Blank(s)	Blank(s)	Blank(s)	Blank(s)	Blank(s)	Blank(s)	Blank(s)	Complete dates are available and there are more than 0 days of survival	Liver	1324	776	784	1328	817	1346	1230	761	1	1975	Blank(s)	Blank(s)	Blank(s)	Dead
55-59 years	White	Male	Radiography without microscopic confirm	Unknown	Liver	8170	Blank(s)	Blank(s)	Blank(s)	Blank(s)	Blank(s)	Blank(s)	Recommended but not performed, unknown reason	Blank(s)	Blank(s)	Blank(s)	9	Blank(s)	Blank(s)	Blank(s)	Blank(s)	Blank(s)	Blank(s)	Blank(s)	Blank(s)	Blank(s)	Complete dates are available and there are more than 0 days of survival	Chronic Liver Disease and Cirrhosis	1324	776	784	1328	817	1346	1230	761	84	1985	Blank(s)	Blank(s)	Blank(s)	Dead
80-84 years	White	Male	Positive histology	Unknown	BileDuctsIntraHepat	8180	Blank(s)	Blank(s)	Blank(s)	Blank(s)	Blank(s)	Blank(s)	Recommended but not performed, unknown reason	Blank(s)	Blank(s)	Blank(s)	9	Blank(s)	Blank(s)	Blank(s)	Blank(s)	Blank(s)	Blank(s)	Blank(s)	Blank(s)	Blank(s)	Complete dates are available and there are more than 0 days of survival	Liver	1324	776	784	1328	817	1346	1230	761	0	1977	Blank(s)	Blank(s)	Blank(s)	Dead
65-69 years	Black	Female	Positive histology	Unknown	Liver	8170	Blank(s)	Blank(s)	Blank(s)	Blank(s)	Blank(s)	Blank(s)	Recommended but not performed, unknown reason	Blank(s)	Blank(s)	Blank(s)	9	Blank(s)	Blank(s)	Blank(s)	Blank(s)	Blank(s)	Blank(s)	Blank(s)	Blank(s)	Blank(s)	Complete dates are available and there are more than 0 days of survival	Liver	1250	851	883	1288	861	1250	1179	819	18	1978	Blank(s)	Blank(s)	Blank(s)	Dead
50-54 years	Black	Male	Positive histology	Well differentiated; Grade I	Liver	8170	Blank(s)	Blank(s)	Blank(s)	Blank(s)	Blank(s)	Blank(s)	Recommended but not performed, unknown reason	Blank(s)	Blank(s)	Blank(s)	9	Blank(s)	Blank(s)	Blank(s)	Blank(s)	Blank(s)	Blank(s)	Blank(s)	Blank(s)	Blank(s)	Complete dates are available and there are more than 0 days of survival	Liver	1324	776	784	1328	817	1346	1230	761	0	1978	Blank(s)	Blank(s)	Blank(s)	Dead
40-44 years	Other (American Indian/AK Native, Asian/Pacific Islander)	Male	Positive histology	Unknown	Liver	8170	Blank(s)	Blank(s)	Blank(s)	Blank(s)	Blank(s)	Blank(s)	Recommended but not performed, unknown reason	Blank(s)	Blank(s)	Blank(s)	9	Blank(s)	Blank(s)	Blank(s)	Blank(s)	Blank(s)	Blank(s)	Blank(s)	Blank(s)	Blank(s)	Complete dates are available and there are more than 0 days of survival	Miscellaneous Malignant Cancer	1324	776	784	1328	817	1346	1230	761	2	1975	Blank(s)	Blank(s)	Blank(s)	Dead
75-79 years	White	Male	Positive histology	Unknown	Liver	8170	Blank(s)	Blank(s)	Blank(s)	Blank(s)	Blank(s)	Blank(s)	Recommended but not performed, unknown reason	Blank(s)	Blank(s)	Blank(s)	9	Blank(s)	Blank(s)	Blank(s)	Blank(s)	Blank(s)	Blank(s)	Blank(s)	Blank(s)	Blank(s)	Complete dates are available and there are more than 0 days of survival	Liver	1250	851	883	1288	861	1250	1179	819	1	1975	Blank(s)	Blank(s)	Blank(s)	Dead
70-74 years	White	Male	Positive histology	Unknown	Liver	8170	Blank(s)	Blank(s)	Blank(s)	Blank(s)	Blank(s)	Blank(s)	Not recommended, contraindicated due to other cond; autopsy only (1973-2002)	Blank(s)	Blank(s)	Blank(s)	0	Blank(s)	Blank(s)	Blank(s)	Blank(s)	Blank(s)	Blank(s)	Blank(s)	Blank(s)	Blank(s)	Not calculated because a Death Certificate Only or Autopsy Only case	Chronic Liver Disease and Cirrhosis	1250	851	883	1288	861	1250	1179	819	Unknown	1977	Blank(s)	Blank(s)	Blank(s)	Dead
75-79 years	White	Male	Unknown	Unknown	Liver	8010	Blank(s)	Blank(s)	Blank(s)	Blank(s)	Blank(s)	Blank(s)	Unknown; death certificate; or autopsy only (2003+)	Blank(s)	Blank(s)	Blank(s)	9	Blank(s)	Blank(s)	Blank(s)	Blank(s)	Blank(s)	Blank(s)	Blank(s)	Blank(s)	Blank(s)	Not calculated because a Death Certificate Only or Autopsy Only case	Liver	1324	776	784	1328	817	1346	1230	761	Unknown	1975	Blank(s)	Blank(s)	Blank(s)	Dead
65-69 years	Black	Male	Positive histology	Unknown	Liver	8170	Blank(s)	Blank(s)	Blank(s)	Blank(s)	Blank(s)	Blank(s)	Recommended but not performed, unknown reason	Blank(s)	Blank(s)	Blank(s)	9	Blank(s)	Blank(s)	Blank(s)	Blank(s)	Blank(s)	Blank(s)	Blank(s)	Blank(s)	Blank(s)	Complete dates are available and there are more than 0 days of survival	Chronic Liver Disease and Cirrhosis	1250	851	883	1288	861	1250	1179	819	1	1978	Blank(s)	Blank(s)	Blank(s)	Dead
85+ years	White	Male	Positive histology	Poorly differentiated; Grade III	Liver	8170	Blank(s)	Blank(s)	Blank(s)	Blank(s)	Blank(s)	Blank(s)	Recommended but not performed, unknown reason	Blank(s)	Blank(s)	Blank(s)	9	Blank(s)	Blank(s)	Blank(s)	Blank(s)	Blank(s)	Blank(s)	Blank(s)	Blank(s)	Blank(s)	Complete dates are available and there are more than 0 days of survival	Liver	1085	781	766	1065	760	1053	988	715	1	1975	Blank(s)	Blank(s)	Blank(s)	Dead
65-69 years	Other (American Indian/AK Native, Asian/Pacific Islander)	Male	Positive histology	Moderately differentiated; Grade II	Liver	8170	Blank(s)	Blank(s)	Blank(s)	Blank(s)	Blank(s)	Blank(s)	Recommended but not performed, unknown reason	Blank(s)	Blank(s)	Blank(s)	9	Blank(s)	Blank(s)	Blank(s)	Blank(s)	Blank(s)	Blank(s)	Blank(s)	Blank(s)	Blank(s)	Complete dates are available and there are more than 0 days of survival	Esophagus	1324	776	784	1328	817	1346	1230	761	3	1978	Blank(s)	Blank(s)	Blank(s)	Dead
45-49 years	Other (American Indian/AK Native, Asian/Pacific Islander)	Male	Positive histology	Unknown	Liver	8170	Blank(s)	Blank(s)	Blank(s)	Blank(s)	Blank(s)	Blank(s)	Recommended but not performed, unknown reason	Blank(s)	Blank(s)	Blank(s)	9	Blank(s)	Blank(s)	Blank(s)	Blank(s)	Blank(s)	Blank(s)	Blank(s)	Blank(s)	Blank(s)	Incomplete dates are available and there cannot be zero days of follow-up	State DC not available or state DC available but no COD	1324	776	784	1328	817	1346	1230	761	11	1980	Blank(s)	Blank(s)	Blank(s)	Dead
30-34 years	White	Male	Positive histology	Unknown	Liver	8170	Blank(s)	Blank(s)	Blank(s)	Blank(s)	Blank(s)	Blank(s)	Recommended but not performed, unknown reason	Blank(s)	Blank(s)	Blank(s)	9	Blank(s)	Blank(s)	Blank(s)	Blank(s)	Blank(s)	Blank(s)	Blank(s)	Blank(s)	Blank(s)	Complete dates are available and there are more than 0 days of survival	Liver	833	495	534	878	444	774	723	419	5	1977	Blank(s)	Blank(s)	Blank(s)	Dead
45-49 years	White	Female	Positive histology	Unknown	Liver	8170	Blank(s)	Blank(s)	Blank(s)	Blank(s)	Blank(s)	Blank(s)	Recommended but not performed, unknown reason	Blank(s)	Blank(s)	Blank(s)	9	Blank(s)	Blank(s)	Blank(s)	Blank(s)	Blank(s)	Blank(s)	Blank(s)	Blank(s)	Blank(s)	Complete dates are available and there are more than 0 days of survival	Liver	1085	781	766	1065	760	1053	988	715	2	1975	Blank(s)	Blank(s)	Blank(s)	Dead
45-49 years	Black	Male	Positive histology	Unknown	Liver	8170	Blank(s)	Blank(s)	Blank(s)	Blank(s)	Blank(s)	Blank(s)	Recommended but not performed, unknown reason	Blank(s)	Blank(s)	Blank(s)	9	Blank(s)	Blank(s)	Blank(s)	Blank(s)	Blank(s)	Blank(s)	Blank(s)	Blank(s)	Blank(s)	Complete dates are available and there are more than 0 days of survival	Other Cause of Death	1250	851	883	1288	861	1250	1179	819	0	1977	Blank(s)	Blank(s)	Blank(s)	Dead
75-79 years	White	Female	Positive histology	Unknown	Liver	8170	Blank(s)	Blank(s)	Blank(s)	Blank(s)	Blank(s)	Blank(s)	Recommended but not performed, unknown reason	Blank(s)	Blank(s)	Blank(s)	9	Blank(s)	Blank(s)	Blank(s)	Blank(s)	Blank(s)	Blank(s)	Blank(s)	Blank(s)	Blank(s)	Complete dates are available and there are more than 0 days of survival	Liver	1324	776	784	1328	817	1346	1230	761	1	1980	Blank(s)	Blank(s)	Blank(s)	Dead
01-04 years	White	Male	Positive histology	Poorly differentiated; Grade III	Liver	8170	Blank(s)	Blank(s)	Blank(s)	Blank(s)	Blank(s)	Blank(s)	Recommended but not performed, unknown reason	Blank(s)	Blank(s)	Blank(s)	9	Blank(s)	Blank(s)	Blank(s)	Blank(s)	Blank(s)	Blank(s)	Blank(s)	Blank(s)	Blank(s)	Complete dates are available and there are more than 0 days of survival	Liver	1085	781	766	1065	760	1053	988	715	0	1975	Blank(s)	Blank(s)	Blank(s)	Dead
50-54 years	Unknown	Male	Positive histology	Unknown	Liver	8170	Blank(s)	Blank(s)	Blank(s)	Blank(s)	Blank(s)	Blank(s)	Recommended but not performed, unknown reason	Blank(s)	Blank(s)	Blank(s)	9	Blank(s)	Blank(s)	Blank(s)	Blank(s)	Blank(s)	Blank(s)	Blank(s)	Blank(s)	Blank(s)	Complete dates are available and there are more than 0 days of survival	Liver	1250	851	883	1288	861	1250	1179	819	4	1978	Blank(s)	Blank(s)	Blank(s)	Dead
80-84 years	White	Female	Positive histology	Unknown	Liver	8170	Blank(s)	Blank(s)	Blank(s)	Blank(s)	Blank(s)	Blank(s)	Surgery performed	Blank(s)	Blank(s)	Blank(s)	90	Blank(s)	Blank(s)	Blank(s)	Blank(s)	Blank(s)	Blank(s)	Blank(s)	Blank(s)	Blank(s)	Complete dates are available and there are more than 0 days of survival	Diseases of Heart	1250	851	883	1288	861	1250	1179	819	29	1980	Blank(s)	Blank(s)	Blank(s)	Dead
75-79 years	White	Male	Positive histology	Poorly differentiated; Grade III	Liver	8170	Blank(s)	Blank(s)	Blank(s)	Blank(s)	Blank(s)	Blank(s)	Recommended but not performed, unknown reason	Blank(s)	Blank(s)	Blank(s)	9	Blank(s)	Blank(s)	Blank(s)	Blank(s)	Blank(s)	Blank(s)	Blank(s)	Blank(s)	Blank(s)	Complete dates are available and there are more than 0 days of survival	Miscellaneous Malignant Cancer	797	484	467	759	477	760	695	453	0	1980	Blank(s)	Blank(s)	Blank(s)	Dead
75-79 years	White	Male	Positive histology	Unknown	Liver	8170	Blank(s)	Blank(s)	Blank(s)	Blank(s)	Blank(s)	Blank(s)	Recommended but not performed, unknown reason	Blank(s)	Blank(s)	Blank(s)	9	Blank(s)	Blank(s)	Blank(s)	Blank(s)	Blank(s)	Blank(s)	Blank(s)	Blank(s)	Blank(s)	Complete dates are available and there are more than 0 days of survival	Liver	1324	776	784	1328	817	1346	1230	761	0	1979	Blank(s)	Blank(s)	Blank(s)	Dead
20-24 years	White	Male	Positive histology	Moderately differentiated; Grade II	Liver	8170	Blank(s)	Blank(s)	Blank(s)	Blank(s)	Blank(s)	Blank(s)	Surgery performed	Blank(s)	Blank(s)	Blank(s)	90	Blank(s)	Blank(s)	Blank(s)	Blank(s)	Blank(s)	Blank(s)	Blank(s)	Blank(s)	Blank(s)	Complete dates are available and there are more than 0 days of survival	Liver	1324	776	784	1328	817	1346	1230	761	52	1977	Blank(s)	Blank(s)	Blank(s)	Dead
65-69 years	White	Male	Positive histology	Unknown	Liver	8170	Blank(s)	Blank(s)	Blank(s)	Blank(s)	Blank(s)	Blank(s)	Not recommended, contraindicated due to other cond; autopsy only (1973-2002)	Blank(s)	Blank(s)	Blank(s)	0	Blank(s)	Blank(s)	Blank(s)	Blank(s)	Blank(s)	Blank(s)	Blank(s)	Blank(s)	Blank(s)	Not calculated because a Death Certificate Only or Autopsy Only case	Accidents and Adverse Effects	1324	776	784	1328	817	1346	1230	761	Unknown	1981	Blank(s)	Blank(s)	Blank(s)	Dead
80-84 years	White	Male	Positive histology	Moderately differentiated; Grade II	Liver	8170	Blank(s)	Blank(s)	Blank(s)	Blank(s)	Blank(s)	Blank(s)	Surgery performed	Blank(s)	Blank(s)	Blank(s)	90	Blank(s)	Blank(s)	Blank(s)	Blank(s)	Blank(s)	Blank(s)	Blank(s)	Blank(s)	Blank(s)	Complete dates are available and there are more than 0 days of survival	Diseases of Heart	797	484	467	759	477	760	695	453	16	1979	Blank(s)	Blank(s)	Blank(s)	Dead
60-64 years	White	Male	Positive histology	Unknown	Liver	8170	Blank(s)	Blank(s)	Blank(s)	Blank(s)	Blank(s)	Blank(s)	Recommended but not performed, unknown reason	Blank(s)	Blank(s)	Blank(s)	9	Blank(s)	Blank(s)	Blank(s)	Blank(s)	Blank(s)	Blank(s)	Blank(s)	Blank(s)	Blank(s)	Complete dates are available and there are more than 0 days of survival	Diseases of Heart	1085	781	766	1065	760	1053	988	715	11	1979	Blank(s)	Blank(s)	Blank(s)	Dead
75-79 years	White	Male	Positive histology	Unknown	Liver	8170	Blank(s)	Blank(s)	Blank(s)	Blank(s)	Blank(s)	Blank(s)	Recommended but not performed, unknown reason	Blank(s)	Blank(s)	Blank(s)	9	Blank(s)	Blank(s)	Blank(s)	Blank(s)	Blank(s)	Blank(s)	Blank(s)	Blank(s)	Blank(s)	Complete dates are available and there are more than 0 days of survival	Liver	1250	851	883	1288	861	1250	1179	819	3	1976	Blank(s)	Blank(s)	Blank(s)	Dead
70-74 years	White	Male	Positive histology	Undifferentiated; anaplastic; Grade IV	Liver	8170	Blank(s)	Blank(s)	Blank(s)	Blank(s)	Blank(s)	Blank(s)	Recommended but not performed, unknown reason	Blank(s)	Blank(s)	Blank(s)	9	Blank(s)	Blank(s)	Blank(s)	Blank(s)	Blank(s)	Blank(s)	Blank(s)	Blank(s)	Blank(s)	Complete dates are available and there are more than 0 days of survival	Liver	1250	851	883	1288	861	1250	1179	819	2	1977	Blank(s)	Blank(s)	Blank(s)	Dead
70-74 years	White	Male	Positive histology	Unknown	Liver	8170	Blank(s)	Blank(s)	Blank(s)	Blank(s)	Blank(s)	Blank(s)	Not recommended, contraindicated due to other cond; autopsy only (1973-2002)	Blank(s)	Blank(s)	Blank(s)	0	Blank(s)	Blank(s)	Blank(s)	Blank(s)	Blank(s)	Blank(s)	Blank(s)	Blank(s)	Blank(s)	Not calculated because a Death Certificate Only or Autopsy Only case	Prostate	1324	776	784	1328	817	1346	1230	761	Unknown	1979	Blank(s)	Blank(s)	Blank(s)	Dead
55-59 years	White	Female	Positive histology	Unknown	Liver	8170	Blank(s)	Blank(s)	Blank(s)	Blank(s)	Blank(s)	Blank(s)	Recommended but not performed, unknown reason	Blank(s)	Blank(s)	Blank(s)	9	Blank(s)	Blank(s)	Blank(s)	Blank(s)	Blank(s)	Blank(s)	Blank(s)	Blank(s)	Blank(s)	Complete dates are available and there are more than 0 days of survival	Esophagus	1324	776	784	1328	817	1346	1230	761	27	1976	Blank(s)	Blank(s)	Blank(s)	Dead
65-69 years	White	Female	Positive histology	Undifferentiated; anaplastic; Grade IV	Liver	8170	Blank(s)	Blank(s)	Blank(s)	Blank(s)	Blank(s)	Blank(s)	Recommended but not performed, unknown reason	Blank(s)	Blank(s)	Blank(s)	9	Blank(s)	Blank(s)	Blank(s)	Blank(s)	Blank(s)	Blank(s)	Blank(s)	Blank(s)	Blank(s)	Complete dates are available and there are more than 0 days of survival	Liver	1250	851	883	1288	861	1250	1179	819	5	1976	Blank(s)	Blank(s)	Blank(s)	Dead
70-74 years	Other (American Indian/AK Native, Asian/Pacific Islander)	Male	Positive histology	Unknown	Liver	8170	Blank(s)	Blank(s)	Blank(s)	Blank(s)	Blank(s)	Blank(s)	Recommended but not performed, unknown reason	Blank(s)	Blank(s)	Blank(s)	9	Blank(s)	Blank(s)	Blank(s)	Blank(s)	Blank(s)	Blank(s)	Blank(s)	Blank(s)	Blank(s)	Complete dates are available and there are more than 0 days of survival	Diseases of Heart	1324	776	784	1328	817	1346	1230	761	1	1980	Blank(s)	Blank(s)	Blank(s)	Dead
80-84 years	White	Male	Positive histology	Undifferentiated; anaplastic; Grade IV	Liver	8170	Blank(s)	Blank(s)	Blank(s)	Blank(s)	Blank(s)	Blank(s)	Recommended but not performed, unknown reason	Blank(s)	Blank(s)	Blank(s)	9	Blank(s)	Blank(s)	Blank(s)	Blank(s)	Blank(s)	Blank(s)	Blank(s)	Blank(s)	Blank(s)	Complete dates are available and there are more than 0 days of survival	Liver	1250	851	883	1288	861	1250	1179	819	0	1976	Blank(s)	Blank(s)	Blank(s)	Dead
70-74 years	Other (American Indian/AK Native, Asian/Pacific Islander)	Male	Positive histology	Poorly differentiated; Grade III	Liver	8170	Blank(s)	Blank(s)	Blank(s)	Blank(s)	Blank(s)	Blank(s)	Recommended but not performed, unknown reason	Blank(s)	Blank(s)	Blank(s)	9	Blank(s)	Blank(s)	Blank(s)	Blank(s)	Blank(s)	Blank(s)	Blank(s)	Blank(s)	Blank(s)	Complete dates are available and there are more than 0 days of survival	Liver	1324	776	784	1328	817	1346	1230	761	2	1978	Blank(s)	Blank(s)	Blank(s)	Dead
45-49 years	Black	Male	Positive histology	Unknown	Liver	8170	Blank(s)	Blank(s)	Blank(s)	Blank(s)	Blank(s)	Blank(s)	Not recommended, contraindicated due to other cond; autopsy only (1973-2002)	Blank(s)	Blank(s)	Blank(s)	0	Blank(s)	Blank(s)	Blank(s)	Blank(s)	Blank(s)	Blank(s)	Blank(s)	Blank(s)	Blank(s)	Not calculated because a Death Certificate Only or Autopsy Only case	Liver	1250	851	883	1288	861	1250	1179	819	Unknown	1978	Blank(s)	Blank(s)	Blank(s)	Dead
65-69 years	White	Male	Radiography without microscopic confirm	Unknown	Liver	8170	Blank(s)	Blank(s)	Blank(s)	Blank(s)	Blank(s)	Blank(s)	Recommended but not performed, unknown reason	Blank(s)	Blank(s)	Blank(s)	9	Blank(s)	Blank(s)	Blank(s)	Blank(s)	Blank(s)	Blank(s)	Blank(s)	Blank(s)	Blank(s)	Complete dates are available and there are 0 days of survival	Liver	1085	781	766	1065	760	1053	988	715	0	1976	Blank(s)	Blank(s)	Blank(s)	Dead
75-79 years	White	Female	Positive histology	Unknown	Liver	8170	Blank(s)	Blank(s)	88	0	Blank(s)	Blank(s)	Not recommended	0	0	0	Blank(s)	Blank(s)	0	Blank(s)	Blank(s)	Blank(s)	Blank(s)	Blank(s)	Blank(s)	Blank(s)	Complete dates are available and there are more than 0 days of survival	Liver	1085	781	766	1065	760	1053	988	715	4	2002	Blank(s)	Blank(s)	Blank(s)	Dead
80-84 years	White	Female	Positive histology	Poorly differentiated; Grade III	Liver	8010	Blank(s)	Blank(s)	Blank(s)	Blank(s)	Blank(s)	Blank(s)	Recommended but not performed, unknown reason	Blank(s)	Blank(s)	Blank(s)	9	Blank(s)	Blank(s)	Blank(s)	Blank(s)	Blank(s)	Blank(s)	Blank(s)	Blank(s)	Blank(s)	Complete dates are available and there are more than 0 days of survival	Liver	833	495	534	878	444	774	723	419	2	1979	Blank(s)	Blank(s)	Blank(s)	Dead
70-74 years	White	Female	Positive histology	Undifferentiated; anaplastic; Grade IV	Liver	8020	Blank(s)	Blank(s)	Blank(s)	Blank(s)	Blank(s)	Blank(s)	Recommended but not performed, unknown reason	Blank(s)	Blank(s)	Blank(s)	9	Blank(s)	Blank(s)	Blank(s)	Blank(s)	Blank(s)	Blank(s)	Blank(s)	Blank(s)	Blank(s)	Complete dates are available and there are more than 0 days of survival	Liver	1250	851	883	1288	861	1250	1179	819	6	1979	Blank(s)	Blank(s)	Blank(s)	Dead
70-74 years	White	Female	Positive histology	Unknown	Liver	8830	Blank(s)	Blank(s)	Blank(s)	Blank(s)	Blank(s)	Blank(s)	Recommended but not performed, unknown reason	Blank(s)	Blank(s)	Blank(s)	9	Blank(s)	Blank(s)	Blank(s)	Blank(s)	Blank(s)	Blank(s)	Blank(s)	Blank(s)	Blank(s)	Complete dates are available and there are more than 0 days of survival	Liver	1324	776	784	1328	817	1346	1230	761	0	1977	Blank(s)	Blank(s)	Blank(s)	Dead
75-79 years	Black	Female	Positive histology	Unknown	Liver	8170	Blank(s)	Blank(s)	Blank(s)	Blank(s)	Blank(s)	Blank(s)	Recommended but not performed, unknown reason	Blank(s)	Blank(s)	Blank(s)	9	Blank(s)	Blank(s)	Blank(s)	Blank(s)	Blank(s)	Blank(s)	Blank(s)	Blank(s)	Blank(s)	Complete dates are available and there are more than 0 days of survival	Liver	1250	851	883	1288	861	1250	1179	819	2	1975	Blank(s)	Blank(s)	Blank(s)	Dead
75-79 years	White	Male	Positive histology	Unknown	Liver	8170	Blank(s)	Blank(s)	Blank(s)	Blank(s)	Blank(s)	Blank(s)	Recommended but not performed, unknown reason	Blank(s)	Blank(s)	Blank(s)	9	Blank(s)	Blank(s)	Blank(s)	Blank(s)	Blank(s)	Blank(s)	Blank(s)	Blank(s)	Blank(s)	Complete dates are available and there are more than 0 days of survival	Liver	1324	776	784	1328	817	1346	1230	761	0	1977	Blank(s)	Blank(s)	Blank(s)	Dead
75-79 years	Other (American Indian/AK Native, Asian/Pacific Islander)	Male	Positive histology	Unknown	Liver	8170	Blank(s)	Blank(s)	Blank(s)	Blank(s)	Blank(s)	Blank(s)	Recommended but not performed, unknown reason	Blank(s)	Blank(s)	Blank(s)	9	Blank(s)	Blank(s)	Blank(s)	Blank(s)	Blank(s)	Blank(s)	Blank(s)	Blank(s)	Blank(s)	Complete dates are available and there are more than 0 days of survival	Diseases of Heart	1324	776	784	1328	817	1346	1230	761	0	1978	Blank(s)	Blank(s)	Blank(s)	Dead
55-59 years	White	Female	Positive histology	Well differentiated; Grade I	Liver	8170	Blank(s)	Blank(s)	Blank(s)	Blank(s)	Blank(s)	Blank(s)	Surgery performed	Blank(s)	Blank(s)	Blank(s)	90	Blank(s)	Blank(s)	Blank(s)	Blank(s)	Blank(s)	Blank(s)	Blank(s)	Blank(s)	Blank(s)	Complete dates are available and there are more than 0 days of survival	Chronic Obstructive Pulmonary Disease and Allied Cond	1324	776	784	1328	817	1346	1230	761	142	1976	Blank(s)	Blank(s)	Blank(s)	Dead
65-69 years	Other (American Indian/AK Native, Asian/Pacific Islander)	Male	Positive histology	Unknown	Liver	8170	Blank(s)	Blank(s)	Blank(s)	Blank(s)	Blank(s)	Blank(s)	Recommended but not performed, unknown reason	Blank(s)	Blank(s)	Blank(s)	9	Blank(s)	Blank(s)	Blank(s)	Blank(s)	Blank(s)	Blank(s)	Blank(s)	Blank(s)	Blank(s)	Complete dates are available and there are more than 0 days of survival	Liver	1250	851	883	1288	861	1250	1179	819	3	1979	Blank(s)	Blank(s)	Blank(s)	Dead
65-69 years	White	Female	Positive histology	Poorly differentiated; Grade III	Liver	8170	Blank(s)	Blank(s)	Blank(s)	Blank(s)	Blank(s)	Blank(s)	Surgery performed	Blank(s)	Blank(s)	Blank(s)	90	Blank(s)	Blank(s)	Blank(s)	Blank(s)	Blank(s)	Blank(s)	Blank(s)	Blank(s)	Blank(s)	Complete dates are available and there are more than 0 days of survival	Pneumonia and Influenza	1250	851	883	1288	861	1250	1179	819	199	1978	Blank(s)	Blank(s)	Blank(s)	Dead
65-69 years	Other (American Indian/AK Native, Asian/Pacific Islander)	Male	Positive histology	Unknown	Liver	8170	Blank(s)	Blank(s)	Blank(s)	Blank(s)	Blank(s)	Blank(s)	Recommended but not performed, unknown reason	Blank(s)	Blank(s)	Blank(s)	9	Blank(s)	Blank(s)	Blank(s)	Blank(s)	Blank(s)	Blank(s)	Blank(s)	Blank(s)	Blank(s)	Complete dates are available and there are more than 0 days of survival	Liver	1324	776	784	1328	817	1346	1230	761	10	1979	Blank(s)	Blank(s)	Blank(s)	Dead
15-19 years	White	Male	Positive histology	Unknown	Liver	8170	Blank(s)	Blank(s)	Blank(s)	Blank(s)	Blank(s)	Blank(s)	Surgery performed	Blank(s)	Blank(s)	Blank(s)	90	Blank(s)	Blank(s)	Blank(s)	Blank(s)	Blank(s)	Blank(s)	Blank(s)	Blank(s)	Blank(s)	Complete dates are available and there are more than 0 days of survival	Liver	1085	781	766	1065	760	1053	988	715	7	1987	Blank(s)	Blank(s)	Blank(s)	Dead
75-79 years	White	Male	Positive histology	Moderately differentiated; Grade II	Liver	8170	Blank(s)	Blank(s)	Blank(s)	Blank(s)	Blank(s)	Blank(s)	Recommended but not performed, unknown reason	Blank(s)	Blank(s)	Blank(s)	9	Blank(s)	Blank(s)	Blank(s)	Blank(s)	Blank(s)	Blank(s)	Blank(s)	Blank(s)	Blank(s)	Incomplete dates are available and there cannot be zero days of follow-up	Liver	1250	851	883	1288	861	1250	1179	819	19	1976	Blank(s)	Blank(s)	Blank(s)	Dead
80-84 years	Other (American Indian/AK Native, Asian/Pacific Islander)	Female	Positive exfoliative cytology, no positive histology	Unknown	Liver	8170	Blank(s)	Blank(s)	88	Blank(s)	Blank(s)	Blank(s)	Not recommended	Blank(s)	Blank(s)	Blank(s)	0	Blank(s)	0	Blank(s)	Blank(s)	Blank(s)	Blank(s)	Blank(s)	Blank(s)	Blank(s)	Complete dates are available and there are more than 0 days of survival	Colon excluding Rectum	797	484	467	759	477	760	695	453	1	1990	Blank(s)	Blank(s)	Blank(s)	Dead
60-64 years	Black	Male	Positive histology	Unknown	Liver	8170	Blank(s)	Blank(s)	Blank(s)	Blank(s)	Blank(s)	Blank(s)	Recommended but not performed, unknown reason	Blank(s)	Blank(s)	Blank(s)	9	Blank(s)	Blank(s)	Blank(s)	Blank(s)	Blank(s)	Blank(s)	Blank(s)	Blank(s)	Blank(s)	Complete dates are available and there are more than 0 days of survival	Pancreas	1250	851	883	1288	861	1250	1179	819	0	1977	Blank(s)	Blank(s)	Blank(s)	Dead
70-74 years	White	Male	Positive histology	Moderately differentiated; Grade II	Liver	8170	Blank(s)	Blank(s)	88	0	Blank(s)	Blank(s)	Not recommended	0	0	0	Blank(s)	Blank(s)	0	Blank(s)	Blank(s)	Blank(s)	Blank(s)	Blank(s)	Blank(s)	Blank(s)	Complete dates are available and there are more than 0 days of survival	Liver	1250	851	883	1288	861	1250	1179	819	1	2001	Blank(s)	Blank(s)	Blank(s)	Dead
55-59 years	Other (American Indian/AK Native, Asian/Pacific Islander)	Female	Positive histology	Poorly differentiated; Grade III	Liver	8170	Blank(s)	Blank(s)	Blank(s)	Blank(s)	Blank(s)	Blank(s)	Recommended but not performed, unknown reason	Blank(s)	Blank(s)	Blank(s)	9	Blank(s)	Blank(s)	Blank(s)	Blank(s)	Blank(s)	Blank(s)	Blank(s)	Blank(s)	Blank(s)	Complete dates are available and there are more than 0 days of survival	Liver	1250	851	883	1288	861	1250	1179	819	0	1980	Blank(s)	Blank(s)	Blank(s)	Dead
50-54 years	Other (American Indian/AK Native, Asian/Pacific Islander)	Male	Positive histology	Unknown	Liver	8170	Blank(s)	Blank(s)	Blank(s)	Blank(s)	Blank(s)	Blank(s)	Recommended but not performed, unknown reason	Blank(s)	Blank(s)	Blank(s)	9	Blank(s)	Blank(s)	Blank(s)	Blank(s)	Blank(s)	Blank(s)	Blank(s)	Blank(s)	Blank(s)	Complete dates are available and there are more than 0 days of survival	Liver	1250	851	883	1288	861	1250	1179	819	0	1978	Blank(s)	Blank(s)	Blank(s)	Dead
55-59 years	Other (American Indian/AK Native, Asian/Pacific Islander)	Male	Positive histology	Poorly differentiated; Grade III	Liver	8010	Blank(s)	Blank(s)	Blank(s)	Blank(s)	Blank(s)	Blank(s)	Recommended but not performed, unknown reason	Blank(s)	Blank(s)	Blank(s)	9	Blank(s)	Blank(s)	Blank(s)	Blank(s)	Blank(s)	Blank(s)	Blank(s)	Blank(s)	Blank(s)	Complete dates are available and there are more than 0 days of survival	State DC not available or state DC available but no COD	1250	851	883	1288	861	1250	1179	819	2	1980	Blank(s)	Blank(s)	Blank(s)	Dead
50-54 years	Other (American Indian/AK Native, Asian/Pacific Islander)	Male	Positive histology	Unknown	Liver	8170	Blank(s)	Blank(s)	Blank(s)	Blank(s)	Blank(s)	Blank(s)	Recommended but not performed, unknown reason	Blank(s)	Blank(s)	Blank(s)	9	Blank(s)	Blank(s)	Blank(s)	Blank(s)	Blank(s)	Blank(s)	Blank(s)	Blank(s)	Blank(s)	Complete dates are available and there are more than 0 days of survival	Liver	1324	776	784	1328	817	1346	1230	761	0	1981	Blank(s)	Blank(s)	Blank(s)	Dead
70-74 years	Black	Male	Positive histology	Unknown	Liver	8170	Blank(s)	Blank(s)	Blank(s)	Blank(s)	Blank(s)	Blank(s)	Recommended but not performed, unknown reason	Blank(s)	Blank(s)	Blank(s)	9	Blank(s)	Blank(s)	Blank(s)	Blank(s)	Blank(s)	Blank(s)	Blank(s)	Blank(s)	Blank(s)	Complete dates are available and there are more than 0 days of survival	Liver	1324	776	784	1328	817	1346	1230	761	0	1981	Blank(s)	Blank(s)	Blank(s)	Dead
75-79 years	White	Female	Positive exfoliative cytology, no positive histology	Unknown	Liver	8170	Blank(s)	Blank(s)	88	Blank(s)	Blank(s)	Blank(s)	Not recommended	Blank(s)	Blank(s)	Blank(s)	0	Blank(s)	0	Blank(s)	Blank(s)	Blank(s)	Blank(s)	Blank(s)	Blank(s)	Blank(s)	Complete dates are available and there are more than 0 days of survival	Liver	1250	851	883	1288	861	1250	1179	819	0	1991	Blank(s)	Blank(s)	Blank(s)	Dead
60-64 years	Black	Male	Positive histology	Poorly differentiated; Grade III	Liver	8170	Blank(s)	Blank(s)	Blank(s)	Blank(s)	Blank(s)	Blank(s)	Recommended but not performed, unknown reason	Blank(s)	Blank(s)	Blank(s)	9	Blank(s)	Blank(s)	Blank(s)	Blank(s)	Blank(s)	Blank(s)	Blank(s)	Blank(s)	Blank(s)	Complete dates are available and there are more than 0 days of survival	Liver	1250	851	883	1288	861	1250	1179	819	1	1980	Blank(s)	Blank(s)	Blank(s)	Dead
55-59 years	Black	Male	Positive histology	Well differentiated; Grade I	Liver	8170	Blank(s)	Blank(s)	Blank(s)	Blank(s)	Blank(s)	Blank(s)	Recommended but not performed, unknown reason	Blank(s)	Blank(s)	Blank(s)	9	Blank(s)	Blank(s)	Blank(s)	Blank(s)	Blank(s)	Blank(s)	Blank(s)	Blank(s)	Blank(s)	Complete dates are available and there are more than 0 days of survival	Liver	1250	851	883	1288	861	1250	1179	819	7	1976	Blank(s)	Blank(s)	Blank(s)	Dead
55-59 years	White	Male	Positive histology	Unknown	Liver	8170	Blank(s)	Blank(s)	Blank(s)	Blank(s)	Blank(s)	Blank(s)	Surgery performed	Blank(s)	Blank(s)	Blank(s)	90	Blank(s)	Blank(s)	Blank(s)	Blank(s)	Blank(s)	Blank(s)	Blank(s)	Blank(s)	Blank(s)	Complete dates are available and there are more than 0 days of survival	Liver	797	484	467	759	477	760	695	453	4	1979	Blank(s)	Blank(s)	Blank(s)	Dead
60-64 years	White	Male	Positive histology	Unknown	Liver	8170	Blank(s)	Blank(s)	Blank(s)	Blank(s)	Blank(s)	Blank(s)	Recommended but not performed, unknown reason	Blank(s)	Blank(s)	Blank(s)	9	Blank(s)	Blank(s)	Blank(s)	Blank(s)	Blank(s)	Blank(s)	Blank(s)	Blank(s)	Blank(s)	Complete dates are available and there are more than 0 days of survival	Liver	1250	851	883	1288	861	1250	1179	819	0	1976	Blank(s)	Blank(s)	Blank(s)	Dead
75-79 years	White	Female	Positive histology	Unknown	Liver	8170	Blank(s)	Blank(s)	Blank(s)	Blank(s)	Blank(s)	Blank(s)	Surgery performed	Blank(s)	Blank(s)	Blank(s)	90	Blank(s)	Blank(s)	Blank(s)	Blank(s)	Blank(s)	Blank(s)	Blank(s)	Blank(s)	Blank(s)	Complete dates are available and there are more than 0 days of survival	Liver	1250	851	883	1288	861	1250	1179	819	1	1979	Blank(s)	Blank(s)	Blank(s)	Dead
70-74 years	White	Female	Positive histology	Poorly differentiated; Grade III	Liver	8170	Blank(s)	Blank(s)	Blank(s)	Blank(s)	Blank(s)	Blank(s)	Recommended but not performed, unknown reason	Blank(s)	Blank(s)	Blank(s)	9	Blank(s)	Blank(s)	Blank(s)	Blank(s)	Blank(s)	Blank(s)	Blank(s)	Blank(s)	Blank(s)	Complete dates are available and there are more than 0 days of survival	Liver	833	495	534	878	444	774	723	419	3	1980	Blank(s)	Blank(s)	Blank(s)	Dead
50-54 years	White	Male	Positive histology	Unknown	BileDuctsIntraHepat	8180	Blank(s)	Blank(s)	Blank(s)	Blank(s)	Blank(s)	Blank(s)	Recommended but not performed, unknown reason	Blank(s)	Blank(s)	Blank(s)	9	Blank(s)	Blank(s)	Blank(s)	Blank(s)	Blank(s)	Blank(s)	Blank(s)	Blank(s)	Blank(s)	Complete dates are available and there are more than 0 days of survival	Intrahepatic Bile Duct	1324	776	784	1328	817	1346	1230	761	3	1980	Blank(s)	Blank(s)	Blank(s)	Dead
70-74 years	White	Male	Positive histology	Unknown	Liver	8170	Blank(s)	Blank(s)	Blank(s)	Blank(s)	Blank(s)	Blank(s)	Recommended but not performed, unknown reason	Blank(s)	Blank(s)	Blank(s)	9	Blank(s)	Blank(s)	Blank(s)	Blank(s)	Blank(s)	Blank(s)	Blank(s)	Blank(s)	Blank(s)	Complete dates are available and there are more than 0 days of survival	Liver	1250	851	883	1288	861	1250	1179	819	1	1987	Blank(s)	Blank(s)	Blank(s)	Dead
40-44 years	White	Female	Positive histology	Unknown	Liver	8170	Blank(s)	Blank(s)	Blank(s)	Blank(s)	Blank(s)	Blank(s)	Recommended but not performed, unknown reason	Blank(s)	Blank(s)	Blank(s)	9	Blank(s)	Blank(s)	Blank(s)	Blank(s)	Blank(s)	Blank(s)	Blank(s)	Blank(s)	Blank(s)	Complete dates are available and there are more than 0 days of survival	Liver	1324	776	784	1328	817	1346	1230	761	0	1977	Blank(s)	Blank(s)	Blank(s)	Dead
85+ years	Other (American Indian/AK Native, Asian/Pacific Islander)	Male	Positive histology	Unknown	Liver	8170	Blank(s)	Blank(s)	Blank(s)	Blank(s)	Blank(s)	Blank(s)	Recommended but not performed, unknown reason	Blank(s)	Blank(s)	Blank(s)	9	Blank(s)	Blank(s)	Blank(s)	Blank(s)	Blank(s)	Blank(s)	Blank(s)	Blank(s)	Blank(s)	Complete dates are available and there are more than 0 days of survival	Diseases of Heart	1324	776	784	1328	817	1346	1230	761	0	1977	Blank(s)	Blank(s)	Blank(s)	Dead
75-79 years	White	Female	Positive histology	Unknown	Liver	8170	Blank(s)	Blank(s)	Blank(s)	Blank(s)	Blank(s)	Blank(s)	Recommended but not performed, unknown reason	Blank(s)	Blank(s)	Blank(s)	9	Blank(s)	Blank(s)	Blank(s)	Blank(s)	Blank(s)	Blank(s)	Blank(s)	Blank(s)	Blank(s)	Complete dates are available and there are more than 0 days of survival	Chronic Liver Disease and Cirrhosis	833	495	534	878	444	774	723	419	2	1977	Blank(s)	Blank(s)	Blank(s)	Dead
55-59 years	White	Male	Positive histology	Unknown	Liver	8170	Blank(s)	Blank(s)	Blank(s)	Blank(s)	Blank(s)	Blank(s)	Recommended but not performed, unknown reason	Blank(s)	Blank(s)	Blank(s)	9	Blank(s)	Blank(s)	Blank(s)	Blank(s)	Blank(s)	Blank(s)	Blank(s)	Blank(s)	Blank(s)	Complete dates are available and there are more than 0 days of survival	Liver	1250	851	883	1288	861	1250	1179	819	10	1976	Blank(s)	Blank(s)	Blank(s)	Dead
65-69 years	White	Male	Positive histology	Unknown	Liver	8170	Blank(s)	Blank(s)	Blank(s)	Blank(s)	Blank(s)	Blank(s)	Recommended but not performed, unknown reason	Blank(s)	Blank(s)	Blank(s)	9	Blank(s)	Blank(s)	Blank(s)	Blank(s)	Blank(s)	Blank(s)	Blank(s)	Blank(s)	Blank(s)	Complete dates are available and there are more than 0 days of survival	Suicide and Self-Inflicted Injury	1324	776	784	1328	817	1346	1230	761	12	1976	Blank(s)	Blank(s)	Blank(s)	Dead
65-69 years	Other (American Indian/AK Native, Asian/Pacific Islander)	Male	Positive histology	Unknown	Liver	8170	Blank(s)	Blank(s)	Blank(s)	Blank(s)	Blank(s)	Blank(s)	Recommended but not performed, unknown reason	Blank(s)	Blank(s)	Blank(s)	9	Blank(s)	Blank(s)	Blank(s)	Blank(s)	Blank(s)	Blank(s)	Blank(s)	Blank(s)	Blank(s)	Complete dates are available and there are more than 0 days of survival	Liver	1324	776	784	1328	817	1346	1230	761	1	1978	Blank(s)	Blank(s)	Blank(s)	Dead
55-59 years	White	Male	Positive histology	Unknown	Liver	8140	Blank(s)	Blank(s)	Blank(s)	Blank(s)	Blank(s)	Blank(s)	Recommended but not performed, unknown reason	Blank(s)	Blank(s)	Blank(s)	9	Blank(s)	Blank(s)	Blank(s)	Blank(s)	Blank(s)	Blank(s)	Blank(s)	Blank(s)	Blank(s)	Complete dates are available and there are more than 0 days of survival	Liver	1085	781	766	1065	760	1053	988	715	1	1978	Blank(s)	Blank(s)	Blank(s)	Dead
60-64 years	White	Male	Positive histology	Unknown	Liver	8170	Blank(s)	Blank(s)	Blank(s)	Blank(s)	Blank(s)	Blank(s)	Recommended but not performed, unknown reason	Blank(s)	Blank(s)	Blank(s)	9	Blank(s)	Blank(s)	Blank(s)	Blank(s)	Blank(s)	Blank(s)	Blank(s)	Blank(s)	Blank(s)	Complete dates are available and there are more than 0 days of survival	Chronic Liver Disease and Cirrhosis	1250	851	883	1288	861	1250	1179	819	0	1977	Blank(s)	Blank(s)	Blank(s)	Dead
55-59 years	Other (American Indian/AK Native, Asian/Pacific Islander)	Male	Positive histology	Well differentiated; Grade I	Liver	8170	Blank(s)	Blank(s)	Blank(s)	Blank(s)	Blank(s)	Blank(s)	Recommended but not performed, unknown reason	Blank(s)	Blank(s)	Blank(s)	9	Blank(s)	Blank(s)	Blank(s)	Blank(s)	Blank(s)	Blank(s)	Blank(s)	Blank(s)	Blank(s)	Complete dates are available and there are more than 0 days of survival	Liver	1324	776	784	1328	817	1346	1230	761	2	1979	Blank(s)	Blank(s)	Blank(s)	Dead
70-74 years	White	Male	Positive histology	Unknown	Liver	8170	Blank(s)	Blank(s)	Blank(s)	Blank(s)	Blank(s)	Blank(s)	Not recommended, contraindicated due to other cond; autopsy only (1973-2002)	Blank(s)	Blank(s)	Blank(s)	0	Blank(s)	Blank(s)	Blank(s)	Blank(s)	Blank(s)	Blank(s)	Blank(s)	Blank(s)	Blank(s)	Not calculated because a Death Certificate Only or Autopsy Only case	Liver	1250	851	883	1288	861	1250	1179	819	Unknown	1977	Blank(s)	Blank(s)	Blank(s)	Dead
70-74 years	Black	Male	Positive histology	Unknown	Liver	8170	Blank(s)	Blank(s)	Blank(s)	Blank(s)	Blank(s)	Blank(s)	Recommended but not performed, unknown reason	Blank(s)	Blank(s)	Blank(s)	9	Blank(s)	Blank(s)	Blank(s)	Blank(s)	Blank(s)	Blank(s)	Blank(s)	Blank(s)	Blank(s)	Complete dates are available and there are more than 0 days of survival	Liver	1250	851	883	1288	861	1250	1179	819	0	1977	Blank(s)	Blank(s)	Blank(s)	Dead
55-59 years	White	Male	Positive histology	Poorly differentiated; Grade III	Liver	8140	Blank(s)	Blank(s)	Blank(s)	Blank(s)	Blank(s)	Blank(s)	Recommended but not performed, unknown reason	Blank(s)	Blank(s)	Blank(s)	9	Blank(s)	Blank(s)	Blank(s)	Blank(s)	Blank(s)	Blank(s)	Blank(s)	Blank(s)	Blank(s)	Complete dates are available and there are more than 0 days of survival	Liver	1250	851	883	1288	861	1250	1179	819	0	1976	Blank(s)	Blank(s)	Blank(s)	Dead
80-84 years	White	Male	Positive histology	Unknown	Liver	8170	Blank(s)	Blank(s)	Blank(s)	Blank(s)	Blank(s)	Blank(s)	Recommended but not performed, unknown reason	Blank(s)	Blank(s)	Blank(s)	9	Blank(s)	Blank(s)	Blank(s)	Blank(s)	Blank(s)	Blank(s)	Blank(s)	Blank(s)	Blank(s)	Incomplete dates are available and there cannot be zero days of follow-up	Liver	1324	776	784	1328	817	1346	1230	761	4	1977	Blank(s)	Blank(s)	Blank(s)	Dead
50-54 years	Other (American Indian/AK Native, Asian/Pacific Islander)	Male	Positive histology	Unknown	Liver	8170	Blank(s)	Blank(s)	Blank(s)	Blank(s)	Blank(s)	Blank(s)	Surgery performed	Blank(s)	Blank(s)	Blank(s)	90	Blank(s)	Blank(s)	Blank(s)	Blank(s)	Blank(s)	Blank(s)	Blank(s)	Blank(s)	Blank(s)	Complete dates are available and there are more than 0 days of survival	Liver	1324	776	784	1328	817	1346	1230	761	9	1977	Blank(s)	Blank(s)	Blank(s)	Dead
50-54 years	Other (American Indian/AK Native, Asian/Pacific Islander)	Male	Positive histology	Unknown	Liver	8170	Blank(s)	Blank(s)	Blank(s)	Blank(s)	Blank(s)	Blank(s)	Recommended but not performed, unknown reason	Blank(s)	Blank(s)	Blank(s)	9	Blank(s)	Blank(s)	Blank(s)	Blank(s)	Blank(s)	Blank(s)	Blank(s)	Blank(s)	Blank(s)	Complete dates are available and there are more than 0 days of survival	Diseases of Heart	1324	776	784	1328	817	1346	1230	761	57	1977	Blank(s)	Blank(s)	Blank(s)	Dead
55-59 years	Other (American Indian/AK Native, Asian/Pacific Islander)	Male	Positive histology	Unknown	Liver	8140	Blank(s)	Blank(s)	Blank(s)	Blank(s)	Blank(s)	Blank(s)	Recommended but not performed, unknown reason	Blank(s)	Blank(s)	Blank(s)	9	Blank(s)	Blank(s)	Blank(s)	Blank(s)	Blank(s)	Blank(s)	Blank(s)	Blank(s)	Blank(s)	Complete dates are available and there are more than 0 days of survival	Pancreas	1085	781	766	1065	760	1053	988	715	10	1980	Blank(s)	Blank(s)	Blank(s)	Dead
70-74 years	Black	Female	Positive histology	Unknown	BileDuctsIntraHepat	8180	Blank(s)	Blank(s)	Blank(s)	Blank(s)	Blank(s)	Blank(s)	Recommended but not performed, unknown reason	Blank(s)	Blank(s)	Blank(s)	9	Blank(s)	Blank(s)	Blank(s)	Blank(s)	Blank(s)	Blank(s)	Blank(s)	Blank(s)	Blank(s)	Complete dates are available and there are more than 0 days of survival	Pancreas	1324	776	784	1328	817	1346	1230	761	7	1977	Blank(s)	Blank(s)	Blank(s)	Dead
75-79 years	Other (American Indian/AK Native, Asian/Pacific Islander)	Male	Positive histology	Unknown	Liver	8170	Blank(s)	Blank(s)	Blank(s)	Blank(s)	Blank(s)	Blank(s)	Recommended but not performed, unknown reason	Blank(s)	Blank(s)	Blank(s)	9	Blank(s)	Blank(s)	Blank(s)	Blank(s)	Blank(s)	Blank(s)	Blank(s)	Blank(s)	Blank(s)	Complete dates are available and there are more than 0 days of survival	Liver	1250	851	883	1288	861	1250	1179	819	2	1977	Blank(s)	Blank(s)	Blank(s)	Dead
35-39 years	Other (American Indian/AK Native, Asian/Pacific Islander)	Male	Positive histology	Unknown	Liver	8170	Blank(s)	Blank(s)	Blank(s)	Blank(s)	Blank(s)	Blank(s)	Recommended but not performed, unknown reason	Blank(s)	Blank(s)	Blank(s)	9	Blank(s)	Blank(s)	Blank(s)	Blank(s)	Blank(s)	Blank(s)	Blank(s)	Blank(s)	Blank(s)	Complete dates are available and there are more than 0 days of survival	Liver	1324	776	784	1328	817	1346	1230	761	2	1978	Blank(s)	Blank(s)	Blank(s)	Dead
60-64 years	White	Male	Positive histology	Unknown	Liver	8170	Blank(s)	Blank(s)	Blank(s)	Blank(s)	Blank(s)	Blank(s)	Recommended but not performed, unknown reason	Blank(s)	Blank(s)	Blank(s)	9	Blank(s)	Blank(s)	Blank(s)	Blank(s)	Blank(s)	Blank(s)	Blank(s)	Blank(s)	Blank(s)	Complete dates are available and there are more than 0 days of survival	Liver	1085	781	766	1065	760	1053	988	715	9	1978	Blank(s)	Blank(s)	Blank(s)	Dead
55-59 years	Other (American Indian/AK Native, Asian/Pacific Islander)	Female	Positive histology	Unknown	Liver	8170	Blank(s)	Blank(s)	Blank(s)	Blank(s)	Blank(s)	Blank(s)	Recommended but not performed, unknown reason	Blank(s)	Blank(s)	Blank(s)	9	Blank(s)	Blank(s)	Blank(s)	Blank(s)	Blank(s)	Blank(s)	Blank(s)	Blank(s)	Blank(s)	Complete dates are available and there are more than 0 days of survival	Breast	1250	851	883	1288	861	1250	1179	819	90	1977	Blank(s)	Blank(s)	Blank(s)	Dead
70-74 years	Other (American Indian/AK Native, Asian/Pacific Islander)	Female	Positive histology	Unknown	Liver	8170	Blank(s)	Blank(s)	Blank(s)	Blank(s)	Blank(s)	Blank(s)	Recommended but not performed, unknown reason	Blank(s)	Blank(s)	Blank(s)	9	Blank(s)	Blank(s)	Blank(s)	Blank(s)	Blank(s)	Blank(s)	Blank(s)	Blank(s)	Blank(s)	Complete dates are available and there are more than 0 days of survival	Liver	1324	776	784	1328	817	1346	1230	761	1	1977	Blank(s)	Blank(s)	Blank(s)	Dead
65-69 years	White	Male	Positive histology	Unknown	Liver	8170	Blank(s)	Blank(s)	Blank(s)	Blank(s)	Blank(s)	Blank(s)	Recommended but not performed, unknown reason	Blank(s)	Blank(s)	Blank(s)	9	Blank(s)	Blank(s)	Blank(s)	Blank(s)	Blank(s)	Blank(s)	Blank(s)	Blank(s)	Blank(s)	Complete dates are available and there are more than 0 days of survival	Liver	1085	781	766	1065	760	1053	988	715	0	1978	Blank(s)	Blank(s)	Blank(s)	Dead
55-59 years	White	Female	Positive histology	Unknown	Liver	8170	Blank(s)	Blank(s)	Blank(s)	Blank(s)	Blank(s)	Blank(s)	Recommended but not performed, unknown reason	Blank(s)	Blank(s)	Blank(s)	9	Blank(s)	Blank(s)	Blank(s)	Blank(s)	Blank(s)	Blank(s)	Blank(s)	Blank(s)	Blank(s)	Complete dates are available and there are more than 0 days of survival	Liver	1250	851	883	1288	861	1250	1179	819	2	1976	Blank(s)	Blank(s)	Blank(s)	Dead
70-74 years	White	Male	Positive histology	Unknown	Liver	8170	Blank(s)	Blank(s)	Blank(s)	Blank(s)	Blank(s)	Blank(s)	Recommended but not performed, unknown reason	Blank(s)	Blank(s)	Blank(s)	9	Blank(s)	Blank(s)	Blank(s)	Blank(s)	Blank(s)	Blank(s)	Blank(s)	Blank(s)	Blank(s)	Complete dates are available and there are more than 0 days of survival	Stomach and Duodenal Ulcers	797	484	467	759	477	760	695	453	0	1976	Blank(s)	Blank(s)	Blank(s)	Dead
60-64 years	White	Female	Positive histology	Unknown	Liver	8170	Blank(s)	Blank(s)	Blank(s)	Blank(s)	Blank(s)	Blank(s)	Recommended but not performed, unknown reason	Blank(s)	Blank(s)	Blank(s)	9	Blank(s)	Blank(s)	Blank(s)	Blank(s)	Blank(s)	Blank(s)	Blank(s)	Blank(s)	Blank(s)	Complete dates are available and there are more than 0 days of survival	Liver	797	484	467	759	477	760	695	453	31	1978	Blank(s)	Blank(s)	Blank(s)	Dead
75-79 years	White	Male	Positive histology	Unknown	Liver	8170	Blank(s)	Blank(s)	Blank(s)	Blank(s)	Blank(s)	Blank(s)	Not recommended, contraindicated due to other cond; autopsy only (1973-2002)	Blank(s)	Blank(s)	Blank(s)	0	Blank(s)	Blank(s)	Blank(s)	Blank(s)	Blank(s)	Blank(s)	Blank(s)	Blank(s)	Blank(s)	Not calculated because a Death Certificate Only or Autopsy Only case	Liver	1324	776	784	1328	817	1346	1230	761	Unknown	1977	Blank(s)	Blank(s)	Blank(s)	Dead
80-84 years	Black	Female	Positive histology	Unknown	Liver	8170	Blank(s)	Blank(s)	Blank(s)	Blank(s)	Blank(s)	Blank(s)	Recommended but not performed, unknown reason	Blank(s)	Blank(s)	Blank(s)	9	Blank(s)	Blank(s)	Blank(s)	Blank(s)	Blank(s)	Blank(s)	Blank(s)	Blank(s)	Blank(s)	Complete dates are available and there are more than 0 days of survival	Liver	1250	851	883	1288	861	1250	1179	819	0	1976	Blank(s)	Blank(s)	Blank(s)	Dead
75-79 years	Black	Male	Positive histology	Unknown	Liver	8170	Blank(s)	Blank(s)	Blank(s)	Blank(s)	Blank(s)	Blank(s)	Recommended but not performed, unknown reason	Blank(s)	Blank(s)	Blank(s)	9	Blank(s)	Blank(s)	Blank(s)	Blank(s)	Blank(s)	Blank(s)	Blank(s)	Blank(s)	Blank(s)	Complete dates are available and there are more than 0 days of survival	Liver	1250	851	883	1288	861	1250	1179	819	1	1979	Blank(s)	Blank(s)	Blank(s)	Dead
55-59 years	Other (American Indian/AK Native, Asian/Pacific Islander)	Male	Positive histology	Poorly differentiated; Grade III	Liver	8170	Blank(s)	Blank(s)	Blank(s)	Blank(s)	Blank(s)	Blank(s)	Recommended but not performed, unknown reason	Blank(s)	Blank(s)	Blank(s)	9	Blank(s)	Blank(s)	Blank(s)	Blank(s)	Blank(s)	Blank(s)	Blank(s)	Blank(s)	Blank(s)	Complete dates are available and there are more than 0 days of survival	Liver	1324	776	784	1328	817	1346	1230	761	1	1979	Blank(s)	Blank(s)	Blank(s)	Dead
75-79 years	Other (American Indian/AK Native, Asian/Pacific Islander)	Male	Positive histology	Unknown	Liver	8170	Blank(s)	Blank(s)	Blank(s)	Blank(s)	Blank(s)	Blank(s)	Recommended but not performed, unknown reason	Blank(s)	Blank(s)	Blank(s)	9	Blank(s)	Blank(s)	Blank(s)	Blank(s)	Blank(s)	Blank(s)	Blank(s)	Blank(s)	Blank(s)	Complete dates are available and there are more than 0 days of survival	Liver	1324	776	784	1328	817	1346	1230	761	15	1976	Blank(s)	Blank(s)	Blank(s)	Dead
40-44 years	Other (American Indian/AK Native, Asian/Pacific Islander)	Male	Positive histology	Unknown	Liver	8170	Blank(s)	Blank(s)	Blank(s)	Blank(s)	Blank(s)	Blank(s)	Recommended but not performed, unknown reason	Blank(s)	Blank(s)	Blank(s)	9	Blank(s)	Blank(s)	Blank(s)	Blank(s)	Blank(s)	Blank(s)	Blank(s)	Blank(s)	Blank(s)	Complete dates are available and there are more than 0 days of survival	Liver	1324	776	784	1328	817	1346	1230	761	4	1975	Blank(s)	Blank(s)	Blank(s)	Dead
75-79 years	Black	Male	Positive histology	Unknown	Liver	8170	Blank(s)	Blank(s)	Blank(s)	Blank(s)	Blank(s)	Blank(s)	Recommended but not performed, unknown reason	Blank(s)	Blank(s)	Blank(s)	9	Blank(s)	Blank(s)	Blank(s)	Blank(s)	Blank(s)	Blank(s)	Blank(s)	Blank(s)	Blank(s)	Complete dates are available and there are more than 0 days of survival	Liver	1324	776	784	1328	817	1346	1230	761	3	1983	Blank(s)	Blank(s)	Blank(s)	Dead
75-79 years	White	Male	Positive histology	Unknown	Liver	8170	Blank(s)	Blank(s)	Blank(s)	Blank(s)	Blank(s)	Blank(s)	Recommended but not performed, unknown reason	Blank(s)	Blank(s)	Blank(s)	9	Blank(s)	Blank(s)	Blank(s)	Blank(s)	Blank(s)	Blank(s)	Blank(s)	Blank(s)	Blank(s)	Complete dates are available and there are more than 0 days of survival	Liver	1324	776	784	1328	817	1346	1230	761	5	1982	Blank(s)	Blank(s)	Blank(s)	Dead
85+ years	White	Male	Positive histology	Poorly differentiated; Grade III	Liver	8170	Blank(s)	Blank(s)	Blank(s)	Blank(s)	Blank(s)	Blank(s)	Recommended but not performed, unknown reason	Blank(s)	Blank(s)	Blank(s)	9	Blank(s)	Blank(s)	Blank(s)	Blank(s)	Blank(s)	Blank(s)	Blank(s)	Blank(s)	Blank(s)	Complete dates are available and there are more than 0 days of survival	Liver	1324	776	784	1328	817	1346	1230	761	1	1975	Blank(s)	Blank(s)	Blank(s)	Dead
45-49 years	White	Male	Positive histology	Unknown	Liver	8140	Blank(s)	Blank(s)	Blank(s)	Blank(s)	Blank(s)	Blank(s)	Recommended but not performed, unknown reason	Blank(s)	Blank(s)	Blank(s)	9	Blank(s)	Blank(s)	Blank(s)	Blank(s)	Blank(s)	Blank(s)	Blank(s)	Blank(s)	Blank(s)	Complete dates are available and there are more than 0 days of survival	Miscellaneous Malignant Cancer	1324	776	784	1328	817	1346	1230	761	19	1978	Blank(s)	Blank(s)	Blank(s)	Dead
70-74 years	Other (American Indian/AK Native, Asian/Pacific Islander)	Male	Positive histology	Unknown	Liver	9120	Blank(s)	Blank(s)	Blank(s)	Blank(s)	Blank(s)	Blank(s)	Recommended but not performed, unknown reason	Blank(s)	Blank(s)	Blank(s)	9	Blank(s)	Blank(s)	Blank(s)	Blank(s)	Blank(s)	Blank(s)	Blank(s)	Blank(s)	Blank(s)	Complete dates are available and there are more than 0 days of survival	Non-Hodgkin Lymphoma	1324	776	784	1328	817	1346	1230	761	0	1975	Blank(s)	Blank(s)	Blank(s)	Dead
60-64 years	Black	Female	Positive histology	Unknown	Liver	8170	Blank(s)	Blank(s)	Blank(s)	Blank(s)	Blank(s)	Blank(s)	Recommended but not performed, unknown reason	Blank(s)	Blank(s)	Blank(s)	9	Blank(s)	Blank(s)	Blank(s)	Blank(s)	Blank(s)	Blank(s)	Blank(s)	Blank(s)	Blank(s)	Complete dates are available and there are more than 0 days of survival	Liver	1324	776	784	1328	817	1346	1230	761	0	1980	Blank(s)	Blank(s)	Blank(s)	Dead
80-84 years	Other (American Indian/AK Native, Asian/Pacific Islander)	Male	Radiography without microscopic confirm	Unknown	Liver	8170	Blank(s)	Blank(s)	Blank(s)	Blank(s)	Blank(s)	Blank(s)	Recommended but not performed, unknown reason	Blank(s)	Blank(s)	Blank(s)	9	Blank(s)	Blank(s)	Blank(s)	Blank(s)	Blank(s)	Blank(s)	Blank(s)	Blank(s)	Blank(s)	Incomplete dates are available and there cannot be zero days of follow-up	Liver	1324	776	784	1328	817	1346	1230	761	2	1976	Blank(s)	Blank(s)	Blank(s)	Dead
70-74 years	White	Female	Radiography without microscopic confirm	Unknown	Liver	8170	Blank(s)	Blank(s)	Blank(s)	Blank(s)	Blank(s)	Blank(s)	Recommended but not performed, unknown reason	Blank(s)	Blank(s)	Blank(s)	9	Blank(s)	Blank(s)	Blank(s)	Blank(s)	Blank(s)	Blank(s)	Blank(s)	Blank(s)	Blank(s)	Complete dates are available and there are more than 0 days of survival	Liver	1324	776	784	1328	817	1346	1230	761	0	1985	Blank(s)	Blank(s)	Blank(s)	Dead
55-59 years	Other (American Indian/AK Native, Asian/Pacific Islander)	Male	Positive histology	Unknown	Liver	8170	Blank(s)	Blank(s)	Blank(s)	Blank(s)	Blank(s)	Blank(s)	Surgery performed	Blank(s)	Blank(s)	Blank(s)	90	Blank(s)	Blank(s)	Blank(s)	Blank(s)	Blank(s)	Blank(s)	Blank(s)	Blank(s)	Blank(s)	Complete dates are available and there are more than 0 days of survival	Liver	797	484	467	759	477	760	695	453	57	1977	Blank(s)	Blank(s)	Blank(s)	Dead
65-69 years	White	Male	Positive histology	Unknown	Liver	8170	Blank(s)	Blank(s)	Blank(s)	Blank(s)	Blank(s)	Blank(s)	Surgery performed	Blank(s)	Blank(s)	Blank(s)	90	Blank(s)	Blank(s)	Blank(s)	Blank(s)	Blank(s)	Blank(s)	Blank(s)	Blank(s)	Blank(s)	Complete dates are available and there are more than 0 days of survival	Liver	1324	776	784	1328	817	1346	1230	761	0	1975	Blank(s)	Blank(s)	Blank(s)	Dead
45-49 years	Other (American Indian/AK Native, Asian/Pacific Islander)	Male	Positive histology	Unknown	Liver	8170	Blank(s)	Blank(s)	Blank(s)	Blank(s)	Blank(s)	Blank(s)	Surgery performed	Blank(s)	Blank(s)	Blank(s)	90	Blank(s)	Blank(s)	Blank(s)	Blank(s)	Blank(s)	Blank(s)	Blank(s)	Blank(s)	Blank(s)	Complete dates are available and there are more than 0 days of survival	Liver	1324	776	784	1328	817	1346	1230	761	0	1977	Blank(s)	Blank(s)	Blank(s)	Dead
00 years	Other (American Indian/AK Native, Asian/Pacific Islander)	Female	Positive histology	Unknown	Liver	8970	Blank(s)	Blank(s)	Blank(s)	Blank(s)	Blank(s)	Blank(s)	Surgery performed	Blank(s)	Blank(s)	Blank(s)	90	Blank(s)	Blank(s)	Blank(s)	Blank(s)	Blank(s)	Blank(s)	Blank(s)	Blank(s)	Blank(s)	Complete dates are available and there are more than 0 days of survival	Liver	1324	776	784	1328	817	1346	1230	761	0	1978	Blank(s)	Blank(s)	Blank(s)	Dead
85+ years	White	Female	Positive histology	Poorly differentiated; Grade III	Liver	8246	NA	II	Blank(s)	0	None	None; diagnosed at autopsy	Not recommended	Blank(s)	Blank(s)	Blank(s)	Blank(s)	Blank(s)	0	20	440	0	0	0	998	999	Complete dates are available and there are more than 0 days of survival	Miscellaneous Malignant Cancer	1324	776	784	1328	817	1346	1230	761	1	2014	NA	NA	NA	Dead
75-79 years	White	Female	Positive histology	Unknown	Liver	8170	Blank(s)	Blank(s)	Blank(s)	Blank(s)	Blank(s)	Blank(s)	Recommended but not performed, unknown reason	Blank(s)	Blank(s)	Blank(s)	9	Blank(s)	Blank(s)	Blank(s)	Blank(s)	Blank(s)	Blank(s)	Blank(s)	Blank(s)	Blank(s)	Complete dates are available and there are more than 0 days of survival	Liver	1085	781	766	1065	760	1053	988	715	0	1977	Blank(s)	Blank(s)	Blank(s)	Dead
85+ years	Other (American Indian/AK Native, Asian/Pacific Islander)	Male	Positive histology	Unknown	Liver	8170	Blank(s)	Blank(s)	88	Blank(s)	Blank(s)	Blank(s)	Not recommended	Blank(s)	Blank(s)	Blank(s)	2	Blank(s)	0	Blank(s)	Blank(s)	Blank(s)	Blank(s)	Blank(s)	Blank(s)	Blank(s)	Complete dates are available and there are more than 0 days of survival	Liver	1324	776	784	1328	817	1346	1230	761	0	1992	Blank(s)	Blank(s)	Blank(s)	Dead
80-84 years	White	Male	Positive histology	Unknown	Liver	8170	Blank(s)	Blank(s)	Blank(s)	Blank(s)	Blank(s)	Blank(s)	Recommended but not performed, unknown reason	Blank(s)	Blank(s)	Blank(s)	9	Blank(s)	Blank(s)	Blank(s)	Blank(s)	Blank(s)	Blank(s)	Blank(s)	Blank(s)	Blank(s)	Complete dates are available and there are more than 0 days of survival	Liver	1324	776	784	1328	817	1346	1230	761	4	1981	Blank(s)	Blank(s)	Blank(s)	Dead
45-49 years	Other (American Indian/AK Native, Asian/Pacific Islander)	Male	Positive histology	Unknown	Liver	8170	Blank(s)	Blank(s)	Blank(s)	Blank(s)	Blank(s)	Blank(s)	Recommended but not performed, unknown reason	Blank(s)	Blank(s)	Blank(s)	9	Blank(s)	Blank(s)	Blank(s)	Blank(s)	Blank(s)	Blank(s)	Blank(s)	Blank(s)	Blank(s)	Complete dates are available and there are more than 0 days of survival	Chronic Liver Disease and Cirrhosis	1324	776	784	1328	817	1346	1230	761	0	1979	Blank(s)	Blank(s)	Blank(s)	Dead
15-19 years	White	Male	Positive histology	Unknown	Liver	8170	Blank(s)	Blank(s)	Blank(s)	Blank(s)	Blank(s)	Blank(s)	Recommended but not performed, unknown reason	Blank(s)	Blank(s)	Blank(s)	9	Blank(s)	Blank(s)	Blank(s)	Blank(s)	Blank(s)	Blank(s)	Blank(s)	Blank(s)	Blank(s)	Complete dates are available and there are more than 0 days of survival	Liver	1085	781	766	1065	760	1053	988	715	21	1978	Blank(s)	Blank(s)	Blank(s)	Dead
65-69 years	White	Male	Positive histology	Unknown	Liver	8170	Blank(s)	Blank(s)	Blank(s)	Blank(s)	Blank(s)	Blank(s)	Recommended but not performed, unknown reason	Blank(s)	Blank(s)	Blank(s)	9	Blank(s)	Blank(s)	Blank(s)	Blank(s)	Blank(s)	Blank(s)	Blank(s)	Blank(s)	Blank(s)	Complete dates are available and there are more than 0 days of survival	Other Cause of Death	1324	776	784	1328	817	1346	1230	761	1	1975	Blank(s)	Blank(s)	Blank(s)	Dead
70-74 years	White	Male	Radiography without microscopic confirm	Unknown	Liver	8170	Blank(s)	Blank(s)	Blank(s)	Blank(s)	Blank(s)	Blank(s)	Recommended but not performed, unknown reason	Blank(s)	Blank(s)	Blank(s)	9	Blank(s)	Blank(s)	Blank(s)	Blank(s)	Blank(s)	Blank(s)	Blank(s)	Blank(s)	Blank(s)	Complete dates are available and there are more than 0 days of survival	Liver	1250	851	883	1288	861	1250	1179	819	2	1977	Blank(s)	Blank(s)	Blank(s)	Dead
65-69 years	White	Male	Positive histology	Unknown	Liver	8170	Blank(s)	Blank(s)	Blank(s)	Blank(s)	Blank(s)	Blank(s)	Recommended but not performed, unknown reason	Blank(s)	Blank(s)	Blank(s)	9	Blank(s)	Blank(s)	Blank(s)	Blank(s)	Blank(s)	Blank(s)	Blank(s)	Blank(s)	Blank(s)	Complete dates are available and there are more than 0 days of survival	Liver	797	484	467	759	477	760	695	453	0	1978	Blank(s)	Blank(s)	Blank(s)	Dead
75-79 years	White	Female	Positive histology	Undifferentiated; anaplastic; Grade IV	Liver	8170	Blank(s)	Blank(s)	Blank(s)	Blank(s)	Blank(s)	Blank(s)	Recommended but not performed, unknown reason	Blank(s)	Blank(s)	Blank(s)	9	Blank(s)	Blank(s)	Blank(s)	Blank(s)	Blank(s)	Blank(s)	Blank(s)	Blank(s)	Blank(s)	Complete dates are available and there are more than 0 days of survival	Liver	1324	776	784	1328	817	1346	1230	761	2	1975	Blank(s)	Blank(s)	Blank(s)	Dead
65-69 years	White	Female	Positive histology	Unknown	Liver	8170	Blank(s)	Blank(s)	Blank(s)	Blank(s)	Blank(s)	Blank(s)	Recommended but not performed, unknown reason	Blank(s)	Blank(s)	Blank(s)	9	Blank(s)	Blank(s)	Blank(s)	Blank(s)	Blank(s)	Blank(s)	Blank(s)	Blank(s)	Blank(s)	Complete dates are available and there are more than 0 days of survival	Liver	1324	776	784	1328	817	1346	1230	761	0	1976	Blank(s)	Blank(s)	Blank(s)	Dead
60-64 years	White	Male	Positive histology	Unknown	Liver	8170	Blank(s)	Blank(s)	Blank(s)	Blank(s)	Blank(s)	Blank(s)	Recommended but not performed, unknown reason	Blank(s)	Blank(s)	Blank(s)	9	Blank(s)	Blank(s)	Blank(s)	Blank(s)	Blank(s)	Blank(s)	Blank(s)	Blank(s)	Blank(s)	Complete dates are available and there are more than 0 days of survival	Other Cause of Death	797	484	467	759	477	760	695	453	0	1977	Blank(s)	Blank(s)	Blank(s)	Dead
45-49 years	White	Male	Positive histology	Unknown	Liver	8170	Blank(s)	Blank(s)	Blank(s)	Blank(s)	Blank(s)	Blank(s)	Recommended but not performed, unknown reason	Blank(s)	Blank(s)	Blank(s)	9	Blank(s)	Blank(s)	Blank(s)	Blank(s)	Blank(s)	Blank(s)	Blank(s)	Blank(s)	Blank(s)	Complete dates are available and there are more than 0 days of survival	Liver	797	484	467	759	477	760	695	453	3	1976	Blank(s)	Blank(s)	Blank(s)	Dead
60-64 years	White	Male	Positive histology	Unknown	Liver	8170	Blank(s)	Blank(s)	Blank(s)	Blank(s)	Blank(s)	Blank(s)	Recommended but not performed, unknown reason	Blank(s)	Blank(s)	Blank(s)	9	Blank(s)	Blank(s)	Blank(s)	Blank(s)	Blank(s)	Blank(s)	Blank(s)	Blank(s)	Blank(s)	Complete dates are available and there are more than 0 days of survival	Liver	1250	851	883	1288	861	1250	1179	819	1	1978	Blank(s)	Blank(s)	Blank(s)	Dead
75-79 years	White	Female	Positive exfoliative cytology, no positive histology	Unknown	Liver	8140	Blank(s)	Blank(s)	88	Blank(s)	Blank(s)	Blank(s)	Not recommended	Blank(s)	Blank(s)	Blank(s)	0	Blank(s)	0	Blank(s)	Blank(s)	Blank(s)	Blank(s)	Blank(s)	Blank(s)	Blank(s)	Complete dates are available and there are more than 0 days of survival	Liver	1250	851	883	1288	861	1250	1179	819	3	1988	Blank(s)	Blank(s)	Blank(s)	Dead
80-84 years	White	Female	Radiography without microscopic confirm	Unknown	Liver	8010	Blank(s)	Blank(s)	Blank(s)	Blank(s)	Blank(s)	Blank(s)	Recommended but not performed, unknown reason	Blank(s)	Blank(s)	Blank(s)	9	Blank(s)	Blank(s)	Blank(s)	Blank(s)	Blank(s)	Blank(s)	Blank(s)	Blank(s)	Blank(s)	Complete dates are available and there are more than 0 days of survival	Liver	1085	781	766	1065	760	1053	988	715	3	1978	Blank(s)	Blank(s)	Blank(s)	Dead
65-69 years	Black	Male	Radiography without microscopic confirm	Unknown	Liver	8170	IVB	IV	Blank(s)	0	None	None; diagnosed at autopsy	Not recommended	Blank(s)	Blank(s)	Blank(s)	Blank(s)	Blank(s)	0	210	440	0	40	0	10	999	Complete dates are available and there are more than 0 days of survival	Miscellaneous Malignant Cancer	1085	781	766	1065	760	1053	988	715	2	2014	T3a	N0	M1	Dead
80-84 years	White	Male	Positive histology	Poorly differentiated; Grade III	Liver	8140	Blank(s)	Blank(s)	Blank(s)	Blank(s)	Blank(s)	Blank(s)	Recommended but not performed, unknown reason	Blank(s)	Blank(s)	Blank(s)	9	Blank(s)	Blank(s)	Blank(s)	Blank(s)	Blank(s)	Blank(s)	Blank(s)	Blank(s)	Blank(s)	Complete dates are available and there are more than 0 days of survival	Intrahepatic Bile Duct	797	484	467	759	477	760	695	453	0	1979	Blank(s)	Blank(s)	Blank(s)	Dead
55-59 years	White	Female	Positive histology	Undifferentiated; anaplastic; Grade IV	Liver	8020	Blank(s)	Blank(s)	Blank(s)	Blank(s)	Blank(s)	Blank(s)	Recommended but not performed, unknown reason	Blank(s)	Blank(s)	Blank(s)	9	Blank(s)	Blank(s)	Blank(s)	Blank(s)	Blank(s)	Blank(s)	Blank(s)	Blank(s)	Blank(s)	Complete dates are available and there are more than 0 days of survival	Liver	1324	776	784	1328	817	1346	1230	761	0	1980	Blank(s)	Blank(s)	Blank(s)	Dead
50-54 years	White	Male	Positive histology	Unknown	Liver	8170	Blank(s)	Blank(s)	Blank(s)	Blank(s)	Blank(s)	Blank(s)	Recommended but not performed, unknown reason	Blank(s)	Blank(s)	Blank(s)	9	Blank(s)	Blank(s)	Blank(s)	Blank(s)	Blank(s)	Blank(s)	Blank(s)	Blank(s)	Blank(s)	Complete dates are available and there are more than 0 days of survival	Chronic Liver Disease and Cirrhosis	1324	776	784	1328	817	1346	1230	761	1	1980	Blank(s)	Blank(s)	Blank(s)	Dead
15-19 years	White	Male	Positive histology	Unknown	Liver	8970	Blank(s)	Blank(s)	Blank(s)	Blank(s)	Blank(s)	Blank(s)	Recommended but not performed, unknown reason	Blank(s)	Blank(s)	Blank(s)	9	Blank(s)	Blank(s)	Blank(s)	Blank(s)	Blank(s)	Blank(s)	Blank(s)	Blank(s)	Blank(s)	Complete dates are available and there are more than 0 days of survival	Miscellaneous Malignant Cancer	833	495	534	878	444	774	723	419	174	1977	Blank(s)	Blank(s)	Blank(s)	Dead
60-64 years	White	Female	Positive histology	Unknown	Liver	8170	Blank(s)	Blank(s)	Blank(s)	Blank(s)	Blank(s)	Blank(s)	Recommended but not performed, unknown reason	Blank(s)	Blank(s)	Blank(s)	9	Blank(s)	Blank(s)	Blank(s)	Blank(s)	Blank(s)	Blank(s)	Blank(s)	Blank(s)	Blank(s)	Complete dates are available and there are more than 0 days of survival	Liver	1250	851	883	1288	861	1250	1179	819	0	1976	Blank(s)	Blank(s)	Blank(s)	Dead
25-29 years	White	Female	Positive histology	Unknown	Liver	8170	Blank(s)	Blank(s)	Blank(s)	Blank(s)	Blank(s)	Blank(s)	Recommended but not performed, unknown reason	Blank(s)	Blank(s)	Blank(s)	9	Blank(s)	Blank(s)	Blank(s)	Blank(s)	Blank(s)	Blank(s)	Blank(s)	Blank(s)	Blank(s)	Incomplete dates are available and there cannot be zero days of follow-up	Liver	1250	851	883	1288	861	1250	1179	819	16	1976	Blank(s)	Blank(s)	Blank(s)	Dead
55-59 years	Other (American Indian/AK Native, Asian/Pacific Islander)	Female	Positive histology	Poorly differentiated; Grade III	Liver	8170	Blank(s)	Blank(s)	Blank(s)	Blank(s)	Blank(s)	Blank(s)	Surgery performed	Blank(s)	Blank(s)	Blank(s)	90	Blank(s)	Blank(s)	Blank(s)	Blank(s)	Blank(s)	Blank(s)	Blank(s)	Blank(s)	Blank(s)	Complete dates are available and there are more than 0 days of survival	Liver	1085	781	766	1065	760	1053	988	715	8	1978	Blank(s)	Blank(s)	Blank(s)	Dead
70-74 years	Other (American Indian/AK Native, Asian/Pacific Islander)	Male	Positive histology	Poorly differentiated; Grade III	Liver	8170	Blank(s)	Blank(s)	Blank(s)	Blank(s)	Blank(s)	Blank(s)	Recommended but not performed, unknown reason	Blank(s)	Blank(s)	Blank(s)	9	Blank(s)	Blank(s)	Blank(s)	Blank(s)	Blank(s)	Blank(s)	Blank(s)	Blank(s)	Blank(s)	Complete dates are available and there are more than 0 days of survival	Liver	1250	851	883	1288	861	1250	1179	819	8	1978	Blank(s)	Blank(s)	Blank(s)	Dead
50-54 years	Black	Male	Positive histology	Unknown	Liver	8170	Blank(s)	Blank(s)	Blank(s)	Blank(s)	Blank(s)	Blank(s)	Recommended but not performed, unknown reason	Blank(s)	Blank(s)	Blank(s)	9	Blank(s)	Blank(s)	Blank(s)	Blank(s)	Blank(s)	Blank(s)	Blank(s)	Blank(s)	Blank(s)	Complete dates are available and there are more than 0 days of survival	Liver	1250	851	883	1288	861	1250	1179	819	0	1978	Blank(s)	Blank(s)	Blank(s)	Dead
70-74 years	White	Female	Positive histology	Unknown	BileDuctsIntraHepat	8180	Blank(s)	Blank(s)	Blank(s)	Blank(s)	Blank(s)	Blank(s)	Recommended but not performed, unknown reason	Blank(s)	Blank(s)	Blank(s)	9	Blank(s)	Blank(s)	Blank(s)	Blank(s)	Blank(s)	Blank(s)	Blank(s)	Blank(s)	Blank(s)	Complete dates are available and there are more than 0 days of survival	Liver	833	495	534	878	444	774	723	419	12	1978	Blank(s)	Blank(s)	Blank(s)	Dead
40-44 years	Unknown	Male	Positive histology	Unknown	Liver	8170	Blank(s)	Blank(s)	Blank(s)	Blank(s)	Blank(s)	Blank(s)	Recommended but not performed, unknown reason	Blank(s)	Blank(s)	Blank(s)	9	Blank(s)	Blank(s)	Blank(s)	Blank(s)	Blank(s)	Blank(s)	Blank(s)	Blank(s)	Blank(s)	Complete dates are available and there are more than 0 days of survival	Liver	1250	851	883	1288	861	1250	1179	819	12	1978	Blank(s)	Blank(s)	Blank(s)	Dead
75-79 years	White	Male	Positive histology	Unknown	Liver	8170	Blank(s)	Blank(s)	Blank(s)	Blank(s)	Blank(s)	Blank(s)	Recommended but not performed, unknown reason	Blank(s)	Blank(s)	Blank(s)	9	Blank(s)	Blank(s)	Blank(s)	Blank(s)	Blank(s)	Blank(s)	Blank(s)	Blank(s)	Blank(s)	Complete dates are available and there are more than 0 days of survival	Liver	1324	776	784	1328	817	1346	1230	761	0	1975	Blank(s)	Blank(s)	Blank(s)	Dead
55-59 years	Black	Male	Positive histology	Unknown	Liver	8170	Blank(s)	Blank(s)	Blank(s)	Blank(s)	Blank(s)	Blank(s)	Not recommended, contraindicated due to other cond; autopsy only (1973-2002)	Blank(s)	Blank(s)	Blank(s)	0	Blank(s)	Blank(s)	Blank(s)	Blank(s)	Blank(s)	Blank(s)	Blank(s)	Blank(s)	Blank(s)	Not calculated because a Death Certificate Only or Autopsy Only case	Liver	1250	851	883	1288	861	1250	1179	819	Unknown	1981	Blank(s)	Blank(s)	Blank(s)	Dead
25-29 years	Other (American Indian/AK Native, Asian/Pacific Islander)	Male	Positive histology	Undifferentiated; anaplastic; Grade IV	Liver	8020	Blank(s)	Blank(s)	Blank(s)	Blank(s)	Blank(s)	Blank(s)	Recommended but not performed, unknown reason	Blank(s)	Blank(s)	Blank(s)	9	Blank(s)	Blank(s)	Blank(s)	Blank(s)	Blank(s)	Blank(s)	Blank(s)	Blank(s)	Blank(s)	Complete dates are available and there are more than 0 days of survival	Liver	1324	776	784	1328	817	1346	1230	761	1	1979	Blank(s)	Blank(s)	Blank(s)	Dead
70-74 years	White	Male	Positive histology	Unknown	Liver	8170	Blank(s)	Blank(s)	Blank(s)	Blank(s)	Blank(s)	Blank(s)	Recommended but not performed, unknown reason	Blank(s)	Blank(s)	Blank(s)	9	Blank(s)	Blank(s)	Blank(s)	Blank(s)	Blank(s)	Blank(s)	Blank(s)	Blank(s)	Blank(s)	Complete dates are available and there are more than 0 days of survival	Stomach	1085	781	766	1065	760	1053	988	715	8	1975	Blank(s)	Blank(s)	Blank(s)	Dead
85+ years	White	Female	Positive histology	Moderately differentiated; Grade II	Liver	8170	Blank(s)	Blank(s)	Blank(s)	Blank(s)	Blank(s)	Blank(s)	Recommended but not performed, unknown reason	Blank(s)	Blank(s)	Blank(s)	9	Blank(s)	Blank(s)	Blank(s)	Blank(s)	Blank(s)	Blank(s)	Blank(s)	Blank(s)	Blank(s)	Complete dates are available and there are more than 0 days of survival	Liver	1250	851	883	1288	861	1250	1179	819	0	1976	Blank(s)	Blank(s)	Blank(s)	Dead
70-74 years	White	Female	Positive histology	Unknown	Liver	8140	Blank(s)	Blank(s)	Blank(s)	Blank(s)	Blank(s)	Blank(s)	Recommended but not performed, unknown reason	Blank(s)	Blank(s)	Blank(s)	9	Blank(s)	Blank(s)	Blank(s)	Blank(s)	Blank(s)	Blank(s)	Blank(s)	Blank(s)	Blank(s)	Complete dates are available and there are more than 0 days of survival	Liver	1250	851	883	1288	861	1250	1179	819	1	1979	Blank(s)	Blank(s)	Blank(s)	Dead
85+ years	Other (American Indian/AK Native, Asian/Pacific Islander)	Male	Positive histology	Undifferentiated; anaplastic; Grade IV	Liver	8020	Blank(s)	Blank(s)	Blank(s)	Blank(s)	Blank(s)	Blank(s)	Recommended but not performed, unknown reason	Blank(s)	Blank(s)	Blank(s)	9	Blank(s)	Blank(s)	Blank(s)	Blank(s)	Blank(s)	Blank(s)	Blank(s)	Blank(s)	Blank(s)	Complete dates are available and there are more than 0 days of survival	Liver	1324	776	784	1328	817	1346	1230	761	1	1980	Blank(s)	Blank(s)	Blank(s)	Dead
40-44 years	Other (American Indian/AK Native, Asian/Pacific Islander)	Male	Positive laboratory test/marker study	Unknown	Liver	8170	IIIB	IIIA	Blank(s)	0	None	None; diagnosed at autopsy	Not recommended	Blank(s)	Blank(s)	Blank(s)	Blank(s)	Blank(s)	0	20	630	0	0	0	10	1	Complete dates are available and there are more than 0 days of survival	Stomach and Duodenal Ulcers	1324	776	784	1328	817	1346	1230	761	2	2012	T3b	N0	M0	Dead
60-64 years	White	Male	Positive histology	Unknown	Liver	8170	Blank(s)	Blank(s)	Blank(s)	Blank(s)	Blank(s)	Blank(s)	Recommended but not performed, unknown reason	Blank(s)	Blank(s)	Blank(s)	9	Blank(s)	Blank(s)	Blank(s)	Blank(s)	Blank(s)	Blank(s)	Blank(s)	Blank(s)	Blank(s)	Complete dates are available and there are more than 0 days of survival	Liver	1250	851	883	1288	861	1250	1179	819	1	1978	Blank(s)	Blank(s)	Blank(s)	Dead
05-09 years	Black	Female	Positive histology	Unknown	Liver	8990	Blank(s)	Blank(s)	Blank(s)	Blank(s)	Blank(s)	Blank(s)	Surgery performed	Blank(s)	Blank(s)	Blank(s)	90	Blank(s)	Blank(s)	Blank(s)	Blank(s)	Blank(s)	Blank(s)	Blank(s)	Blank(s)	Blank(s)	Complete dates are available and there are more than 0 days of survival	Alive	1085	781	766	1065	760	1053	988	715	131	1978	Blank(s)	Blank(s)	Blank(s)	Alive
60-64 years	Other (American Indian/AK Native, Asian/Pacific Islander)	Male	Positive histology	Unknown	Liver	8170	Blank(s)	Blank(s)	Blank(s)	Blank(s)	Blank(s)	Blank(s)	Recommended but not performed, unknown reason	Blank(s)	Blank(s)	Blank(s)	9	Blank(s)	Blank(s)	Blank(s)	Blank(s)	Blank(s)	Blank(s)	Blank(s)	Blank(s)	Blank(s)	Complete dates are available and there are more than 0 days of survival	Liver	1324	776	784	1328	817	1346	1230	761	0	1981	Blank(s)	Blank(s)	Blank(s)	Dead
70-74 years	Black	Female	Positive histology	Unknown	Liver	8240	Blank(s)	Blank(s)	88	Blank(s)	Blank(s)	Blank(s)	Surgery performed	Blank(s)	Blank(s)	Blank(s)	90	Blank(s)	99	Blank(s)	Blank(s)	Blank(s)	Blank(s)	Blank(s)	Blank(s)	Blank(s)	Incomplete dates are available and there cannot be zero days of follow-up	Miscellaneous Malignant Cancer	797	484	467	759	477	760	695	453	54	1995	Blank(s)	Blank(s)	Blank(s)	Dead
70-74 years	White	Female	Positive histology	Unknown	Liver	8170	Blank(s)	Blank(s)	Blank(s)	Blank(s)	Blank(s)	Blank(s)	Not recommended, contraindicated due to other cond; autopsy only (1973-2002)	Blank(s)	Blank(s)	Blank(s)	0	Blank(s)	Blank(s)	Blank(s)	Blank(s)	Blank(s)	Blank(s)	Blank(s)	Blank(s)	Blank(s)	Not calculated because a Death Certificate Only or Autopsy Only case	Chronic Liver Disease and Cirrhosis	1085	781	766	1065	760	1053	988	715	Unknown	1978	Blank(s)	Blank(s)	Blank(s)	Dead
40-44 years	White	Female	Positive histology	Unknown	Liver	8170	Blank(s)	Blank(s)	Blank(s)	Blank(s)	Blank(s)	Blank(s)	Recommended but not performed, unknown reason	Blank(s)	Blank(s)	Blank(s)	9	Blank(s)	Blank(s)	Blank(s)	Blank(s)	Blank(s)	Blank(s)	Blank(s)	Blank(s)	Blank(s)	Complete dates are available and there are more than 0 days of survival	Miscellaneous Malignant Cancer	1324	776	784	1328	817	1346	1230	761	4	1975	Blank(s)	Blank(s)	Blank(s)	Dead
40-44 years	Other (American Indian/AK Native, Asian/Pacific Islander)	Male	Positive histology	Unknown	Liver	8170	Blank(s)	Blank(s)	Blank(s)	Blank(s)	Blank(s)	Blank(s)	Recommended but not performed, unknown reason	Blank(s)	Blank(s)	Blank(s)	9	Blank(s)	Blank(s)	Blank(s)	Blank(s)	Blank(s)	Blank(s)	Blank(s)	Blank(s)	Blank(s)	Complete dates are available and there are more than 0 days of survival	Liver	1324	776	784	1328	817	1346	1230	761	10	1978	Blank(s)	Blank(s)	Blank(s)	Dead
75-79 years	White	Female	Positive exfoliative cytology, no positive histology	Unknown	Liver	8170	Blank(s)	Blank(s)	88	0	Blank(s)	Blank(s)	Not recommended	0	0	0	Blank(s)	Blank(s)	0	Blank(s)	Blank(s)	Blank(s)	Blank(s)	Blank(s)	Blank(s)	Blank(s)	Complete dates are available and there are more than 0 days of survival	Breast	797	484	467	759	477	760	695	453	8	2000	Blank(s)	Blank(s)	Blank(s)	Dead
60-64 years	White	Female	Positive histology	Unknown	Liver	8140	Blank(s)	Blank(s)	Blank(s)	Blank(s)	Blank(s)	Blank(s)	Surgery performed	Blank(s)	Blank(s)	Blank(s)	90	Blank(s)	Blank(s)	Blank(s)	Blank(s)	Blank(s)	Blank(s)	Blank(s)	Blank(s)	Blank(s)	Complete dates are available and there are more than 0 days of survival	Alive	797	484	467	759	477	760	695	453	258	1979	Blank(s)	Blank(s)	Blank(s)	Alive
65-69 years	Other (American Indian/AK Native, Asian/Pacific Islander)	Male	Radiography without microscopic confirm	Unknown	Liver	8170	Blank(s)	Blank(s)	Blank(s)	Blank(s)	Blank(s)	Blank(s)	Recommended but not performed, unknown reason	Blank(s)	Blank(s)	Blank(s)	9	Blank(s)	Blank(s)	Blank(s)	Blank(s)	Blank(s)	Blank(s)	Blank(s)	Blank(s)	Blank(s)	Complete dates are available and there are more than 0 days of survival	Liver	1324	776	784	1328	817	1346	1230	761	8	1978	Blank(s)	Blank(s)	Blank(s)	Dead
75-79 years	White	Female	Radiography without microscopic confirm	Unknown	Liver	8170	Blank(s)	Blank(s)	Blank(s)	Blank(s)	Blank(s)	Blank(s)	Recommended but not performed, unknown reason	Blank(s)	Blank(s)	Blank(s)	9	Blank(s)	Blank(s)	Blank(s)	Blank(s)	Blank(s)	Blank(s)	Blank(s)	Blank(s)	Blank(s)	Complete dates are available and there are more than 0 days of survival	Liver	833	495	534	878	444	774	723	419	0	1980	Blank(s)	Blank(s)	Blank(s)	Dead
45-49 years	Other (American Indian/AK Native, Asian/Pacific Islander)	Male	Positive histology	Unknown	Liver	8170	Blank(s)	Blank(s)	Blank(s)	Blank(s)	Blank(s)	Blank(s)	Recommended but not performed, unknown reason	Blank(s)	Blank(s)	Blank(s)	9	Blank(s)	Blank(s)	Blank(s)	Blank(s)	Blank(s)	Blank(s)	Blank(s)	Blank(s)	Blank(s)	Complete dates are available and there are more than 0 days of survival	Liver	1324	776	784	1328	817	1346	1230	761	1	1978	Blank(s)	Blank(s)	Blank(s)	Dead
50-54 years	Other (American Indian/AK Native, Asian/Pacific Islander)	Male	Positive histology	Unknown	Liver	8170	Blank(s)	Blank(s)	Blank(s)	Blank(s)	Blank(s)	Blank(s)	Not recommended, contraindicated due to other cond; autopsy only (1973-2002)	Blank(s)	Blank(s)	Blank(s)	0	Blank(s)	Blank(s)	Blank(s)	Blank(s)	Blank(s)	Blank(s)	Blank(s)	Blank(s)	Blank(s)	Not calculated because a Death Certificate Only or Autopsy Only case	Chronic Liver Disease and Cirrhosis	1324	776	784	1328	817	1346	1230	761	Unknown	1978	Blank(s)	Blank(s)	Blank(s)	Dead
85+ years	White	Female	Radiography without microscopic confirm	Unknown	Liver	8010	Blank(s)	Blank(s)	Blank(s)	Blank(s)	Blank(s)	Blank(s)	Recommended but not performed, unknown reason	Blank(s)	Blank(s)	Blank(s)	9	Blank(s)	Blank(s)	Blank(s)	Blank(s)	Blank(s)	Blank(s)	Blank(s)	Blank(s)	Blank(s)	Complete dates are available and there are more than 0 days of survival	Liver	833	495	534	878	444	774	723	419	2	1980	Blank(s)	Blank(s)	Blank(s)	Dead
65-69 years	Black	Female	Positive histology	Unknown	Liver	8170	Blank(s)	Blank(s)	Blank(s)	Blank(s)	Blank(s)	Blank(s)	Recommended but not performed, unknown reason	Blank(s)	Blank(s)	Blank(s)	9	Blank(s)	Blank(s)	Blank(s)	Blank(s)	Blank(s)	Blank(s)	Blank(s)	Blank(s)	Blank(s)	Complete dates are available and there are more than 0 days of survival	Chronic Liver Disease and Cirrhosis	797	484	467	759	477	760	695	453	0	1975	Blank(s)	Blank(s)	Blank(s)	Dead
50-54 years	Other (American Indian/AK Native, Asian/Pacific Islander)	Male	Positive histology	Unknown	Liver	8170	Blank(s)	Blank(s)	Blank(s)	Blank(s)	Blank(s)	Blank(s)	Surgery performed	Blank(s)	Blank(s)	Blank(s)	90	Blank(s)	Blank(s)	Blank(s)	Blank(s)	Blank(s)	Blank(s)	Blank(s)	Blank(s)	Blank(s)	Complete dates are available and there are more than 0 days of survival	Liver	797	484	467	759	477	760	695	453	0	1975	Blank(s)	Blank(s)	Blank(s)	Dead
65-69 years	White	Female	Radiography without microscopic confirm	Unknown	Liver	8010	Blank(s)	Blank(s)	Blank(s)	Blank(s)	Blank(s)	Blank(s)	Recommended but not performed, unknown reason	Blank(s)	Blank(s)	Blank(s)	9	Blank(s)	Blank(s)	Blank(s)	Blank(s)	Blank(s)	Blank(s)	Blank(s)	Blank(s)	Blank(s)	Complete dates are available and there are more than 0 days of survival	Liver	797	484	467	759	477	760	695	453	2	1976	Blank(s)	Blank(s)	Blank(s)	Dead
65-69 years	White	Male	Positive histology	Unknown	Liver	8170	Blank(s)	Blank(s)	Blank(s)	Blank(s)	Blank(s)	Blank(s)	Recommended but not performed, unknown reason	Blank(s)	Blank(s)	Blank(s)	9	Blank(s)	Blank(s)	Blank(s)	Blank(s)	Blank(s)	Blank(s)	Blank(s)	Blank(s)	Blank(s)	Complete dates are available and there are more than 0 days of survival	Liver	1250	851	883	1288	861	1250	1179	819	2	1980	Blank(s)	Blank(s)	Blank(s)	Dead
40-44 years	White	Female	Positive histology	Well differentiated; Grade I	Liver	8170	Blank(s)	Blank(s)	Blank(s)	Blank(s)	Blank(s)	Blank(s)	Surgery performed	Blank(s)	Blank(s)	Blank(s)	90	Blank(s)	Blank(s)	Blank(s)	Blank(s)	Blank(s)	Blank(s)	Blank(s)	Blank(s)	Blank(s)	Complete dates are available and there are more than 0 days of survival	Other Cause of Death	797	484	467	759	477	760	695	453	2	1979	Blank(s)	Blank(s)	Blank(s)	Dead
65-69 years	White	Male	Positive histology	Unknown	Liver	8170	Blank(s)	Blank(s)	Blank(s)	Blank(s)	Blank(s)	Blank(s)	Recommended but not performed, unknown reason	Blank(s)	Blank(s)	Blank(s)	9	Blank(s)	Blank(s)	Blank(s)	Blank(s)	Blank(s)	Blank(s)	Blank(s)	Blank(s)	Blank(s)	Complete dates are available and there are more than 0 days of survival	Liver	1085	781	766	1065	760	1053	988	715	11	1976	Blank(s)	Blank(s)	Blank(s)	Dead
45-49 years	White	Male	Positive histology	Unknown	BileDuctsIntraHepat	8180	Blank(s)	Blank(s)	Blank(s)	Blank(s)	Blank(s)	Blank(s)	Recommended but not performed, unknown reason	Blank(s)	Blank(s)	Blank(s)	9	Blank(s)	Blank(s)	Blank(s)	Blank(s)	Blank(s)	Blank(s)	Blank(s)	Blank(s)	Blank(s)	Complete dates are available and there are more than 0 days of survival	Miscellaneous Malignant Cancer	1250	851	883	1288	861	1250	1179	819	1	1980	Blank(s)	Blank(s)	Blank(s)	Dead
55-59 years	Other (American Indian/AK Native, Asian/Pacific Islander)	Male	Positive histology	Unknown	Liver	8170	Blank(s)	Blank(s)	Blank(s)	Blank(s)	Blank(s)	Blank(s)	Recommended but not performed, unknown reason	Blank(s)	Blank(s)	Blank(s)	9	Blank(s)	Blank(s)	Blank(s)	Blank(s)	Blank(s)	Blank(s)	Blank(s)	Blank(s)	Blank(s)	Complete dates are available and there are more than 0 days of survival	Liver	1324	776	784	1328	817	1346	1230	761	12	1976	Blank(s)	Blank(s)	Blank(s)	Dead
55-59 years	Other (American Indian/AK Native, Asian/Pacific Islander)	Male	Positive histology	Poorly differentiated; Grade III	Liver	8170	Blank(s)	Blank(s)	Blank(s)	Blank(s)	Blank(s)	Blank(s)	Recommended but not performed, unknown reason	Blank(s)	Blank(s)	Blank(s)	9	Blank(s)	Blank(s)	Blank(s)	Blank(s)	Blank(s)	Blank(s)	Blank(s)	Blank(s)	Blank(s)	Incomplete dates are available and there cannot be zero days of follow-up	Other Biliary	1324	776	784	1328	817	1346	1230	761	1	1976	Blank(s)	Blank(s)	Blank(s)	Dead
55-59 years	White	Male	Positive histology	Unknown	Liver	8010	Blank(s)	Blank(s)	Blank(s)	Blank(s)	Blank(s)	Blank(s)	Recommended but not performed, unknown reason	Blank(s)	Blank(s)	Blank(s)	9	Blank(s)	Blank(s)	Blank(s)	Blank(s)	Blank(s)	Blank(s)	Blank(s)	Blank(s)	Blank(s)	Complete dates are available and there are more than 0 days of survival	Liver	1085	781	766	1065	760	1053	988	715	3	1977	Blank(s)	Blank(s)	Blank(s)	Dead
70-74 years	White	Female	Positive histology	Unknown	Liver	8170	Blank(s)	Blank(s)	Blank(s)	Blank(s)	Blank(s)	Blank(s)	Surgery performed	Blank(s)	Blank(s)	Blank(s)	90	Blank(s)	Blank(s)	Blank(s)	Blank(s)	Blank(s)	Blank(s)	Blank(s)	Blank(s)	Blank(s)	Complete dates are available and there are more than 0 days of survival	Miscellaneous Malignant Cancer	1085	781	766	1065	760	1053	988	715	37	1977	Blank(s)	Blank(s)	Blank(s)	Dead
85+ years	White	Female	Positive laboratory test/marker study	Unknown	Liver	8170	I	I	Blank(s)	0	None	None; diagnosed at autopsy	Not recommended	Blank(s)	Blank(s)	Blank(s)	Blank(s)	Blank(s)	0	60	100	0	0	0	10	1	Complete dates are available and there are more than 0 days of survival	Liver	1324	776	784	1328	817	1346	1230	761	13	2011	T1	N0	M0	Dead
70-74 years	White	Male	Radiography without microscopic confirm	Unknown	Liver	8170	Blank(s)	Blank(s)	Blank(s)	Blank(s)	Blank(s)	Blank(s)	Recommended but not performed, unknown reason	Blank(s)	Blank(s)	Blank(s)	9	Blank(s)	Blank(s)	Blank(s)	Blank(s)	Blank(s)	Blank(s)	Blank(s)	Blank(s)	Blank(s)	Complete dates are available and there are more than 0 days of survival	Miscellaneous Malignant Cancer	1250	851	883	1288	861	1250	1179	819	0	1980	Blank(s)	Blank(s)	Blank(s)	Dead
50-54 years	Other (American Indian/AK Native, Asian/Pacific Islander)	Male	Positive histology	Unknown	Liver	8170	Blank(s)	Blank(s)	Blank(s)	Blank(s)	Blank(s)	Blank(s)	Recommended but not performed, unknown reason	Blank(s)	Blank(s)	Blank(s)	9	Blank(s)	Blank(s)	Blank(s)	Blank(s)	Blank(s)	Blank(s)	Blank(s)	Blank(s)	Blank(s)	Complete dates are available and there are more than 0 days of survival	Liver	1324	776	784	1328	817	1346	1230	761	0	1981	Blank(s)	Blank(s)	Blank(s)	Dead
75-79 years	White	Male	Positive histology	Unknown	Liver	8140	Blank(s)	Blank(s)	Blank(s)	Blank(s)	Blank(s)	Blank(s)	Recommended but not performed, unknown reason	Blank(s)	Blank(s)	Blank(s)	9	Blank(s)	Blank(s)	Blank(s)	Blank(s)	Blank(s)	Blank(s)	Blank(s)	Blank(s)	Blank(s)	Complete dates are available and there are more than 0 days of survival	Liver	1250	851	883	1288	861	1250	1179	819	1	1979	Blank(s)	Blank(s)	Blank(s)	Dead
70-74 years	Other (American Indian/AK Native, Asian/Pacific Islander)	Male	Positive histology	Unknown	Liver	8170	Blank(s)	Blank(s)	Blank(s)	Blank(s)	Blank(s)	Blank(s)	Surgery performed	Blank(s)	Blank(s)	Blank(s)	90	Blank(s)	Blank(s)	Blank(s)	Blank(s)	Blank(s)	Blank(s)	Blank(s)	Blank(s)	Blank(s)	Complete dates are available and there are more than 0 days of survival	Liver	1324	776	784	1328	817	1346	1230	761	3	1979	Blank(s)	Blank(s)	Blank(s)	Dead
55-59 years	White	Male	Positive histology	Moderately differentiated; Grade II	Liver	8170	IIIA	IIIA	Blank(s)	36	1 to 3 regional lymph nodes removed	None; diagnosed at autopsy	Surgery performed	Blank(s)	Blank(s)	Blank(s)	Blank(s)	Blank(s)	3	90	400	0	0	0	10	1	Complete dates are available and there are more than 0 days of survival	Liver	1324	776	784	1328	817	1346	1230	761	28	2013	T3a	N0	M0	Dead
75-79 years	White	Male	Radiography without microscopic confirm	Unknown	Liver	8170	Blank(s)	Blank(s)	Blank(s)	Blank(s)	Blank(s)	Blank(s)	Recommended but not performed, unknown reason	Blank(s)	Blank(s)	Blank(s)	9	Blank(s)	Blank(s)	Blank(s)	Blank(s)	Blank(s)	Blank(s)	Blank(s)	Blank(s)	Blank(s)	Complete dates are available and there are more than 0 days of survival	Liver	1324	776	784	1328	817	1346	1230	761	0	1976	Blank(s)	Blank(s)	Blank(s)	Dead
60-64 years	White	Female	Positive histology	Unknown	Liver	8170	Blank(s)	I	Blank(s)	61	None	None; diagnosed at autopsy	Surgery performed	Blank(s)	Blank(s)	Blank(s)	Blank(s)	Blank(s)	0	56	100	0	0	0	10	1	Complete dates are available and there are more than 0 days of survival	Diseases of Heart	1085	781	766	1065	760	1053	988	715	144	2004	Blank(s)	Blank(s)	Blank(s)	Dead
75-79 years	White	Male	Positive histology	Unknown	Liver	8170	Blank(s)	Blank(s)	Blank(s)	Blank(s)	Blank(s)	Blank(s)	Not recommended, contraindicated due to other cond; autopsy only (1973-2002)	Blank(s)	Blank(s)	Blank(s)	0	Blank(s)	Blank(s)	Blank(s)	Blank(s)	Blank(s)	Blank(s)	Blank(s)	Blank(s)	Blank(s)	Not calculated because a Death Certificate Only or Autopsy Only case	Chronic Liver Disease and Cirrhosis	1324	776	784	1328	817	1346	1230	761	Unknown	1977	Blank(s)	Blank(s)	Blank(s)	Dead
60-64 years	White	Male	Positive histology	Poorly differentiated; Grade III	Liver	8170	Blank(s)	Blank(s)	Blank(s)	Blank(s)	Blank(s)	Blank(s)	Recommended but not performed, unknown reason	Blank(s)	Blank(s)	Blank(s)	9	Blank(s)	Blank(s)	Blank(s)	Blank(s)	Blank(s)	Blank(s)	Blank(s)	Blank(s)	Blank(s)	Complete dates are available and there are more than 0 days of survival	Liver	797	484	467	759	477	760	695	453	0	1975	Blank(s)	Blank(s)	Blank(s)	Dead
50-54 years	White	Male	Positive histology	Unknown	Liver	8170	Blank(s)	Blank(s)	Blank(s)	Blank(s)	Blank(s)	Blank(s)	Recommended but not performed, unknown reason	Blank(s)	Blank(s)	Blank(s)	9	Blank(s)	Blank(s)	Blank(s)	Blank(s)	Blank(s)	Blank(s)	Blank(s)	Blank(s)	Blank(s)	Complete dates are available and there are more than 0 days of survival	Other Cause of Death	1085	781	766	1065	760	1053	988	715	0	1978	Blank(s)	Blank(s)	Blank(s)	Dead
85+ years	White	Male	Clinical diagnosis only	Unknown	Liver	8170	Blank(s)	UNK Stage	Blank(s)	0	None	None; diagnosed at autopsy	Not recommended	Blank(s)	Blank(s)	Blank(s)	Blank(s)	Blank(s)	0	68	390	999	99	9	10	1	Complete dates are available and there are more than 0 days of survival	Liver	797	484	467	759	477	760	695	453	1	2007	Blank(s)	Blank(s)	Blank(s)	Dead
75-79 years	White	Male	Positive histology	Unknown	Liver	8170	Blank(s)	Blank(s)	Blank(s)	Blank(s)	Blank(s)	Blank(s)	Recommended but not performed, unknown reason	Blank(s)	Blank(s)	Blank(s)	9	Blank(s)	Blank(s)	Blank(s)	Blank(s)	Blank(s)	Blank(s)	Blank(s)	Blank(s)	Blank(s)	Complete dates are available and there are more than 0 days of survival	Miscellaneous Malignant Cancer	797	484	467	759	477	760	695	453	0	1980	Blank(s)	Blank(s)	Blank(s)	Dead
60-64 years	White	Male	Positive histology	Poorly differentiated; Grade III	Liver	8170	Blank(s)	Blank(s)	Blank(s)	Blank(s)	Blank(s)	Blank(s)	Not recommended, contraindicated due to other cond; autopsy only (1973-2002)	Blank(s)	Blank(s)	Blank(s)	0	Blank(s)	Blank(s)	Blank(s)	Blank(s)	Blank(s)	Blank(s)	Blank(s)	Blank(s)	Blank(s)	Not calculated because a Death Certificate Only or Autopsy Only case	Liver	1324	776	784	1328	817	1346	1230	761	Unknown	1976	Blank(s)	Blank(s)	Blank(s)	Dead
30-34 years	White	Female	Positive histology	Unknown	Liver	8170	Blank(s)	Blank(s)	Blank(s)	Blank(s)	Blank(s)	Blank(s)	Recommended but not performed, unknown reason	Blank(s)	Blank(s)	Blank(s)	9	Blank(s)	Blank(s)	Blank(s)	Blank(s)	Blank(s)	Blank(s)	Blank(s)	Blank(s)	Blank(s)	Complete dates are available and there are more than 0 days of survival	Liver	797	484	467	759	477	760	695	453	15	1975	Blank(s)	Blank(s)	Blank(s)	Dead
75-79 years	White	Female	Positive histology	Unknown	Liver	9120	Blank(s)	Blank(s)	Blank(s)	Blank(s)	Blank(s)	Blank(s)	Surgery performed	Blank(s)	Blank(s)	Blank(s)	90	Blank(s)	Blank(s)	Blank(s)	Blank(s)	Blank(s)	Blank(s)	Blank(s)	Blank(s)	Blank(s)	Complete dates are available and there are more than 0 days of survival	Miscellaneous Malignant Cancer	797	484	467	759	477	760	695	453	1	1979	Blank(s)	Blank(s)	Blank(s)	Dead
75-79 years	Other (American Indian/AK Native, Asian/Pacific Islander)	Female	Positive histology	Unknown	Liver	8170	Blank(s)	Blank(s)	Blank(s)	Blank(s)	Blank(s)	Blank(s)	Recommended but not performed, unknown reason	Blank(s)	Blank(s)	Blank(s)	9	Blank(s)	Blank(s)	Blank(s)	Blank(s)	Blank(s)	Blank(s)	Blank(s)	Blank(s)	Blank(s)	Complete dates are available and there are more than 0 days of survival	Liver	1324	776	784	1328	817	1346	1230	761	0	1980	Blank(s)	Blank(s)	Blank(s)	Dead
60-64 years	Black	Male	Radiography without microscopic confirm	Unknown	Liver	8170	Blank(s)	Blank(s)	Blank(s)	Blank(s)	Blank(s)	Blank(s)	Recommended but not performed, unknown reason	Blank(s)	Blank(s)	Blank(s)	9	Blank(s)	Blank(s)	Blank(s)	Blank(s)	Blank(s)	Blank(s)	Blank(s)	Blank(s)	Blank(s)	Complete dates are available and there are more than 0 days of survival	Liver	1250	851	883	1288	861	1250	1179	819	0	1978	Blank(s)	Blank(s)	Blank(s)	Dead
65-69 years	White	Male	Positive histology	Unknown	Liver	8170	Blank(s)	Blank(s)	Blank(s)	Blank(s)	Blank(s)	Blank(s)	Recommended but not performed, unknown reason	Blank(s)	Blank(s)	Blank(s)	9	Blank(s)	Blank(s)	Blank(s)	Blank(s)	Blank(s)	Blank(s)	Blank(s)	Blank(s)	Blank(s)	Complete dates are available and there are more than 0 days of survival	Liver	1324	776	784	1328	817	1346	1230	761	0	1978	Blank(s)	Blank(s)	Blank(s)	Dead
65-69 years	Black	Male	Positive histology	Unknown	Liver	8170	Blank(s)	Blank(s)	Blank(s)	Blank(s)	Blank(s)	Blank(s)	Recommended but not performed, unknown reason	Blank(s)	Blank(s)	Blank(s)	9	Blank(s)	Blank(s)	Blank(s)	Blank(s)	Blank(s)	Blank(s)	Blank(s)	Blank(s)	Blank(s)	Complete dates are available and there are more than 0 days of survival	Liver	1324	776	784	1328	817	1346	1230	761	0	1977	Blank(s)	Blank(s)	Blank(s)	Dead
70-74 years	White	Male	Positive histology	Unknown	Liver	8170	Blank(s)	Blank(s)	Blank(s)	Blank(s)	Blank(s)	Blank(s)	Recommended but not performed, unknown reason	Blank(s)	Blank(s)	Blank(s)	9	Blank(s)	Blank(s)	Blank(s)	Blank(s)	Blank(s)	Blank(s)	Blank(s)	Blank(s)	Blank(s)	Complete dates are available and there are more than 0 days of survival	Liver	797	484	467	759	477	760	695	453	0	1975	Blank(s)	Blank(s)	Blank(s)	Dead
60-64 years	Other (American Indian/AK Native, Asian/Pacific Islander)	Male	Positive histology	Unknown	Liver	8170	Blank(s)	Blank(s)	Blank(s)	Blank(s)	Blank(s)	Blank(s)	Recommended but not performed, unknown reason	Blank(s)	Blank(s)	Blank(s)	9	Blank(s)	Blank(s)	Blank(s)	Blank(s)	Blank(s)	Blank(s)	Blank(s)	Blank(s)	Blank(s)	Complete dates are available and there are more than 0 days of survival	Chronic Liver Disease and Cirrhosis	797	484	467	759	477	760	695	453	2	1980	Blank(s)	Blank(s)	Blank(s)	Dead
75-79 years	White	Male	Positive histology	Unknown	Liver	8170	Blank(s)	Blank(s)	Blank(s)	Blank(s)	Blank(s)	Blank(s)	Recommended but not performed, unknown reason	Blank(s)	Blank(s)	Blank(s)	9	Blank(s)	Blank(s)	Blank(s)	Blank(s)	Blank(s)	Blank(s)	Blank(s)	Blank(s)	Blank(s)	Complete dates are available and there are more than 0 days of survival	Liver	797	484	467	759	477	760	695	453	0	1976	Blank(s)	Blank(s)	Blank(s)	Dead
55-59 years	White	Male	Radiography without microscopic confirm	Poorly differentiated; Grade III	Liver	8170	Blank(s)	Blank(s)	Blank(s)	Blank(s)	Blank(s)	Blank(s)	Recommended but not performed, unknown reason	Blank(s)	Blank(s)	Blank(s)	9	Blank(s)	Blank(s)	Blank(s)	Blank(s)	Blank(s)	Blank(s)	Blank(s)	Blank(s)	Blank(s)	Complete dates are available and there are more than 0 days of survival	Liver	1324	776	784	1328	817	1346	1230	761	13	1975	Blank(s)	Blank(s)	Blank(s)	Dead
60-64 years	Other (American Indian/AK Native, Asian/Pacific Islander)	Male	Unknown	Unknown	Liver	8170	Blank(s)	Blank(s)	Blank(s)	Blank(s)	Blank(s)	Blank(s)	Unknown; death certificate; or autopsy only (2003+)	Blank(s)	Blank(s)	Blank(s)	9	Blank(s)	Blank(s)	Blank(s)	Blank(s)	Blank(s)	Blank(s)	Blank(s)	Blank(s)	Blank(s)	Not calculated because a Death Certificate Only or Autopsy Only case	Liver	1250	851	883	1288	861	1250	1179	819	Unknown	1976	Blank(s)	Blank(s)	Blank(s)	Dead
55-59 years	White	Female	Positive histology	Unknown	Liver	8170	Blank(s)	Blank(s)	Blank(s)	Blank(s)	Blank(s)	Blank(s)	Recommended but not performed, unknown reason	Blank(s)	Blank(s)	Blank(s)	9	Blank(s)	Blank(s)	Blank(s)	Blank(s)	Blank(s)	Blank(s)	Blank(s)	Blank(s)	Blank(s)	Complete dates are available and there are more than 0 days of survival	Other Biliary	1324	776	784	1328	817	1346	1230	761	0	1975	Blank(s)	Blank(s)	Blank(s)	Dead
55-59 years	Black	Male	Positive histology	Poorly differentiated; Grade III	Liver	8140	Blank(s)	Blank(s)	Blank(s)	Blank(s)	Blank(s)	Blank(s)	Recommended but not performed, unknown reason	Blank(s)	Blank(s)	Blank(s)	9	Blank(s)	Blank(s)	Blank(s)	Blank(s)	Blank(s)	Blank(s)	Blank(s)	Blank(s)	Blank(s)	Complete dates are available and there are more than 0 days of survival	Miscellaneous Malignant Cancer	1085	781	766	1065	760	1053	988	715	2	1978	Blank(s)	Blank(s)	Blank(s)	Dead
60-64 years	White	Male	Positive histology	Unknown	Liver	8170	Blank(s)	Blank(s)	Blank(s)	Blank(s)	Blank(s)	Blank(s)	Recommended but not performed, unknown reason	Blank(s)	Blank(s)	Blank(s)	9	Blank(s)	Blank(s)	Blank(s)	Blank(s)	Blank(s)	Blank(s)	Blank(s)	Blank(s)	Blank(s)	Complete dates are available and there are more than 0 days of survival	Liver	797	484	467	759	477	760	695	453	2	1983	Blank(s)	Blank(s)	Blank(s)	Dead
45-49 years	Other (American Indian/AK Native, Asian/Pacific Islander)	Male	Positive histology	Unknown	Liver	8170	Blank(s)	Blank(s)	Blank(s)	Blank(s)	Blank(s)	Blank(s)	Recommended but not performed, unknown reason	Blank(s)	Blank(s)	Blank(s)	9	Blank(s)	Blank(s)	Blank(s)	Blank(s)	Blank(s)	Blank(s)	Blank(s)	Blank(s)	Blank(s)	Complete dates are available and there are more than 0 days of survival	Alive	1324	776	784	1328	817	1346	1230	761	135	1976	Blank(s)	Blank(s)	Blank(s)	Alive
50-54 years	Other (American Indian/AK Native, Asian/Pacific Islander)	Male	Positive histology	Unknown	Liver	8170	Blank(s)	Blank(s)	Blank(s)	Blank(s)	Blank(s)	Blank(s)	Recommended but not performed, unknown reason	Blank(s)	Blank(s)	Blank(s)	9	Blank(s)	Blank(s)	Blank(s)	Blank(s)	Blank(s)	Blank(s)	Blank(s)	Blank(s)	Blank(s)	Incomplete dates are available and there could be zero days of follow-up	Liver	1324	776	784	1328	817	1346	1230	761	0	1976	Blank(s)	Blank(s)	Blank(s)	Dead
60-64 years	Other (American Indian/AK Native, Asian/Pacific Islander)	Female	Positive histology	Unknown	Liver	8170	Blank(s)	Blank(s)	88	Blank(s)	Blank(s)	Blank(s)	Not recommended	Blank(s)	Blank(s)	Blank(s)	0	Blank(s)	0	Blank(s)	Blank(s)	Blank(s)	Blank(s)	Blank(s)	Blank(s)	Blank(s)	Complete dates are available and there are more than 0 days of survival	Liver	1324	776	784	1328	817	1346	1230	761	1	1990	Blank(s)	Blank(s)	Blank(s)	Dead
70-74 years	White	Male	Positive histology	Unknown	Liver	8170	Blank(s)	Blank(s)	Blank(s)	Blank(s)	Blank(s)	Blank(s)	Recommended but not performed, unknown reason	Blank(s)	Blank(s)	Blank(s)	9	Blank(s)	Blank(s)	Blank(s)	Blank(s)	Blank(s)	Blank(s)	Blank(s)	Blank(s)	Blank(s)	Complete dates are available and there are more than 0 days of survival	Larynx	1085	781	766	1065	760	1053	988	715	0	1978	Blank(s)	Blank(s)	Blank(s)	Dead
50-54 years	White	Female	Unknown	Unknown	Liver	8010	Blank(s)	Blank(s)	Blank(s)	Blank(s)	Blank(s)	Blank(s)	Unknown; death certificate; or autopsy only (2003+)	Blank(s)	Blank(s)	Blank(s)	9	Blank(s)	Blank(s)	Blank(s)	Blank(s)	Blank(s)	Blank(s)	Blank(s)	Blank(s)	Blank(s)	Not calculated because a Death Certificate Only or Autopsy Only case	Other Cause of Death	1324	776	784	1328	817	1346	1230	761	Unknown	1976	Blank(s)	Blank(s)	Blank(s)	Dead
65-69 years	Other (American Indian/AK Native, Asian/Pacific Islander)	Male	Positive histology	Undifferentiated; anaplastic; Grade IV	Liver	8170	Blank(s)	Blank(s)	Blank(s)	Blank(s)	Blank(s)	Blank(s)	Recommended but not performed, unknown reason	Blank(s)	Blank(s)	Blank(s)	9	Blank(s)	Blank(s)	Blank(s)	Blank(s)	Blank(s)	Blank(s)	Blank(s)	Blank(s)	Blank(s)	Complete dates are available and there are more than 0 days of survival	Cerebrovascular Diseases	1324	776	784	1328	817	1346	1230	761	0	1975	Blank(s)	Blank(s)	Blank(s)	Dead
60-64 years	White	Male	Positive histology	Unknown	Liver	8170	Blank(s)	Blank(s)	Blank(s)	Blank(s)	Blank(s)	Blank(s)	Recommended but not performed, unknown reason	Blank(s)	Blank(s)	Blank(s)	9	Blank(s)	Blank(s)	Blank(s)	Blank(s)	Blank(s)	Blank(s)	Blank(s)	Blank(s)	Blank(s)	Complete dates are available and there are more than 0 days of survival	Liver	1085	781	766	1065	760	1053	988	715	3	1981	Blank(s)	Blank(s)	Blank(s)	Dead
75-79 years	White	Male	Positive histology	Unknown	Liver	8500	Blank(s)	Blank(s)	Blank(s)	Blank(s)	Blank(s)	Blank(s)	Recommended but not performed, unknown reason	Blank(s)	Blank(s)	Blank(s)	9	Blank(s)	Blank(s)	Blank(s)	Blank(s)	Blank(s)	Blank(s)	Blank(s)	Blank(s)	Blank(s)	Complete dates are available and there are more than 0 days of survival	Intrahepatic Bile Duct	1324	776	784	1328	817	1346	1230	761	6	1981	Blank(s)	Blank(s)	Blank(s)	Dead
60-64 years	White	Male	Positive histology	Unknown	Liver	8170	Blank(s)	Blank(s)	Blank(s)	Blank(s)	Blank(s)	Blank(s)	Recommended but not performed, unknown reason	Blank(s)	Blank(s)	Blank(s)	9	Blank(s)	Blank(s)	Blank(s)	Blank(s)	Blank(s)	Blank(s)	Blank(s)	Blank(s)	Blank(s)	Complete dates are available and there are more than 0 days of survival	Liver	1324	776	784	1328	817	1346	1230	761	0	1977	Blank(s)	Blank(s)	Blank(s)	Dead
80-84 years	White	Female	Positive histology	Unknown	Liver	8170	Blank(s)	Blank(s)	Blank(s)	Blank(s)	Blank(s)	Blank(s)	Recommended but not performed, unknown reason	Blank(s)	Blank(s)	Blank(s)	9	Blank(s)	Blank(s)	Blank(s)	Blank(s)	Blank(s)	Blank(s)	Blank(s)	Blank(s)	Blank(s)	Complete dates are available and there are more than 0 days of survival	Liver	1324	776	784	1328	817	1346	1230	761	1	1978	Blank(s)	Blank(s)	Blank(s)	Dead
50-54 years	White	Male	Positive histology	Unknown	Liver	8170	Blank(s)	Blank(s)	Blank(s)	Blank(s)	Blank(s)	Blank(s)	Recommended but not performed, unknown reason	Blank(s)	Blank(s)	Blank(s)	9	Blank(s)	Blank(s)	Blank(s)	Blank(s)	Blank(s)	Blank(s)	Blank(s)	Blank(s)	Blank(s)	Complete dates are available and there are more than 0 days of survival	Liver	1085	781	766	1065	760	1053	988	715	0	1977	Blank(s)	Blank(s)	Blank(s)	Dead
45-49 years	White	Female	Positive histology	Unknown	Liver	8240	Blank(s)	Blank(s)	Blank(s)	Blank(s)	Blank(s)	Blank(s)	Surgery performed	Blank(s)	Blank(s)	Blank(s)	90	Blank(s)	Blank(s)	Blank(s)	Blank(s)	Blank(s)	Blank(s)	Blank(s)	Blank(s)	Blank(s)	Complete dates are available and there are more than 0 days of survival	Other Cause of Death	797	484	467	759	477	760	695	453	1	1978	Blank(s)	Blank(s)	Blank(s)	Dead
40-44 years	White	Female	Positive histology	Unknown	Liver	8170	Blank(s)	Blank(s)	Blank(s)	Blank(s)	Blank(s)	Blank(s)	Recommended but not performed, unknown reason	Blank(s)	Blank(s)	Blank(s)	9	Blank(s)	Blank(s)	Blank(s)	Blank(s)	Blank(s)	Blank(s)	Blank(s)	Blank(s)	Blank(s)	Complete dates are available and there are more than 0 days of survival	Pancreas	1250	851	883	1288	861	1250	1179	819	24	1977	Blank(s)	Blank(s)	Blank(s)	Dead
70-74 years	White	Female	Positive histology	Unknown	Liver	8170	Blank(s)	Blank(s)	Blank(s)	Blank(s)	Blank(s)	Blank(s)	Recommended but not performed, unknown reason	Blank(s)	Blank(s)	Blank(s)	9	Blank(s)	Blank(s)	Blank(s)	Blank(s)	Blank(s)	Blank(s)	Blank(s)	Blank(s)	Blank(s)	Complete dates are available and there are more than 0 days of survival	Liver	1085	781	766	1065	760	1053	988	715	2	1981	Blank(s)	Blank(s)	Blank(s)	Dead
00 years	White	Female	Positive histology	Unknown	Liver	8970	Blank(s)	Blank(s)	Blank(s)	Blank(s)	Blank(s)	Blank(s)	Surgery performed	Blank(s)	Blank(s)	Blank(s)	90	Blank(s)	Blank(s)	Blank(s)	Blank(s)	Blank(s)	Blank(s)	Blank(s)	Blank(s)	Blank(s)	Complete dates are available and there are more than 0 days of survival	Alive	1085	781	766	1065	760	1053	988	715	458	1978	Blank(s)	Blank(s)	Blank(s)	Alive
80-84 years	White	Female	Positive exfoliative cytology, no positive histology	Well differentiated; Grade I	Liver	8170	Blank(s)	UNK Stage	Blank(s)	0	None	None; diagnosed at autopsy	Not recommended	Blank(s)	Blank(s)	Blank(s)	Blank(s)	Blank(s)	0	999	999	999	99	9	999	999	Complete dates are available and there are more than 0 days of survival	Liver	833	495	534	878	444	774	723	419	7	2005	Blank(s)	Blank(s)	Blank(s)	Dead
60-64 years	Black	Male	Positive histology	Unknown	Liver	8170	Blank(s)	Blank(s)	Blank(s)	Blank(s)	Blank(s)	Blank(s)	Not recommended, contraindicated due to other cond; autopsy only (1973-2002)	Blank(s)	Blank(s)	Blank(s)	0	Blank(s)	Blank(s)	Blank(s)	Blank(s)	Blank(s)	Blank(s)	Blank(s)	Blank(s)	Blank(s)	Not calculated because a Death Certificate Only or Autopsy Only case	Diseases of Heart	1250	851	883	1288	861	1250	1179	819	Unknown	1976	Blank(s)	Blank(s)	Blank(s)	Dead
50-54 years	Black	Male	Positive histology	Unknown	Liver	8170	Blank(s)	Blank(s)	88	0	Blank(s)	Blank(s)	Not recommended	0	0	0	Blank(s)	Blank(s)	0	Blank(s)	Blank(s)	Blank(s)	Blank(s)	Blank(s)	Blank(s)	Blank(s)	Complete dates are available and there are more than 0 days of survival	Chronic Liver Disease and Cirrhosis	1250	851	883	1288	861	1250	1179	819	8	1998	Blank(s)	Blank(s)	Blank(s)	Dead
65-69 years	Other (American Indian/AK Native, Asian/Pacific Islander)	Male	Radiography without microscopic confirm	Unknown	Liver	8170	Blank(s)	Blank(s)	Blank(s)	Blank(s)	Blank(s)	Blank(s)	Recommended but not performed, unknown reason	Blank(s)	Blank(s)	Blank(s)	9	Blank(s)	Blank(s)	Blank(s)	Blank(s)	Blank(s)	Blank(s)	Blank(s)	Blank(s)	Blank(s)	Complete dates are available and there are more than 0 days of survival	Liver	1250	851	883	1288	861	1250	1179	819	5	1980	Blank(s)	Blank(s)	Blank(s)	Dead
80-84 years	White	Male	Positive histology	Unknown	Liver	8170	Blank(s)	Blank(s)	Blank(s)	Blank(s)	Blank(s)	Blank(s)	Recommended but not performed, unknown reason	Blank(s)	Blank(s)	Blank(s)	9	Blank(s)	Blank(s)	Blank(s)	Blank(s)	Blank(s)	Blank(s)	Blank(s)	Blank(s)	Blank(s)	Complete dates are available and there are more than 0 days of survival	Liver	797	484	467	759	477	760	695	453	4	1978	Blank(s)	Blank(s)	Blank(s)	Dead
70-74 years	Other (American Indian/AK Native, Asian/Pacific Islander)	Male	Positive histology	Unknown	Liver	8170	Blank(s)	Blank(s)	Blank(s)	Blank(s)	Blank(s)	Blank(s)	Recommended but not performed, unknown reason	Blank(s)	Blank(s)	Blank(s)	9	Blank(s)	Blank(s)	Blank(s)	Blank(s)	Blank(s)	Blank(s)	Blank(s)	Blank(s)	Blank(s)	Complete dates are available and there are more than 0 days of survival	Liver	1250	851	883	1288	861	1250	1179	819	3	1980	Blank(s)	Blank(s)	Blank(s)	Dead
70-74 years	Black	Female	Positive histology	Unknown	Liver	8003	Blank(s)	Blank(s)	Blank(s)	Blank(s)	Blank(s)	Blank(s)	Recommended but not performed, unknown reason	Blank(s)	Blank(s)	Blank(s)	9	Blank(s)	Blank(s)	Blank(s)	Blank(s)	Blank(s)	Blank(s)	Blank(s)	Blank(s)	Blank(s)	Complete dates are available and there are more than 0 days of survival	Liver	833	495	534	878	444	774	723	419	1	1976	Blank(s)	Blank(s)	Blank(s)	Dead
70-74 years	White	Female	Positive histology	Unknown	Liver	8310	Blank(s)	Blank(s)	Blank(s)	Blank(s)	Blank(s)	Blank(s)	Recommended but not performed, unknown reason	Blank(s)	Blank(s)	Blank(s)	9	Blank(s)	Blank(s)	Blank(s)	Blank(s)	Blank(s)	Blank(s)	Blank(s)	Blank(s)	Blank(s)	Complete dates are available and there are more than 0 days of survival	Liver	1085	781	766	1065	760	1053	988	715	3	1975	Blank(s)	Blank(s)	Blank(s)	Dead
70-74 years	White	Male	Positive histology	Unknown	Liver	8170	Blank(s)	Blank(s)	Blank(s)	Blank(s)	Blank(s)	Blank(s)	Recommended but not performed, unknown reason	Blank(s)	Blank(s)	Blank(s)	9	Blank(s)	Blank(s)	Blank(s)	Blank(s)	Blank(s)	Blank(s)	Blank(s)	Blank(s)	Blank(s)	Complete dates are available and there are more than 0 days of survival	Liver	1324	776	784	1328	817	1346	1230	761	16	1980	Blank(s)	Blank(s)	Blank(s)	Dead
65-69 years	Other (American Indian/AK Native, Asian/Pacific Islander)	Male	Positive histology	Undifferentiated; anaplastic; Grade IV	Liver	8170	Blank(s)	Blank(s)	Blank(s)	Blank(s)	Blank(s)	Blank(s)	Recommended but not performed, unknown reason	Blank(s)	Blank(s)	Blank(s)	9	Blank(s)	Blank(s)	Blank(s)	Blank(s)	Blank(s)	Blank(s)	Blank(s)	Blank(s)	Blank(s)	Complete dates are available and there are more than 0 days of survival	Liver	1324	776	784	1328	817	1346	1230	761	1	1975	Blank(s)	Blank(s)	Blank(s)	Dead
80-84 years	White	Male	Positive histology	Poorly differentiated; Grade III	Liver	8170	Blank(s)	Blank(s)	Blank(s)	Blank(s)	Blank(s)	Blank(s)	Surgery performed	Blank(s)	Blank(s)	Blank(s)	90	Blank(s)	Blank(s)	Blank(s)	Blank(s)	Blank(s)	Blank(s)	Blank(s)	Blank(s)	Blank(s)	Complete dates are available and there are more than 0 days of survival	Lung and Bronchus	1085	781	766	1065	760	1053	988	715	2	1979	Blank(s)	Blank(s)	Blank(s)	Dead
75-79 years	White	Male	Positive histology	Unknown	Liver	8170	Blank(s)	Blank(s)	Blank(s)	Blank(s)	Blank(s)	Blank(s)	Recommended but not performed, unknown reason	Blank(s)	Blank(s)	Blank(s)	9	Blank(s)	Blank(s)	Blank(s)	Blank(s)	Blank(s)	Blank(s)	Blank(s)	Blank(s)	Blank(s)	Complete dates are available and there are more than 0 days of survival	In situ, benign or unknown behavior neoplasm	1324	776	784	1328	817	1346	1230	761	0	1976	Blank(s)	Blank(s)	Blank(s)	Dead
70-74 years	Other (American Indian/AK Native, Asian/Pacific Islander)	Male	Positive histology	Unknown	Liver	8170	Blank(s)	Blank(s)	Blank(s)	Blank(s)	Blank(s)	Blank(s)	Recommended but not performed, unknown reason	Blank(s)	Blank(s)	Blank(s)	9	Blank(s)	Blank(s)	Blank(s)	Blank(s)	Blank(s)	Blank(s)	Blank(s)	Blank(s)	Blank(s)	Complete dates are available and there are more than 0 days of survival	Liver	1324	776	784	1328	817	1346	1230	761	3	1979	Blank(s)	Blank(s)	Blank(s)	Dead
65-69 years	White	Female	Positive histology	Unknown	Liver	8170	Blank(s)	Blank(s)	Blank(s)	Blank(s)	Blank(s)	Blank(s)	Surgery performed	Blank(s)	Blank(s)	Blank(s)	90	Blank(s)	Blank(s)	Blank(s)	Blank(s)	Blank(s)	Blank(s)	Blank(s)	Blank(s)	Blank(s)	Complete dates are available and there are more than 0 days of survival	Liver	1324	776	784	1328	817	1346	1230	761	6	1979	Blank(s)	Blank(s)	Blank(s)	Dead
60-64 years	White	Female	Positive histology	Unknown	Liver	8010	Blank(s)	Blank(s)	Blank(s)	Blank(s)	Blank(s)	Blank(s)	Surgery performed	Blank(s)	Blank(s)	Blank(s)	90	Blank(s)	Blank(s)	Blank(s)	Blank(s)	Blank(s)	Blank(s)	Blank(s)	Blank(s)	Blank(s)	Complete dates are available and there are more than 0 days of survival	Liver	1085	781	766	1065	760	1053	988	715	3	1975	Blank(s)	Blank(s)	Blank(s)	Dead
50-54 years	White	Male	Positive histology	Unknown	Liver	8170	Blank(s)	Blank(s)	88	Blank(s)	Blank(s)	Blank(s)	Not recommended	Blank(s)	Blank(s)	Blank(s)	2	Blank(s)	0	Blank(s)	Blank(s)	Blank(s)	Blank(s)	Blank(s)	Blank(s)	Blank(s)	Complete dates are available and there are more than 0 days of survival	Liver	1250	851	883	1288	861	1250	1179	819	0	1992	Blank(s)	Blank(s)	Blank(s)	Dead
55-59 years	Other (American Indian/AK Native, Asian/Pacific Islander)	Male	Positive histology	Unknown	Liver	8170	Blank(s)	Blank(s)	Blank(s)	Blank(s)	Blank(s)	Blank(s)	Recommended but not performed, unknown reason	Blank(s)	Blank(s)	Blank(s)	9	Blank(s)	Blank(s)	Blank(s)	Blank(s)	Blank(s)	Blank(s)	Blank(s)	Blank(s)	Blank(s)	Complete dates are available and there are more than 0 days of survival	Chronic Liver Disease and Cirrhosis	1250	851	883	1288	861	1250	1179	819	0	1980	Blank(s)	Blank(s)	Blank(s)	Dead
65-69 years	Other (American Indian/AK Native, Asian/Pacific Islander)	Male	Positive histology	Unknown	Liver	8010	Blank(s)	Blank(s)	Blank(s)	Blank(s)	Blank(s)	Blank(s)	Surgery performed	Blank(s)	Blank(s)	Blank(s)	90	Blank(s)	Blank(s)	Blank(s)	Blank(s)	Blank(s)	Blank(s)	Blank(s)	Blank(s)	Blank(s)	Incomplete dates are available and there cannot be zero days of follow-up	State DC not available or state DC available but no COD	1250	851	883	1288	861	1250	1179	819	5	1975	Blank(s)	Blank(s)	Blank(s)	Dead
85+ years	White	Female	Positive histology	Unknown	Liver	8170	Blank(s)	Blank(s)	Blank(s)	Blank(s)	Blank(s)	Blank(s)	Recommended but not performed, unknown reason	Blank(s)	Blank(s)	Blank(s)	9	Blank(s)	Blank(s)	Blank(s)	Blank(s)	Blank(s)	Blank(s)	Blank(s)	Blank(s)	Blank(s)	Complete dates are available and there are more than 0 days of survival	Miscellaneous Malignant Cancer	1250	851	883	1288	861	1250	1179	819	1	1975	Blank(s)	Blank(s)	Blank(s)	Dead
45-49 years	Other (American Indian/AK Native, Asian/Pacific Islander)	Female	Positive histology	Unknown	Liver	8170	Blank(s)	Blank(s)	Blank(s)	Blank(s)	Blank(s)	Blank(s)	Surgery performed	Blank(s)	Blank(s)	Blank(s)	90	Blank(s)	Blank(s)	Blank(s)	Blank(s)	Blank(s)	Blank(s)	Blank(s)	Blank(s)	Blank(s)	Complete dates are available and there are more than 0 days of survival	Liver	1324	776	784	1328	817	1346	1230	761	6	1980	Blank(s)	Blank(s)	Blank(s)	Dead
80-84 years	White	Female	Positive exfoliative cytology, no positive histology	Unknown	Liver	8170	Blank(s)	Blank(s)	88	Blank(s)	Blank(s)	Blank(s)	Recommended but not performed, unknown reason	Blank(s)	Blank(s)	Blank(s)	0	Blank(s)	0	Blank(s)	Blank(s)	Blank(s)	Blank(s)	Blank(s)	Blank(s)	Blank(s)	Complete dates are available and there are more than 0 days of survival	Liver	1250	851	883	1288	861	1250	1179	819	1	1990	Blank(s)	Blank(s)	Blank(s)	Dead
55-59 years	White	Male	Positive histology	Unknown	Liver	8170	Blank(s)	Blank(s)	Blank(s)	Blank(s)	Blank(s)	Blank(s)	Recommended but not performed, unknown reason	Blank(s)	Blank(s)	Blank(s)	9	Blank(s)	Blank(s)	Blank(s)	Blank(s)	Blank(s)	Blank(s)	Blank(s)	Blank(s)	Blank(s)	Complete dates are available and there are more than 0 days of survival	Liver	1085	781	766	1065	760	1053	988	715	9	1979	Blank(s)	Blank(s)	Blank(s)	Dead
80-84 years	White	Female	Positive histology	Unknown	Liver	8170	Blank(s)	Blank(s)	Blank(s)	Blank(s)	Blank(s)	Blank(s)	Recommended but not performed, unknown reason	Blank(s)	Blank(s)	Blank(s)	9	Blank(s)	Blank(s)	Blank(s)	Blank(s)	Blank(s)	Blank(s)	Blank(s)	Blank(s)	Blank(s)	Complete dates are available and there are more than 0 days of survival	Liver	1324	776	784	1328	817	1346	1230	761	4	1983	Blank(s)	Blank(s)	Blank(s)	Dead
50-54 years	White	Male	Positive histology	Moderately differentiated; Grade II	Liver	8170	Blank(s)	Blank(s)	Blank(s)	Blank(s)	Blank(s)	Blank(s)	Surgery performed	Blank(s)	Blank(s)	Blank(s)	90	Blank(s)	Blank(s)	Blank(s)	Blank(s)	Blank(s)	Blank(s)	Blank(s)	Blank(s)	Blank(s)	Complete dates are available and there are more than 0 days of survival	Liver	1250	851	883	1288	861	1250	1179	819	81	1977	Blank(s)	Blank(s)	Blank(s)	Dead
60-64 years	White	Male	Positive histology	Moderately differentiated; Grade II	Liver	8170	Blank(s)	Blank(s)	Blank(s)	Blank(s)	Blank(s)	Blank(s)	Recommended but not performed, unknown reason	Blank(s)	Blank(s)	Blank(s)	9	Blank(s)	Blank(s)	Blank(s)	Blank(s)	Blank(s)	Blank(s)	Blank(s)	Blank(s)	Blank(s)	Complete dates are available and there are more than 0 days of survival	Liver	1250	851	883	1288	861	1250	1179	819	3	1979	Blank(s)	Blank(s)	Blank(s)	Dead
35-39 years	Other (American Indian/AK Native, Asian/Pacific Islander)	Male	Positive histology	Unknown	Liver	8170	Blank(s)	Blank(s)	Blank(s)	Blank(s)	Blank(s)	Blank(s)	Recommended but not performed, unknown reason	Blank(s)	Blank(s)	Blank(s)	9	Blank(s)	Blank(s)	Blank(s)	Blank(s)	Blank(s)	Blank(s)	Blank(s)	Blank(s)	Blank(s)	Complete dates are available and there are more than 0 days of survival	Liver	1324	776	784	1328	817	1346	1230	761	2	1980	Blank(s)	Blank(s)	Blank(s)	Dead
70-74 years	White	Male	Positive histology	Undifferentiated; anaplastic; Grade IV	Liver	8170	Blank(s)	Blank(s)	Blank(s)	Blank(s)	Blank(s)	Blank(s)	Recommended but not performed, unknown reason	Blank(s)	Blank(s)	Blank(s)	9	Blank(s)	Blank(s)	Blank(s)	Blank(s)	Blank(s)	Blank(s)	Blank(s)	Blank(s)	Blank(s)	Complete dates are available and there are more than 0 days of survival	Liver	1324	776	784	1328	817	1346	1230	761	0	1976	Blank(s)	Blank(s)	Blank(s)	Dead
50-54 years	White	Female	Positive histology	Unknown	Liver	8170	Blank(s)	Blank(s)	Blank(s)	Blank(s)	Blank(s)	Blank(s)	Recommended but not performed, unknown reason	Blank(s)	Blank(s)	Blank(s)	9	Blank(s)	Blank(s)	Blank(s)	Blank(s)	Blank(s)	Blank(s)	Blank(s)	Blank(s)	Blank(s)	Complete dates are available and there are more than 0 days of survival	Liver	1324	776	784	1328	817	1346	1230	761	1	1976	Blank(s)	Blank(s)	Blank(s)	Dead
65-69 years	Black	Male	Unknown	Unknown	Liver	8010	Blank(s)	Blank(s)	Blank(s)	Blank(s)	Blank(s)	Blank(s)	Unknown; death certificate; or autopsy only (2003+)	Blank(s)	Blank(s)	Blank(s)	9	Blank(s)	Blank(s)	Blank(s)	Blank(s)	Blank(s)	Blank(s)	Blank(s)	Blank(s)	Blank(s)	Not calculated because a Death Certificate Only or Autopsy Only case	Liver	1250	851	883	1288	861	1250	1179	819	Unknown	1975	Blank(s)	Blank(s)	Blank(s)	Dead
75-79 years	Other (American Indian/AK Native, Asian/Pacific Islander)	Male	Positive histology	Unknown	Liver	8170	Blank(s)	Blank(s)	Blank(s)	Blank(s)	Blank(s)	Blank(s)	Recommended but not performed, unknown reason	Blank(s)	Blank(s)	Blank(s)	9	Blank(s)	Blank(s)	Blank(s)	Blank(s)	Blank(s)	Blank(s)	Blank(s)	Blank(s)	Blank(s)	Complete dates are available and there are more than 0 days of survival	Liver	1324	776	784	1328	817	1346	1230	761	0	1977	Blank(s)	Blank(s)	Blank(s)	Dead
55-59 years	White	Female	Positive histology	Unknown	Liver	8170	Blank(s)	Blank(s)	Blank(s)	Blank(s)	Blank(s)	Blank(s)	Recommended but not performed, unknown reason	Blank(s)	Blank(s)	Blank(s)	9	Blank(s)	Blank(s)	Blank(s)	Blank(s)	Blank(s)	Blank(s)	Blank(s)	Blank(s)	Blank(s)	Complete dates are available and there are more than 0 days of survival	In situ, benign or unknown behavior neoplasm	1324	776	784	1328	817	1346	1230	761	0	1976	Blank(s)	Blank(s)	Blank(s)	Dead
70-74 years	Other (American Indian/AK Native, Asian/Pacific Islander)	Male	Positive histology	Unknown	Liver	8170	Blank(s)	Blank(s)	Blank(s)	Blank(s)	Blank(s)	Blank(s)	Surgery performed	Blank(s)	Blank(s)	Blank(s)	90	Blank(s)	Blank(s)	Blank(s)	Blank(s)	Blank(s)	Blank(s)	Blank(s)	Blank(s)	Blank(s)	Complete dates are available and there are more than 0 days of survival	Liver	1324	776	784	1328	817	1346	1230	761	0	1976	Blank(s)	Blank(s)	Blank(s)	Dead
55-59 years	Other (American Indian/AK Native, Asian/Pacific Islander)	Male	Radiography without microscopic confirm	Unknown	Liver	8170	Blank(s)	Blank(s)	Blank(s)	Blank(s)	Blank(s)	Blank(s)	Recommended but not performed, unknown reason	Blank(s)	Blank(s)	Blank(s)	9	Blank(s)	Blank(s)	Blank(s)	Blank(s)	Blank(s)	Blank(s)	Blank(s)	Blank(s)	Blank(s)	Complete dates are available and there are more than 0 days of survival	Liver	1324	776	784	1328	817	1346	1230	761	0	1980	Blank(s)	Blank(s)	Blank(s)	Dead
75-79 years	White	Male	Radiography without microscopic confirm	Unknown	Liver	8000	Blank(s)	Blank(s)	Blank(s)	Blank(s)	Blank(s)	Blank(s)	Recommended but not performed, unknown reason	Blank(s)	Blank(s)	Blank(s)	9	Blank(s)	Blank(s)	Blank(s)	Blank(s)	Blank(s)	Blank(s)	Blank(s)	Blank(s)	Blank(s)	Complete dates are available and there are more than 0 days of survival	Other Cause of Death	1085	781	766	1065	760	1053	988	715	72	1978	Blank(s)	Blank(s)	Blank(s)	Dead
70-74 years	Other (American Indian/AK Native, Asian/Pacific Islander)	Male	Radiography without microscopic confirm	Unknown	Liver	8170	Blank(s)	Blank(s)	Blank(s)	Blank(s)	Blank(s)	Blank(s)	Recommended but not performed, unknown reason	Blank(s)	Blank(s)	Blank(s)	9	Blank(s)	Blank(s)	Blank(s)	Blank(s)	Blank(s)	Blank(s)	Blank(s)	Blank(s)	Blank(s)	Complete dates are available and there are more than 0 days of survival	Liver	1324	776	784	1328	817	1346	1230	761	0	1979	Blank(s)	Blank(s)	Blank(s)	Dead
70-74 years	Black	Male	Positive histology	Well differentiated; Grade I	Liver	8170	Blank(s)	Blank(s)	88	Blank(s)	Blank(s)	Blank(s)	Surgery performed	Blank(s)	Blank(s)	Blank(s)	35	Blank(s)	0	Blank(s)	Blank(s)	Blank(s)	Blank(s)	Blank(s)	Blank(s)	Blank(s)	Complete dates are available and there are more than 0 days of survival	Other Cause of Death	1324	776	784	1328	817	1346	1230	761	24	1989	Blank(s)	Blank(s)	Blank(s)	Dead
30-34 years	White	Male	Positive histology	Undifferentiated; anaplastic; Grade IV	Liver	8170	Blank(s)	Blank(s)	Blank(s)	Blank(s)	Blank(s)	Blank(s)	Recommended but not performed, unknown reason	Blank(s)	Blank(s)	Blank(s)	9	Blank(s)	Blank(s)	Blank(s)	Blank(s)	Blank(s)	Blank(s)	Blank(s)	Blank(s)	Blank(s)	Complete dates are available and there are more than 0 days of survival	Miscellaneous Malignant Cancer	1085	781	766	1065	760	1053	988	715	2	1979	Blank(s)	Blank(s)	Blank(s)	Dead
60-64 years	Black	Female	Positive histology	Undifferentiated; anaplastic; Grade IV	Liver	8020	Blank(s)	Blank(s)	Blank(s)	Blank(s)	Blank(s)	Blank(s)	Not recommended, contraindicated due to other cond; autopsy only (1973-2002)	Blank(s)	Blank(s)	Blank(s)	0	Blank(s)	Blank(s)	Blank(s)	Blank(s)	Blank(s)	Blank(s)	Blank(s)	Blank(s)	Blank(s)	Not calculated because a Death Certificate Only or Autopsy Only case	Liver	1250	851	883	1288	861	1250	1179	819	Unknown	1978	Blank(s)	Blank(s)	Blank(s)	Dead
75-79 years	White	Male	Clinical diagnosis only	Unknown	Liver	8170	Blank(s)	Blank(s)	Blank(s)	Blank(s)	Blank(s)	Blank(s)	Recommended but not performed, unknown reason	Blank(s)	Blank(s)	Blank(s)	9	Blank(s)	Blank(s)	Blank(s)	Blank(s)	Blank(s)	Blank(s)	Blank(s)	Blank(s)	Blank(s)	Complete dates are available and there are more than 0 days of survival	Liver	833	495	534	878	444	774	723	419	3	1976	Blank(s)	Blank(s)	Blank(s)	Dead
80-84 years	White	Male	Unknown	Unknown	Liver	8170	Blank(s)	Blank(s)	Blank(s)	Blank(s)	Blank(s)	Blank(s)	Unknown; death certificate; or autopsy only (2003+)	Blank(s)	Blank(s)	Blank(s)	9	Blank(s)	Blank(s)	Blank(s)	Blank(s)	Blank(s)	Blank(s)	Blank(s)	Blank(s)	Blank(s)	Not calculated because a Death Certificate Only or Autopsy Only case	Stomach and Duodenal Ulcers	1250	851	883	1288	861	1250	1179	819	Unknown	1978	Blank(s)	Blank(s)	Blank(s)	Dead
65-69 years	White	Male	Positive histology	Unknown	Liver	8170	Blank(s)	Blank(s)	Blank(s)	Blank(s)	Blank(s)	Blank(s)	Recommended but not performed, unknown reason	Blank(s)	Blank(s)	Blank(s)	9	Blank(s)	Blank(s)	Blank(s)	Blank(s)	Blank(s)	Blank(s)	Blank(s)	Blank(s)	Blank(s)	Complete dates are available and there are more than 0 days of survival	Liver	1085	781	766	1065	760	1053	988	715	0	1981	Blank(s)	Blank(s)	Blank(s)	Dead
85+ years	White	Female	Direct visualization without microscopic confirmation	Unknown	Liver	8010	Blank(s)	Blank(s)	Blank(s)	Blank(s)	Blank(s)	Blank(s)	Recommended but not performed, unknown reason	Blank(s)	Blank(s)	Blank(s)	9	Blank(s)	Blank(s)	Blank(s)	Blank(s)	Blank(s)	Blank(s)	Blank(s)	Blank(s)	Blank(s)	Complete dates are available and there are 0 days of survival	Liver	1324	776	784	1328	817	1346	1230	761	0	1978	Blank(s)	Blank(s)	Blank(s)	Dead
15-19 years	White	Male	Unknown	Unknown	Liver	8170	Blank(s)	Blank(s)	Blank(s)	Blank(s)	Blank(s)	Blank(s)	Unknown; death certificate; or autopsy only (2003+)	Blank(s)	Blank(s)	Blank(s)	9	Blank(s)	Blank(s)	Blank(s)	Blank(s)	Blank(s)	Blank(s)	Blank(s)	Blank(s)	Blank(s)	Not calculated because a Death Certificate Only or Autopsy Only case	Liver	797	484	467	759	477	760	695	453	Unknown	1978	Blank(s)	Blank(s)	Blank(s)	Dead
30-34 years	Other (American Indian/AK Native, Asian/Pacific Islander)	Male	Positive histology	Unknown	Liver	8170	Blank(s)	Blank(s)	Blank(s)	Blank(s)	Blank(s)	Blank(s)	Recommended but not performed, unknown reason	Blank(s)	Blank(s)	Blank(s)	9	Blank(s)	Blank(s)	Blank(s)	Blank(s)	Blank(s)	Blank(s)	Blank(s)	Blank(s)	Blank(s)	Complete dates are available and there are more than 0 days of survival	Liver	1324	776	784	1328	817	1346	1230	761	5	1975	Blank(s)	Blank(s)	Blank(s)	Dead
60-64 years	Other (American Indian/AK Native, Asian/Pacific Islander)	Male	Positive histology	Poorly differentiated; Grade III	Liver	8010	Blank(s)	Blank(s)	Blank(s)	Blank(s)	Blank(s)	Blank(s)	Recommended but not performed, unknown reason	Blank(s)	Blank(s)	Blank(s)	9	Blank(s)	Blank(s)	Blank(s)	Blank(s)	Blank(s)	Blank(s)	Blank(s)	Blank(s)	Blank(s)	Complete dates are available and there are more than 0 days of survival	Liver	1324	776	784	1328	817	1346	1230	761	1	1979	Blank(s)	Blank(s)	Blank(s)	Dead
55-59 years	White	Female	Positive histology	Unknown	Liver	8170	Blank(s)	Blank(s)	Blank(s)	Blank(s)	Blank(s)	Blank(s)	Recommended but not performed, unknown reason	Blank(s)	Blank(s)	Blank(s)	9	Blank(s)	Blank(s)	Blank(s)	Blank(s)	Blank(s)	Blank(s)	Blank(s)	Blank(s)	Blank(s)	Complete dates are available and there are more than 0 days of survival	Liver	1085	781	766	1065	760	1053	988	715	0	1980	Blank(s)	Blank(s)	Blank(s)	Dead
75-79 years	Other (American Indian/AK Native, Asian/Pacific Islander)	Male	Unknown	Unknown	Liver	8170	Blank(s)	Blank(s)	Blank(s)	Blank(s)	Blank(s)	Blank(s)	Unknown; death certificate; or autopsy only (2003+)	Blank(s)	Blank(s)	Blank(s)	9	Blank(s)	Blank(s)	Blank(s)	Blank(s)	Blank(s)	Blank(s)	Blank(s)	Blank(s)	Blank(s)	Not calculated because a Death Certificate Only or Autopsy Only case	Chronic Liver Disease and Cirrhosis	797	484	467	759	477	760	695	453	Unknown	1978	Blank(s)	Blank(s)	Blank(s)	Dead
70-74 years	White	Male	Positive histology	Unknown	Liver	8170	Blank(s)	Blank(s)	Blank(s)	Blank(s)	Blank(s)	Blank(s)	Recommended but not performed, unknown reason	Blank(s)	Blank(s)	Blank(s)	9	Blank(s)	Blank(s)	Blank(s)	Blank(s)	Blank(s)	Blank(s)	Blank(s)	Blank(s)	Blank(s)	Complete dates are available and there are more than 0 days of survival	Diseases of Heart	1324	776	784	1328	817	1346	1230	761	0	1978	Blank(s)	Blank(s)	Blank(s)	Dead
45-49 years	White	Female	Positive histology	Poorly differentiated; Grade III	Liver	8170	Blank(s)	Blank(s)	Blank(s)	Blank(s)	Blank(s)	Blank(s)	Recommended but not performed, unknown reason	Blank(s)	Blank(s)	Blank(s)	9	Blank(s)	Blank(s)	Blank(s)	Blank(s)	Blank(s)	Blank(s)	Blank(s)	Blank(s)	Blank(s)	Complete dates are available and there are more than 0 days of survival	Liver	1085	781	766	1065	760	1053	988	715	8	1981	Blank(s)	Blank(s)	Blank(s)	Dead
55-59 years	Other (American Indian/AK Native, Asian/Pacific Islander)	Male	Radiography without microscopic confirm	Unknown	Liver	8170	Blank(s)	Blank(s)	Blank(s)	Blank(s)	Blank(s)	Blank(s)	Recommended but not performed, unknown reason	Blank(s)	Blank(s)	Blank(s)	9	Blank(s)	Blank(s)	Blank(s)	Blank(s)	Blank(s)	Blank(s)	Blank(s)	Blank(s)	Blank(s)	Complete dates are available and there are more than 0 days of survival	Chronic Liver Disease and Cirrhosis	1324	776	784	1328	817	1346	1230	761	1	1978	Blank(s)	Blank(s)	Blank(s)	Dead
60-64 years	Unknown	Male	Positive histology	Unknown	Liver	8170	Blank(s)	Blank(s)	Blank(s)	Blank(s)	Blank(s)	Blank(s)	Recommended but not performed, unknown reason	Blank(s)	Blank(s)	Blank(s)	9	Blank(s)	Blank(s)	Blank(s)	Blank(s)	Blank(s)	Blank(s)	Blank(s)	Blank(s)	Blank(s)	Complete dates are available and there are more than 0 days of survival	Cerebrovascular Diseases	1250	851	883	1288	861	1250	1179	819	5	1979	Blank(s)	Blank(s)	Blank(s)	Dead
65-69 years	White	Male	Positive histology	Unknown	Liver	8010	Blank(s)	Blank(s)	Blank(s)	Blank(s)	Blank(s)	Blank(s)	Recommended but not performed, unknown reason	Blank(s)	Blank(s)	Blank(s)	9	Blank(s)	Blank(s)	Blank(s)	Blank(s)	Blank(s)	Blank(s)	Blank(s)	Blank(s)	Blank(s)	Complete dates are available and there are more than 0 days of survival	Liver	1324	776	784	1328	817	1346	1230	761	0	1978	Blank(s)	Blank(s)	Blank(s)	Dead
70-74 years	White	Male	Positive histology	Unknown	BileDuctsIntraHepat	8180	Blank(s)	Blank(s)	Blank(s)	Blank(s)	Blank(s)	Blank(s)	Recommended but not performed, unknown reason	Blank(s)	Blank(s)	Blank(s)	9	Blank(s)	Blank(s)	Blank(s)	Blank(s)	Blank(s)	Blank(s)	Blank(s)	Blank(s)	Blank(s)	Complete dates are available and there are more than 0 days of survival	Diseases of Heart	1250	851	883	1288	861	1250	1179	819	3	1976	Blank(s)	Blank(s)	Blank(s)	Dead
70-74 years	Other (American Indian/AK Native, Asian/Pacific Islander)	Female	Positive histology	Unknown	Liver	8170	Blank(s)	Blank(s)	Blank(s)	Blank(s)	Blank(s)	Blank(s)	Recommended but not performed, unknown reason	Blank(s)	Blank(s)	Blank(s)	9	Blank(s)	Blank(s)	Blank(s)	Blank(s)	Blank(s)	Blank(s)	Blank(s)	Blank(s)	Blank(s)	Incomplete dates are available and there cannot be zero days of follow-up	Liver	1324	776	784	1328	817	1346	1230	761	0	1979	Blank(s)	Blank(s)	Blank(s)	Dead
70-74 years	White	Male	Positive histology	Undifferentiated; anaplastic; Grade IV	Liver	8170	Blank(s)	Blank(s)	Blank(s)	Blank(s)	Blank(s)	Blank(s)	Recommended but not performed, unknown reason	Blank(s)	Blank(s)	Blank(s)	9	Blank(s)	Blank(s)	Blank(s)	Blank(s)	Blank(s)	Blank(s)	Blank(s)	Blank(s)	Blank(s)	Complete dates are available and there are more than 0 days of survival	Liver	1085	781	766	1065	760	1053	988	715	1	1975	Blank(s)	Blank(s)	Blank(s)	Dead
80-84 years	White	Female	Positive histology	Unknown	Liver	8170	Blank(s)	Blank(s)	Blank(s)	Blank(s)	Blank(s)	Blank(s)	Recommended but not performed, unknown reason	Blank(s)	Blank(s)	Blank(s)	9	Blank(s)	Blank(s)	Blank(s)	Blank(s)	Blank(s)	Blank(s)	Blank(s)	Blank(s)	Blank(s)	Complete dates are available and there are more than 0 days of survival	Liver	1250	851	883	1288	861	1250	1179	819	18	1984	Blank(s)	Blank(s)	Blank(s)	Dead
55-59 years	White	Male	Unknown	Unknown	Liver	8170	Blank(s)	Blank(s)	Blank(s)	Blank(s)	Blank(s)	Blank(s)	Unknown; death certificate; or autopsy only (2003+)	Blank(s)	Blank(s)	Blank(s)	9	Blank(s)	Blank(s)	Blank(s)	Blank(s)	Blank(s)	Blank(s)	Blank(s)	Blank(s)	Blank(s)	Not calculated because a Death Certificate Only or Autopsy Only case	Liver	1324	776	784	1328	817	1346	1230	761	Unknown	1978	Blank(s)	Blank(s)	Blank(s)	Dead
75-79 years	White	Male	Positive histology	Unknown	Liver	8010	Blank(s)	Blank(s)	Blank(s)	Blank(s)	Blank(s)	Blank(s)	Recommended but not performed, unknown reason	Blank(s)	Blank(s)	Blank(s)	9	Blank(s)	Blank(s)	Blank(s)	Blank(s)	Blank(s)	Blank(s)	Blank(s)	Blank(s)	Blank(s)	Complete dates are available and there are more than 0 days of survival	Liver	1324	776	784	1328	817	1346	1230	761	9	1977	Blank(s)	Blank(s)	Blank(s)	Dead
65-69 years	White	Female	Unknown	Unknown	Liver	8170	Blank(s)	Blank(s)	Blank(s)	Blank(s)	Blank(s)	Blank(s)	Unknown; death certificate; or autopsy only (2003+)	Blank(s)	Blank(s)	Blank(s)	9	Blank(s)	Blank(s)	Blank(s)	Blank(s)	Blank(s)	Blank(s)	Blank(s)	Blank(s)	Blank(s)	Not calculated because a Death Certificate Only or Autopsy Only case	Liver	1324	776	784	1328	817	1346	1230	761	Unknown	1978	Blank(s)	Blank(s)	Blank(s)	Dead
70-74 years	White	Male	Positive exfoliative cytology, no positive histology	Unknown	Liver	8140	Blank(s)	Blank(s)	Blank(s)	Blank(s)	Blank(s)	Blank(s)	Recommended but not performed, unknown reason	Blank(s)	Blank(s)	Blank(s)	9	Blank(s)	Blank(s)	Blank(s)	Blank(s)	Blank(s)	Blank(s)	Blank(s)	Blank(s)	Blank(s)	Complete dates are available and there are more than 0 days of survival	Liver	1324	776	784	1328	817	1346	1230	761	0	1978	Blank(s)	Blank(s)	Blank(s)	Dead
75-79 years	White	Male	Positive histology	Moderately differentiated; Grade II	Liver	8050	Blank(s)	Blank(s)	Blank(s)	Blank(s)	Blank(s)	Blank(s)	Recommended but not performed, unknown reason	Blank(s)	Blank(s)	Blank(s)	9	Blank(s)	Blank(s)	Blank(s)	Blank(s)	Blank(s)	Blank(s)	Blank(s)	Blank(s)	Blank(s)	Complete dates are available and there are more than 0 days of survival	Urinary Bladder	833	495	534	878	444	774	723	419	20	1979	Blank(s)	Blank(s)	Blank(s)	Dead
65-69 years	White	Female	Positive histology	Unknown	Liver	8170	Blank(s)	Blank(s)	Blank(s)	Blank(s)	Blank(s)	Blank(s)	Recommended but not performed, unknown reason	Blank(s)	Blank(s)	Blank(s)	9	Blank(s)	Blank(s)	Blank(s)	Blank(s)	Blank(s)	Blank(s)	Blank(s)	Blank(s)	Blank(s)	Complete dates are available and there are 0 days of survival	Liver	797	484	467	759	477	760	695	453	0	1978	Blank(s)	Blank(s)	Blank(s)	Dead
30-34 years	Other (American Indian/AK Native, Asian/Pacific Islander)	Male	Positive histology	Poorly differentiated; Grade III	Liver	8010	Blank(s)	Blank(s)	Blank(s)	Blank(s)	Blank(s)	Blank(s)	Recommended but not performed, unknown reason	Blank(s)	Blank(s)	Blank(s)	9	Blank(s)	Blank(s)	Blank(s)	Blank(s)	Blank(s)	Blank(s)	Blank(s)	Blank(s)	Blank(s)	Complete dates are available and there are more than 0 days of survival	Liver	1250	851	883	1288	861	1250	1179	819	3	1976	Blank(s)	Blank(s)	Blank(s)	Dead
50-54 years	Black	Male	Radiography without microscopic confirm	Unknown	Liver	8170	Blank(s)	Blank(s)	Blank(s)	Blank(s)	Blank(s)	Blank(s)	Recommended but not performed, unknown reason	Blank(s)	Blank(s)	Blank(s)	9	Blank(s)	Blank(s)	Blank(s)	Blank(s)	Blank(s)	Blank(s)	Blank(s)	Blank(s)	Blank(s)	Complete dates are available and there are more than 0 days of survival	Liver	1250	851	883	1288	861	1250	1179	819	4	1980	Blank(s)	Blank(s)	Blank(s)	Dead
55-59 years	White	Male	Positive histology	Unknown	Liver	8170	Blank(s)	Blank(s)	Blank(s)	Blank(s)	Blank(s)	Blank(s)	Recommended but not performed, unknown reason	Blank(s)	Blank(s)	Blank(s)	9	Blank(s)	Blank(s)	Blank(s)	Blank(s)	Blank(s)	Blank(s)	Blank(s)	Blank(s)	Blank(s)	Complete dates are available and there are more than 0 days of survival	Liver	1085	781	766	1065	760	1053	988	715	0	1975	Blank(s)	Blank(s)	Blank(s)	Dead
65-69 years	White	Male	Positive histology	Unknown	Liver	8170	Blank(s)	Blank(s)	Blank(s)	Blank(s)	Blank(s)	Blank(s)	Recommended but not performed, unknown reason	Blank(s)	Blank(s)	Blank(s)	9	Blank(s)	Blank(s)	Blank(s)	Blank(s)	Blank(s)	Blank(s)	Blank(s)	Blank(s)	Blank(s)	Complete dates are available and there are more than 0 days of survival	Liver	1085	781	766	1065	760	1053	988	715	0	1979	Blank(s)	Blank(s)	Blank(s)	Dead
50-54 years	Black	Male	Positive histology	Poorly differentiated; Grade III	Liver	8010	Blank(s)	Blank(s)	Blank(s)	Blank(s)	Blank(s)	Blank(s)	Recommended but not performed, unknown reason	Blank(s)	Blank(s)	Blank(s)	9	Blank(s)	Blank(s)	Blank(s)	Blank(s)	Blank(s)	Blank(s)	Blank(s)	Blank(s)	Blank(s)	Complete dates are available and there are more than 0 days of survival	Liver	1324	776	784	1328	817	1346	1230	761	0	1979	Blank(s)	Blank(s)	Blank(s)	Dead
85+ years	Black	Male	Positive histology	Unknown	Liver	8170	Blank(s)	Blank(s)	Blank(s)	Blank(s)	Blank(s)	Blank(s)	Recommended but not performed, unknown reason	Blank(s)	Blank(s)	Blank(s)	9	Blank(s)	Blank(s)	Blank(s)	Blank(s)	Blank(s)	Blank(s)	Blank(s)	Blank(s)	Blank(s)	Complete dates are available and there are more than 0 days of survival	Liver	1085	781	766	1065	760	1053	988	715	1	1979	Blank(s)	Blank(s)	Blank(s)	Dead
65-69 years	Black	Male	Unknown	Unknown	Liver	8010	Blank(s)	Blank(s)	Blank(s)	Blank(s)	Blank(s)	Blank(s)	Unknown; death certificate; or autopsy only (2003+)	Blank(s)	Blank(s)	Blank(s)	9	Blank(s)	Blank(s)	Blank(s)	Blank(s)	Blank(s)	Blank(s)	Blank(s)	Blank(s)	Blank(s)	Not calculated because a Death Certificate Only or Autopsy Only case	Miscellaneous Malignant Cancer	833	495	534	878	444	774	723	419	Unknown	1978	Blank(s)	Blank(s)	Blank(s)	Dead
55-59 years	Other (American Indian/AK Native, Asian/Pacific Islander)	Male	Positive histology	Unknown	Liver	8170	Blank(s)	Blank(s)	Blank(s)	Blank(s)	Blank(s)	Blank(s)	Surgery performed	Blank(s)	Blank(s)	Blank(s)	90	Blank(s)	Blank(s)	Blank(s)	Blank(s)	Blank(s)	Blank(s)	Blank(s)	Blank(s)	Blank(s)	Incomplete dates are available and there cannot be zero days of follow-up	Liver	1324	776	784	1328	817	1346	1230	761	1	1978	Blank(s)	Blank(s)	Blank(s)	Dead
60-64 years	White	Male	Positive histology	Unknown	Liver	8170	Blank(s)	Blank(s)	Blank(s)	Blank(s)	Blank(s)	Blank(s)	Not recommended, contraindicated due to other cond; autopsy only (1973-2002)	Blank(s)	Blank(s)	Blank(s)	0	Blank(s)	Blank(s)	Blank(s)	Blank(s)	Blank(s)	Blank(s)	Blank(s)	Blank(s)	Blank(s)	Not calculated because a Death Certificate Only or Autopsy Only case	Other Cause of Death	1324	776	784	1328	817	1346	1230	761	Unknown	1980	Blank(s)	Blank(s)	Blank(s)	Dead
60-64 years	White	Male	Positive histology	Unknown	Liver	8170	Blank(s)	Blank(s)	Blank(s)	Blank(s)	Blank(s)	Blank(s)	Recommended but not performed, unknown reason	Blank(s)	Blank(s)	Blank(s)	9	Blank(s)	Blank(s)	Blank(s)	Blank(s)	Blank(s)	Blank(s)	Blank(s)	Blank(s)	Blank(s)	Complete dates are available and there are 0 days of survival	Chronic Liver Disease and Cirrhosis	1250	851	883	1288	861	1250	1179	819	0	1978	Blank(s)	Blank(s)	Blank(s)	Dead
65-69 years	White	Female	Positive histology	Unknown	Liver	8170	Blank(s)	Blank(s)	Blank(s)	Blank(s)	Blank(s)	Blank(s)	Recommended but not performed, unknown reason	Blank(s)	Blank(s)	Blank(s)	9	Blank(s)	Blank(s)	Blank(s)	Blank(s)	Blank(s)	Blank(s)	Blank(s)	Blank(s)	Blank(s)	Complete dates are available and there are more than 0 days of survival	Intrahepatic Bile Duct	1250	851	883	1288	861	1250	1179	819	0	1978	Blank(s)	Blank(s)	Blank(s)	Dead
60-64 years	White	Female	Positive histology	Undifferentiated; anaplastic; Grade IV	Liver	8021	Blank(s)	Blank(s)	Blank(s)	Blank(s)	Blank(s)	Blank(s)	Recommended but not performed, unknown reason	Blank(s)	Blank(s)	Blank(s)	9	Blank(s)	Blank(s)	Blank(s)	Blank(s)	Blank(s)	Blank(s)	Blank(s)	Blank(s)	Blank(s)	Complete dates are available and there are more than 0 days of survival	Liver	1250	851	883	1288	861	1250	1179	819	0	1975	Blank(s)	Blank(s)	Blank(s)	Dead
65-69 years	White	Male	Positive histology	Unknown	Liver	8170	Blank(s)	Blank(s)	Blank(s)	Blank(s)	Blank(s)	Blank(s)	Recommended but not performed, unknown reason	Blank(s)	Blank(s)	Blank(s)	9	Blank(s)	Blank(s)	Blank(s)	Blank(s)	Blank(s)	Blank(s)	Blank(s)	Blank(s)	Blank(s)	Complete dates are available and there are more than 0 days of survival	Liver	797	484	467	759	477	760	695	453	4	1979	Blank(s)	Blank(s)	Blank(s)	Dead
45-49 years	White	Female	Positive histology	Unknown	Liver	8170	Blank(s)	Blank(s)	Blank(s)	Blank(s)	Blank(s)	Blank(s)	Recommended but not performed, unknown reason	Blank(s)	Blank(s)	Blank(s)	9	Blank(s)	Blank(s)	Blank(s)	Blank(s)	Blank(s)	Blank(s)	Blank(s)	Blank(s)	Blank(s)	Incomplete dates are available and there cannot be zero days of follow-up	Liver	1250	851	883	1288	861	1250	1179	819	2	1976	Blank(s)	Blank(s)	Blank(s)	Dead
85+ years	White	Female	Positive histology	Poorly differentiated; Grade III	Liver	8010	Blank(s)	Blank(s)	Blank(s)	Blank(s)	Blank(s)	Blank(s)	Recommended but not performed, unknown reason	Blank(s)	Blank(s)	Blank(s)	9	Blank(s)	Blank(s)	Blank(s)	Blank(s)	Blank(s)	Blank(s)	Blank(s)	Blank(s)	Blank(s)	Complete dates are available and there are more than 0 days of survival	Liver	1324	776	784	1328	817	1346	1230	761	1	1981	Blank(s)	Blank(s)	Blank(s)	Dead
85+ years	White	Female	Unknown	Unknown	Liver	8010	Blank(s)	Blank(s)	Blank(s)	Blank(s)	Blank(s)	Blank(s)	Unknown; death certificate; or autopsy only (2003+)	Blank(s)	Blank(s)	Blank(s)	9	Blank(s)	Blank(s)	Blank(s)	Blank(s)	Blank(s)	Blank(s)	Blank(s)	Blank(s)	Blank(s)	Not calculated because a Death Certificate Only or Autopsy Only case	Intrahepatic Bile Duct	1250	851	883	1288	861	1250	1179	819	Unknown	1979	Blank(s)	Blank(s)	Blank(s)	Dead
60-64 years	White	Male	Positive histology	Unknown	BileDuctsIntraHepat	8180	Blank(s)	Blank(s)	Blank(s)	Blank(s)	Blank(s)	Blank(s)	Recommended but not performed, unknown reason	Blank(s)	Blank(s)	Blank(s)	9	Blank(s)	Blank(s)	Blank(s)	Blank(s)	Blank(s)	Blank(s)	Blank(s)	Blank(s)	Blank(s)	Complete dates are available and there are more than 0 days of survival	Chronic Liver Disease and Cirrhosis	1324	776	784	1328	817	1346	1230	761	0	1979	Blank(s)	Blank(s)	Blank(s)	Dead
60-64 years	Other (American Indian/AK Native, Asian/Pacific Islander)	Male	Positive histology	Unknown	Liver	8170	Blank(s)	Blank(s)	Blank(s)	Blank(s)	Blank(s)	Blank(s)	Recommended but not performed, unknown reason	Blank(s)	Blank(s)	Blank(s)	9	Blank(s)	Blank(s)	Blank(s)	Blank(s)	Blank(s)	Blank(s)	Blank(s)	Blank(s)	Blank(s)	Complete dates are available and there are more than 0 days of survival	Liver	1324	776	784	1328	817	1346	1230	761	0	1979	Blank(s)	Blank(s)	Blank(s)	Dead
75-79 years	White	Male	Positive histology	Unknown	Liver	8170	Blank(s)	Blank(s)	Blank(s)	Blank(s)	Blank(s)	Blank(s)	Recommended but not performed, unknown reason	Blank(s)	Blank(s)	Blank(s)	9	Blank(s)	Blank(s)	Blank(s)	Blank(s)	Blank(s)	Blank(s)	Blank(s)	Blank(s)	Blank(s)	Complete dates are available and there are more than 0 days of survival	Liver	1250	851	883	1288	861	1250	1179	819	4	1977	Blank(s)	Blank(s)	Blank(s)	Dead
65-69 years	Other (American Indian/AK Native, Asian/Pacific Islander)	Male	Positive histology	Undifferentiated; anaplastic; Grade IV	Liver	8170	Blank(s)	Blank(s)	Blank(s)	Blank(s)	Blank(s)	Blank(s)	Recommended but not performed, unknown reason	Blank(s)	Blank(s)	Blank(s)	9	Blank(s)	Blank(s)	Blank(s)	Blank(s)	Blank(s)	Blank(s)	Blank(s)	Blank(s)	Blank(s)	Complete dates are available and there are more than 0 days of survival	Liver	1250	851	883	1288	861	1250	1179	819	4	1980	Blank(s)	Blank(s)	Blank(s)	Dead
80-84 years	White	Female	Unknown	Unknown	Liver	8010	Blank(s)	Blank(s)	Blank(s)	Blank(s)	Blank(s)	Blank(s)	Unknown; death certificate; or autopsy only (2003+)	Blank(s)	Blank(s)	Blank(s)	9	Blank(s)	Blank(s)	Blank(s)	Blank(s)	Blank(s)	Blank(s)	Blank(s)	Blank(s)	Blank(s)	Not calculated because a Death Certificate Only or Autopsy Only case	Liver	1250	851	883	1288	861	1250	1179	819	Unknown	1979	Blank(s)	Blank(s)	Blank(s)	Dead
70-74 years	Other (American Indian/AK Native, Asian/Pacific Islander)	Male	Positive histology	Unknown	Liver	8170	Blank(s)	Blank(s)	Blank(s)	Blank(s)	Blank(s)	Blank(s)	Recommended but not performed, unknown reason	Blank(s)	Blank(s)	Blank(s)	9	Blank(s)	Blank(s)	Blank(s)	Blank(s)	Blank(s)	Blank(s)	Blank(s)	Blank(s)	Blank(s)	Complete dates are available and there are more than 0 days of survival	Liver	1250	851	883	1288	861	1250	1179	819	0	1976	Blank(s)	Blank(s)	Blank(s)	Dead
60-64 years	Other (American Indian/AK Native, Asian/Pacific Islander)	Female	Radiography without microscopic confirm	Unknown	Liver	8170	Blank(s)	Blank(s)	Blank(s)	Blank(s)	Blank(s)	Blank(s)	Recommended but not performed, unknown reason	Blank(s)	Blank(s)	Blank(s)	9	Blank(s)	Blank(s)	Blank(s)	Blank(s)	Blank(s)	Blank(s)	Blank(s)	Blank(s)	Blank(s)	Complete dates are available and there are more than 0 days of survival	Liver	1324	776	784	1328	817	1346	1230	761	0	1979	Blank(s)	Blank(s)	Blank(s)	Dead
65-69 years	White	Female	Positive histology	Unknown	Liver	8170	Blank(s)	Blank(s)	Blank(s)	Blank(s)	Blank(s)	Blank(s)	Recommended but not performed, unknown reason	Blank(s)	Blank(s)	Blank(s)	9	Blank(s)	Blank(s)	Blank(s)	Blank(s)	Blank(s)	Blank(s)	Blank(s)	Blank(s)	Blank(s)	Complete dates are available and there are more than 0 days of survival	Chronic Liver Disease and Cirrhosis	797	484	467	759	477	760	695	453	0	1976	Blank(s)	Blank(s)	Blank(s)	Dead
00 years	White	Male	Positive histology	Unknown	Liver	8970	Blank(s)	Blank(s)	Blank(s)	Blank(s)	Blank(s)	Blank(s)	Surgery performed	Blank(s)	Blank(s)	Blank(s)	90	Blank(s)	Blank(s)	Blank(s)	Blank(s)	Blank(s)	Blank(s)	Blank(s)	Blank(s)	Blank(s)	Complete dates are available and there are more than 0 days of survival	Alive	1250	851	883	1288	861	1250	1179	819	480	1976	Blank(s)	Blank(s)	Blank(s)	Alive
55-59 years	White	Male	Positive histology	Unknown	Liver	8170	Blank(s)	Blank(s)	Blank(s)	Blank(s)	Blank(s)	Blank(s)	Recommended but not performed, unknown reason	Blank(s)	Blank(s)	Blank(s)	9	Blank(s)	Blank(s)	Blank(s)	Blank(s)	Blank(s)	Blank(s)	Blank(s)	Blank(s)	Blank(s)	Complete dates are available and there are more than 0 days of survival	Liver	1324	776	784	1328	817	1346	1230	761	0	1979	Blank(s)	Blank(s)	Blank(s)	Dead
80-84 years	White	Female	Positive histology	Unknown	Liver	8246	Blank(s)	Blank(s)	88	0	Blank(s)	Blank(s)	Not recommended	0	0	0	Blank(s)	Blank(s)	0	Blank(s)	Blank(s)	Blank(s)	Blank(s)	Blank(s)	Blank(s)	Blank(s)	Complete dates are available and there are more than 0 days of survival	Liver	1085	781	766	1065	760	1053	988	715	1	2000	Blank(s)	Blank(s)	Blank(s)	Dead
55-59 years	White	Male	Positive histology	Unknown	Liver	8170	Blank(s)	Blank(s)	Blank(s)	Blank(s)	Blank(s)	Blank(s)	Recommended but not performed, unknown reason	Blank(s)	Blank(s)	Blank(s)	9	Blank(s)	Blank(s)	Blank(s)	Blank(s)	Blank(s)	Blank(s)	Blank(s)	Blank(s)	Blank(s)	Complete dates are available and there are more than 0 days of survival	Miscellaneous Malignant Cancer	1085	781	766	1065	760	1053	988	715	0	1979	Blank(s)	Blank(s)	Blank(s)	Dead
60-64 years	White	Female	Positive histology	Unknown	Liver	8000	Blank(s)	Blank(s)	Blank(s)	Blank(s)	Blank(s)	Blank(s)	Not recommended, contraindicated due to other cond; autopsy only (1973-2002)	Blank(s)	Blank(s)	Blank(s)	0	Blank(s)	Blank(s)	Blank(s)	Blank(s)	Blank(s)	Blank(s)	Blank(s)	Blank(s)	Blank(s)	Not calculated because a Death Certificate Only or Autopsy Only case	Liver	1085	781	766	1065	760	1053	988	715	Unknown	1975	Blank(s)	Blank(s)	Blank(s)	Dead
45-49 years	Other (American Indian/AK Native, Asian/Pacific Islander)	Male	Positive histology	Unknown	Liver	8170	Blank(s)	Blank(s)	Blank(s)	Blank(s)	Blank(s)	Blank(s)	Recommended but not performed, unknown reason	Blank(s)	Blank(s)	Blank(s)	9	Blank(s)	Blank(s)	Blank(s)	Blank(s)	Blank(s)	Blank(s)	Blank(s)	Blank(s)	Blank(s)	Incomplete dates are available and there cannot be zero days of follow-up	Liver	1324	776	784	1328	817	1346	1230	761	4	1980	Blank(s)	Blank(s)	Blank(s)	Dead
70-74 years	Other (American Indian/AK Native, Asian/Pacific Islander)	Female	Positive histology	Unknown	Liver	8170	Blank(s)	Blank(s)	Blank(s)	Blank(s)	Blank(s)	Blank(s)	Recommended but not performed, unknown reason	Blank(s)	Blank(s)	Blank(s)	9	Blank(s)	Blank(s)	Blank(s)	Blank(s)	Blank(s)	Blank(s)	Blank(s)	Blank(s)	Blank(s)	Complete dates are available and there are more than 0 days of survival	Liver	1324	776	784	1328	817	1346	1230	761	1	1978	Blank(s)	Blank(s)	Blank(s)	Dead
75-79 years	White	Male	Positive histology	Unknown	Liver	8170	Blank(s)	Blank(s)	Blank(s)	Blank(s)	Blank(s)	Blank(s)	Recommended but not performed, unknown reason	Blank(s)	Blank(s)	Blank(s)	9	Blank(s)	Blank(s)	Blank(s)	Blank(s)	Blank(s)	Blank(s)	Blank(s)	Blank(s)	Blank(s)	Incomplete dates are available and there cannot be zero days of follow-up	Liver	1324	776	784	1328	817	1346	1230	761	1	1979	Blank(s)	Blank(s)	Blank(s)	Dead
55-59 years	White	Female	Positive histology	Unknown	Liver	8170	Blank(s)	Blank(s)	Blank(s)	Blank(s)	Blank(s)	Blank(s)	Recommended but not performed, unknown reason	Blank(s)	Blank(s)	Blank(s)	9	Blank(s)	Blank(s)	Blank(s)	Blank(s)	Blank(s)	Blank(s)	Blank(s)	Blank(s)	Blank(s)	Complete dates are available and there are more than 0 days of survival	Liver	1250	851	883	1288	861	1250	1179	819	6	1979	Blank(s)	Blank(s)	Blank(s)	Dead
80-84 years	White	Female	Positive histology	Undifferentiated; anaplastic; Grade IV	Liver	8000	Blank(s)	Blank(s)	Blank(s)	Blank(s)	Blank(s)	Blank(s)	Recommended but not performed, unknown reason	Blank(s)	Blank(s)	Blank(s)	9	Blank(s)	Blank(s)	Blank(s)	Blank(s)	Blank(s)	Blank(s)	Blank(s)	Blank(s)	Blank(s)	Complete dates are available and there are more than 0 days of survival	Miscellaneous Malignant Cancer	1085	781	766	1065	760	1053	988	715	2	1984	Blank(s)	Blank(s)	Blank(s)	Dead
85+ years	White	Female	Clinical diagnosis only	Unknown	Liver	8010	Blank(s)	Blank(s)	Blank(s)	Blank(s)	Blank(s)	Blank(s)	Recommended but not performed, unknown reason	Blank(s)	Blank(s)	Blank(s)	9	Blank(s)	Blank(s)	Blank(s)	Blank(s)	Blank(s)	Blank(s)	Blank(s)	Blank(s)	Blank(s)	Complete dates are available and there are more than 0 days of survival	Liver	1250	851	883	1288	861	1250	1179	819	0	1979	Blank(s)	Blank(s)	Blank(s)	Dead
60-64 years	White	Male	Positive histology	Unknown	Liver	8170	Blank(s)	Blank(s)	Blank(s)	Blank(s)	Blank(s)	Blank(s)	Recommended but not performed, unknown reason	Blank(s)	Blank(s)	Blank(s)	9	Blank(s)	Blank(s)	Blank(s)	Blank(s)	Blank(s)	Blank(s)	Blank(s)	Blank(s)	Blank(s)	Complete dates are available and there are more than 0 days of survival	Liver	1324	776	784	1328	817	1346	1230	761	1	1979	Blank(s)	Blank(s)	Blank(s)	Dead
50-54 years	Other (American Indian/AK Native, Asian/Pacific Islander)	Male	Positive histology	Unknown	Liver	8170	Blank(s)	Blank(s)	Blank(s)	Blank(s)	Blank(s)	Blank(s)	Recommended but not performed, unknown reason	Blank(s)	Blank(s)	Blank(s)	9	Blank(s)	Blank(s)	Blank(s)	Blank(s)	Blank(s)	Blank(s)	Blank(s)	Blank(s)	Blank(s)	Complete dates are available and there are more than 0 days of survival	Liver	1324	776	784	1328	817	1346	1230	761	1	1978	Blank(s)	Blank(s)	Blank(s)	Dead
65-69 years	White	Male	Unknown	Unknown	Liver	8010	Blank(s)	Blank(s)	Blank(s)	Blank(s)	Blank(s)	Blank(s)	Unknown; death certificate; or autopsy only (2003+)	Blank(s)	Blank(s)	Blank(s)	9	Blank(s)	Blank(s)	Blank(s)	Blank(s)	Blank(s)	Blank(s)	Blank(s)	Blank(s)	Blank(s)	Not calculated because a Death Certificate Only or Autopsy Only case	Liver	833	495	534	878	444	774	723	419	Unknown	1979	Blank(s)	Blank(s)	Blank(s)	Dead
65-69 years	White	Male	Positive histology	Unknown	Liver	8170	Blank(s)	Blank(s)	Blank(s)	Blank(s)	Blank(s)	Blank(s)	Recommended but not performed, unknown reason	Blank(s)	Blank(s)	Blank(s)	9	Blank(s)	Blank(s)	Blank(s)	Blank(s)	Blank(s)	Blank(s)	Blank(s)	Blank(s)	Blank(s)	Complete dates are available and there are more than 0 days of survival	Chronic Liver Disease and Cirrhosis	1324	776	784	1328	817	1346	1230	761	0	1977	Blank(s)	Blank(s)	Blank(s)	Dead
75-79 years	Black	Male	Unknown	Unknown	Liver	8010	Blank(s)	Blank(s)	Blank(s)	Blank(s)	Blank(s)	Blank(s)	Unknown; death certificate; or autopsy only (2003+)	Blank(s)	Blank(s)	Blank(s)	9	Blank(s)	Blank(s)	Blank(s)	Blank(s)	Blank(s)	Blank(s)	Blank(s)	Blank(s)	Blank(s)	Not calculated because a Death Certificate Only or Autopsy Only case	Liver	1250	851	883	1288	861	1250	1179	819	Unknown	1979	Blank(s)	Blank(s)	Blank(s)	Dead
50-54 years	White	Male	Positive histology	Unknown	Liver	8170	Blank(s)	Blank(s)	Blank(s)	Blank(s)	Blank(s)	Blank(s)	Recommended but not performed, unknown reason	Blank(s)	Blank(s)	Blank(s)	9	Blank(s)	Blank(s)	Blank(s)	Blank(s)	Blank(s)	Blank(s)	Blank(s)	Blank(s)	Blank(s)	Complete dates are available and there are more than 0 days of survival	Liver	1085	781	766	1065	760	1053	988	715	1	1975	Blank(s)	Blank(s)	Blank(s)	Dead
80-84 years	White	Male	Unknown	Unknown	Liver	8010	Blank(s)	Blank(s)	Blank(s)	Blank(s)	Blank(s)	Blank(s)	Unknown; death certificate; or autopsy only (2003+)	Blank(s)	Blank(s)	Blank(s)	9	Blank(s)	Blank(s)	Blank(s)	Blank(s)	Blank(s)	Blank(s)	Blank(s)	Blank(s)	Blank(s)	Not calculated because a Death Certificate Only or Autopsy Only case	Liver	1250	851	883	1288	861	1250	1179	819	Unknown	1979	Blank(s)	Blank(s)	Blank(s)	Dead
60-64 years	White	Male	Positive histology	Unknown	Liver	8170	Blank(s)	Blank(s)	Blank(s)	Blank(s)	Blank(s)	Blank(s)	Not recommended, contraindicated due to other cond; autopsy only (1973-2002)	Blank(s)	Blank(s)	Blank(s)	0	Blank(s)	Blank(s)	Blank(s)	Blank(s)	Blank(s)	Blank(s)	Blank(s)	Blank(s)	Blank(s)	Not calculated because a Death Certificate Only or Autopsy Only case	Liver	1085	781	766	1065	760	1053	988	715	Unknown	1979	Blank(s)	Blank(s)	Blank(s)	Dead
80-84 years	White	Female	Unknown	Unknown	Liver	8170	Blank(s)	Blank(s)	Blank(s)	Blank(s)	Blank(s)	Blank(s)	Unknown; death certificate; or autopsy only (2003+)	Blank(s)	Blank(s)	Blank(s)	9	Blank(s)	Blank(s)	Blank(s)	Blank(s)	Blank(s)	Blank(s)	Blank(s)	Blank(s)	Blank(s)	Not calculated because a Death Certificate Only or Autopsy Only case	Liver	1324	776	784	1328	817	1346	1230	761	Unknown	1976	Blank(s)	Blank(s)	Blank(s)	Dead
45-49 years	White	Male	Positive histology	Well differentiated; Grade I	Liver	8170	Blank(s)	Blank(s)	Blank(s)	Blank(s)	Blank(s)	Blank(s)	Recommended but not performed, unknown reason	Blank(s)	Blank(s)	Blank(s)	9	Blank(s)	Blank(s)	Blank(s)	Blank(s)	Blank(s)	Blank(s)	Blank(s)	Blank(s)	Blank(s)	Complete dates are available and there are more than 0 days of survival	Liver	1085	781	766	1065	760	1053	988	715	0	1975	Blank(s)	Blank(s)	Blank(s)	Dead
65-69 years	White	Male	Radiography without microscopic confirm	Unknown	Liver	8010	Blank(s)	Blank(s)	Blank(s)	Blank(s)	Blank(s)	Blank(s)	Recommended but not performed, unknown reason	Blank(s)	Blank(s)	Blank(s)	9	Blank(s)	Blank(s)	Blank(s)	Blank(s)	Blank(s)	Blank(s)	Blank(s)	Blank(s)	Blank(s)	Complete dates are available and there are more than 0 days of survival	Liver	1085	781	766	1065	760	1053	988	715	0	1977	Blank(s)	Blank(s)	Blank(s)	Dead
60-64 years	White	Male	Positive histology	Unknown	Liver	8170	Blank(s)	Blank(s)	Blank(s)	Blank(s)	Blank(s)	Blank(s)	Recommended but not performed, unknown reason	Blank(s)	Blank(s)	Blank(s)	9	Blank(s)	Blank(s)	Blank(s)	Blank(s)	Blank(s)	Blank(s)	Blank(s)	Blank(s)	Blank(s)	Complete dates are available and there are more than 0 days of survival	Liver	833	495	534	878	444	774	723	419	0	1975	Blank(s)	Blank(s)	Blank(s)	Dead
70-74 years	Other (American Indian/AK Native, Asian/Pacific Islander)	Male	Positive histology	Moderately differentiated; Grade II	Liver	8170	Blank(s)	Blank(s)	Blank(s)	Blank(s)	Blank(s)	Blank(s)	Recommended but not performed, unknown reason	Blank(s)	Blank(s)	Blank(s)	9	Blank(s)	Blank(s)	Blank(s)	Blank(s)	Blank(s)	Blank(s)	Blank(s)	Blank(s)	Blank(s)	Complete dates are available and there are more than 0 days of survival	Liver	1324	776	784	1328	817	1346	1230	761	8	1979	Blank(s)	Blank(s)	Blank(s)	Dead
75-79 years	White	Male	Positive histology	Unknown	Liver	8170	Blank(s)	Blank(s)	Blank(s)	Blank(s)	Blank(s)	Blank(s)	Recommended but not performed, unknown reason	Blank(s)	Blank(s)	Blank(s)	9	Blank(s)	Blank(s)	Blank(s)	Blank(s)	Blank(s)	Blank(s)	Blank(s)	Blank(s)	Blank(s)	Complete dates are available and there are more than 0 days of survival	Liver	833	495	534	878	444	774	723	419	0	1981	Blank(s)	Blank(s)	Blank(s)	Dead
75-79 years	Other (American Indian/AK Native, Asian/Pacific Islander)	Male	Positive histology	Moderately differentiated; Grade II	Liver	8170	II	II	Blank(s)	0	None	None; diagnosed at autopsy	Not recommended	Blank(s)	Blank(s)	Blank(s)	Blank(s)	Blank(s)	0	40	390	0	0	0	10	1	Complete dates are available and there are more than 0 days of survival	Liver	1250	851	883	1288	861	1250	1179	819	15	2014	T2	N0	M0	Dead
70-74 years	White	Male	Positive histology	Well differentiated; Grade I	Liver	8170	Blank(s)	Blank(s)	Blank(s)	Blank(s)	Blank(s)	Blank(s)	Recommended but not performed, unknown reason	Blank(s)	Blank(s)	Blank(s)	9	Blank(s)	Blank(s)	Blank(s)	Blank(s)	Blank(s)	Blank(s)	Blank(s)	Blank(s)	Blank(s)	Complete dates are available and there are more than 0 days of survival	Liver	1085	781	766	1065	760	1053	988	715	2	1975	Blank(s)	Blank(s)	Blank(s)	Dead
55-59 years	White	Female	Positive histology	Unknown	Liver	8170	Blank(s)	Blank(s)	Blank(s)	Blank(s)	Blank(s)	Blank(s)	Recommended but not performed, unknown reason	Blank(s)	Blank(s)	Blank(s)	9	Blank(s)	Blank(s)	Blank(s)	Blank(s)	Blank(s)	Blank(s)	Blank(s)	Blank(s)	Blank(s)	Incomplete dates are available and there cannot be zero days of follow-up	Liver	797	484	467	759	477	760	695	453	4	1975	Blank(s)	Blank(s)	Blank(s)	Dead
60-64 years	White	Female	Positive histology	Unknown	Liver	8170	Blank(s)	Blank(s)	Blank(s)	Blank(s)	Blank(s)	Blank(s)	Surgery performed	Blank(s)	Blank(s)	Blank(s)	90	Blank(s)	Blank(s)	Blank(s)	Blank(s)	Blank(s)	Blank(s)	Blank(s)	Blank(s)	Blank(s)	Complete dates are available and there are more than 0 days of survival	State DC not available or state DC available but no COD	1324	776	784	1328	817	1346	1230	761	203	1975	Blank(s)	Blank(s)	Blank(s)	Dead
50-54 years	Other (American Indian/AK Native, Asian/Pacific Islander)	Male	Positive histology	Undifferentiated; anaplastic; Grade IV	Liver	8020	Blank(s)	Blank(s)	Blank(s)	Blank(s)	Blank(s)	Blank(s)	Recommended but not performed, unknown reason	Blank(s)	Blank(s)	Blank(s)	9	Blank(s)	Blank(s)	Blank(s)	Blank(s)	Blank(s)	Blank(s)	Blank(s)	Blank(s)	Blank(s)	Complete dates are available and there are more than 0 days of survival	Liver	1324	776	784	1328	817	1346	1230	761	13	1976	Blank(s)	Blank(s)	Blank(s)	Dead
60-64 years	Other (American Indian/AK Native, Asian/Pacific Islander)	Male	Radiography without microscopic confirm	Unknown	Liver	8170	Blank(s)	Blank(s)	Blank(s)	Blank(s)	Blank(s)	Blank(s)	Recommended but not performed, unknown reason	Blank(s)	Blank(s)	Blank(s)	9	Blank(s)	Blank(s)	Blank(s)	Blank(s)	Blank(s)	Blank(s)	Blank(s)	Blank(s)	Blank(s)	Complete dates are available and there are more than 0 days of survival	Liver	1250	851	883	1288	861	1250	1179	819	4	1979	Blank(s)	Blank(s)	Blank(s)	Dead
70-74 years	White	Male	Positive exfoliative cytology, no positive histology	Unknown	Liver	8170	Blank(s)	Blank(s)	88	Blank(s)	Blank(s)	Blank(s)	Not recommended	Blank(s)	Blank(s)	Blank(s)	0	Blank(s)	0	Blank(s)	Blank(s)	Blank(s)	Blank(s)	Blank(s)	Blank(s)	Blank(s)	Complete dates are available and there are more than 0 days of survival	Liver	1250	851	883	1288	861	1250	1179	819	1	1997	Blank(s)	Blank(s)	Blank(s)	Dead
30-34 years	Other (American Indian/AK Native, Asian/Pacific Islander)	Female	Positive histology	Unknown	Liver	8170	Blank(s)	Blank(s)	Blank(s)	Blank(s)	Blank(s)	Blank(s)	Surgery performed	Blank(s)	Blank(s)	Blank(s)	90	Blank(s)	Blank(s)	Blank(s)	Blank(s)	Blank(s)	Blank(s)	Blank(s)	Blank(s)	Blank(s)	Complete dates are available and there are more than 0 days of survival	Alive	797	484	467	759	477	760	695	453	451	1979	Blank(s)	Blank(s)	Blank(s)	Alive
50-54 years	White	Male	Positive histology	Unknown	Liver	8170	Blank(s)	Blank(s)	Blank(s)	Blank(s)	Blank(s)	Blank(s)	Recommended but not performed, unknown reason	Blank(s)	Blank(s)	Blank(s)	9	Blank(s)	Blank(s)	Blank(s)	Blank(s)	Blank(s)	Blank(s)	Blank(s)	Blank(s)	Blank(s)	Complete dates are available and there are more than 0 days of survival	Miscellaneous Malignant Cancer	1085	781	766	1065	760	1053	988	715	1	1978	Blank(s)	Blank(s)	Blank(s)	Dead
85+ years	Black	Female	Positive histology	Undifferentiated; anaplastic; Grade IV	Liver	8140	Blank(s)	Blank(s)	Blank(s)	Blank(s)	Blank(s)	Blank(s)	Recommended but not performed, unknown reason	Blank(s)	Blank(s)	Blank(s)	9	Blank(s)	Blank(s)	Blank(s)	Blank(s)	Blank(s)	Blank(s)	Blank(s)	Blank(s)	Blank(s)	Complete dates are available and there are more than 0 days of survival	Liver	1250	851	883	1288	861	1250	1179	819	1	1981	Blank(s)	Blank(s)	Blank(s)	Dead
55-59 years	White	Male	Positive histology	Poorly differentiated; Grade III	Liver	8170	Blank(s)	Blank(s)	Blank(s)	Blank(s)	Blank(s)	Blank(s)	Recommended but not performed, unknown reason	Blank(s)	Blank(s)	Blank(s)	9	Blank(s)	Blank(s)	Blank(s)	Blank(s)	Blank(s)	Blank(s)	Blank(s)	Blank(s)	Blank(s)	Complete dates are available and there are more than 0 days of survival	Other Cause of Death	797	484	467	759	477	760	695	453	4	1980	Blank(s)	Blank(s)	Blank(s)	Dead
65-69 years	White	Male	Positive histology	Unknown	Liver	8170	Blank(s)	Blank(s)	Blank(s)	Blank(s)	Blank(s)	Blank(s)	Recommended but not performed, unknown reason	Blank(s)	Blank(s)	Blank(s)	9	Blank(s)	Blank(s)	Blank(s)	Blank(s)	Blank(s)	Blank(s)	Blank(s)	Blank(s)	Blank(s)	Complete dates are available and there are more than 0 days of survival	Liver	1324	776	784	1328	817	1346	1230	761	1	1982	Blank(s)	Blank(s)	Blank(s)	Dead
75-79 years	Other (American Indian/AK Native, Asian/Pacific Islander)	Male	Positive histology	Unknown	Liver	8170	Blank(s)	Blank(s)	Blank(s)	Blank(s)	Blank(s)	Blank(s)	Recommended but not performed, unknown reason	Blank(s)	Blank(s)	Blank(s)	9	Blank(s)	Blank(s)	Blank(s)	Blank(s)	Blank(s)	Blank(s)	Blank(s)	Blank(s)	Blank(s)	Complete dates are available and there are more than 0 days of survival	Liver	1324	776	784	1328	817	1346	1230	761	0	1982	Blank(s)	Blank(s)	Blank(s)	Dead
70-74 years	Other (American Indian/AK Native, Asian/Pacific Islander)	Male	Positive histology	Unknown	Liver	8170	Blank(s)	Blank(s)	Blank(s)	Blank(s)	Blank(s)	Blank(s)	Recommended but not performed, unknown reason	Blank(s)	Blank(s)	Blank(s)	9	Blank(s)	Blank(s)	Blank(s)	Blank(s)	Blank(s)	Blank(s)	Blank(s)	Blank(s)	Blank(s)	Complete dates are available and there are more than 0 days of survival	Liver	1250	851	883	1288	861	1250	1179	819	1	1984	Blank(s)	Blank(s)	Blank(s)	Dead
30-34 years	Other (American Indian/AK Native, Asian/Pacific Islander)	Female	Positive histology	Unknown	Liver	8170	Blank(s)	Blank(s)	Blank(s)	Blank(s)	Blank(s)	Blank(s)	Surgery performed	Blank(s)	Blank(s)	Blank(s)	90	Blank(s)	Blank(s)	Blank(s)	Blank(s)	Blank(s)	Blank(s)	Blank(s)	Blank(s)	Blank(s)	Complete dates are available and there are more than 0 days of survival	Liver	1085	781	766	1065	760	1053	988	715	6	1984	Blank(s)	Blank(s)	Blank(s)	Dead
01-04 years	White	Male	Positive histology	Unknown	Liver	8970	Blank(s)	Blank(s)	Blank(s)	Blank(s)	Blank(s)	Blank(s)	Recommended but not performed, unknown reason	Blank(s)	Blank(s)	Blank(s)	9	Blank(s)	Blank(s)	Blank(s)	Blank(s)	Blank(s)	Blank(s)	Blank(s)	Blank(s)	Blank(s)	Complete dates are available and there are more than 0 days of survival	In situ, benign or unknown behavior neoplasm	1085	781	766	1065	760	1053	988	715	0	1983	Blank(s)	Blank(s)	Blank(s)	Dead
75-79 years	Black	Male	Positive histology	Unknown	Liver	8170	Blank(s)	Blank(s)	Blank(s)	Blank(s)	Blank(s)	Blank(s)	Recommended but not performed, unknown reason	Blank(s)	Blank(s)	Blank(s)	9	Blank(s)	Blank(s)	Blank(s)	Blank(s)	Blank(s)	Blank(s)	Blank(s)	Blank(s)	Blank(s)	Complete dates are available and there are more than 0 days of survival	State DC not available or state DC available but no COD	1085	781	766	1065	760	1053	988	715	3	1986	Blank(s)	Blank(s)	Blank(s)	Dead
60-64 years	Other (American Indian/AK Native, Asian/Pacific Islander)	Female	Positive histology	Unknown	Liver	8170	Blank(s)	Blank(s)	Blank(s)	Blank(s)	Blank(s)	Blank(s)	Recommended but not performed, unknown reason	Blank(s)	Blank(s)	Blank(s)	9	Blank(s)	Blank(s)	Blank(s)	Blank(s)	Blank(s)	Blank(s)	Blank(s)	Blank(s)	Blank(s)	Complete dates are available and there are more than 0 days of survival	Liver	1085	781	766	1065	760	1053	988	715	4	1982	Blank(s)	Blank(s)	Blank(s)	Dead
75-79 years	White	Female	Positive histology	Unknown	Liver	8170	Blank(s)	Blank(s)	Blank(s)	Blank(s)	Blank(s)	Blank(s)	Recommended but not performed, unknown reason	Blank(s)	Blank(s)	Blank(s)	9	Blank(s)	Blank(s)	Blank(s)	Blank(s)	Blank(s)	Blank(s)	Blank(s)	Blank(s)	Blank(s)	Complete dates are available and there are more than 0 days of survival	Liver	1250	851	883	1288	861	1250	1179	819	0	1986	Blank(s)	Blank(s)	Blank(s)	Dead
75-79 years	Other (American Indian/AK Native, Asian/Pacific Islander)	Male	Radiography without microscopic confirm	Unknown	Liver	8170	Blank(s)	Blank(s)	Blank(s)	Blank(s)	Blank(s)	Blank(s)	Recommended but not performed, unknown reason	Blank(s)	Blank(s)	Blank(s)	9	Blank(s)	Blank(s)	Blank(s)	Blank(s)	Blank(s)	Blank(s)	Blank(s)	Blank(s)	Blank(s)	Complete dates are available and there are more than 0 days of survival	Liver	1324	776	784	1328	817	1346	1230	761	1	1984	Blank(s)	Blank(s)	Blank(s)	Dead
75-79 years	Other (American Indian/AK Native, Asian/Pacific Islander)	Female	Positive histology	Unknown	Liver	8480	Blank(s)	Blank(s)	Blank(s)	Blank(s)	Blank(s)	Blank(s)	Recommended but not performed, unknown reason	Blank(s)	Blank(s)	Blank(s)	9	Blank(s)	Blank(s)	Blank(s)	Blank(s)	Blank(s)	Blank(s)	Blank(s)	Blank(s)	Blank(s)	Complete dates are available and there are more than 0 days of survival	In situ, benign or unknown behavior neoplasm	1324	776	784	1328	817	1346	1230	761	3	1984	Blank(s)	Blank(s)	Blank(s)	Dead
70-74 years	White	Male	Positive histology	Unknown	Liver	8170	Blank(s)	Blank(s)	Blank(s)	Blank(s)	Blank(s)	Blank(s)	Recommended but not performed, unknown reason	Blank(s)	Blank(s)	Blank(s)	9	Blank(s)	Blank(s)	Blank(s)	Blank(s)	Blank(s)	Blank(s)	Blank(s)	Blank(s)	Blank(s)	Complete dates are available and there are more than 0 days of survival	Liver	1324	776	784	1328	817	1346	1230	761	0	1987	Blank(s)	Blank(s)	Blank(s)	Dead
60-64 years	White	Female	Positive histology	Unknown	Liver	8170	Blank(s)	Blank(s)	Blank(s)	Blank(s)	Blank(s)	Blank(s)	Recommended but not performed, unknown reason	Blank(s)	Blank(s)	Blank(s)	9	Blank(s)	Blank(s)	Blank(s)	Blank(s)	Blank(s)	Blank(s)	Blank(s)	Blank(s)	Blank(s)	Complete dates are available and there are more than 0 days of survival	Liver	1324	776	784	1328	817	1346	1230	761	2	1981	Blank(s)	Blank(s)	Blank(s)	Dead
80-84 years	White	Female	Positive histology	Unknown	Liver	8170	Blank(s)	Blank(s)	Blank(s)	Blank(s)	Blank(s)	Blank(s)	Recommended but not performed, unknown reason	Blank(s)	Blank(s)	Blank(s)	9	Blank(s)	Blank(s)	Blank(s)	Blank(s)	Blank(s)	Blank(s)	Blank(s)	Blank(s)	Blank(s)	Complete dates are available and there are more than 0 days of survival	Liver	1085	781	766	1065	760	1053	988	715	7	1987	Blank(s)	Blank(s)	Blank(s)	Dead
85+ years	White	Male	Positive histology	Unknown	Liver	8010	Blank(s)	Blank(s)	Blank(s)	Blank(s)	Blank(s)	Blank(s)	Recommended but not performed, unknown reason	Blank(s)	Blank(s)	Blank(s)	9	Blank(s)	Blank(s)	Blank(s)	Blank(s)	Blank(s)	Blank(s)	Blank(s)	Blank(s)	Blank(s)	Complete dates are available and there are more than 0 days of survival	Liver	797	484	467	759	477	760	695	453	0	1982	Blank(s)	Blank(s)	Blank(s)	Dead
70-74 years	White	Female	Positive histology	Poorly differentiated; Grade III	Liver	8170	Blank(s)	Blank(s)	Blank(s)	Blank(s)	Blank(s)	Blank(s)	Recommended but not performed, unknown reason	Blank(s)	Blank(s)	Blank(s)	9	Blank(s)	Blank(s)	Blank(s)	Blank(s)	Blank(s)	Blank(s)	Blank(s)	Blank(s)	Blank(s)	Complete dates are available and there are more than 0 days of survival	Liver	1085	781	766	1065	760	1053	988	715	0	1982	Blank(s)	Blank(s)	Blank(s)	Dead
65-69 years	Other (American Indian/AK Native, Asian/Pacific Islander)	Female	Positive histology	Unknown	Liver	8170	Blank(s)	Blank(s)	Blank(s)	Blank(s)	Blank(s)	Blank(s)	Recommended but not performed, unknown reason	Blank(s)	Blank(s)	Blank(s)	9	Blank(s)	Blank(s)	Blank(s)	Blank(s)	Blank(s)	Blank(s)	Blank(s)	Blank(s)	Blank(s)	Complete dates are available and there are more than 0 days of survival	Liver	1324	776	784	1328	817	1346	1230	761	0	1986	Blank(s)	Blank(s)	Blank(s)	Dead
50-54 years	White	Male	Positive histology	Unknown	Liver	8170	Blank(s)	Blank(s)	Blank(s)	Blank(s)	Blank(s)	Blank(s)	Recommended but not performed, unknown reason	Blank(s)	Blank(s)	Blank(s)	9	Blank(s)	Blank(s)	Blank(s)	Blank(s)	Blank(s)	Blank(s)	Blank(s)	Blank(s)	Blank(s)	Complete dates are available and there are more than 0 days of survival	Liver	797	484	467	759	477	760	695	453	5	1981	Blank(s)	Blank(s)	Blank(s)	Dead
75-79 years	White	Male	Positive histology	Unknown	Liver	8170	Blank(s)	Blank(s)	Blank(s)	Blank(s)	Blank(s)	Blank(s)	Recommended but not performed, unknown reason	Blank(s)	Blank(s)	Blank(s)	9	Blank(s)	Blank(s)	Blank(s)	Blank(s)	Blank(s)	Blank(s)	Blank(s)	Blank(s)	Blank(s)	Complete dates are available and there are more than 0 days of survival	Liver	1324	776	784	1328	817	1346	1230	761	1	1986	Blank(s)	Blank(s)	Blank(s)	Dead
85+ years	White	Male	Positive histology	Poorly differentiated; Grade III	Liver	8170	Blank(s)	Blank(s)	Blank(s)	Blank(s)	Blank(s)	Blank(s)	Recommended but not performed, unknown reason	Blank(s)	Blank(s)	Blank(s)	9	Blank(s)	Blank(s)	Blank(s)	Blank(s)	Blank(s)	Blank(s)	Blank(s)	Blank(s)	Blank(s)	Complete dates are available and there are more than 0 days of survival	Diseases of Heart	797	484	467	759	477	760	695	453	1	1985	Blank(s)	Blank(s)	Blank(s)	Dead
50-54 years	Other (American Indian/AK Native, Asian/Pacific Islander)	Male	Clinical diagnosis only	Unknown	Liver	8170	Blank(s)	Blank(s)	Blank(s)	Blank(s)	Blank(s)	Blank(s)	Recommended but not performed, unknown reason	Blank(s)	Blank(s)	Blank(s)	9	Blank(s)	Blank(s)	Blank(s)	Blank(s)	Blank(s)	Blank(s)	Blank(s)	Blank(s)	Blank(s)	Complete dates are available and there are more than 0 days of survival	Chronic Liver Disease and Cirrhosis	1250	851	883	1288	861	1250	1179	819	3	1985	Blank(s)	Blank(s)	Blank(s)	Dead
85+ years	White	Female	Radiography without microscopic confirm	Unknown	Liver	8010	Blank(s)	Blank(s)	Blank(s)	Blank(s)	Blank(s)	Blank(s)	Recommended but not performed, unknown reason	Blank(s)	Blank(s)	Blank(s)	9	Blank(s)	Blank(s)	Blank(s)	Blank(s)	Blank(s)	Blank(s)	Blank(s)	Blank(s)	Blank(s)	Incomplete dates are available and there cannot be zero days of follow-up	Liver	1324	776	784	1328	817	1346	1230	761	30	1979	Blank(s)	Blank(s)	Blank(s)	Dead
50-54 years	Other (American Indian/AK Native, Asian/Pacific Islander)	Male	Radiography without microscopic confirm	Unknown	Liver	8170	Blank(s)	Blank(s)	Blank(s)	Blank(s)	Blank(s)	Blank(s)	Recommended but not performed, unknown reason	Blank(s)	Blank(s)	Blank(s)	9	Blank(s)	Blank(s)	Blank(s)	Blank(s)	Blank(s)	Blank(s)	Blank(s)	Blank(s)	Blank(s)	Complete dates are available and there are more than 0 days of survival	Miscellaneous Malignant Cancer	1250	851	883	1288	861	1250	1179	819	1	1985	Blank(s)	Blank(s)	Blank(s)	Dead
55-59 years	Black	Female	Positive histology	Unknown	Liver	8170	Blank(s)	Blank(s)	Blank(s)	Blank(s)	Blank(s)	Blank(s)	Recommended but not performed, unknown reason	Blank(s)	Blank(s)	Blank(s)	9	Blank(s)	Blank(s)	Blank(s)	Blank(s)	Blank(s)	Blank(s)	Blank(s)	Blank(s)	Blank(s)	Complete dates are available and there are more than 0 days of survival	Liver	1250	851	883	1288	861	1250	1179	819	0	1985	Blank(s)	Blank(s)	Blank(s)	Dead
70-74 years	White	Female	Radiography without microscopic confirm	Unknown	Liver	8170	Blank(s)	Blank(s)	Blank(s)	Blank(s)	Blank(s)	Blank(s)	Recommended but not performed, unknown reason	Blank(s)	Blank(s)	Blank(s)	9	Blank(s)	Blank(s)	Blank(s)	Blank(s)	Blank(s)	Blank(s)	Blank(s)	Blank(s)	Blank(s)	Complete dates are available and there are more than 0 days of survival	Liver	1324	776	784	1328	817	1346	1230	761	1	1987	Blank(s)	Blank(s)	Blank(s)	Dead
60-64 years	Other (American Indian/AK Native, Asian/Pacific Islander)	Female	Positive histology	Poorly differentiated; Grade III	Liver	8170	Blank(s)	Blank(s)	Blank(s)	Blank(s)	Blank(s)	Blank(s)	Recommended but not performed, unknown reason	Blank(s)	Blank(s)	Blank(s)	9	Blank(s)	Blank(s)	Blank(s)	Blank(s)	Blank(s)	Blank(s)	Blank(s)	Blank(s)	Blank(s)	Complete dates are available and there are more than 0 days of survival	Miscellaneous Malignant Cancer	1324	776	784	1328	817	1346	1230	761	1	1982	Blank(s)	Blank(s)	Blank(s)	Dead
50-54 years	White	Female	Positive histology	Unknown	Liver	8440	Blank(s)	Blank(s)	Blank(s)	Blank(s)	Blank(s)	Blank(s)	Recommended but not performed, unknown reason	Blank(s)	Blank(s)	Blank(s)	9	Blank(s)	Blank(s)	Blank(s)	Blank(s)	Blank(s)	Blank(s)	Blank(s)	Blank(s)	Blank(s)	Complete dates are available and there are more than 0 days of survival	Liver	797	484	467	759	477	760	695	453	6	1980	Blank(s)	Blank(s)	Blank(s)	Dead
70-74 years	White	Male	Positive histology	Poorly differentiated; Grade III	Liver	8140	Blank(s)	Blank(s)	Blank(s)	Blank(s)	Blank(s)	Blank(s)	Recommended but not performed, unknown reason	Blank(s)	Blank(s)	Blank(s)	9	Blank(s)	Blank(s)	Blank(s)	Blank(s)	Blank(s)	Blank(s)	Blank(s)	Blank(s)	Blank(s)	Complete dates are available and there are more than 0 days of survival	Liver	797	484	467	759	477	760	695	453	0	1984	Blank(s)	Blank(s)	Blank(s)	Dead
45-49 years	Other (American Indian/AK Native, Asian/Pacific Islander)	Male	Positive histology	Unknown	Liver	8170	Blank(s)	Blank(s)	Blank(s)	Blank(s)	Blank(s)	Blank(s)	Recommended but not performed, unknown reason	Blank(s)	Blank(s)	Blank(s)	9	Blank(s)	Blank(s)	Blank(s)	Blank(s)	Blank(s)	Blank(s)	Blank(s)	Blank(s)	Blank(s)	Complete dates are available and there are more than 0 days of survival	Liver	1324	776	784	1328	817	1346	1230	761	2	1984	Blank(s)	Blank(s)	Blank(s)	Dead
75-79 years	White	Male	Positive histology	Poorly differentiated; Grade III	Liver	8170	Blank(s)	Blank(s)	Blank(s)	Blank(s)	Blank(s)	Blank(s)	Recommended but not performed, unknown reason	Blank(s)	Blank(s)	Blank(s)	9	Blank(s)	Blank(s)	Blank(s)	Blank(s)	Blank(s)	Blank(s)	Blank(s)	Blank(s)	Blank(s)	Complete dates are available and there are more than 0 days of survival	Liver	833	495	534	878	444	774	723	419	0	1984	Blank(s)	Blank(s)	Blank(s)	Dead
85+ years	White	Male	Radiography without microscopic confirm	Unknown	Liver	8170	Blank(s)	Blank(s)	Blank(s)	Blank(s)	Blank(s)	Blank(s)	Recommended but not performed, unknown reason	Blank(s)	Blank(s)	Blank(s)	9	Blank(s)	Blank(s)	Blank(s)	Blank(s)	Blank(s)	Blank(s)	Blank(s)	Blank(s)	Blank(s)	Complete dates are available and there are 0 days of survival	Liver	1324	776	784	1328	817	1346	1230	761	0	1986	Blank(s)	Blank(s)	Blank(s)	Dead
80-84 years	Other (American Indian/AK Native, Asian/Pacific Islander)	Male	Positive histology	Unknown	Liver	8170	Blank(s)	Blank(s)	Blank(s)	Blank(s)	Blank(s)	Blank(s)	Recommended but not performed, unknown reason	Blank(s)	Blank(s)	Blank(s)	9	Blank(s)	Blank(s)	Blank(s)	Blank(s)	Blank(s)	Blank(s)	Blank(s)	Blank(s)	Blank(s)	Complete dates are available and there are more than 0 days of survival	State DC not available or state DC available but no COD	1324	776	784	1328	817	1346	1230	761	0	1983	Blank(s)	Blank(s)	Blank(s)	Dead
35-39 years	Other (American Indian/AK Native, Asian/Pacific Islander)	Male	Positive histology	Unknown	Liver	8170	Blank(s)	Blank(s)	Blank(s)	Blank(s)	Blank(s)	Blank(s)	Recommended but not performed, unknown reason	Blank(s)	Blank(s)	Blank(s)	9	Blank(s)	Blank(s)	Blank(s)	Blank(s)	Blank(s)	Blank(s)	Blank(s)	Blank(s)	Blank(s)	Complete dates are available and there are more than 0 days of survival	Liver	1085	781	766	1065	760	1053	988	715	0	1984	Blank(s)	Blank(s)	Blank(s)	Dead
50-54 years	White	Male	Radiography without microscopic confirm	Unknown	Liver	8170	Blank(s)	Blank(s)	Blank(s)	Blank(s)	Blank(s)	Blank(s)	Recommended but not performed, unknown reason	Blank(s)	Blank(s)	Blank(s)	9	Blank(s)	Blank(s)	Blank(s)	Blank(s)	Blank(s)	Blank(s)	Blank(s)	Blank(s)	Blank(s)	Complete dates are available and there are more than 0 days of survival	Liver	1324	776	784	1328	817	1346	1230	761	9	1985	Blank(s)	Blank(s)	Blank(s)	Dead
65-69 years	White	Female	Positive histology	Unknown	Liver	8170	Blank(s)	Blank(s)	Blank(s)	Blank(s)	Blank(s)	Blank(s)	Recommended but not performed, unknown reason	Blank(s)	Blank(s)	Blank(s)	9	Blank(s)	Blank(s)	Blank(s)	Blank(s)	Blank(s)	Blank(s)	Blank(s)	Blank(s)	Blank(s)	Complete dates are available and there are more than 0 days of survival	Liver	1250	851	883	1288	861	1250	1179	819	1	1984	Blank(s)	Blank(s)	Blank(s)	Dead
45-49 years	White	Male	Radiography without microscopic confirm	Unknown	Liver	8170	Blank(s)	Blank(s)	Blank(s)	Blank(s)	Blank(s)	Blank(s)	Recommended but not performed, unknown reason	Blank(s)	Blank(s)	Blank(s)	9	Blank(s)	Blank(s)	Blank(s)	Blank(s)	Blank(s)	Blank(s)	Blank(s)	Blank(s)	Blank(s)	Incomplete dates are available and there cannot be zero days of follow-up	Chronic Liver Disease and Cirrhosis	797	484	467	759	477	760	695	453	0	1983	Blank(s)	Blank(s)	Blank(s)	Dead
70-74 years	White	Male	Positive histology	Well differentiated; Grade I	Liver	8170	Blank(s)	Blank(s)	Blank(s)	Blank(s)	Blank(s)	Blank(s)	Recommended but not performed, unknown reason	Blank(s)	Blank(s)	Blank(s)	9	Blank(s)	Blank(s)	Blank(s)	Blank(s)	Blank(s)	Blank(s)	Blank(s)	Blank(s)	Blank(s)	Complete dates are available and there are more than 0 days of survival	Liver	1250	851	883	1288	861	1250	1179	819	7	1984	Blank(s)	Blank(s)	Blank(s)	Dead
50-54 years	White	Female	Positive histology	Unknown	Liver	8140	Blank(s)	Blank(s)	Blank(s)	Blank(s)	Blank(s)	Blank(s)	Recommended but not performed, unknown reason	Blank(s)	Blank(s)	Blank(s)	9	Blank(s)	Blank(s)	Blank(s)	Blank(s)	Blank(s)	Blank(s)	Blank(s)	Blank(s)	Blank(s)	Complete dates are available and there are more than 0 days of survival	Intrahepatic Bile Duct	1250	851	883	1288	861	1250	1179	819	0	1984	Blank(s)	Blank(s)	Blank(s)	Dead
75-79 years	Other (American Indian/AK Native, Asian/Pacific Islander)	Male	Positive histology	Unknown	Liver	8170	Blank(s)	Blank(s)	Blank(s)	Blank(s)	Blank(s)	Blank(s)	Recommended but not performed, unknown reason	Blank(s)	Blank(s)	Blank(s)	9	Blank(s)	Blank(s)	Blank(s)	Blank(s)	Blank(s)	Blank(s)	Blank(s)	Blank(s)	Blank(s)	Complete dates are available and there are more than 0 days of survival	Liver	1324	776	784	1328	817	1346	1230	761	1	1984	Blank(s)	Blank(s)	Blank(s)	Dead
65-69 years	White	Male	Positive histology	Moderately differentiated; Grade II	Liver	8170	Blank(s)	Blank(s)	Blank(s)	Blank(s)	Blank(s)	Blank(s)	Surgery performed	Blank(s)	Blank(s)	Blank(s)	90	Blank(s)	Blank(s)	Blank(s)	Blank(s)	Blank(s)	Blank(s)	Blank(s)	Blank(s)	Blank(s)	Complete dates are available and there are more than 0 days of survival	Pneumonia and Influenza	1085	781	766	1065	760	1053	988	715	32	1983	Blank(s)	Blank(s)	Blank(s)	Dead
45-49 years	White	Male	Positive histology	Unknown	Liver	8170	Blank(s)	Blank(s)	Blank(s)	Blank(s)	Blank(s)	Blank(s)	Recommended but not performed, unknown reason	Blank(s)	Blank(s)	Blank(s)	9	Blank(s)	Blank(s)	Blank(s)	Blank(s)	Blank(s)	Blank(s)	Blank(s)	Blank(s)	Blank(s)	Complete dates are available and there are more than 0 days of survival	Other Cause of Death	1250	851	883	1288	861	1250	1179	819	0	1980	Blank(s)	Blank(s)	Blank(s)	Dead
65-69 years	Other (American Indian/AK Native, Asian/Pacific Islander)	Male	Positive histology	Well differentiated; Grade I	Liver	8170	Blank(s)	Blank(s)	Blank(s)	Blank(s)	Blank(s)	Blank(s)	Surgery performed	Blank(s)	Blank(s)	Blank(s)	90	Blank(s)	Blank(s)	Blank(s)	Blank(s)	Blank(s)	Blank(s)	Blank(s)	Blank(s)	Blank(s)	Complete dates are available and there are more than 0 days of survival	Miscellaneous Malignant Cancer	1324	776	784	1328	817	1346	1230	761	21	1985	Blank(s)	Blank(s)	Blank(s)	Dead
70-74 years	Black	Male	Positive histology	Unknown	Liver	8170	Blank(s)	Blank(s)	Blank(s)	Blank(s)	Blank(s)	Blank(s)	Recommended but not performed, unknown reason	Blank(s)	Blank(s)	Blank(s)	9	Blank(s)	Blank(s)	Blank(s)	Blank(s)	Blank(s)	Blank(s)	Blank(s)	Blank(s)	Blank(s)	Complete dates are available and there are more than 0 days of survival	Other Cause of Death	1085	781	766	1065	760	1053	988	715	0	1986	Blank(s)	Blank(s)	Blank(s)	Dead
70-74 years	White	Female	Positive exfoliative cytology, no positive histology	Unknown	Liver	8170	Blank(s)	Blank(s)	88	Blank(s)	Blank(s)	Blank(s)	Recommended, unknown if performed	Blank(s)	Blank(s)	Blank(s)	0	Blank(s)	0	Blank(s)	Blank(s)	Blank(s)	Blank(s)	Blank(s)	Blank(s)	Blank(s)	Complete dates are available and there are more than 0 days of survival	Diseases of Heart	797	484	467	759	477	760	695	453	3	1996	Blank(s)	Blank(s)	Blank(s)	Dead
80-84 years	White	Female	Positive histology	Unknown	Liver	8481	Blank(s)	Blank(s)	Blank(s)	Blank(s)	Blank(s)	Blank(s)	Recommended but not performed, unknown reason	Blank(s)	Blank(s)	Blank(s)	9	Blank(s)	Blank(s)	Blank(s)	Blank(s)	Blank(s)	Blank(s)	Blank(s)	Blank(s)	Blank(s)	Complete dates are available and there are more than 0 days of survival	Liver	1085	781	766	1065	760	1053	988	715	0	1985	Blank(s)	Blank(s)	Blank(s)	Dead
70-74 years	White	Male	Positive histology	Unknown	Liver	8170	Blank(s)	Blank(s)	Blank(s)	Blank(s)	Blank(s)	Blank(s)	Not recommended, contraindicated due to other cond; autopsy only (1973-2002)	Blank(s)	Blank(s)	Blank(s)	0	Blank(s)	Blank(s)	Blank(s)	Blank(s)	Blank(s)	Blank(s)	Blank(s)	Blank(s)	Blank(s)	Not calculated because a Death Certificate Only or Autopsy Only case	Chronic Liver Disease and Cirrhosis	1324	776	784	1328	817	1346	1230	761	Unknown	1985	Blank(s)	Blank(s)	Blank(s)	Dead
60-64 years	White	Male	Positive histology	Unknown	Liver	8170	Blank(s)	Blank(s)	Blank(s)	Blank(s)	Blank(s)	Blank(s)	Recommended but not performed, unknown reason	Blank(s)	Blank(s)	Blank(s)	9	Blank(s)	Blank(s)	Blank(s)	Blank(s)	Blank(s)	Blank(s)	Blank(s)	Blank(s)	Blank(s)	Complete dates are available and there are more than 0 days of survival	Miscellaneous Malignant Cancer	1085	781	766	1065	760	1053	988	715	0	1984	Blank(s)	Blank(s)	Blank(s)	Dead
70-74 years	Other (American Indian/AK Native, Asian/Pacific Islander)	Male	Positive histology	Poorly differentiated; Grade III	Liver	8170	Blank(s)	Blank(s)	Blank(s)	Blank(s)	Blank(s)	Blank(s)	Recommended but not performed, unknown reason	Blank(s)	Blank(s)	Blank(s)	9	Blank(s)	Blank(s)	Blank(s)	Blank(s)	Blank(s)	Blank(s)	Blank(s)	Blank(s)	Blank(s)	Complete dates are available and there are more than 0 days of survival	Liver	1324	776	784	1328	817	1346	1230	761	2	1982	Blank(s)	Blank(s)	Blank(s)	Dead
75-79 years	Other (American Indian/AK Native, Asian/Pacific Islander)	Male	Positive histology	Unknown	Liver	8170	Blank(s)	Blank(s)	Blank(s)	Blank(s)	Blank(s)	Blank(s)	Recommended but not performed, unknown reason	Blank(s)	Blank(s)	Blank(s)	9	Blank(s)	Blank(s)	Blank(s)	Blank(s)	Blank(s)	Blank(s)	Blank(s)	Blank(s)	Blank(s)	Complete dates are available and there are more than 0 days of survival	Liver	1324	776	784	1328	817	1346	1230	761	2	1984	Blank(s)	Blank(s)	Blank(s)	Dead
60-64 years	Black	Male	Positive histology	Unknown	Liver	8010	Blank(s)	Blank(s)	Blank(s)	Blank(s)	Blank(s)	Blank(s)	Recommended but not performed, unknown reason	Blank(s)	Blank(s)	Blank(s)	9	Blank(s)	Blank(s)	Blank(s)	Blank(s)	Blank(s)	Blank(s)	Blank(s)	Blank(s)	Blank(s)	Complete dates are available and there are more than 0 days of survival	Liver	1250	851	883	1288	861	1250	1179	819	0	1983	Blank(s)	Blank(s)	Blank(s)	Dead
60-64 years	Other (American Indian/AK Native, Asian/Pacific Islander)	Male	Positive histology	Undifferentiated; anaplastic; Grade IV	Liver	8020	Blank(s)	Blank(s)	Blank(s)	Blank(s)	Blank(s)	Blank(s)	Recommended but not performed, unknown reason	Blank(s)	Blank(s)	Blank(s)	9	Blank(s)	Blank(s)	Blank(s)	Blank(s)	Blank(s)	Blank(s)	Blank(s)	Blank(s)	Blank(s)	Complete dates are available and there are more than 0 days of survival	Liver	833	495	534	878	444	774	723	419	3	1984	Blank(s)	Blank(s)	Blank(s)	Dead
60-64 years	White	Female	Positive histology	Unknown	Liver	8170	Blank(s)	Blank(s)	Blank(s)	Blank(s)	Blank(s)	Blank(s)	Recommended but not performed, unknown reason	Blank(s)	Blank(s)	Blank(s)	9	Blank(s)	Blank(s)	Blank(s)	Blank(s)	Blank(s)	Blank(s)	Blank(s)	Blank(s)	Blank(s)	Complete dates are available and there are more than 0 days of survival	Liver	797	484	467	759	477	760	695	453	1	1984	Blank(s)	Blank(s)	Blank(s)	Dead
70-74 years	White	Female	Positive histology	Unknown	Liver	8170	Blank(s)	Blank(s)	Blank(s)	Blank(s)	Blank(s)	Blank(s)	Recommended but not performed, unknown reason	Blank(s)	Blank(s)	Blank(s)	9	Blank(s)	Blank(s)	Blank(s)	Blank(s)	Blank(s)	Blank(s)	Blank(s)	Blank(s)	Blank(s)	Complete dates are available and there are more than 0 days of survival	Liver	1324	776	784	1328	817	1346	1230	761	11	1986	Blank(s)	Blank(s)	Blank(s)	Dead
70-74 years	Other (American Indian/AK Native, Asian/Pacific Islander)	Female	Positive histology	Unknown	Liver	8170	Blank(s)	Blank(s)	Blank(s)	Blank(s)	Blank(s)	Blank(s)	Recommended but not performed, unknown reason	Blank(s)	Blank(s)	Blank(s)	9	Blank(s)	Blank(s)	Blank(s)	Blank(s)	Blank(s)	Blank(s)	Blank(s)	Blank(s)	Blank(s)	Complete dates are available and there are more than 0 days of survival	Liver	1324	776	784	1328	817	1346	1230	761	1	1986	Blank(s)	Blank(s)	Blank(s)	Dead
70-74 years	Black	Male	Positive histology	Unknown	Liver	8170	Blank(s)	Blank(s)	Blank(s)	Blank(s)	Blank(s)	Blank(s)	Recommended but not performed, unknown reason	Blank(s)	Blank(s)	Blank(s)	9	Blank(s)	Blank(s)	Blank(s)	Blank(s)	Blank(s)	Blank(s)	Blank(s)	Blank(s)	Blank(s)	Complete dates are available and there are more than 0 days of survival	Liver	1324	776	784	1328	817	1346	1230	761	0	1984	Blank(s)	Blank(s)	Blank(s)	Dead
60-64 years	White	Female	Positive exfoliative cytology, no positive histology	Unknown	Liver	8170	Blank(s)	Blank(s)	88	Blank(s)	Blank(s)	Blank(s)	Not recommended	Blank(s)	Blank(s)	Blank(s)	0	Blank(s)	0	Blank(s)	Blank(s)	Blank(s)	Blank(s)	Blank(s)	Blank(s)	Blank(s)	Complete dates are available and there are more than 0 days of survival	Other Infectious and Parasitic Diseases including HIV	1250	851	883	1288	861	1250	1179	819	46	1996	Blank(s)	Blank(s)	Blank(s)	Dead
80-84 years	White	Male	Positive histology	Unknown	Liver	8170	Blank(s)	Blank(s)	Blank(s)	Blank(s)	Blank(s)	Blank(s)	Recommended but not performed, unknown reason	Blank(s)	Blank(s)	Blank(s)	9	Blank(s)	Blank(s)	Blank(s)	Blank(s)	Blank(s)	Blank(s)	Blank(s)	Blank(s)	Blank(s)	Complete dates are available and there are more than 0 days of survival	Liver	833	495	534	878	444	774	723	419	7	1981	Blank(s)	Blank(s)	Blank(s)	Dead
65-69 years	White	Male	Unknown	Unknown	Liver	8170	UNK Stage	UNK Stage	Blank(s)	0	None	None; diagnosed at autopsy	Not recommended	Blank(s)	Blank(s)	Blank(s)	Blank(s)	Blank(s)	0	999	999	0	0	0	999	999	Incomplete dates are available and there cannot be zero days of follow-up	Liver	1324	776	784	1328	817	1346	1230	761	67	2010	TX	N0	M0	Dead
50-54 years	Other (American Indian/AK Native, Asian/Pacific Islander)	Male	Positive histology	Well differentiated; Grade I	Liver	8170	Blank(s)	Blank(s)	Blank(s)	Blank(s)	Blank(s)	Blank(s)	Recommended but not performed, unknown reason	Blank(s)	Blank(s)	Blank(s)	9	Blank(s)	Blank(s)	Blank(s)	Blank(s)	Blank(s)	Blank(s)	Blank(s)	Blank(s)	Blank(s)	Complete dates are available and there are more than 0 days of survival	Liver	797	484	467	759	477	760	695	453	16	1982	Blank(s)	Blank(s)	Blank(s)	Dead
70-74 years	Other (American Indian/AK Native, Asian/Pacific Islander)	Male	Positive histology	Poorly differentiated; Grade III	Liver	8170	Blank(s)	IIIA	Blank(s)	0	None	None; diagnosed at autopsy	Not recommended	Blank(s)	Blank(s)	Blank(s)	Blank(s)	Blank(s)	0	82	390	0	0	0	10	999	Complete dates are available and there are more than 0 days of survival	Liver	1250	851	883	1288	861	1250	1179	819	40	2004	Blank(s)	Blank(s)	Blank(s)	Dead
60-64 years	Black	Male	Positive histology	Unknown	Liver	8170	Blank(s)	Blank(s)	Blank(s)	Blank(s)	Blank(s)	Blank(s)	Recommended but not performed, unknown reason	Blank(s)	Blank(s)	Blank(s)	9	Blank(s)	Blank(s)	Blank(s)	Blank(s)	Blank(s)	Blank(s)	Blank(s)	Blank(s)	Blank(s)	Complete dates are available and there are more than 0 days of survival	Liver	1324	776	784	1328	817	1346	1230	761	5	1984	Blank(s)	Blank(s)	Blank(s)	Dead
75-79 years	White	Female	Positive histology	Well differentiated; Grade I	Liver	8170	Blank(s)	Blank(s)	Blank(s)	Blank(s)	Blank(s)	Blank(s)	Surgery performed	Blank(s)	Blank(s)	Blank(s)	90	Blank(s)	Blank(s)	Blank(s)	Blank(s)	Blank(s)	Blank(s)	Blank(s)	Blank(s)	Blank(s)	Complete dates are available and there are more than 0 days of survival	Liver	1085	781	766	1065	760	1053	988	715	39	1987	Blank(s)	Blank(s)	Blank(s)	Dead
55-59 years	Other (American Indian/AK Native, Asian/Pacific Islander)	Male	Positive histology	Poorly differentiated; Grade III	Liver	8010	Blank(s)	Blank(s)	Blank(s)	Blank(s)	Blank(s)	Blank(s)	Recommended but not performed, unknown reason	Blank(s)	Blank(s)	Blank(s)	9	Blank(s)	Blank(s)	Blank(s)	Blank(s)	Blank(s)	Blank(s)	Blank(s)	Blank(s)	Blank(s)	Complete dates are available and there are more than 0 days of survival	Liver	1250	851	883	1288	861	1250	1179	819	0	1981	Blank(s)	Blank(s)	Blank(s)	Dead
70-74 years	Black	Male	Positive histology	Unknown	Liver	8170	Blank(s)	Blank(s)	Blank(s)	Blank(s)	Blank(s)	Blank(s)	Recommended but not performed, unknown reason	Blank(s)	Blank(s)	Blank(s)	9	Blank(s)	Blank(s)	Blank(s)	Blank(s)	Blank(s)	Blank(s)	Blank(s)	Blank(s)	Blank(s)	Complete dates are available and there are more than 0 days of survival	Liver	797	484	467	759	477	760	695	453	1	1983	Blank(s)	Blank(s)	Blank(s)	Dead
60-64 years	White	Male	Positive laboratory test/marker study	Unknown	Liver	8170	Blank(s)	Blank(s)	88	Blank(s)	Blank(s)	Blank(s)	Not recommended	Blank(s)	Blank(s)	Blank(s)	0	Blank(s)	0	Blank(s)	Blank(s)	Blank(s)	Blank(s)	Blank(s)	Blank(s)	Blank(s)	Complete dates are available and there are more than 0 days of survival	Liver	1324	776	784	1328	817	1346	1230	761	0	1994	Blank(s)	Blank(s)	Blank(s)	Dead
85+ years	White	Female	Positive histology	Unknown	Liver	8170	Blank(s)	Blank(s)	Blank(s)	Blank(s)	Blank(s)	Blank(s)	Recommended but not performed, unknown reason	Blank(s)	Blank(s)	Blank(s)	9	Blank(s)	Blank(s)	Blank(s)	Blank(s)	Blank(s)	Blank(s)	Blank(s)	Blank(s)	Blank(s)	Complete dates are available and there are more than 0 days of survival	Liver	1085	781	766	1065	760	1053	988	715	0	1983	Blank(s)	Blank(s)	Blank(s)	Dead
80-84 years	Other (American Indian/AK Native, Asian/Pacific Islander)	Male	Radiography without microscopic confirm	Unknown	Liver	8170	Blank(s)	Blank(s)	Blank(s)	Blank(s)	Blank(s)	Blank(s)	Recommended but not performed, unknown reason	Blank(s)	Blank(s)	Blank(s)	9	Blank(s)	Blank(s)	Blank(s)	Blank(s)	Blank(s)	Blank(s)	Blank(s)	Blank(s)	Blank(s)	Complete dates are available and there are more than 0 days of survival	Liver	1324	776	784	1328	817	1346	1230	761	0	1983	Blank(s)	Blank(s)	Blank(s)	Dead
55-59 years	Other (American Indian/AK Native, Asian/Pacific Islander)	Male	Positive exfoliative cytology, no positive histology	Unknown	Liver	8170	Blank(s)	Blank(s)	Blank(s)	Blank(s)	Blank(s)	Blank(s)	Recommended but not performed, unknown reason	Blank(s)	Blank(s)	Blank(s)	9	Blank(s)	Blank(s)	Blank(s)	Blank(s)	Blank(s)	Blank(s)	Blank(s)	Blank(s)	Blank(s)	Complete dates are available and there are more than 0 days of survival	Liver	1324	776	784	1328	817	1346	1230	761	1	1983	Blank(s)	Blank(s)	Blank(s)	Dead
35-39 years	Other (American Indian/AK Native, Asian/Pacific Islander)	Male	Positive histology	Unknown	Liver	8170	Blank(s)	Blank(s)	Blank(s)	Blank(s)	Blank(s)	Blank(s)	Recommended but not performed, unknown reason	Blank(s)	Blank(s)	Blank(s)	9	Blank(s)	Blank(s)	Blank(s)	Blank(s)	Blank(s)	Blank(s)	Blank(s)	Blank(s)	Blank(s)	Complete dates are available and there are more than 0 days of survival	Liver	1250	851	883	1288	861	1250	1179	819	0	1985	Blank(s)	Blank(s)	Blank(s)	Dead
85+ years	White	Male	Unknown	Unknown	Liver	8010	Blank(s)	Blank(s)	Blank(s)	Blank(s)	Blank(s)	Blank(s)	Unknown; death certificate; or autopsy only (2003+)	Blank(s)	Blank(s)	Blank(s)	9	Blank(s)	Blank(s)	Blank(s)	Blank(s)	Blank(s)	Blank(s)	Blank(s)	Blank(s)	Blank(s)	Not calculated because a Death Certificate Only or Autopsy Only case	Diseases of Heart	1250	851	883	1288	861	1250	1179	819	Unknown	1983	Blank(s)	Blank(s)	Blank(s)	Dead
55-59 years	White	Male	Radiography without microscopic confirm	Unknown	Liver	8170	Blank(s)	Blank(s)	Blank(s)	Blank(s)	Blank(s)	Blank(s)	Recommended but not performed, unknown reason	Blank(s)	Blank(s)	Blank(s)	9	Blank(s)	Blank(s)	Blank(s)	Blank(s)	Blank(s)	Blank(s)	Blank(s)	Blank(s)	Blank(s)	Complete dates are available and there are more than 0 days of survival	Liver	1324	776	784	1328	817	1346	1230	761	0	1987	Blank(s)	Blank(s)	Blank(s)	Dead
60-64 years	Black	Male	Positive histology	Unknown	Liver	8170	Blank(s)	Blank(s)	Blank(s)	Blank(s)	Blank(s)	Blank(s)	Surgery performed	Blank(s)	Blank(s)	Blank(s)	90	Blank(s)	Blank(s)	Blank(s)	Blank(s)	Blank(s)	Blank(s)	Blank(s)	Blank(s)	Blank(s)	Complete dates are available and there are more than 0 days of survival	Miscellaneous Malignant Cancer	1250	851	883	1288	861	1250	1179	819	20	1985	Blank(s)	Blank(s)	Blank(s)	Dead
70-74 years	Other (American Indian/AK Native, Asian/Pacific Islander)	Male	Positive histology	Unknown	Liver	8170	Blank(s)	Blank(s)	Blank(s)	Blank(s)	Blank(s)	Blank(s)	Recommended but not performed, unknown reason	Blank(s)	Blank(s)	Blank(s)	9	Blank(s)	Blank(s)	Blank(s)	Blank(s)	Blank(s)	Blank(s)	Blank(s)	Blank(s)	Blank(s)	Complete dates are available and there are more than 0 days of survival	Liver	1324	776	784	1328	817	1346	1230	761	5	1982	Blank(s)	Blank(s)	Blank(s)	Dead
55-59 years	Other (American Indian/AK Native, Asian/Pacific Islander)	Female	Positive histology	Well differentiated; Grade I	Liver	8170	Blank(s)	Blank(s)	Blank(s)	Blank(s)	Blank(s)	Blank(s)	Surgery performed	Blank(s)	Blank(s)	Blank(s)	90	Blank(s)	Blank(s)	Blank(s)	Blank(s)	Blank(s)	Blank(s)	Blank(s)	Blank(s)	Blank(s)	Incomplete dates are available and there cannot be zero days of follow-up	Liver	1250	851	883	1288	861	1250	1179	819	26	1985	Blank(s)	Blank(s)	Blank(s)	Dead
55-59 years	Other (American Indian/AK Native, Asian/Pacific Islander)	Male	Unknown	Unknown	Liver	8170	Blank(s)	Blank(s)	Blank(s)	Blank(s)	Blank(s)	Blank(s)	Unknown; death certificate; or autopsy only (2003+)	Blank(s)	Blank(s)	Blank(s)	9	Blank(s)	Blank(s)	Blank(s)	Blank(s)	Blank(s)	Blank(s)	Blank(s)	Blank(s)	Blank(s)	Not calculated because a Death Certificate Only or Autopsy Only case	Liver	1324	776	784	1328	817	1346	1230	761	Unknown	1983	Blank(s)	Blank(s)	Blank(s)	Dead
30-34 years	White	Female	Positive histology	Unknown	Liver	8170	Blank(s)	Blank(s)	Blank(s)	Blank(s)	Blank(s)	Blank(s)	Surgery performed	Blank(s)	Blank(s)	Blank(s)	90	Blank(s)	Blank(s)	Blank(s)	Blank(s)	Blank(s)	Blank(s)	Blank(s)	Blank(s)	Blank(s)	Complete dates are available and there are more than 0 days of survival	Alive	1250	851	883	1288	861	1250	1179	819	416	1982	Blank(s)	Blank(s)	Blank(s)	Alive
75-79 years	Other (American Indian/AK Native, Asian/Pacific Islander)	Female	Positive histology	Unknown	Liver	8170	Blank(s)	Blank(s)	Blank(s)	Blank(s)	Blank(s)	Blank(s)	Recommended but not performed, unknown reason	Blank(s)	Blank(s)	Blank(s)	9	Blank(s)	Blank(s)	Blank(s)	Blank(s)	Blank(s)	Blank(s)	Blank(s)	Blank(s)	Blank(s)	Complete dates are available and there are more than 0 days of survival	Liver	1250	851	883	1288	861	1250	1179	819	8	1983	Blank(s)	Blank(s)	Blank(s)	Dead
75-79 years	Other (American Indian/AK Native, Asian/Pacific Islander)	Female	Radiography without microscopic confirm	Unknown	Liver	8170	I	I	Blank(s)	16	None	None; diagnosed at autopsy	Surgery performed	Blank(s)	Blank(s)	Blank(s)	Blank(s)	Blank(s)	0	34	100	0	0	0	998	1	Complete dates are available and there are more than 0 days of survival	Liver	797	484	467	759	477	760	695	453	37	2012	T1	N0	M0	Dead
65-69 years	White	Male	Positive exfoliative cytology, no positive histology	Unknown	Liver	8170	Blank(s)	Blank(s)	88	Blank(s)	Blank(s)	Blank(s)	Not recommended	Blank(s)	Blank(s)	Blank(s)	0	Blank(s)	0	Blank(s)	Blank(s)	Blank(s)	Blank(s)	Blank(s)	Blank(s)	Blank(s)	Complete dates are available and there are more than 0 days of survival	Liver	797	484	467	759	477	760	695	453	17	1995	Blank(s)	Blank(s)	Blank(s)	Dead
85+ years	White	Male	Positive histology	Unknown	Liver	8170	Blank(s)	Blank(s)	Blank(s)	Blank(s)	Blank(s)	Blank(s)	Surgery performed	Blank(s)	Blank(s)	Blank(s)	90	Blank(s)	Blank(s)	Blank(s)	Blank(s)	Blank(s)	Blank(s)	Blank(s)	Blank(s)	Blank(s)	Complete dates are available and there are more than 0 days of survival	Liver	797	484	467	759	477	760	695	453	28	1981	Blank(s)	Blank(s)	Blank(s)	Dead
85+ years	White	Female	Positive histology	Unknown	Liver	8170	Blank(s)	Blank(s)	Blank(s)	Blank(s)	Blank(s)	Blank(s)	Recommended but not performed, unknown reason	Blank(s)	Blank(s)	Blank(s)	9	Blank(s)	Blank(s)	Blank(s)	Blank(s)	Blank(s)	Blank(s)	Blank(s)	Blank(s)	Blank(s)	Complete dates are available and there are more than 0 days of survival	Liver	1324	776	784	1328	817	1346	1230	761	6	1983	Blank(s)	Blank(s)	Blank(s)	Dead
65-69 years	White	Male	Positive histology	Well differentiated; Grade I	Liver	8170	Blank(s)	Blank(s)	Blank(s)	Blank(s)	Blank(s)	Blank(s)	Recommended but not performed, unknown reason	Blank(s)	Blank(s)	Blank(s)	9	Blank(s)	Blank(s)	Blank(s)	Blank(s)	Blank(s)	Blank(s)	Blank(s)	Blank(s)	Blank(s)	Complete dates are available and there are more than 0 days of survival	Liver	1085	781	766	1065	760	1053	988	715	3	1981	Blank(s)	Blank(s)	Blank(s)	Dead
80-84 years	White	Male	Positive histology	Unknown	Liver	8012	Blank(s)	Blank(s)	Blank(s)	Blank(s)	Blank(s)	Blank(s)	Recommended but not performed, unknown reason	Blank(s)	Blank(s)	Blank(s)	9	Blank(s)	Blank(s)	Blank(s)	Blank(s)	Blank(s)	Blank(s)	Blank(s)	Blank(s)	Blank(s)	Complete dates are available and there are more than 0 days of survival	Liver	1324	776	784	1328	817	1346	1230	761	1	1980	Blank(s)	Blank(s)	Blank(s)	Dead
65-69 years	White	Male	Positive histology	Unknown	Liver	8170	Blank(s)	Blank(s)	Blank(s)	Blank(s)	Blank(s)	Blank(s)	Not recommended, contraindicated due to other cond; autopsy only (1973-2002)	Blank(s)	Blank(s)	Blank(s)	0	Blank(s)	Blank(s)	Blank(s)	Blank(s)	Blank(s)	Blank(s)	Blank(s)	Blank(s)	Blank(s)	Not calculated because a Death Certificate Only or Autopsy Only case	Chronic Liver Disease and Cirrhosis	797	484	467	759	477	760	695	453	Unknown	1983	Blank(s)	Blank(s)	Blank(s)	Dead
60-64 years	White	Male	Positive histology	Unknown	Liver	8170	Blank(s)	Blank(s)	Blank(s)	Blank(s)	Blank(s)	Blank(s)	Surgery performed	Blank(s)	Blank(s)	Blank(s)	90	Blank(s)	Blank(s)	Blank(s)	Blank(s)	Blank(s)	Blank(s)	Blank(s)	Blank(s)	Blank(s)	Complete dates are available and there are more than 0 days of survival	Diseases of Heart	1250	851	883	1288	861	1250	1179	819	75	1984	Blank(s)	Blank(s)	Blank(s)	Dead
50-54 years	Other (American Indian/AK Native, Asian/Pacific Islander)	Male	Radiography without microscopic confirm	Unknown	Liver	8170	Blank(s)	Blank(s)	Blank(s)	Blank(s)	Blank(s)	Blank(s)	Recommended but not performed, unknown reason	Blank(s)	Blank(s)	Blank(s)	9	Blank(s)	Blank(s)	Blank(s)	Blank(s)	Blank(s)	Blank(s)	Blank(s)	Blank(s)	Blank(s)	Complete dates are available and there are more than 0 days of survival	Hypertension without Heart Disease	1324	776	784	1328	817	1346	1230	761	1	1980	Blank(s)	Blank(s)	Blank(s)	Dead
75-79 years	Other (American Indian/AK Native, Asian/Pacific Islander)	Male	Positive exfoliative cytology, no positive histology	Unknown	Liver	8310	Blank(s)	Blank(s)	88	Blank(s)	Blank(s)	Blank(s)	Not recommended	Blank(s)	Blank(s)	Blank(s)	0	Blank(s)	0	Blank(s)	Blank(s)	Blank(s)	Blank(s)	Blank(s)	Blank(s)	Blank(s)	Complete dates are available and there are more than 0 days of survival	Liver	1324	776	784	1328	817	1346	1230	761	16	1996	Blank(s)	Blank(s)	Blank(s)	Dead
65-69 years	Other (American Indian/AK Native, Asian/Pacific Islander)	Female	Positive histology	Unknown	Liver	8170	Blank(s)	Blank(s)	Blank(s)	Blank(s)	Blank(s)	Blank(s)	Recommended but not performed, unknown reason	Blank(s)	Blank(s)	Blank(s)	9	Blank(s)	Blank(s)	Blank(s)	Blank(s)	Blank(s)	Blank(s)	Blank(s)	Blank(s)	Blank(s)	Complete dates are available and there are more than 0 days of survival	Liver	1250	851	883	1288	861	1250	1179	819	0	1980	Blank(s)	Blank(s)	Blank(s)	Dead
75-79 years	White	Male	Positive histology	Unknown	Liver	8170	Blank(s)	Blank(s)	Blank(s)	Blank(s)	Blank(s)	Blank(s)	Recommended but not performed, unknown reason	Blank(s)	Blank(s)	Blank(s)	9	Blank(s)	Blank(s)	Blank(s)	Blank(s)	Blank(s)	Blank(s)	Blank(s)	Blank(s)	Blank(s)	Complete dates are available and there are more than 0 days of survival	Liver	797	484	467	759	477	760	695	453	0	1987	Blank(s)	Blank(s)	Blank(s)	Dead
70-74 years	Other (American Indian/AK Native, Asian/Pacific Islander)	Female	Positive histology	Unknown	Liver	8170	Blank(s)	Blank(s)	Blank(s)	Blank(s)	Blank(s)	Blank(s)	Recommended but not performed, unknown reason	Blank(s)	Blank(s)	Blank(s)	9	Blank(s)	Blank(s)	Blank(s)	Blank(s)	Blank(s)	Blank(s)	Blank(s)	Blank(s)	Blank(s)	Complete dates are available and there are more than 0 days of survival	Liver	1250	851	883	1288	861	1250	1179	819	1	1982	Blank(s)	Blank(s)	Blank(s)	Dead
75-79 years	Other (American Indian/AK Native, Asian/Pacific Islander)	Male	Positive histology	Unknown	Liver	8170	Blank(s)	Blank(s)	Blank(s)	Blank(s)	Blank(s)	Blank(s)	Recommended but not performed, unknown reason	Blank(s)	Blank(s)	Blank(s)	9	Blank(s)	Blank(s)	Blank(s)	Blank(s)	Blank(s)	Blank(s)	Blank(s)	Blank(s)	Blank(s)	Complete dates are available and there are more than 0 days of survival	Liver	1250	851	883	1288	861	1250	1179	819	27	1981	Blank(s)	Blank(s)	Blank(s)	Dead
70-74 years	White	Female	Positive histology	Unknown	Liver	8170	Blank(s)	Blank(s)	Blank(s)	Blank(s)	Blank(s)	Blank(s)	Recommended but not performed, unknown reason	Blank(s)	Blank(s)	Blank(s)	9	Blank(s)	Blank(s)	Blank(s)	Blank(s)	Blank(s)	Blank(s)	Blank(s)	Blank(s)	Blank(s)	Complete dates are available and there are more than 0 days of survival	Liver	1250	851	883	1288	861	1250	1179	819	1	1982	Blank(s)	Blank(s)	Blank(s)	Dead
80-84 years	White	Male	Radiography without microscopic confirm	Unknown	Liver	8010	Blank(s)	Blank(s)	Blank(s)	Blank(s)	Blank(s)	Blank(s)	Recommended but not performed, unknown reason	Blank(s)	Blank(s)	Blank(s)	9	Blank(s)	Blank(s)	Blank(s)	Blank(s)	Blank(s)	Blank(s)	Blank(s)	Blank(s)	Blank(s)	Complete dates are available and there are more than 0 days of survival	Diseases of Heart	1324	776	784	1328	817	1346	1230	761	0	1981	Blank(s)	Blank(s)	Blank(s)	Dead
65-69 years	White	Male	Positive exfoliative cytology, no positive histology	Unknown	Liver	8170	Blank(s)	Blank(s)	Blank(s)	Blank(s)	Blank(s)	Blank(s)	Recommended but not performed, unknown reason	Blank(s)	Blank(s)	Blank(s)	9	Blank(s)	Blank(s)	Blank(s)	Blank(s)	Blank(s)	Blank(s)	Blank(s)	Blank(s)	Blank(s)	Complete dates are available and there are more than 0 days of survival	Chronic Liver Disease and Cirrhosis	797	484	467	759	477	760	695	453	5	1987	Blank(s)	Blank(s)	Blank(s)	Dead
70-74 years	White	Female	Positive histology	Unknown	Liver	8170	Blank(s)	Blank(s)	Blank(s)	Blank(s)	Blank(s)	Blank(s)	Recommended but not performed, unknown reason	Blank(s)	Blank(s)	Blank(s)	9	Blank(s)	Blank(s)	Blank(s)	Blank(s)	Blank(s)	Blank(s)	Blank(s)	Blank(s)	Blank(s)	Complete dates are available and there are more than 0 days of survival	Liver	1085	781	766	1065	760	1053	988	715	3	1984	Blank(s)	Blank(s)	Blank(s)	Dead
60-64 years	Other (American Indian/AK Native, Asian/Pacific Islander)	Female	Clinical diagnosis only	Unknown	Liver	8010	Blank(s)	Blank(s)	Blank(s)	Blank(s)	Blank(s)	Blank(s)	Recommended but not performed, unknown reason	Blank(s)	Blank(s)	Blank(s)	9	Blank(s)	Blank(s)	Blank(s)	Blank(s)	Blank(s)	Blank(s)	Blank(s)	Blank(s)	Blank(s)	Complete dates are available and there are more than 0 days of survival	Liver	1324	776	784	1328	817	1346	1230	761	12	1981	Blank(s)	Blank(s)	Blank(s)	Dead
55-59 years	White	Male	Positive histology	Unknown	Liver	8170	Blank(s)	Blank(s)	Blank(s)	Blank(s)	Blank(s)	Blank(s)	Recommended but not performed, unknown reason	Blank(s)	Blank(s)	Blank(s)	9	Blank(s)	Blank(s)	Blank(s)	Blank(s)	Blank(s)	Blank(s)	Blank(s)	Blank(s)	Blank(s)	Complete dates are available and there are more than 0 days of survival	Liver	1324	776	784	1328	817	1346	1230	761	0	1982	Blank(s)	Blank(s)	Blank(s)	Dead
80-84 years	White	Male	Positive histology	Unknown	BileDuctsIntraHepat	8180	Blank(s)	Blank(s)	Blank(s)	Blank(s)	Blank(s)	Blank(s)	Not recommended, contraindicated due to other cond; autopsy only (1973-2002)	Blank(s)	Blank(s)	Blank(s)	0	Blank(s)	Blank(s)	Blank(s)	Blank(s)	Blank(s)	Blank(s)	Blank(s)	Blank(s)	Blank(s)	Not calculated because a Death Certificate Only or Autopsy Only case	Miscellaneous Malignant Cancer	1324	776	784	1328	817	1346	1230	761	Unknown	1983	Blank(s)	Blank(s)	Blank(s)	Dead
70-74 years	White	Female	Positive histology	Well differentiated; Grade I	Liver	8170	Blank(s)	Blank(s)	Blank(s)	Blank(s)	Blank(s)	Blank(s)	Recommended but not performed, unknown reason	Blank(s)	Blank(s)	Blank(s)	9	Blank(s)	Blank(s)	Blank(s)	Blank(s)	Blank(s)	Blank(s)	Blank(s)	Blank(s)	Blank(s)	Complete dates are available and there are more than 0 days of survival	Liver	1324	776	784	1328	817	1346	1230	761	6	1982	Blank(s)	Blank(s)	Blank(s)	Dead
45-49 years	Other (American Indian/AK Native, Asian/Pacific Islander)	Male	Positive histology	Unknown	Liver	8170	Blank(s)	Blank(s)	Blank(s)	Blank(s)	Blank(s)	Blank(s)	Recommended but not performed, unknown reason	Blank(s)	Blank(s)	Blank(s)	9	Blank(s)	Blank(s)	Blank(s)	Blank(s)	Blank(s)	Blank(s)	Blank(s)	Blank(s)	Blank(s)	Complete dates are available and there are more than 0 days of survival	Liver	1324	776	784	1328	817	1346	1230	761	4	1984	Blank(s)	Blank(s)	Blank(s)	Dead
65-69 years	Black	Female	Clinical diagnosis only	Unknown	Liver	8170	Blank(s)	Blank(s)	Blank(s)	Blank(s)	Blank(s)	Blank(s)	Recommended but not performed, unknown reason	Blank(s)	Blank(s)	Blank(s)	9	Blank(s)	Blank(s)	Blank(s)	Blank(s)	Blank(s)	Blank(s)	Blank(s)	Blank(s)	Blank(s)	Complete dates are available and there are 0 days of survival	Liver	797	484	467	759	477	760	695	453	0	1985	Blank(s)	Blank(s)	Blank(s)	Dead
60-64 years	White	Male	Positive histology	Unknown	Liver	8170	Blank(s)	Blank(s)	Blank(s)	Blank(s)	Blank(s)	Blank(s)	Recommended but not performed, unknown reason	Blank(s)	Blank(s)	Blank(s)	9	Blank(s)	Blank(s)	Blank(s)	Blank(s)	Blank(s)	Blank(s)	Blank(s)	Blank(s)	Blank(s)	Complete dates are available and there are more than 0 days of survival	Liver	1324	776	784	1328	817	1346	1230	761	3	1981	Blank(s)	Blank(s)	Blank(s)	Dead
60-64 years	Other (American Indian/AK Native, Asian/Pacific Islander)	Male	Positive histology	Unknown	Liver	8170	Blank(s)	Blank(s)	Blank(s)	Blank(s)	Blank(s)	Blank(s)	Recommended but not performed, unknown reason	Blank(s)	Blank(s)	Blank(s)	9	Blank(s)	Blank(s)	Blank(s)	Blank(s)	Blank(s)	Blank(s)	Blank(s)	Blank(s)	Blank(s)	Complete dates are available and there are more than 0 days of survival	Pneumonia and Influenza	1324	776	784	1328	817	1346	1230	761	5	1984	Blank(s)	Blank(s)	Blank(s)	Dead
65-69 years	Other (American Indian/AK Native, Asian/Pacific Islander)	Male	Positive histology	Unknown	Liver	8170	Blank(s)	Blank(s)	Blank(s)	Blank(s)	Blank(s)	Blank(s)	Recommended but not performed, unknown reason	Blank(s)	Blank(s)	Blank(s)	9	Blank(s)	Blank(s)	Blank(s)	Blank(s)	Blank(s)	Blank(s)	Blank(s)	Blank(s)	Blank(s)	Complete dates are available and there are more than 0 days of survival	Liver	1324	776	784	1328	817	1346	1230	761	2	1981	Blank(s)	Blank(s)	Blank(s)	Dead
65-69 years	White	Male	Positive exfoliative cytology, no positive histology	Unknown	Liver	8170	Blank(s)	Blank(s)	88	0	Blank(s)	Blank(s)	Not recommended	0	0	0	Blank(s)	Blank(s)	0	Blank(s)	Blank(s)	Blank(s)	Blank(s)	Blank(s)	Blank(s)	Blank(s)	Complete dates are available and there are more than 0 days of survival	Liver	1324	776	784	1328	817	1346	1230	761	15	1998	Blank(s)	Blank(s)	Blank(s)	Dead
75-79 years	White	Male	Unknown	Unknown	Liver	8170	Blank(s)	Blank(s)	Blank(s)	Blank(s)	Blank(s)	Blank(s)	Unknown; death certificate; or autopsy only (2003+)	Blank(s)	Blank(s)	Blank(s)	9	Blank(s)	Blank(s)	Blank(s)	Blank(s)	Blank(s)	Blank(s)	Blank(s)	Blank(s)	Blank(s)	Not calculated because a Death Certificate Only or Autopsy Only case	Liver	1085	781	766	1065	760	1053	988	715	Unknown	1985	Blank(s)	Blank(s)	Blank(s)	Dead
80-84 years	White	Male	Radiography without microscopic confirm	Unknown	Liver	8170	Blank(s)	Blank(s)	88	Blank(s)	Blank(s)	Blank(s)	Not recommended	Blank(s)	Blank(s)	Blank(s)	0	Blank(s)	0	Blank(s)	Blank(s)	Blank(s)	Blank(s)	Blank(s)	Blank(s)	Blank(s)	Complete dates are available and there are more than 0 days of survival	Liver	1250	851	883	1288	861	1250	1179	819	0	1991	Blank(s)	Blank(s)	Blank(s)	Dead
55-59 years	Other (American Indian/AK Native, Asian/Pacific Islander)	Male	Radiography without microscopic confirm	Unknown	Liver	8170	Blank(s)	Blank(s)	Blank(s)	Blank(s)	Blank(s)	Blank(s)	Recommended but not performed, unknown reason	Blank(s)	Blank(s)	Blank(s)	9	Blank(s)	Blank(s)	Blank(s)	Blank(s)	Blank(s)	Blank(s)	Blank(s)	Blank(s)	Blank(s)	Complete dates are available and there are more than 0 days of survival	Liver	1324	776	784	1328	817	1346	1230	761	1	1985	Blank(s)	Blank(s)	Blank(s)	Dead
30-34 years	Other (American Indian/AK Native, Asian/Pacific Islander)	Male	Positive exfoliative cytology, no positive histology	Unknown	Liver	8170	Blank(s)	Blank(s)	Blank(s)	Blank(s)	Blank(s)	Blank(s)	Recommended but not performed, unknown reason	Blank(s)	Blank(s)	Blank(s)	9	Blank(s)	Blank(s)	Blank(s)	Blank(s)	Blank(s)	Blank(s)	Blank(s)	Blank(s)	Blank(s)	Complete dates are available and there are more than 0 days of survival	Liver	1324	776	784	1328	817	1346	1230	761	4	1987	Blank(s)	Blank(s)	Blank(s)	Dead
70-74 years	White	Female	Unknown	Unknown	Liver	8010	Blank(s)	Blank(s)	Blank(s)	Blank(s)	Blank(s)	Blank(s)	Recommended but not performed, unknown reason	Blank(s)	Blank(s)	Blank(s)	9	Blank(s)	Blank(s)	Blank(s)	Blank(s)	Blank(s)	Blank(s)	Blank(s)	Blank(s)	Blank(s)	Complete dates are available and there are more than 0 days of survival	Liver	1085	781	766	1065	760	1053	988	715	2	1984	Blank(s)	Blank(s)	Blank(s)	Dead
70-74 years	White	Female	Unknown	Unknown	Liver	8010	Blank(s)	Blank(s)	Blank(s)	Blank(s)	Blank(s)	Blank(s)	Unknown; death certificate; or autopsy only (2003+)	Blank(s)	Blank(s)	Blank(s)	9	Blank(s)	Blank(s)	Blank(s)	Blank(s)	Blank(s)	Blank(s)	Blank(s)	Blank(s)	Blank(s)	Not calculated because a Death Certificate Only or Autopsy Only case	Liver	833	495	534	878	444	774	723	419	Unknown	1985	Blank(s)	Blank(s)	Blank(s)	Dead
70-74 years	White	Male	Positive histology	Unknown	Liver	8170	Blank(s)	Blank(s)	Blank(s)	Blank(s)	Blank(s)	Blank(s)	Recommended but not performed, unknown reason	Blank(s)	Blank(s)	Blank(s)	9	Blank(s)	Blank(s)	Blank(s)	Blank(s)	Blank(s)	Blank(s)	Blank(s)	Blank(s)	Blank(s)	Complete dates are available and there are more than 0 days of survival	Liver	797	484	467	759	477	760	695	453	2	1986	Blank(s)	Blank(s)	Blank(s)	Dead
70-74 years	White	Female	Positive histology	Unknown	Liver	8170	Blank(s)	Blank(s)	Blank(s)	Blank(s)	Blank(s)	Blank(s)	Recommended but not performed, unknown reason	Blank(s)	Blank(s)	Blank(s)	9	Blank(s)	Blank(s)	Blank(s)	Blank(s)	Blank(s)	Blank(s)	Blank(s)	Blank(s)	Blank(s)	Complete dates are available and there are more than 0 days of survival	Liver	1324	776	784	1328	817	1346	1230	761	4	1981	Blank(s)	Blank(s)	Blank(s)	Dead
60-64 years	Other (American Indian/AK Native, Asian/Pacific Islander)	Male	Positive histology	Unknown	Liver	8170	Blank(s)	Blank(s)	Blank(s)	Blank(s)	Blank(s)	Blank(s)	Recommended but not performed, unknown reason	Blank(s)	Blank(s)	Blank(s)	9	Blank(s)	Blank(s)	Blank(s)	Blank(s)	Blank(s)	Blank(s)	Blank(s)	Blank(s)	Blank(s)	Complete dates are available and there are more than 0 days of survival	Diseases of Heart	1324	776	784	1328	817	1346	1230	761	5	1982	Blank(s)	Blank(s)	Blank(s)	Dead
60-64 years	White	Male	Positive histology	Unknown	Liver	8170	Blank(s)	Blank(s)	Blank(s)	Blank(s)	Blank(s)	Blank(s)	Not recommended, contraindicated due to other cond; autopsy only (1973-2002)	Blank(s)	Blank(s)	Blank(s)	0	Blank(s)	Blank(s)	Blank(s)	Blank(s)	Blank(s)	Blank(s)	Blank(s)	Blank(s)	Blank(s)	Not calculated because a Death Certificate Only or Autopsy Only case	Other Cause of Death	1324	776	784	1328	817	1346	1230	761	Unknown	1982	Blank(s)	Blank(s)	Blank(s)	Dead
65-69 years	White	Male	Positive histology	Undifferentiated; anaplastic; Grade IV	Liver	8012	Blank(s)	Blank(s)	Blank(s)	Blank(s)	Blank(s)	Blank(s)	Recommended but not performed, unknown reason	Blank(s)	Blank(s)	Blank(s)	9	Blank(s)	Blank(s)	Blank(s)	Blank(s)	Blank(s)	Blank(s)	Blank(s)	Blank(s)	Blank(s)	Complete dates are available and there are more than 0 days of survival	Liver	1250	851	883	1288	861	1250	1179	819	0	1987	Blank(s)	Blank(s)	Blank(s)	Dead
65-69 years	Black	Male	Direct visualization without microscopic confirmation	Unknown	Liver	8170	Blank(s)	Blank(s)	Blank(s)	Blank(s)	Blank(s)	Blank(s)	Recommended but not performed, unknown reason	Blank(s)	Blank(s)	Blank(s)	9	Blank(s)	Blank(s)	Blank(s)	Blank(s)	Blank(s)	Blank(s)	Blank(s)	Blank(s)	Blank(s)	Complete dates are available and there are more than 0 days of survival	Liver	1250	851	883	1288	861	1250	1179	819	0	1985	Blank(s)	Blank(s)	Blank(s)	Dead
65-69 years	White	Male	Positive histology	Unknown	Liver	8170	Blank(s)	Blank(s)	Blank(s)	Blank(s)	Blank(s)	Blank(s)	Recommended but not performed, unknown reason	Blank(s)	Blank(s)	Blank(s)	9	Blank(s)	Blank(s)	Blank(s)	Blank(s)	Blank(s)	Blank(s)	Blank(s)	Blank(s)	Blank(s)	Complete dates are available and there are more than 0 days of survival	Liver	1324	776	784	1328	817	1346	1230	761	2	1983	Blank(s)	Blank(s)	Blank(s)	Dead
40-44 years	Other (American Indian/AK Native, Asian/Pacific Islander)	Male	Positive histology	Unknown	Liver	8170	Blank(s)	Blank(s)	Blank(s)	Blank(s)	Blank(s)	Blank(s)	Recommended but not performed, unknown reason	Blank(s)	Blank(s)	Blank(s)	9	Blank(s)	Blank(s)	Blank(s)	Blank(s)	Blank(s)	Blank(s)	Blank(s)	Blank(s)	Blank(s)	Complete dates are available and there are more than 0 days of survival	Liver	1324	776	784	1328	817	1346	1230	761	1	1986	Blank(s)	Blank(s)	Blank(s)	Dead
60-64 years	White	Male	Positive histology	Unknown	Liver	8170	Blank(s)	Blank(s)	88	0	Blank(s)	Blank(s)	Not recommended	0	0	0	Blank(s)	Blank(s)	0	Blank(s)	Blank(s)	Blank(s)	Blank(s)	Blank(s)	Blank(s)	Blank(s)	Complete dates are available and there are more than 0 days of survival	Liver	1250	851	883	1288	861	1250	1179	819	4	1999	Blank(s)	Blank(s)	Blank(s)	Dead
45-49 years	Other (American Indian/AK Native, Asian/Pacific Islander)	Female	Positive exfoliative cytology, no positive histology	Unknown	Liver	8170	Blank(s)	Blank(s)	Blank(s)	Blank(s)	Blank(s)	Blank(s)	Recommended but not performed, unknown reason	Blank(s)	Blank(s)	Blank(s)	9	Blank(s)	Blank(s)	Blank(s)	Blank(s)	Blank(s)	Blank(s)	Blank(s)	Blank(s)	Blank(s)	Complete dates are available and there are more than 0 days of survival	Liver	1324	776	784	1328	817	1346	1230	761	1	1986	Blank(s)	Blank(s)	Blank(s)	Dead
30-34 years	Other (American Indian/AK Native, Asian/Pacific Islander)	Female	Positive histology	Unknown	Liver	8170	Blank(s)	Blank(s)	Blank(s)	Blank(s)	Blank(s)	Blank(s)	Recommended but not performed, unknown reason	Blank(s)	Blank(s)	Blank(s)	9	Blank(s)	Blank(s)	Blank(s)	Blank(s)	Blank(s)	Blank(s)	Blank(s)	Blank(s)	Blank(s)	Complete dates are available and there are more than 0 days of survival	Alive	1324	776	784	1328	817	1346	1230	761	350	1986	Blank(s)	Blank(s)	Blank(s)	Alive
75-79 years	Black	Male	Positive histology	Unknown	Liver	8170	Blank(s)	Blank(s)	Blank(s)	Blank(s)	Blank(s)	Blank(s)	Not recommended, contraindicated due to other cond; autopsy only (1973-2002)	Blank(s)	Blank(s)	Blank(s)	0	Blank(s)	Blank(s)	Blank(s)	Blank(s)	Blank(s)	Blank(s)	Blank(s)	Blank(s)	Blank(s)	Not calculated because a Death Certificate Only or Autopsy Only case	Other Cause of Death	1250	851	883	1288	861	1250	1179	819	Unknown	1985	Blank(s)	Blank(s)	Blank(s)	Dead
75-79 years	White	Female	Positive histology	Unknown	BileDuctsIntraHepat	8160	NA	I	Blank(s)	16	None	None; diagnosed at autopsy	Surgery performed	Blank(s)	Blank(s)	Blank(s)	Blank(s)	Blank(s)	0	20	100	0	0	0	10	999	Complete dates are available and there are more than 0 days of survival	Alive	1324	776	784	1328	817	1346	1230	761	15	2015	NA	NA	NA	Alive
65-69 years	White	Male	Positive exfoliative cytology, no positive histology	Unknown	Liver	8170	Blank(s)	Blank(s)	Blank(s)	Blank(s)	Blank(s)	Blank(s)	Recommended but not performed, unknown reason	Blank(s)	Blank(s)	Blank(s)	9	Blank(s)	Blank(s)	Blank(s)	Blank(s)	Blank(s)	Blank(s)	Blank(s)	Blank(s)	Blank(s)	Complete dates are available and there are more than 0 days of survival	Liver	1324	776	784	1328	817	1346	1230	761	3	1985	Blank(s)	Blank(s)	Blank(s)	Dead
60-64 years	Other (American Indian/AK Native, Asian/Pacific Islander)	Male	Positive histology	Moderately differentiated; Grade II	Liver	8170	Blank(s)	Blank(s)	Blank(s)	Blank(s)	Blank(s)	Blank(s)	Surgery performed	Blank(s)	Blank(s)	Blank(s)	90	Blank(s)	Blank(s)	Blank(s)	Blank(s)	Blank(s)	Blank(s)	Blank(s)	Blank(s)	Blank(s)	Complete dates are available and there are more than 0 days of survival	Liver	1324	776	784	1328	817	1346	1230	761	39	1986	Blank(s)	Blank(s)	Blank(s)	Dead
40-44 years	Other (American Indian/AK Native, Asian/Pacific Islander)	Male	Positive histology	Unknown	Liver	8170	Blank(s)	Blank(s)	Blank(s)	Blank(s)	Blank(s)	Blank(s)	Recommended but not performed, unknown reason	Blank(s)	Blank(s)	Blank(s)	9	Blank(s)	Blank(s)	Blank(s)	Blank(s)	Blank(s)	Blank(s)	Blank(s)	Blank(s)	Blank(s)	Complete dates are available and there are more than 0 days of survival	Liver	1250	851	883	1288	861	1250	1179	819	2	1987	Blank(s)	Blank(s)	Blank(s)	Dead
80-84 years	Other (American Indian/AK Native, Asian/Pacific Islander)	Male	Positive histology	Poorly differentiated; Grade III	Liver	8170	IVB	IV	Blank(s)	0	None	None; diagnosed at autopsy	Not recommended	Blank(s)	Blank(s)	Blank(s)	Blank(s)	Blank(s)	0	130	645	0	40	0	20	999	Complete dates are available and there are more than 0 days of survival	Liver	1324	776	784	1328	817	1346	1230	761	0	2014	T4	N0	M1	Dead
70-74 years	White	Male	Positive histology	Poorly differentiated; Grade III	Liver	8010	Blank(s)	Blank(s)	88	Blank(s)	Blank(s)	Blank(s)	Not recommended	Blank(s)	Blank(s)	Blank(s)	2	Blank(s)	0	Blank(s)	Blank(s)	Blank(s)	Blank(s)	Blank(s)	Blank(s)	Blank(s)	Complete dates are available and there are more than 0 days of survival	Liver	1250	851	883	1288	861	1250	1179	819	0	1991	Blank(s)	Blank(s)	Blank(s)	Dead
50-54 years	Black	Male	Positive histology	Unknown	Liver	8170	Blank(s)	Blank(s)	Blank(s)	Blank(s)	Blank(s)	Blank(s)	Recommended but not performed, unknown reason	Blank(s)	Blank(s)	Blank(s)	9	Blank(s)	Blank(s)	Blank(s)	Blank(s)	Blank(s)	Blank(s)	Blank(s)	Blank(s)	Blank(s)	Complete dates are available and there are more than 0 days of survival	Liver	1324	776	784	1328	817	1346	1230	761	0	1982	Blank(s)	Blank(s)	Blank(s)	Dead
40-44 years	Other (American Indian/AK Native, Asian/Pacific Islander)	Male	Positive histology	Poorly differentiated; Grade III	Liver	8170	Blank(s)	Blank(s)	Blank(s)	Blank(s)	Blank(s)	Blank(s)	Recommended but not performed, unknown reason	Blank(s)	Blank(s)	Blank(s)	9	Blank(s)	Blank(s)	Blank(s)	Blank(s)	Blank(s)	Blank(s)	Blank(s)	Blank(s)	Blank(s)	Complete dates are available and there are more than 0 days of survival	Liver	1085	781	766	1065	760	1053	988	715	1	1983	Blank(s)	Blank(s)	Blank(s)	Dead
70-74 years	Other (American Indian/AK Native, Asian/Pacific Islander)	Male	Positive histology	Well differentiated; Grade I	Liver	8170	Blank(s)	Blank(s)	Blank(s)	Blank(s)	Blank(s)	Blank(s)	Recommended but not performed, unknown reason	Blank(s)	Blank(s)	Blank(s)	9	Blank(s)	Blank(s)	Blank(s)	Blank(s)	Blank(s)	Blank(s)	Blank(s)	Blank(s)	Blank(s)	Complete dates are available and there are more than 0 days of survival	Liver	797	484	467	759	477	760	695	453	1	1981	Blank(s)	Blank(s)	Blank(s)	Dead
40-44 years	Other (American Indian/AK Native, Asian/Pacific Islander)	Male	Positive histology	Unknown	Liver	8170	Blank(s)	Blank(s)	Blank(s)	Blank(s)	Blank(s)	Blank(s)	Recommended but not performed, unknown reason	Blank(s)	Blank(s)	Blank(s)	9	Blank(s)	Blank(s)	Blank(s)	Blank(s)	Blank(s)	Blank(s)	Blank(s)	Blank(s)	Blank(s)	Complete dates are available and there are more than 0 days of survival	Liver	1250	851	883	1288	861	1250	1179	819	8	1983	Blank(s)	Blank(s)	Blank(s)	Dead
55-59 years	White	Male	Positive histology	Unknown	Liver	8170	Blank(s)	Blank(s)	Blank(s)	Blank(s)	Blank(s)	Blank(s)	Recommended but not performed, unknown reason	Blank(s)	Blank(s)	Blank(s)	9	Blank(s)	Blank(s)	Blank(s)	Blank(s)	Blank(s)	Blank(s)	Blank(s)	Blank(s)	Blank(s)	Complete dates are available and there are more than 0 days of survival	Liver	1085	781	766	1065	760	1053	988	715	2	1981	Blank(s)	Blank(s)	Blank(s)	Dead
60-64 years	White	Male	Positive histology	Poorly differentiated; Grade III	Liver	8140	Blank(s)	Blank(s)	Blank(s)	Blank(s)	Blank(s)	Blank(s)	Recommended but not performed, unknown reason	Blank(s)	Blank(s)	Blank(s)	9	Blank(s)	Blank(s)	Blank(s)	Blank(s)	Blank(s)	Blank(s)	Blank(s)	Blank(s)	Blank(s)	Complete dates are available and there are more than 0 days of survival	Liver	797	484	467	759	477	760	695	453	7	1982	Blank(s)	Blank(s)	Blank(s)	Dead
50-54 years	Other (American Indian/AK Native, Asian/Pacific Islander)	Male	Positive histology	Unknown	Liver	8170	Blank(s)	Blank(s)	Blank(s)	Blank(s)	Blank(s)	Blank(s)	Recommended but not performed, unknown reason	Blank(s)	Blank(s)	Blank(s)	9	Blank(s)	Blank(s)	Blank(s)	Blank(s)	Blank(s)	Blank(s)	Blank(s)	Blank(s)	Blank(s)	Complete dates are available and there are more than 0 days of survival	Liver	1324	776	784	1328	817	1346	1230	761	4	1986	Blank(s)	Blank(s)	Blank(s)	Dead
75-79 years	Other (American Indian/AK Native, Asian/Pacific Islander)	Male	Positive histology	Unknown	Liver	8170	Blank(s)	Blank(s)	Blank(s)	Blank(s)	Blank(s)	Blank(s)	Recommended but not performed, unknown reason	Blank(s)	Blank(s)	Blank(s)	9	Blank(s)	Blank(s)	Blank(s)	Blank(s)	Blank(s)	Blank(s)	Blank(s)	Blank(s)	Blank(s)	Complete dates are available and there are more than 0 days of survival	Liver	1324	776	784	1328	817	1346	1230	761	3	1982	Blank(s)	Blank(s)	Blank(s)	Dead
70-74 years	Other (American Indian/AK Native, Asian/Pacific Islander)	Male	Positive histology	Unknown	Liver	8170	Blank(s)	Blank(s)	Blank(s)	Blank(s)	Blank(s)	Blank(s)	Recommended but not performed, unknown reason	Blank(s)	Blank(s)	Blank(s)	9	Blank(s)	Blank(s)	Blank(s)	Blank(s)	Blank(s)	Blank(s)	Blank(s)	Blank(s)	Blank(s)	Incomplete dates are available and there cannot be zero days of follow-up	State DC not available or state DC available but no COD	1250	851	883	1288	861	1250	1179	819	1	1987	Blank(s)	Blank(s)	Blank(s)	Dead
65-69 years	White	Male	Positive histology	Unknown	Liver	8170	Blank(s)	Blank(s)	Blank(s)	Blank(s)	Blank(s)	Blank(s)	Surgery performed	Blank(s)	Blank(s)	Blank(s)	90	Blank(s)	Blank(s)	Blank(s)	Blank(s)	Blank(s)	Blank(s)	Blank(s)	Blank(s)	Blank(s)	Complete dates are available and there are more than 0 days of survival	Liver	797	484	467	759	477	760	695	453	13	1986	Blank(s)	Blank(s)	Blank(s)	Dead
65-69 years	White	Male	Positive exfoliative cytology, no positive histology	Unknown	Liver	8170	Blank(s)	Blank(s)	Blank(s)	Blank(s)	Blank(s)	Blank(s)	Recommended but not performed, unknown reason	Blank(s)	Blank(s)	Blank(s)	9	Blank(s)	Blank(s)	Blank(s)	Blank(s)	Blank(s)	Blank(s)	Blank(s)	Blank(s)	Blank(s)	Complete dates are available and there are more than 0 days of survival	Liver	1085	781	766	1065	760	1053	988	715	2	1987	Blank(s)	Blank(s)	Blank(s)	Dead
60-64 years	Other (American Indian/AK Native, Asian/Pacific Islander)	Male	Positive histology	Unknown	Liver	8170	Blank(s)	Blank(s)	Blank(s)	Blank(s)	Blank(s)	Blank(s)	Surgery performed	Blank(s)	Blank(s)	Blank(s)	90	Blank(s)	Blank(s)	Blank(s)	Blank(s)	Blank(s)	Blank(s)	Blank(s)	Blank(s)	Blank(s)	Complete dates are available and there are more than 0 days of survival	Other Cause of Death	1324	776	784	1328	817	1346	1230	761	0	1982	Blank(s)	Blank(s)	Blank(s)	Dead
70-74 years	White	Male	Direct visualization without microscopic confirmation	Unknown	Liver	8170	Blank(s)	Blank(s)	Blank(s)	Blank(s)	Blank(s)	Blank(s)	Recommended but not performed, unknown reason	Blank(s)	Blank(s)	Blank(s)	9	Blank(s)	Blank(s)	Blank(s)	Blank(s)	Blank(s)	Blank(s)	Blank(s)	Blank(s)	Blank(s)	Complete dates are available and there are more than 0 days of survival	Liver	1324	776	784	1328	817	1346	1230	761	2	1985	Blank(s)	Blank(s)	Blank(s)	Dead
50-54 years	Other (American Indian/AK Native, Asian/Pacific Islander)	Male	Positive exfoliative cytology, no positive histology	Poorly differentiated; Grade III	Liver	8140	Blank(s)	Blank(s)	Blank(s)	Blank(s)	Blank(s)	Blank(s)	Recommended but not performed, unknown reason	Blank(s)	Blank(s)	Blank(s)	9	Blank(s)	Blank(s)	Blank(s)	Blank(s)	Blank(s)	Blank(s)	Blank(s)	Blank(s)	Blank(s)	Complete dates are available and there are more than 0 days of survival	Chronic Liver Disease and Cirrhosis	1250	851	883	1288	861	1250	1179	819	43	1981	Blank(s)	Blank(s)	Blank(s)	Dead
35-39 years	Other (American Indian/AK Native, Asian/Pacific Islander)	Female	Positive histology	Unknown	Liver	8170	Blank(s)	Blank(s)	Blank(s)	Blank(s)	Blank(s)	Blank(s)	Surgery performed	Blank(s)	Blank(s)	Blank(s)	90	Blank(s)	Blank(s)	Blank(s)	Blank(s)	Blank(s)	Blank(s)	Blank(s)	Blank(s)	Blank(s)	Complete dates are available and there are more than 0 days of survival	Liver	1250	851	883	1288	861	1250	1179	819	0	1985	Blank(s)	Blank(s)	Blank(s)	Dead
70-74 years	White	Female	Positive histology	Unknown	Liver	8170	Blank(s)	Blank(s)	Blank(s)	Blank(s)	Blank(s)	Blank(s)	Not recommended, contraindicated due to other cond; autopsy only (1973-2002)	Blank(s)	Blank(s)	Blank(s)	0	Blank(s)	Blank(s)	Blank(s)	Blank(s)	Blank(s)	Blank(s)	Blank(s)	Blank(s)	Blank(s)	Not calculated because a Death Certificate Only or Autopsy Only case	Chronic Liver Disease and Cirrhosis	1324	776	784	1328	817	1346	1230	761	Unknown	1984	Blank(s)	Blank(s)	Blank(s)	Dead
55-59 years	White	Male	Positive exfoliative cytology, no positive histology	Unknown	Liver	8170	Blank(s)	Blank(s)	Blank(s)	Blank(s)	Blank(s)	Blank(s)	Recommended but not performed, unknown reason	Blank(s)	Blank(s)	Blank(s)	9	Blank(s)	Blank(s)	Blank(s)	Blank(s)	Blank(s)	Blank(s)	Blank(s)	Blank(s)	Blank(s)	Complete dates are available and there are more than 0 days of survival	Liver	1324	776	784	1328	817	1346	1230	761	0	1985	Blank(s)	Blank(s)	Blank(s)	Dead
60-64 years	Other (American Indian/AK Native, Asian/Pacific Islander)	Male	Positive histology	Unknown	Liver	8170	Blank(s)	Blank(s)	Blank(s)	Blank(s)	Blank(s)	Blank(s)	Recommended but not performed, unknown reason	Blank(s)	Blank(s)	Blank(s)	9	Blank(s)	Blank(s)	Blank(s)	Blank(s)	Blank(s)	Blank(s)	Blank(s)	Blank(s)	Blank(s)	Complete dates are available and there are more than 0 days of survival	Diseases of Heart	1324	776	784	1328	817	1346	1230	761	0	1981	Blank(s)	Blank(s)	Blank(s)	Dead
75-79 years	White	Female	Positive histology	Unknown	Liver	8170	Blank(s)	Blank(s)	Blank(s)	Blank(s)	Blank(s)	Blank(s)	Recommended but not performed, unknown reason	Blank(s)	Blank(s)	Blank(s)	9	Blank(s)	Blank(s)	Blank(s)	Blank(s)	Blank(s)	Blank(s)	Blank(s)	Blank(s)	Blank(s)	Complete dates are available and there are more than 0 days of survival	Liver	1324	776	784	1328	817	1346	1230	761	7	1983	Blank(s)	Blank(s)	Blank(s)	Dead
75-79 years	Other (American Indian/AK Native, Asian/Pacific Islander)	Female	Positive histology	Moderately differentiated; Grade II	Liver	8170	Blank(s)	I	Blank(s)	16	None	None; diagnosed at autopsy	Surgery performed	Blank(s)	Blank(s)	Blank(s)	Blank(s)	Blank(s)	0	32	100	0	0	0	20	999	Complete dates are available and there are more than 0 days of survival	Alive	1324	776	784	1328	817	1346	1230	761	135	2005	Blank(s)	Blank(s)	Blank(s)	Alive
60-64 years	White	Female	Positive histology	Unknown	Liver	8170	Blank(s)	Blank(s)	Blank(s)	Blank(s)	Blank(s)	Blank(s)	Surgery performed	Blank(s)	Blank(s)	Blank(s)	90	Blank(s)	Blank(s)	Blank(s)	Blank(s)	Blank(s)	Blank(s)	Blank(s)	Blank(s)	Blank(s)	Complete dates are available and there are more than 0 days of survival	Diseases of Heart	1250	851	883	1288	861	1250	1179	819	359	1982	Blank(s)	Blank(s)	Blank(s)	Dead
30-34 years	Other (American Indian/AK Native, Asian/Pacific Islander)	Male	Clinical diagnosis only	Unknown	Liver	8170	Blank(s)	Blank(s)	Blank(s)	Blank(s)	Blank(s)	Blank(s)	Recommended but not performed, unknown reason	Blank(s)	Blank(s)	Blank(s)	9	Blank(s)	Blank(s)	Blank(s)	Blank(s)	Blank(s)	Blank(s)	Blank(s)	Blank(s)	Blank(s)	Complete dates are available and there are more than 0 days of survival	Other Infectious and Parasitic Diseases including HIV	797	484	467	759	477	760	695	453	2	1987	Blank(s)	Blank(s)	Blank(s)	Dead
75-79 years	White	Male	Positive histology	Unknown	Liver	8170	Blank(s)	Blank(s)	Blank(s)	Blank(s)	Blank(s)	Blank(s)	Recommended but not performed, unknown reason	Blank(s)	Blank(s)	Blank(s)	9	Blank(s)	Blank(s)	Blank(s)	Blank(s)	Blank(s)	Blank(s)	Blank(s)	Blank(s)	Blank(s)	Complete dates are available and there are more than 0 days of survival	Liver	1250	851	883	1288	861	1250	1179	819	4	1986	Blank(s)	Blank(s)	Blank(s)	Dead
85+ years	White	Male	Positive exfoliative cytology, no positive histology	Unknown	Liver	8170	Blank(s)	Blank(s)	Blank(s)	Blank(s)	Blank(s)	Blank(s)	Recommended but not performed, unknown reason	Blank(s)	Blank(s)	Blank(s)	9	Blank(s)	Blank(s)	Blank(s)	Blank(s)	Blank(s)	Blank(s)	Blank(s)	Blank(s)	Blank(s)	Complete dates are available and there are more than 0 days of survival	Liver	1324	776	784	1328	817	1346	1230	761	0	1982	Blank(s)	Blank(s)	Blank(s)	Dead
60-64 years	White	Female	Positive exfoliative cytology, no positive histology	Poorly differentiated; Grade III	Liver	8010	Blank(s)	Blank(s)	Blank(s)	Blank(s)	Blank(s)	Blank(s)	Recommended but not performed, unknown reason	Blank(s)	Blank(s)	Blank(s)	9	Blank(s)	Blank(s)	Blank(s)	Blank(s)	Blank(s)	Blank(s)	Blank(s)	Blank(s)	Blank(s)	Complete dates are available and there are more than 0 days of survival	Miscellaneous Malignant Cancer	797	484	467	759	477	760	695	453	3	1987	Blank(s)	Blank(s)	Blank(s)	Dead
60-64 years	White	Female	Positive histology	Unknown	Liver	8170	Blank(s)	Blank(s)	Blank(s)	Blank(s)	Blank(s)	Blank(s)	Recommended but not performed, unknown reason	Blank(s)	Blank(s)	Blank(s)	9	Blank(s)	Blank(s)	Blank(s)	Blank(s)	Blank(s)	Blank(s)	Blank(s)	Blank(s)	Blank(s)	Incomplete dates are available and there cannot be zero days of follow-up	Liver	833	495	534	878	444	774	723	419	7	1982	Blank(s)	Blank(s)	Blank(s)	Dead
45-49 years	Other (American Indian/AK Native, Asian/Pacific Islander)	Male	Radiography without microscopic confirm	Unknown	Liver	8140	Blank(s)	Blank(s)	Blank(s)	Blank(s)	Blank(s)	Blank(s)	Recommended but not performed, unknown reason	Blank(s)	Blank(s)	Blank(s)	9	Blank(s)	Blank(s)	Blank(s)	Blank(s)	Blank(s)	Blank(s)	Blank(s)	Blank(s)	Blank(s)	Complete dates are available and there are more than 0 days of survival	Aortic Aneurysm and Dissection	1250	851	883	1288	861	1250	1179	819	310	1981	Blank(s)	Blank(s)	Blank(s)	Dead
50-54 years	Other (American Indian/AK Native, Asian/Pacific Islander)	Male	Positive histology	Unknown	Liver	8170	Blank(s)	Blank(s)	Blank(s)	Blank(s)	Blank(s)	Blank(s)	Surgery performed	Blank(s)	Blank(s)	Blank(s)	90	Blank(s)	Blank(s)	Blank(s)	Blank(s)	Blank(s)	Blank(s)	Blank(s)	Blank(s)	Blank(s)	Complete dates are available and there are more than 0 days of survival	Liver	1324	776	784	1328	817	1346	1230	761	90	1983	Blank(s)	Blank(s)	Blank(s)	Dead
65-69 years	Black	Female	Positive laboratory test/marker study	Unknown	Liver	8170	Blank(s)	II	Blank(s)	0	None	None; diagnosed at autopsy	Not recommended	Blank(s)	Blank(s)	Blank(s)	Blank(s)	Blank(s)	0	42	440	0	0	0	10	1	Complete dates are available and there are more than 0 days of survival	Miscellaneous Malignant Cancer	1324	776	784	1328	817	1346	1230	761	1	2009	Blank(s)	Blank(s)	Blank(s)	Dead
65-69 years	White	Male	Positive histology	Unknown	Liver	8170	Blank(s)	Blank(s)	Blank(s)	Blank(s)	Blank(s)	Blank(s)	Recommended but not performed, unknown reason	Blank(s)	Blank(s)	Blank(s)	9	Blank(s)	Blank(s)	Blank(s)	Blank(s)	Blank(s)	Blank(s)	Blank(s)	Blank(s)	Blank(s)	Complete dates are available and there are more than 0 days of survival	Chronic Liver Disease and Cirrhosis	1324	776	784	1328	817	1346	1230	761	0	1981	Blank(s)	Blank(s)	Blank(s)	Dead
70-74 years	White	Female	Clinical diagnosis only	Unknown	Liver	8010	Blank(s)	Blank(s)	Blank(s)	Blank(s)	Blank(s)	Blank(s)	Recommended but not performed, unknown reason	Blank(s)	Blank(s)	Blank(s)	9	Blank(s)	Blank(s)	Blank(s)	Blank(s)	Blank(s)	Blank(s)	Blank(s)	Blank(s)	Blank(s)	Complete dates are available and there are more than 0 days of survival	Liver	1250	851	883	1288	861	1250	1179	819	0	1987	Blank(s)	Blank(s)	Blank(s)	Dead
70-74 years	White	Male	Positive histology	Unknown	Liver	8170	Blank(s)	Blank(s)	Blank(s)	Blank(s)	Blank(s)	Blank(s)	Recommended but not performed, unknown reason	Blank(s)	Blank(s)	Blank(s)	9	Blank(s)	Blank(s)	Blank(s)	Blank(s)	Blank(s)	Blank(s)	Blank(s)	Blank(s)	Blank(s)	Complete dates are available and there are more than 0 days of survival	Liver	1085	781	766	1065	760	1053	988	715	6	1982	Blank(s)	Blank(s)	Blank(s)	Dead
50-54 years	Black	Male	Positive histology	Unknown	Liver	8170	Blank(s)	Blank(s)	Blank(s)	Blank(s)	Blank(s)	Blank(s)	Recommended but not performed, unknown reason	Blank(s)	Blank(s)	Blank(s)	9	Blank(s)	Blank(s)	Blank(s)	Blank(s)	Blank(s)	Blank(s)	Blank(s)	Blank(s)	Blank(s)	Complete dates are available and there are more than 0 days of survival	Liver	797	484	467	759	477	760	695	453	1	1982	Blank(s)	Blank(s)	Blank(s)	Dead
55-59 years	Black	Male	Radiography without microscopic confirm	Unknown	Liver	8170	Blank(s)	Blank(s)	Blank(s)	Blank(s)	Blank(s)	Blank(s)	Recommended but not performed, unknown reason	Blank(s)	Blank(s)	Blank(s)	9	Blank(s)	Blank(s)	Blank(s)	Blank(s)	Blank(s)	Blank(s)	Blank(s)	Blank(s)	Blank(s)	Complete dates are available and there are more than 0 days of survival	Liver	797	484	467	759	477	760	695	453	0	1981	Blank(s)	Blank(s)	Blank(s)	Dead
75-79 years	Other (American Indian/AK Native, Asian/Pacific Islander)	Female	Positive histology	Unknown	Liver	8170	Blank(s)	Blank(s)	Blank(s)	Blank(s)	Blank(s)	Blank(s)	Recommended but not performed, unknown reason	Blank(s)	Blank(s)	Blank(s)	9	Blank(s)	Blank(s)	Blank(s)	Blank(s)	Blank(s)	Blank(s)	Blank(s)	Blank(s)	Blank(s)	Complete dates are available and there are more than 0 days of survival	Liver	797	484	467	759	477	760	695	453	32	1983	Blank(s)	Blank(s)	Blank(s)	Dead
40-44 years	White	Male	Positive histology	Poorly differentiated; Grade III	Liver	8170	Blank(s)	Blank(s)	Blank(s)	Blank(s)	Blank(s)	Blank(s)	Surgery performed	Blank(s)	Blank(s)	Blank(s)	90	Blank(s)	Blank(s)	Blank(s)	Blank(s)	Blank(s)	Blank(s)	Blank(s)	Blank(s)	Blank(s)	Complete dates are available and there are more than 0 days of survival	Liver	1324	776	784	1328	817	1346	1230	761	1	1986	Blank(s)	Blank(s)	Blank(s)	Dead
75-79 years	Other (American Indian/AK Native, Asian/Pacific Islander)	Male	Positive histology	Unknown	Liver	8170	Blank(s)	Blank(s)	88	Blank(s)	Blank(s)	Blank(s)	Surgery performed	Blank(s)	Blank(s)	Blank(s)	40	Blank(s)	0	Blank(s)	Blank(s)	Blank(s)	Blank(s)	Blank(s)	Blank(s)	Blank(s)	Complete dates are available and there are more than 0 days of survival	Liver	1250	851	883	1288	861	1250	1179	819	44	1991	Blank(s)	Blank(s)	Blank(s)	Dead
65-69 years	White	Male	Positive histology	Unknown	Liver	8170	Blank(s)	Blank(s)	Blank(s)	Blank(s)	Blank(s)	Blank(s)	Surgery performed	Blank(s)	Blank(s)	Blank(s)	90	Blank(s)	Blank(s)	Blank(s)	Blank(s)	Blank(s)	Blank(s)	Blank(s)	Blank(s)	Blank(s)	Complete dates are available and there are more than 0 days of survival	Other Cause of Death	1324	776	784	1328	817	1346	1230	761	236	1985	Blank(s)	Blank(s)	Blank(s)	Dead
85+ years	White	Male	Positive histology	Unknown	Liver	8170	Blank(s)	Blank(s)	88	Blank(s)	Blank(s)	Blank(s)	Not recommended	Blank(s)	Blank(s)	Blank(s)	2	Blank(s)	0	Blank(s)	Blank(s)	Blank(s)	Blank(s)	Blank(s)	Blank(s)	Blank(s)	Complete dates are available and there are more than 0 days of survival	Liver	1324	776	784	1328	817	1346	1230	761	0	1994	Blank(s)	Blank(s)	Blank(s)	Dead
50-54 years	White	Male	Positive exfoliative cytology, no positive histology	Undifferentiated; anaplastic; Grade IV	Liver	8140	Blank(s)	Blank(s)	88	Blank(s)	Blank(s)	Blank(s)	Not recommended	Blank(s)	Blank(s)	Blank(s)	0	Blank(s)	0	Blank(s)	Blank(s)	Blank(s)	Blank(s)	Blank(s)	Blank(s)	Blank(s)	Complete dates are available and there are more than 0 days of survival	Other Biliary	833	495	534	878	444	774	723	419	3	1990	Blank(s)	Blank(s)	Blank(s)	Dead
70-74 years	Black	Female	Positive histology	Poorly differentiated; Grade III	Liver	8170	Blank(s)	Blank(s)	Blank(s)	Blank(s)	Blank(s)	Blank(s)	Recommended but not performed, unknown reason	Blank(s)	Blank(s)	Blank(s)	9	Blank(s)	Blank(s)	Blank(s)	Blank(s)	Blank(s)	Blank(s)	Blank(s)	Blank(s)	Blank(s)	Complete dates are available and there are more than 0 days of survival	Liver	1250	851	883	1288	861	1250	1179	819	0	1983	Blank(s)	Blank(s)	Blank(s)	Dead
65-69 years	White	Female	Positive histology	Well differentiated; Grade I	BileDuctsIntraHepat	8160	NA	IV	Blank(s)	50	4 or more regional lymph nodes removed	None; diagnosed at autopsy	Surgery performed	Blank(s)	Blank(s)	Blank(s)	Blank(s)	Blank(s)	5	110	640	110	40	3	10	999	Complete dates are available and there are more than 0 days of survival	Other Diseases of Arteries, Arterioles, Capillaries	833	495	534	878	444	774	723	419	3	2014	NA	NA	NA	Dead
45-49 years	Black	Male	Positive histology	Unknown	Liver	8170	Blank(s)	Blank(s)	Blank(s)	Blank(s)	Blank(s)	Blank(s)	Recommended but not performed, unknown reason	Blank(s)	Blank(s)	Blank(s)	9	Blank(s)	Blank(s)	Blank(s)	Blank(s)	Blank(s)	Blank(s)	Blank(s)	Blank(s)	Blank(s)	Complete dates are available and there are more than 0 days of survival	Liver	1324	776	784	1328	817	1346	1230	761	0	1980	Blank(s)	Blank(s)	Blank(s)	Dead
65-69 years	White	Male	Positive histology	Unknown	Liver	8170	Blank(s)	Blank(s)	Blank(s)	Blank(s)	Blank(s)	Blank(s)	Recommended but not performed, unknown reason	Blank(s)	Blank(s)	Blank(s)	9	Blank(s)	Blank(s)	Blank(s)	Blank(s)	Blank(s)	Blank(s)	Blank(s)	Blank(s)	Blank(s)	Complete dates are available and there are more than 0 days of survival	Liver	1250	851	883	1288	861	1250	1179	819	0	1983	Blank(s)	Blank(s)	Blank(s)	Dead
80-84 years	Other (American Indian/AK Native, Asian/Pacific Islander)	Male	Positive histology	Unknown	Liver	8170	Blank(s)	Blank(s)	Blank(s)	Blank(s)	Blank(s)	Blank(s)	Recommended but not performed, unknown reason	Blank(s)	Blank(s)	Blank(s)	9	Blank(s)	Blank(s)	Blank(s)	Blank(s)	Blank(s)	Blank(s)	Blank(s)	Blank(s)	Blank(s)	Complete dates are available and there are more than 0 days of survival	Liver	1324	776	784	1328	817	1346	1230	761	0	1983	Blank(s)	Blank(s)	Blank(s)	Dead
75-79 years	Other (American Indian/AK Native, Asian/Pacific Islander)	Female	Positive histology	Unknown	Liver	8170	Blank(s)	Blank(s)	Blank(s)	Blank(s)	Blank(s)	Blank(s)	Surgery performed	Blank(s)	Blank(s)	Blank(s)	90	Blank(s)	Blank(s)	Blank(s)	Blank(s)	Blank(s)	Blank(s)	Blank(s)	Blank(s)	Blank(s)	Complete dates are available and there are more than 0 days of survival	Cerebrovascular Diseases	1324	776	784	1328	817	1346	1230	761	149	1984	Blank(s)	Blank(s)	Blank(s)	Dead
75-79 years	White	Female	Clinical diagnosis only	Unknown	Liver	8170	Blank(s)	Blank(s)	Blank(s)	Blank(s)	Blank(s)	Blank(s)	Recommended but not performed, unknown reason	Blank(s)	Blank(s)	Blank(s)	9	Blank(s)	Blank(s)	Blank(s)	Blank(s)	Blank(s)	Blank(s)	Blank(s)	Blank(s)	Blank(s)	Complete dates are available and there are more than 0 days of survival	Diabetes Mellitus	1250	851	883	1288	861	1250	1179	819	0	1983	Blank(s)	Blank(s)	Blank(s)	Dead
45-49 years	Black	Male	Positive histology	Unknown	Liver	8170	Blank(s)	Blank(s)	Blank(s)	Blank(s)	Blank(s)	Blank(s)	Recommended but not performed, unknown reason	Blank(s)	Blank(s)	Blank(s)	9	Blank(s)	Blank(s)	Blank(s)	Blank(s)	Blank(s)	Blank(s)	Blank(s)	Blank(s)	Blank(s)	Complete dates are available and there are more than 0 days of survival	Liver	1250	851	883	1288	861	1250	1179	819	0	1983	Blank(s)	Blank(s)	Blank(s)	Dead
65-69 years	White	Male	Positive histology	Poorly differentiated; Grade III	Liver	8170	Blank(s)	Blank(s)	Blank(s)	Blank(s)	Blank(s)	Blank(s)	Recommended but not performed, unknown reason	Blank(s)	Blank(s)	Blank(s)	9	Blank(s)	Blank(s)	Blank(s)	Blank(s)	Blank(s)	Blank(s)	Blank(s)	Blank(s)	Blank(s)	Complete dates are available and there are more than 0 days of survival	Liver	1324	776	784	1328	817	1346	1230	761	12	1981	Blank(s)	Blank(s)	Blank(s)	Dead
75-79 years	White	Female	Radiography without microscopic confirm	Unknown	Liver	8170	Blank(s)	Blank(s)	Blank(s)	Blank(s)	Blank(s)	Blank(s)	Recommended but not performed, unknown reason	Blank(s)	Blank(s)	Blank(s)	9	Blank(s)	Blank(s)	Blank(s)	Blank(s)	Blank(s)	Blank(s)	Blank(s)	Blank(s)	Blank(s)	Complete dates are available and there are more than 0 days of survival	Liver	797	484	467	759	477	760	695	453	0	1983	Blank(s)	Blank(s)	Blank(s)	Dead
65-69 years	Other (American Indian/AK Native, Asian/Pacific Islander)	Female	Positive histology	Unknown	Liver	8170	Blank(s)	Blank(s)	Blank(s)	Blank(s)	Blank(s)	Blank(s)	Recommended but not performed, unknown reason	Blank(s)	Blank(s)	Blank(s)	9	Blank(s)	Blank(s)	Blank(s)	Blank(s)	Blank(s)	Blank(s)	Blank(s)	Blank(s)	Blank(s)	Complete dates are available and there are more than 0 days of survival	Liver	797	484	467	759	477	760	695	453	0	1983	Blank(s)	Blank(s)	Blank(s)	Dead
35-39 years	Other (American Indian/AK Native, Asian/Pacific Islander)	Male	Positive histology	Unknown	Liver	8170	Blank(s)	Blank(s)	Blank(s)	Blank(s)	Blank(s)	Blank(s)	Recommended but not performed, unknown reason	Blank(s)	Blank(s)	Blank(s)	9	Blank(s)	Blank(s)	Blank(s)	Blank(s)	Blank(s)	Blank(s)	Blank(s)	Blank(s)	Blank(s)	Complete dates are available and there are more than 0 days of survival	Liver	1250	851	883	1288	861	1250	1179	819	0	1983	Blank(s)	Blank(s)	Blank(s)	Dead
70-74 years	White	Male	Positive histology	Unknown	BileDuctsIntraHepat	8160	NA	IV	Blank(s)	0	None	None; diagnosed at autopsy	Not recommended	Blank(s)	Blank(s)	Blank(s)	Blank(s)	Blank(s)	0	146	460	999	40	0	998	0	Complete dates are available and there are more than 0 days of survival	Other Biliary	797	484	467	759	477	760	695	453	7	2014	NA	NA	NA	Dead
85+ years	White	Male	Radiography without microscopic confirm	Unknown	Liver	8000	Blank(s)	Blank(s)	Blank(s)	Blank(s)	Blank(s)	Blank(s)	Recommended but not performed, unknown reason	Blank(s)	Blank(s)	Blank(s)	9	Blank(s)	Blank(s)	Blank(s)	Blank(s)	Blank(s)	Blank(s)	Blank(s)	Blank(s)	Blank(s)	Complete dates are available and there are more than 0 days of survival	Miscellaneous Malignant Cancer	1324	776	784	1328	817	1346	1230	761	2	1985	Blank(s)	Blank(s)	Blank(s)	Dead
30-34 years	Black	Male	Positive histology	Poorly differentiated; Grade III	Liver	9120	Blank(s)	Blank(s)	Blank(s)	Blank(s)	Blank(s)	Blank(s)	Recommended but not performed, unknown reason	Blank(s)	Blank(s)	Blank(s)	9	Blank(s)	Blank(s)	Blank(s)	Blank(s)	Blank(s)	Blank(s)	Blank(s)	Blank(s)	Blank(s)	Complete dates are available and there are more than 0 days of survival	Liver	797	484	467	759	477	760	695	453	0	1985	Blank(s)	Blank(s)	Blank(s)	Dead
40-44 years	White	Male	Positive exfoliative cytology, no positive histology	Unknown	Liver	8170	Blank(s)	Blank(s)	Blank(s)	Blank(s)	Blank(s)	Blank(s)	Recommended but not performed, unknown reason	Blank(s)	Blank(s)	Blank(s)	9	Blank(s)	Blank(s)	Blank(s)	Blank(s)	Blank(s)	Blank(s)	Blank(s)	Blank(s)	Blank(s)	Complete dates are available and there are more than 0 days of survival	Liver	1324	776	784	1328	817	1346	1230	761	0	1987	Blank(s)	Blank(s)	Blank(s)	Dead
70-74 years	White	Female	Positive histology	Unknown	Liver	8170	Blank(s)	Blank(s)	Blank(s)	Blank(s)	Blank(s)	Blank(s)	Recommended but not performed, unknown reason	Blank(s)	Blank(s)	Blank(s)	9	Blank(s)	Blank(s)	Blank(s)	Blank(s)	Blank(s)	Blank(s)	Blank(s)	Blank(s)	Blank(s)	Incomplete dates are available and there cannot be zero days of follow-up	Liver	1324	776	784	1328	817	1346	1230	761	12	1985	Blank(s)	Blank(s)	Blank(s)	Dead
85+ years	White	Male	Positive histology	Poorly differentiated; Grade III	Liver	8170	Blank(s)	Blank(s)	Blank(s)	Blank(s)	Blank(s)	Blank(s)	Recommended but not performed, unknown reason	Blank(s)	Blank(s)	Blank(s)	9	Blank(s)	Blank(s)	Blank(s)	Blank(s)	Blank(s)	Blank(s)	Blank(s)	Blank(s)	Blank(s)	Complete dates are available and there are more than 0 days of survival	Liver	1324	776	784	1328	817	1346	1230	761	0	1985	Blank(s)	Blank(s)	Blank(s)	Dead
55-59 years	White	Male	Unknown	Unknown	Liver	8170	Blank(s)	Blank(s)	Blank(s)	Blank(s)	Blank(s)	Blank(s)	Recommended but not performed, unknown reason	Blank(s)	Blank(s)	Blank(s)	9	Blank(s)	Blank(s)	Blank(s)	Blank(s)	Blank(s)	Blank(s)	Blank(s)	Blank(s)	Blank(s)	Incomplete dates are available and there cannot be zero days of follow-up	Liver	1324	776	784	1328	817	1346	1230	761	1	1985	Blank(s)	Blank(s)	Blank(s)	Dead
45-49 years	White	Male	Radiography without microscopic confirm	Unknown	Liver	8170	Blank(s)	Blank(s)	Blank(s)	Blank(s)	Blank(s)	Blank(s)	Recommended but not performed, unknown reason	Blank(s)	Blank(s)	Blank(s)	9	Blank(s)	Blank(s)	Blank(s)	Blank(s)	Blank(s)	Blank(s)	Blank(s)	Blank(s)	Blank(s)	Complete dates are available and there are more than 0 days of survival	Liver	1250	851	883	1288	861	1250	1179	819	0	1980	Blank(s)	Blank(s)	Blank(s)	Dead
85+ years	White	Female	Unknown	Unknown	Liver	8140	Blank(s)	Blank(s)	Blank(s)	Blank(s)	Blank(s)	Blank(s)	Unknown; death certificate; or autopsy only (2003+)	Blank(s)	Blank(s)	Blank(s)	9	Blank(s)	Blank(s)	Blank(s)	Blank(s)	Blank(s)	Blank(s)	Blank(s)	Blank(s)	Blank(s)	Not calculated because a Death Certificate Only or Autopsy Only case	Liver	797	484	467	759	477	760	695	453	Unknown	1985	Blank(s)	Blank(s)	Blank(s)	Dead
85+ years	White	Female	Positive histology	Unknown	Liver	8170	Blank(s)	Blank(s)	Blank(s)	Blank(s)	Blank(s)	Blank(s)	Recommended but not performed, unknown reason	Blank(s)	Blank(s)	Blank(s)	9	Blank(s)	Blank(s)	Blank(s)	Blank(s)	Blank(s)	Blank(s)	Blank(s)	Blank(s)	Blank(s)	Complete dates are available and there are 0 days of survival	Liver	1250	851	883	1288	861	1250	1179	819	0	1986	Blank(s)	Blank(s)	Blank(s)	Dead
60-64 years	White	Male	Unknown	Unknown	Liver	8000	Blank(s)	Blank(s)	Blank(s)	Blank(s)	Blank(s)	Blank(s)	Unknown; death certificate; or autopsy only (2003+)	Blank(s)	Blank(s)	Blank(s)	9	Blank(s)	Blank(s)	Blank(s)	Blank(s)	Blank(s)	Blank(s)	Blank(s)	Blank(s)	Blank(s)	Not calculated because a Death Certificate Only or Autopsy Only case	Liver	833	495	534	878	444	774	723	419	Unknown	1980	Blank(s)	Blank(s)	Blank(s)	Dead
65-69 years	Other (American Indian/AK Native, Asian/Pacific Islander)	Male	Radiography without microscopic confirm	Unknown	Liver	8170	Blank(s)	Blank(s)	Blank(s)	Blank(s)	Blank(s)	Blank(s)	Recommended but not performed, unknown reason	Blank(s)	Blank(s)	Blank(s)	9	Blank(s)	Blank(s)	Blank(s)	Blank(s)	Blank(s)	Blank(s)	Blank(s)	Blank(s)	Blank(s)	Complete dates are available and there are more than 0 days of survival	Liver	1250	851	883	1288	861	1250	1179	819	27	1987	Blank(s)	Blank(s)	Blank(s)	Dead
85+ years	White	Female	Unknown	Unknown	Liver	8170	Blank(s)	Blank(s)	Blank(s)	Blank(s)	Blank(s)	Blank(s)	Unknown; death certificate; or autopsy only (2003+)	Blank(s)	Blank(s)	Blank(s)	9	Blank(s)	Blank(s)	Blank(s)	Blank(s)	Blank(s)	Blank(s)	Blank(s)	Blank(s)	Blank(s)	Not calculated because a Death Certificate Only or Autopsy Only case	Liver	1250	851	883	1288	861	1250	1179	819	Unknown	1980	Blank(s)	Blank(s)	Blank(s)	Dead
70-74 years	White	Male	Clinical diagnosis only	Unknown	Liver	8010	Blank(s)	Blank(s)	Blank(s)	Blank(s)	Blank(s)	Blank(s)	Recommended but not performed, unknown reason	Blank(s)	Blank(s)	Blank(s)	9	Blank(s)	Blank(s)	Blank(s)	Blank(s)	Blank(s)	Blank(s)	Blank(s)	Blank(s)	Blank(s)	Complete dates are available and there are more than 0 days of survival	Liver	1085	781	766	1065	760	1053	988	715	0	1985	Blank(s)	Blank(s)	Blank(s)	Dead
85+ years	White	Female	Unknown	Unknown	Liver	8010	Blank(s)	Blank(s)	Blank(s)	Blank(s)	Blank(s)	Blank(s)	Unknown; death certificate; or autopsy only (2003+)	Blank(s)	Blank(s)	Blank(s)	9	Blank(s)	Blank(s)	Blank(s)	Blank(s)	Blank(s)	Blank(s)	Blank(s)	Blank(s)	Blank(s)	Not calculated because a Death Certificate Only or Autopsy Only case	Liver	1250	851	883	1288	861	1250	1179	819	Unknown	1980	Blank(s)	Blank(s)	Blank(s)	Dead
50-54 years	Other (American Indian/AK Native, Asian/Pacific Islander)	Male	Positive histology	Well differentiated; Grade I	Liver	8170	Blank(s)	Blank(s)	Blank(s)	Blank(s)	Blank(s)	Blank(s)	Recommended but not performed, unknown reason	Blank(s)	Blank(s)	Blank(s)	9	Blank(s)	Blank(s)	Blank(s)	Blank(s)	Blank(s)	Blank(s)	Blank(s)	Blank(s)	Blank(s)	Complete dates are available and there are more than 0 days of survival	State DC not available or state DC available but no COD	1324	776	784	1328	817	1346	1230	761	1	1986	Blank(s)	Blank(s)	Blank(s)	Dead
[truncated: 125,139 more rows]
